# Supplementary material for: Global Methylome and gene expression analysis during early Peanut pod development
Source: BMC Plant Biol. 2018 Dec 13;18:352. doi: 10.1186/s12870-018-1546-4 (PMC6293580; doi:10.1186/s12870-018-1546-4)
Supplement: Supplementary file 4 — Table S4. Differentially expressed genes. (XLS 8234 kb) [file 12870_2018_1546_MOESM4_ESM.xls]

## Sheet: S1-S2
Up	Araip.K42T4	1%2C2-dihydroxy-3-keto-5-methylthiopentene dioxygenase%3B IPR004313 (Acireductone dioxygenase ARD family)%3B GO:0010309 (acireductone dioxygenase [iron(II)-requiring] activity)%2C GO:0055114 (oxidation-reduction process)
Up	Aradu.QM6VA	1%2C2-dihydroxy-3-keto-5-methylthiopentene dioxygenase%3B IPR004313 (Acireductone dioxygenase ARD family)%3B GO:0010309 (acireductone dioxygenase [iron(II)-requiring] activity)%2C GO:0055114 (oxidation-reduction process)
Up	Aradu.FG097	12-oxophytodienoate reductase 2%3B IPR013785 (Aldolase-type TIM barrel)%3B GO:0003824 (catalytic activity)%2C GO:0010181 (FMN binding)%2C GO:0016491 (oxidoreductase activity)%2C GO:0055114 (oxidation-reduction process)
Up	Aradu.BGM0C	17.8 kDa class I heat shock protein-like [Glycine max]%3B IPR008978 (HSP20-like chaperone)
Down	Aradu.739Q1	1-aminocyclopropane-1-carboxylate oxidase homolog 1 [Glycine max]%3B IPR005123 (Oxoglutarate/iron-dependent dioxygenase)%2C IPR026992 (Non-haem dioxygenase N-terminal domain)%2C IPR027443 (Isopenicillin N synthase-like)%3B GO:0016491 (oxidoreductase activity)%2C GO:0055114 (oxidation-reduction process)
Down	Aradu.X87GF	1-aminocyclopropane-1-carboxylate oxidase homolog 1-like [Glycine max]%3B IPR005123 (Oxoglutarate/iron-dependent dioxygenase)%2C IPR026992 (Non-haem dioxygenase N-terminal domain)%2C IPR027443 (Isopenicillin N synthase-like)%3B GO:0016491 (oxidoreductase activity)%2C GO:0055114 (oxidation-reduction process)
Up	Aradu.ILB9Z	1-aminocyclopropane-1-carboxylate oxidase%3B IPR005123 (Oxoglutarate/iron-dependent dioxygenase)%2C IPR026992 (Non-haem dioxygenase N-terminal domain)%2C IPR027443 (Isopenicillin N synthase-like)%3B GO:0016491 (oxidoreductase activity)%2C GO:0055114 (oxidation-reduction process)
Up	Aradu.QV0LR	1-cysteine peroxiredoxin 1%3B IPR012336 (Thioredoxin-like fold)%2C IPR024706 (Peroxiredoxin%2C AhpC-type)%3B GO:0016209 (antioxidant activity)%2C GO:0016491 (oxidoreductase activity)%2C GO:0051920 (peroxiredoxin activity)%2C GO:0055114 (oxidation-reduction process)
Up	Araip.LU6MK	1-deoxy-D-xylulose 5-phosphate synthase 3%3B IPR005476 (Transketolase%2C C-terminal)%2C IPR009014 (Transketolase%2C C-terminal/Pyruvate-ferredoxin oxidoreductase%2C domain II)%3B GO:0003824 (catalytic activity)%2C GO:0008152 (metabolic process)
Up	Aradu.8ZG8V	2%2C3-diketo-5-methylthio-1-phosphopentane phosphatase%3B IPR006383 (HAD-superfamily hydrolase%2C subfamily IB%2C PSPase-like)%2C IPR023214 (HAD-like domain)%3B GO:0008152 (metabolic process)%2C GO:0016791 (phosphatase activity)
Up	Aradu.0V7ZE	23kDa polypeptide of the oxygen evolving complex of photosystem II n%3D5 Tax%3DSonneratia RepID%3DA9XNJ0_9MYRT%3B IPR002683 (Photosystem II PsbP%2C oxygen evolving complex)%3B GO:0005509 (calcium ion binding)%2C GO:0009523 (photosystem II)%2C GO:0009654 (photosystem II oxygen evolving complex)%2C GO:0015979 (photosynthesis)%2C GO:0019898 (extrinsic component of membrane)
Up	Aradu.B353U	23kDa polypeptide of the oxygen evolving complex of photosystem II n%3D5 Tax%3DSonneratia RepID%3DA9XNJ0_9MYRT%3B IPR002683 (Photosystem II PsbP%2C oxygen evolving complex)%3B GO:0005509 (calcium ion binding)%2C GO:0009523 (photosystem II)%2C GO:0009654 (photosystem II oxygen evolving complex)%2C GO:0015979 (photosynthesis)%2C GO:0019898 (extrinsic component of membrane)
Down	Aradu.6Y81Q	26S proteasome regulatory subunit S2 1A%3B IPR016643 (26S proteasome regulatory complex%2C non-ATPase subcomplex%2C Rpn1 subunit)%3B GO:0000502 (proteasome complex)%2C GO:0005488 (binding)%2C GO:0030234 (enzyme regulator activity)%2C GO:0042176 (regulation of protein catabolic process)
Up	Aradu.YPY6M	2Fe-2S iron-sulfur cluster-binding domain protein%3B IPR012675 (Beta-grasp domain)%3B GO:0009055 (electron carrier activity)%2C GO:0051536 (iron-sulfur cluster binding)
Up	Aradu.U5UGY	2-oxoglutarate (2OG) and Fe(II)-dependent oxygenase superfamily protein%3B IPR002283 (Isopenicillin N synthase)%2C IPR026992 (Non-haem dioxygenase N-terminal domain)%2C IPR027443 (Isopenicillin N synthase-like)%3B GO:0005506 (iron ion binding)%2C GO:0016491 (oxidoreductase activity)%2C GO:0055114 (oxidation-reduction process)
Up	Araip.5DJ69	2-oxoglutarate (2OG) and Fe(II)-dependent oxygenase superfamily protein%3B IPR002283 (Isopenicillin N synthase)%2C IPR026992 (Non-haem dioxygenase N-terminal domain)%2C IPR027443 (Isopenicillin N synthase-like)%3B GO:0005506 (iron ion binding)%2C GO:0016491 (oxidoreductase activity)%2C GO:0055114 (oxidation-reduction process)
Down	Aradu.TIU03	2-oxoglutarate (2OG) and Fe(II)-dependent oxygenase superfamily protein%3B IPR002283 (Isopenicillin N synthase)%2C IPR026992 (Non-haem dioxygenase N-terminal domain)%2C IPR027443 (Isopenicillin N synthase-like)%3B GO:0005506 (iron ion binding)%2C GO:0016491 (oxidoreductase activity)%2C GO:0055114 (oxidation-reduction process)
Down	Aradu.TV3WI	2-oxoglutarate (2OG) and Fe(II)-dependent oxygenase superfamily protein%3B IPR005123 (Oxoglutarate/iron-dependent dioxygenase)%2C IPR026992 (Non-haem dioxygenase N-terminal domain)%2C IPR027443 (Isopenicillin N synthase-like)%3B GO:0016491 (oxidoreductase activity)%2C GO:0055114 (oxidation-reduction process)
Up	Aradu.V3CWF	2-oxoglutarate (2OG) and Fe(II)-dependent oxygenase superfamily protein%3B IPR005123 (Oxoglutarate/iron-dependent dioxygenase)%2C IPR026992 (Non-haem dioxygenase N-terminal domain)%2C IPR027443 (Isopenicillin N synthase-like)%3B GO:0016491 (oxidoreductase activity)%2C GO:0055114 (oxidation-reduction process)
Down	Aradu.Z9DZQ	2-oxoglutarate (2OG) and Fe(II)-dependent oxygenase superfamily protein%3B IPR005123 (Oxoglutarate/iron-dependent dioxygenase)%2C IPR026992 (Non-haem dioxygenase N-terminal domain)%2C IPR027443 (Isopenicillin N synthase-like)%3B GO:0016491 (oxidoreductase activity)%2C GO:0055114 (oxidation-reduction process)
Down	Aradu.W6H6W	2-oxoglutarate (2OG) and Fe(II)-dependent oxygenase superfamily protein%3B IPR005123 (Oxoglutarate/iron-dependent dioxygenase)%2C IPR026992 (Non-haem dioxygenase N-terminal domain)%2C IPR027443 (Isopenicillin N synthase-like)%3B GO:0016491 (oxidoreductase activity)%2C GO:0055114 (oxidation-reduction process)
Down	Aradu.X81G8	2-oxoglutarate (2OG) and Fe(II)-dependent oxygenase superfamily protein%3B IPR006620 (Prolyl 4-hydroxylase%2C alpha subunit)%3B GO:0005506 (iron ion binding)%2C GO:0031418 (L-ascorbic acid binding)%2C GO:0055114 (oxidation-reduction process)
Up	Aradu.VX1BY	2-oxoisovalerate dehydrogenase subunit alpha%3B IPR001017 (Dehydrogenase%2C E1 component)%3B GO:0008152 (metabolic process)
Up	Aradu.88CYL	2-phosphoglycolate phosphatase 1%3B IPR006357 (HAD-superfamily hydrolase%2C subfamily IIA)%2C IPR023214 (HAD-like domain)%2C IPR023215 (Nitrophenylphosphatase-like domain)%3B GO:0008152 (metabolic process)%2C GO:0016791 (phosphatase activity)
Up	Aradu.A0LLL	3'(2')%2C5'-bisphosphate nucleotidase%3B IPR000760 (Inositol monophosphatase)%3B GO:0006790 (sulfur compound metabolic process)%2C GO:0046854 (phosphatidylinositol phosphorylation)
Up	Araip.HCZ7U	30S ribosomal protein S10%3B IPR001848 (Ribosomal protein S10)%2C IPR027486 (Ribosomal protein S10 domain)%3B GO:0003735 (structural constituent of ribosome)%2C GO:0005840 (ribosome)%2C GO:0006412 (translation)
Up	Aradu.78B2S	30S ribosomal protein S14%2C chloroplastic n%3D2 Tax%3DMesangiospermae RepID%3DR9ZTX7_GLYTO%3B IPR001209 (Ribosomal protein S14)%3B GO:0003735 (structural constituent of ribosome)%2C GO:0005622 (intracellular)%2C GO:0005840 (ribosome)%2C GO:0006412 (translation)
Up	Aradu.NQ8T0	30S ribosomal protein S14%2C chloroplastic n%3D2 Tax%3DMesangiospermae RepID%3DR9ZTX7_GLYTO%3B IPR001209 (Ribosomal protein S14)%3B GO:0003735 (structural constituent of ribosome)%2C GO:0005622 (intracellular)%2C GO:0005840 (ribosome)%2C GO:0006412 (translation)
Up	Aradu.KI3D9	30S ribosomal protein S14%2C chloroplastic n%3D2 Tax%3DMesangiospermae RepID%3DR9ZTX7_GLYTO%3B IPR001209 (Ribosomal protein S14)%3B GO:0003735 (structural constituent of ribosome)%2C GO:0005622 (intracellular)%2C GO:0005840 (ribosome)%2C GO:0006412 (translation)
Up	Araip.45AJT	30S ribosomal protein S14%2C chloroplastic n%3D7 Tax%3DMesangiospermae RepID%3DRR14_LEMMI%3B IPR001209 (Ribosomal protein S14)%3B GO:0003735 (structural constituent of ribosome)%2C GO:0005622 (intracellular)%2C GO:0005840 (ribosome)%2C GO:0006412 (translation)
Up	Aradu.IZ11Y	30S ribosomal protein%2C putative%3B IPR003489 (Ribosomal protein S30Ae/sigma 54 modulation protein)%3B GO:0044238 (primary metabolic process)
Down	Aradu.I9RLC	3-dehydroquinate synthase%2C putative%3B IPR016037 (3-dehydroquinate synthase AroB)%3B GO:0003856 (3-dehydroquinate synthase activity)%2C GO:0005737 (cytoplasm)%2C GO:0009073 (aromatic amino acid family biosynthetic process)
Up	Aradu.KI06N	3-deoxy-7-phosphoheptulonate synthase (Phospho-2-dehydro-3-deoxyheptonate aldolase) (DAHP synthetase class II) n%3D1 Tax%3DMagnetospirillum RepID%3DW6K5D4_9PROT%3B IPR002480 (DAHP synthetase%2C class II)%3B GO:0003849 (3-deoxy-7-phosphoheptulonate synthase activity)%2C GO:0009073 (aromatic amino acid family biosynthetic process)
Down	Aradu.PP8TF	3-deoxy-7-phosphoheptulonate synthase (Phospho-2-dehydro-3-deoxyheptonate aldolase) n%3D163 Tax%3DPseudomonas RepID%3DF2K9C2_PSEBN%3B IPR002480 (DAHP synthetase%2C class II)%3B GO:0003849 (3-deoxy-7-phosphoheptulonate synthase activity)%2C GO:0009073 (aromatic amino acid family biosynthetic process)
Down	Araip.0C8X4	3-deoxy-7-phosphoheptulonate synthase (Phospho-2-dehydro-3-deoxyheptonate aldolase) n%3D163 Tax%3DPseudomonas RepID%3DF2K9C2_PSEBN%3B IPR002480 (DAHP synthetase%2C class II)%3B GO:0003849 (3-deoxy-7-phosphoheptulonate synthase activity)%2C GO:0009073 (aromatic amino acid family biosynthetic process)
Up	Aradu.MSQ8X	3-hydroxyacyl-[acyl-carrier-protein] dehydratase FabZ n%3D2 Tax%3DSynechococcus RepID%3DFABZ_SYNJA%3B IPR010084 (Beta-hydroxyacyl-(acyl-carrier-protein) dehydratase FabZ)%3B GO:0005737 (cytoplasm)%2C GO:0006633 (fatty acid biosynthetic process)%2C GO:0016836 (hydro-lyase activity)
Up	Aradu.Z3MEQ	3-hydroxyacyl-CoA dehydrogenase family protein%3B IPR001753 (Crotonase superfamily)%2C IPR008927 (6-phosphogluconate dehydrogenase%2C C-terminal-like)%2C IPR016040 (NAD(P)-binding domain)%3B GO:0003824 (catalytic activity)%2C GO:0003857 (3-hydroxyacyl-CoA dehydrogenase activity)%2C GO:0006631 (fatty acid metabolic process)%2C GO:0008152 (metabolic process)%2C GO:0016491 (oxidoreductase activity)%…
Down	Aradu.HK5Y3	3-ketoacyl-CoA synthase 1%3B IPR012392 (Very-long-chain 3-ketoacyl-CoA synthase)%2C IPR016039 (Thiolase-like)%3B GO:0003824 (catalytic activity)%2C GO:0006633 (fatty acid biosynthetic process)%2C GO:0008152 (metabolic process)%2C GO:0008610 (lipid biosynthetic process)%2C GO:0016020 (membrane)
Down	Araip.UZ0KD	3-ketoacyl-CoA synthase 12%3B IPR012392 (Very-long-chain 3-ketoacyl-CoA synthase)%2C IPR016039 (Thiolase-like)%3B GO:0003824 (catalytic activity)%2C GO:0006633 (fatty acid biosynthetic process)%2C GO:0008152 (metabolic process)%2C GO:0008610 (lipid biosynthetic process)%2C GO:0016020 (membrane)
Down	Araip.NUL7W	3-ketodihydrosphingosine reductase-like protein%3B IPR002198 (Short-chain dehydrogenase/reductase SDR)%3B GO:0008152 (metabolic process)%2C GO:0016491 (oxidoreductase activity)
Up	Aradu.DUW28	3-oxo-5-alpha-steroid 4-dehydrogenase family protein
Up	Aradu.LBZ6D	3-oxo-delta(4%2C5)-steroid 5-beta-reductase-like protein%3B IPR016040 (NAD(P)-binding domain)
Down	Aradu.79NM3	40s ribosomal protein SA%3B IPR001865 (Ribosomal protein S2)%2C IPR023591 (Ribosomal protein S2%2C flavodoxin-like domain)%3B GO:0003735 (structural constituent of ribosome)%2C GO:0005622 (intracellular)%2C GO:0005840 (ribosome)%2C GO:0006412 (translation)%2C GO:0015935 (small ribosomal subunit)
Up	Aradu.99AQ5	4-coumarate:CoA ligase 2%3B IPR000873 (AMP-dependent synthetase/ligase)%2C IPR025110 (AMP-binding enzyme C-terminal domain)%3B GO:0003824 (catalytic activity)%2C GO:0008152 (metabolic process)
Down	Aradu.B7Z5E	4-hydroxy-3-methylbut-2-enyl diphosphate synthase%3B IPR004588 (4-hydroxy-3-methylbut-2-en-1-yl diphosphate synthase%2C bacterial-type)%3B GO:0005506 (iron ion binding)%2C GO:0008299 (isoprenoid biosynthetic process)%2C GO:0016114 (terpenoid biosynthetic process)%2C GO:0046429 (4-hydroxy-3-methylbut-2-en-1-yl diphosphate synthase activity)%2C GO:0055114 (oxidation-reduction process)
Up	Aradu.CZP85	50S ribosomal protein L15%3B IPR005749 (Ribosomal protein L15%2C bacterial-type)%2C IPR021131 (Ribosomal protein L18e/L15P)%3B GO:0003735 (structural constituent of ribosome)%2C GO:0006412 (translation)%2C GO:0015934 (large ribosomal subunit)
Up	Aradu.VA9EI	50S ribosomal protein L15%3B IPR005749 (Ribosomal protein L15%2C bacterial-type)%2C IPR021131 (Ribosomal protein L18e/L15P)%3B GO:0003735 (structural constituent of ribosome)%2C GO:0006412 (translation)%2C GO:0015934 (large ribosomal subunit)
Down	Araip.WEA5L	50S ribosomal protein L16%3B IPR000114 (Ribosomal protein L16)%2C IPR000218 (Ribosomal protein L14b/L23e)%2C IPR000630 (Ribosomal protein S8)%2C IPR016180 (Ribosomal protein L10e/L16)%2C IPR023571 (Ribosomal protein L14 domain)%3B GO:0003735 (structural constituent of ribosome)%2C GO:0005840 (ribosome)%2C GO:0006412 (translation)%2C GO:0019843 (rRNA binding)
Down	Aradu.11P9Q	50S ribosomal protein L16%3B IPR000114 (Ribosomal protein L16)%2C IPR000218 (Ribosomal protein L14b/L23e)%2C IPR016180 (Ribosomal protein L10e/L16)%2C IPR023571 (Ribosomal protein L14 domain)%3B GO:0003735 (structural constituent of ribosome)%2C GO:0005622 (intracellular)%2C GO:0005840 (ribosome)%2C GO:0006412 (translation)%2C GO:0019843 (rRNA binding)
Up	Araip.JBD0U	50S ribosomal protein L18%3B IPR005484 (Ribosomal protein L18/L5)%3B GO:0003735 (structural constituent of ribosome)%2C GO:0005622 (intracellular)%2C GO:0005840 (ribosome)%2C GO:0006412 (translation)
Up	Aradu.270YY	50S ribosomal protein L35%3B IPR021137 (Ribosomal protein L35)%3B GO:0003735 (structural constituent of ribosome)%2C GO:0005622 (intracellular)%2C GO:0005840 (ribosome)%2C GO:0006412 (translation)
Differentially expressed genes
The change of S1 relative to S2	gene ID	gene annotation
Down	Aradu.NKE3U	5-methyltetrahydropteroyltriglutamate--homocysteine methyltransferase n%3D2 Tax%3DAlcaligenes RepID%3DM5J2G5_9BURK%3B IPR006276 (Cobalamin-independent methionine synthase)%3B GO:0003871 (5-methyltetrahydropteroyltriglutamate-homocysteine S-methyltransferase activity)%2C GO:0008270 (zinc ion binding)%2C GO:0008652 (cellular amino acid biosynthetic process)%2C GO:0009086 (methionine biosynthetic pr…
Up	Aradu.H0LHR	60S ribosomal protein L10 [Glycine max]%3B IPR001197 (Ribosomal protein L10e)%2C IPR016180 (Ribosomal protein L10e/L16)%3B GO:0003735 (structural constituent of ribosome)%2C GO:0005622 (intracellular)%2C GO:0005840 (ribosome)%2C GO:0006412 (translation)
Up	Aradu.87U6U	6b-interacting protein 2 n%3D1 Tax%3DNicotiana tabacum RepID%3DB1B5X5_TOBAC
Down	Aradu.4Z7N1	6-phosphogluconate dehydrogenase family protein%3B IPR006113 (6-phosphogluconate dehydrogenase%2C decarboxylating)%2C IPR008927 (6-phosphogluconate dehydrogenase%2C C-terminal-like)%2C IPR016040 (NAD(P)-binding domain)%3B GO:0004616 (phosphogluconate dehydrogenase (decarboxylating) activity)%2C GO:0006098 (pentose-phosphate shunt)%2C GO:0016491 (oxidoreductase activity)%2C GO:0050661 (NADP bindin…
Down	Araip.H6PIB	6-phosphogluconate dehydrogenase family protein%3B IPR006113 (6-phosphogluconate dehydrogenase%2C decarboxylating)%2C IPR008927 (6-phosphogluconate dehydrogenase%2C C-terminal-like)%2C IPR016040 (NAD(P)-binding domain)%3B GO:0004616 (phosphogluconate dehydrogenase (decarboxylating) activity)%2C GO:0006098 (pentose-phosphate shunt)%2C GO:0016491 (oxidoreductase activity)%2C GO:0050661 (NADP bindin…
Down	Aradu.8XX6M	6-phosphogluconate dehydrogenase family protein%3B IPR006113 (6-phosphogluconate dehydrogenase%2C decarboxylating)%2C IPR008927 (6-phosphogluconate dehydrogenase%2C C-terminal-like)%2C IPR016040 (NAD(P)-binding domain)%3B GO:0004616 (phosphogluconate dehydrogenase (decarboxylating) activity)%2C GO:0006098 (pentose-phosphate shunt)%2C GO:0016491 (oxidoreductase activity)%2C GO:0050661 (NADP bindin…
Up	Aradu.SGN54	ABC transporter family protein%3B IPR011527 (ABC transporter type 1%2C transmembrane domain)%3B GO:0005524 (ATP binding)%2C GO:0006810 (transport)%2C GO:0016021 (integral component of membrane)%2C GO:0055085 (transmembrane transport)
Down	Aradu.X8N4Z	ABC transporter family protein%3B IPR027417 (P-loop containing nucleoside triphosphate hydrolase)%3B GO:0005524 (ATP binding)%2C GO:0016887 (ATPase activity)
Down	Araip.R3CRX	ABC transporter-related%3B IPR013525 (ABC-2 type transporter)%2C IPR027417 (P-loop containing nucleoside triphosphate hydrolase)%3B GO:0005524 (ATP binding)%2C GO:0016020 (membrane)%2C GO:0016887 (ATPase activity)
Up	Aradu.JH4LG	ABC-type Co2+ transport system%2C permease component n%3D1 Tax%3DZea mays RepID%3DB6U434_MAIZE%3B IPR021855 (Protein of unknown function DUF3464)
Down	Araip.DZ7SB	abnormal spindle-like microcephaly-associated protein homolog isoform X3 [Glycine max]%3B IPR000048 (IQ motif%2C EF-hand binding site)%2C IPR001715 (Calponin homology domain)%2C IPR027417 (P-loop containing nucleoside triphosphate hydrolase)%3B GO:0005515 (protein binding)
Up	Araip.8DG38	Acetyl-coenzyme A carboxylase carboxyl transferase subunit beta%2C chloroplastic n%3D35 Tax%3DMesangiospermae RepID%3DD3WBE7_9AQUA
Up	Aradu.B8Y6C	Acetyl-coenzyme A carboxylase carboxyl transferase subunit beta%2C chloroplastic n%3D35 Tax%3DMesangiospermae RepID%3DD3WBE7_9AQUA%3B IPR000438 (Acetyl-CoA carboxylase carboxyl transferase%2C beta subunit)%3B GO:0003989 (acetyl-CoA carboxylase activity)%2C GO:0006633 (fatty acid biosynthetic process)%2C GO:0009317 (acetyl-CoA carboxylase complex)%2C GO:0016874 (ligase activity)
Up	Aradu.NZ9G2	Acetyl-coenzyme A carboxylase carboxyl transferase subunit beta%2C chloroplastic n%3D35 Tax%3DMesangiospermae RepID%3DD3WBE7_9AQUA%3B IPR000438 (Acetyl-CoA carboxylase carboxyl transferase%2C beta subunit)%3B GO:0003989 (acetyl-CoA carboxylase activity)%2C GO:0006633 (fatty acid biosynthetic process)%2C GO:0009317 (acetyl-CoA carboxylase complex)%2C GO:0016874 (ligase activity)
Up	Aradu.Q0MB8	acetyltransferase (GNAT) domain protein%3B IPR016181 (Acyl-CoA N-acyltransferase)%3B GO:0008080 (N-acetyltransferase activity)
Down	Aradu.IKW1T	acetyltransferase (GNAT) domain protein%3B IPR016181 (Acyl-CoA N-acyltransferase)%3B GO:0008080 (N-acetyltransferase activity)
Down	Araip.U29VB	ACT domain repeat 8%3B IPR002912 (ACT domain)%3B GO:0008152 (metabolic process)%2C GO:0016597 (amino acid binding)
Down	Aradu.K23U3	ACT domain repeat 8%3B IPR002912 (ACT domain)%3B GO:0008152 (metabolic process)%2C GO:0016597 (amino acid binding)
Down	Aradu.C0D4L	Actin binding protein%2C putative n%3D1 Tax%3DRicinus communis RepID%3DB9SA03_RICCO%3B IPR015425 (Formin%2C FH2 domain)%2C IPR027643 (Formin-like family%2C plant)%3B GO:0005884 (actin filament)%2C GO:0045010 (actin nucleation)
Down	Araip.839KU	Actin binding protein%2C putative n%3D1 Tax%3DRicinus communis RepID%3DB9SA03_RICCO%3B IPR015425 (Formin%2C FH2 domain)%2C IPR027643 (Formin-like family%2C plant)%3B GO:0005884 (actin filament)%2C GO:0045010 (actin nucleation)
Up	Aradu.F8CK0	actin depolymerizing factor 1%3B IPR002108 (Actin-depolymerising factor homology domain)%2C IPR017904 (ADF/Cofilin/Destrin)%3B GO:0003779 (actin binding)%2C GO:0005622 (intracellular)%2C GO:0015629 (actin cytoskeleton)%2C GO:0030042 (actin filament depolymerization)
Down	Aradu.45CR1	actin-binding FH2 (formin 2) family protein%3B IPR000008 (C2 domain)%2C IPR015425 (Formin%2C FH2 domain)%2C IPR027643 (Formin-like family%2C plant)%3B GO:0005515 (protein binding)%2C GO:0005884 (actin filament)%2C GO:0045010 (actin nucleation)
Up	Aradu.AY0CP	acyl carrier protein 4%3B IPR009081 (Acyl carrier protein-like)
Down	Aradu.B4Z82	acyl thioesterase-like protein%3B IPR003140 (Phospholipase/carboxylesterase/thioesterase)%3B GO:0016787 (hydrolase activity)
Up	Aradu.R77UT	Acyl-CoA N-acyltransferases (NAT) superfamily protein%3B IPR016181 (Acyl-CoA N-acyltransferase)%3B GO:0008080 (N-acetyltransferase activity)
Down	Aradu.2Z71Q	Acyl-CoA N-acyltransferases (NAT) superfamily protein%3B IPR016181 (Acyl-CoA N-acyltransferase)%3B GO:0008080 (N-acetyltransferase activity)
Down	Aradu.FXS1X	acyl-CoA oxidase 1%3B IPR009075 (Acyl-CoA dehydrogenase/oxidase C-terminal)%2C IPR012258 (Acyl-CoA oxidase)%2C IPR013786 (Acyl-CoA dehydrogenase/oxidase%2C N-terminal)%3B GO:0003995 (acyl-CoA dehydrogenase activity)%2C GO:0003997 (acyl-CoA oxidase activity)%2C GO:0005777 (peroxisome)%2C GO:0006631 (fatty acid metabolic process)%2C GO:0006635 (fatty acid beta-oxidation)%2C GO:0008152 (metabolic pr…
Up	Aradu.URD4R	acyl-CoA oxidase 3%3B IPR009075 (Acyl-CoA dehydrogenase/oxidase C-terminal)%2C IPR012258 (Acyl-CoA oxidase)%3B GO:0003995 (acyl-CoA dehydrogenase activity)%2C GO:0003997 (acyl-CoA oxidase activity)%2C GO:0005777 (peroxisome)%2C GO:0006631 (fatty acid metabolic process)%2C GO:0006635 (fatty acid beta-oxidation)%2C GO:0008152 (metabolic process)%2C GO:0050660 (flavin adenine dinucleotide binding)%2…
Up	Araip.SV2QM	acyl-CoA oxidase 3%3B IPR009075 (Acyl-CoA dehydrogenase/oxidase C-terminal)%2C IPR012258 (Acyl-CoA oxidase)%3B GO:0003995 (acyl-CoA dehydrogenase activity)%2C GO:0003997 (acyl-CoA oxidase activity)%2C GO:0005777 (peroxisome)%2C GO:0006631 (fatty acid metabolic process)%2C GO:0006635 (fatty acid beta-oxidation)%2C GO:0008152 (metabolic process)%2C GO:0050660 (flavin adenine dinucleotide binding)%2…
Up	Aradu.D1CUJ	acyl-CoA synthetase 5%3B IPR000873 (AMP-dependent synthetase/ligase)%2C IPR025110 (AMP-binding enzyme C-terminal domain)%3B GO:0003824 (catalytic activity)%2C GO:0008152 (metabolic process)
Down	Aradu.V73WK	acyl-CoA synthetase 5%3B IPR000873 (AMP-dependent synthetase/ligase)%2C IPR025110 (AMP-binding enzyme C-terminal domain)%3B GO:0003824 (catalytic activity)%2C GO:0008152 (metabolic process)
Down	Aradu.N3SPH	acyl-CoA synthetase 5%3B IPR000873 (AMP-dependent synthetase/ligase)%2C IPR025110 (AMP-binding enzyme C-terminal domain)%3B GO:0003824 (catalytic activity)%2C GO:0008152 (metabolic process)
Down	Araip.8S2L3	acyl-CoA-binding domain protein
Down	Aradu.S13AZ	Adenine nucleotide alpha hydrolases-like superfamily protein%3B IPR014729 (Rossmann-like alpha/beta/alpha sandwich fold)%3B GO:0006950 (response to stress)
Down	Araip.PG020	Adenosylmethionine decarboxylase family protein%3B IPR001985 (S-adenosylmethionine decarboxylase)%2C IPR016067 (S-adenosylmethionine decarboxylase%2C core)%3B GO:0004014 (adenosylmethionine decarboxylase activity)%2C GO:0006597 (spermine biosynthetic process)%2C GO:0008295 (spermidine biosynthetic process)
Up	Aradu.QD850	ADP-ribosylation factor 1%3B IPR005225 (Small GTP-binding protein domain)%2C IPR006689 (Small GTPase superfamily%2C ARF/SAR type)%2C IPR027417 (P-loop containing nucleoside triphosphate hydrolase)%3B GO:0005525 (GTP binding)%2C GO:0005622 (intracellular)%2C GO:0006886 (intracellular protein transport)%2C GO:0007264 (small GTPase mediated signal transduction)
Up	Araip.Y8WFU	ADP-ribosylation factor 1%3B IPR005225 (Small GTP-binding protein domain)%2C IPR006689 (Small GTPase superfamily%2C ARF/SAR type)%2C IPR027417 (P-loop containing nucleoside triphosphate hydrolase)%3B GO:0005525 (GTP binding)%2C GO:0005622 (intracellular)%2C GO:0006886 (intracellular protein transport)%2C GO:0007264 (small GTPase mediated signal transduction)
Down	Aradu.W1519	ADP-ribosylation factor GTPase-activating protein AGD3-like [Glycine max]%3B IPR001164 (Arf GTPase activating protein)%2C IPR011993 (Pleckstrin homology-like domain)%2C IPR020683 (Ankyrin repeat-containing domain)%2C IPR027267 (Arfaptin homology (AH) domain/BAR domain)%3B GO:0005515 (protein binding)%2C GO:0005737 (cytoplasm)%2C GO:0008060 (ARF GTPase activator activity)%2C GO:0008270 (zinc ion b…
Down	Aradu.P759U	alcohol dehydrogenase 1%3B IPR002085 (Alcohol dehydrogenase superfamily%2C zinc-type)%2C IPR011032 (GroES (chaperonin 10)-like)%2C IPR013149 (Alcohol dehydrogenase%2C C-terminal)%2C IPR016040 (NAD(P)-binding domain)%3B GO:0008270 (zinc ion binding)%2C GO:0016491 (oxidoreductase activity)%2C GO:0055114 (oxidation-reduction process)
Up	Aradu.FS1YY	alcohol dehydrogenase 1%3B IPR002085 (Alcohol dehydrogenase superfamily%2C zinc-type)%2C IPR011032 (GroES (chaperonin 10)-like)%2C IPR016040 (NAD(P)-binding domain)%3B GO:0008270 (zinc ion binding)%2C GO:0016491 (oxidoreductase activity)%2C GO:0055114 (oxidation-reduction process)
Up	Araip.EBX1A	alcohol dehydrogenase 1%3B IPR002085 (Alcohol dehydrogenase superfamily%2C zinc-type)%2C IPR011032 (GroES (chaperonin 10)-like)%2C IPR016040 (NAD(P)-binding domain)%3B GO:0008270 (zinc ion binding)%2C GO:0016491 (oxidoreductase activity)%2C GO:0055114 (oxidation-reduction process)
Up	Aradu.27EBR	alcohol dehydrogenase 1%3B IPR002085 (Alcohol dehydrogenase superfamily%2C zinc-type)%2C IPR013149 (Alcohol dehydrogenase%2C C-terminal)%2C IPR016040 (NAD(P)-binding domain)%3B GO:0008270 (zinc ion binding)%2C GO:0016491 (oxidoreductase activity)%2C GO:0055114 (oxidation-reduction process)
Up	Aradu.Y1FV5	alcohol dehydrogenase 1%3B IPR002085 (Alcohol dehydrogenase superfamily%2C zinc-type)%2C IPR016040 (NAD(P)-binding domain)%2C IPR020843 (Polyketide synthase%2C enoylreductase)%3B GO:0008270 (zinc ion binding)%2C GO:0016491 (oxidoreductase activity)%2C GO:0055114 (oxidation-reduction process)
Down	Aradu.F6C6R	alcohol dehydrogenase 1%3B IPR002085 (Alcohol dehydrogenase superfamily%2C zinc-type)%2C IPR016040 (NAD(P)-binding domain)%2C IPR020843 (Polyketide synthase%2C enoylreductase)%3B GO:0008270 (zinc ion binding)%2C GO:0016491 (oxidoreductase activity)%2C GO:0055114 (oxidation-reduction process)
Up	Araip.C9VD3	alcohol dehydrogenase 1%3B IPR016040 (NAD(P)-binding domain)
Up	Aradu.F2VIG	aldehyde dehydrogenase family 2 member C4-like [Glycine max]%3B IPR016161 (Aldehyde/histidinol dehydrogenase)%3B GO:0008152 (metabolic process)%2C GO:0016491 (oxidoreductase activity)%2C GO:0055114 (oxidation-reduction process)
Up	Aradu.I79F7	aldehyde dehydrogenase family 2 member C4-like [Glycine max]%3B IPR016161 (Aldehyde/histidinol dehydrogenase)%3B GO:0008152 (metabolic process)%2C GO:0016491 (oxidoreductase activity)%2C GO:0055114 (oxidation-reduction process)
Down	Aradu.DAT06	aldehyde dehydrogenase family 2 member C4-like [Glycine max]%3B IPR016161 (Aldehyde/histidinol dehydrogenase)%3B GO:0008152 (metabolic process)%2C GO:0016491 (oxidoreductase activity)%2C GO:0055114 (oxidation-reduction process)
Down	Aradu.MTS9G	aldehyde dehydrogenase family 2 member C4-like [Glycine max]%3B IPR016161 (Aldehyde/histidinol dehydrogenase)%3B GO:0008152 (metabolic process)%2C GO:0016491 (oxidoreductase activity)%2C GO:0055114 (oxidation-reduction process)
Up	Aradu.110X4	aldehyde dehydrogenase family 3 member F1-like [Glycine max]%3B IPR012394 (Aldehyde dehydrogenase NAD(P)-dependent)%2C IPR016161 (Aldehyde/histidinol dehydrogenase)%3B GO:0004030 (aldehyde dehydrogenase [NAD(P)+] activity)%2C GO:0006081 (cellular aldehyde metabolic process)%2C GO:0008152 (metabolic process)%2C GO:0016491 (oxidoreductase activity)%2C GO:0055114 (oxidation-reduction process)
Up	Aradu.4V4IS	aldehyde dehydrogenase family 3 member F1-like [Glycine max]%3B IPR012394 (Aldehyde dehydrogenase NAD(P)-dependent)%2C IPR016161 (Aldehyde/histidinol dehydrogenase)%3B GO:0004030 (aldehyde dehydrogenase [NAD(P)+] activity)%2C GO:0006081 (cellular aldehyde metabolic process)%2C GO:0008152 (metabolic process)%2C GO:0016491 (oxidoreductase activity)%2C GO:0055114 (oxidation-reduction process)
Up	Araip.H8KV6	aldehyde dehydrogenase family 3 member F1-like [Glycine max]%3B IPR012394 (Aldehyde dehydrogenase NAD(P)-dependent)%2C IPR016161 (Aldehyde/histidinol dehydrogenase)%3B GO:0004030 (aldehyde dehydrogenase [NAD(P)+] activity)%2C GO:0006081 (cellular aldehyde metabolic process)%2C GO:0008152 (metabolic process)%2C GO:0016491 (oxidoreductase activity)%2C GO:0055114 (oxidation-reduction process)
Up	Aradu.8BQ4V	aldehyde dehydrogenase family 3 member F1-like [Glycine max]%3B IPR012394 (Aldehyde dehydrogenase NAD(P)-dependent)%2C IPR016161 (Aldehyde/histidinol dehydrogenase)%3B GO:0004030 (aldehyde dehydrogenase [NAD(P)+] activity)%2C GO:0006081 (cellular aldehyde metabolic process)%2C GO:0008152 (metabolic process)%2C GO:0016491 (oxidoreductase activity)%2C GO:0055114 (oxidation-reduction process)
Down	Aradu.ZIF6R	aldehyde dehydrogenase family 3 member H1-like [Glycine max]%3B IPR012394 (Aldehyde dehydrogenase NAD(P)-dependent)%2C IPR016161 (Aldehyde/histidinol dehydrogenase)%3B GO:0004030 (aldehyde dehydrogenase [NAD(P)+] activity)%2C GO:0006081 (cellular aldehyde metabolic process)%2C GO:0008152 (metabolic process)%2C GO:0016491 (oxidoreductase activity)%2C GO:0055114 (oxidation-reduction process)
Up	Aradu.WBT61	aldehyde dehydrogenase family 7 member A1-like [Glycine max]%3B IPR016161 (Aldehyde/histidinol dehydrogenase)%3B GO:0008152 (metabolic process)%2C GO:0016491 (oxidoreductase activity)%2C GO:0055114 (oxidation-reduction process)
Up	Araip.UP04B	aldehyde dehydrogenase family 7 member A1-like [Glycine max]%3B IPR016161 (Aldehyde/histidinol dehydrogenase)%3B GO:0008152 (metabolic process)%2C GO:0016491 (oxidoreductase activity)%2C GO:0055114 (oxidation-reduction process)
Down	Araip.39YN9	aldo/keto reductase family oxidoreductase%3B IPR001395 (Aldo/keto reductase)%2C IPR023210 (NADP-dependent oxidoreductase domain)
Down	Aradu.AN030	aldo/keto reductase family oxidoreductase%3B IPR001395 (Aldo/keto reductase)%2C IPR023210 (NADP-dependent oxidoreductase domain)
Up	Aradu.8W8ZB	aldo/keto reductase family oxidoreductase%3B IPR001395 (Aldo/keto reductase)%2C IPR023210 (NADP-dependent oxidoreductase domain)%3B GO:0016491 (oxidoreductase activity)%2C GO:0055114 (oxidation-reduction process)
Up	Aradu.X6EP2	aldo/keto reductase family oxidoreductase%3B IPR001395 (Aldo/keto reductase)%2C IPR023210 (NADP-dependent oxidoreductase domain)%3B GO:0016491 (oxidoreductase activity)%2C GO:0055114 (oxidation-reduction process)
Up	Araip.85GE6	aldose 1-epimerase [Glycine max]%3B IPR008183 (Aldose 1-/Glucose-6-phosphate 1-epimerase)%2C IPR011013 (Galactose mutarotase-like domain)%3B GO:0003824 (catalytic activity)%2C GO:0005975 (carbohydrate metabolic process)%2C GO:0016853 (isomerase activity)%2C GO:0019318 (hexose metabolic process)%2C GO:0030246 (carbohydrate binding)
Up	Aradu.MH1AP	aldose 1-epimerase [Glycine max]%3B IPR008183 (Aldose 1-/Glucose-6-phosphate 1-epimerase)%2C IPR011013 (Galactose mutarotase-like domain)%3B GO:0003824 (catalytic activity)%2C GO:0005975 (carbohydrate metabolic process)%2C GO:0016853 (isomerase activity)%2C GO:0019318 (hexose metabolic process)%2C GO:0030246 (carbohydrate binding)
Down	Aradu.VPR7N	ALG-2 interacting protein X-like [Glycine max]%3B IPR004328 (BRO1 domain)
Up	Aradu.RFT1Y	Alkyl hydroperoxide reductase Thiol specific antioxidant Mal allergen and Peroxiredoxin domain containing protein n%3D4 Tax%3DStrongylida RepID%3DU6NTW3_HAECO%3B IPR012336 (Thioredoxin-like fold)%3B GO:0016209 (antioxidant activity)%2C GO:0016491 (oxidoreductase activity)%2C GO:0051920 (peroxiredoxin activity)%2C GO:0055114 (oxidation-reduction process)
Up	Aradu.2W10M	Alkyl hydroperoxide reductase/ Thiol specific antioxidant/ Mal allergen n%3D1 Tax%3DKrokinobacter sp. (strain 4H-3-7-5) RepID%3DF4AXI1_KROS4%3B IPR012336 (Thioredoxin-like fold)%3B GO:0016209 (antioxidant activity)%2C GO:0016491 (oxidoreductase activity)%2C GO:0055114 (oxidation-reduction process)
Up	Aradu.72HG2	allene oxide synthase%3B IPR001128 (Cytochrome P450)%3B GO:0005506 (iron ion binding)%2C GO:0020037 (heme binding)%2C GO:0055114 (oxidation-reduction process)
Down	Aradu.88UWV	alpha carbonic anhydrase 7%3B IPR001148 (Alpha carbonic anhydrase)%2C IPR023561 (Carbonic anhydrase%2C alpha-class)
Up	Aradu.M1DIQ	alpha/beta fold hydrolase
Up	Aradu.0H9WK	alpha/beta fold hydrolase%3B IPR000073 (Alpha/beta hydrolase fold-1)
Up	Aradu.U1CK3	alpha/beta fold hydrolase%3B IPR000073 (Alpha/beta hydrolase fold-1)
Up	Aradu.Y681G	alpha/beta fold hydrolase%3B IPR016969 (Uncharacterised conserved protein UCP031088%2C alpha/beta hydrolase%2C At1g15070)
Down	Aradu.X3XEZ	Alpha/beta hydrolase related protein%3B IPR000639 (Epoxide hydrolase-like)%3B GO:0003824 (catalytic activity)
Down	Aradu.ZC0IU	alpha/beta-hydrolase superfamily protein%3B IPR000073 (Alpha/beta hydrolase fold-1)
Down	Araip.W8Y03	alpha/beta-hydrolase superfamily protein%3B IPR000073 (Alpha/beta hydrolase fold-1)
Up	Araip.I4JXQ	alpha/beta-hydrolase superfamily protein%3B IPR007751 (Domain of unknown function DUF676%2C lipase-like)
Down	Araip.2Q08B	alpha/beta-Hydrolases superfamily protein
Down	Aradu.8Z4L7	alpha/beta-Hydrolases superfamily protein%3B IPR000073 (Alpha/beta hydrolase fold-1)
Down	Aradu.SYE5N	alpha/beta-Hydrolases superfamily protein%3B IPR000073 (Alpha/beta hydrolase fold-1)%2C IPR000639 (Epoxide hydrolase-like)%3B GO:0003824 (catalytic activity)
Up	Aradu.Z61UP	alpha/beta-Hydrolases superfamily protein%3B IPR002921 (Lipase%2C class 3)%3B GO:0004806 (triglyceride lipase activity)%2C GO:0006629 (lipid metabolic process)
Down	Aradu.BI3D1	alpha-1%2C4-glucan-protein synthase [UDP-forming]-like protein%3B IPR004901 (Reversibly glycosylated polypeptide family)%3B GO:0016866 (intramolecular transferase activity)%2C GO:0030244 (cellulose biosynthetic process)
Down	Araip.B3G7V	alpha-1%2C4-glucan-protein synthase [UDP-forming]-like protein%3B IPR004901 (Reversibly glycosylated polypeptide family)%3B GO:0016866 (intramolecular transferase activity)%2C GO:0030244 (cellulose biosynthetic process)
Up	Aradu.U0FIP	Alpha-1%2C6-glucosidase%2C pullulanase-type n%3D2 Tax%3DStreptomyces RepID%3DG2P8U7_STRVO%3B IPR011839 (Alpha-1%2C6-glucosidases%2C pullulanase-type)%2C IPR013783 (Immunoglobulin-like fold)%2C IPR015902 (Glycoside hydrolase%2C family 13)%2C IPR017853 (Glycoside hydrolase%2C superfamily)%2C IPR024561 (Alpha-1%2C6-glucosidases%2C pullulanase-type%2C C-terminal)%3B GO:0003824 (catalytic activity)%2C…
Down	Aradu.6G91H	alpha-glucosidase%3B IPR000322 (Glycoside hydrolase%2C family 31)%2C IPR011013 (Galactose mutarotase-like domain)%2C IPR013785 (Aldolase-type TIM barrel)%3B GO:0003824 (catalytic activity)%2C GO:0005975 (carbohydrate metabolic process)%2C GO:0030246 (carbohydrate binding)
Down	Aradu.4R69H	alpha-glucosidase%3B IPR000322 (Glycoside hydrolase%2C family 31)%2C IPR011013 (Galactose mutarotase-like domain)%3B GO:0003824 (catalytic activity)%2C GO:0005975 (carbohydrate metabolic process)%2C GO:0030246 (carbohydrate binding)
Down	Aradu.J8VZJ	alpha-L-arabinofuranosidase 1%3B IPR010720 (Alpha-L-arabinofuranosidase%2C C-terminal)%2C IPR017853 (Glycoside hydrolase%2C superfamily)%3B GO:0046373 (L-arabinose metabolic process)%2C GO:0046556 (alpha-N-arabinofuranosidase activity)
Up	Aradu.D85KR	alpha-L-fucosidase 1%3B IPR000933 (Glycoside hydrolase%2C family 29)%2C IPR008979 (Galactose-binding domain-like)%2C IPR017853 (Glycoside hydrolase%2C superfamily)%3B GO:0004560 (alpha-L-fucosidase activity)%2C GO:0005975 (carbohydrate metabolic process)%2C GO:0006004 (fucose metabolic process)
Down	Araip.IQ4QZ	alternative oxidase 2%3B IPR002680 (Alternative oxidase)%3B GO:0009916 (alternative oxidase activity)%2C GO:0055114 (oxidation-reduction process)
Down	Aradu.D9WZF	alternative oxidase 2%3B IPR002680 (Alternative oxidase)%3B GO:0009916 (alternative oxidase activity)%2C GO:0055114 (oxidation-reduction process)
Down	Araip.AR4ND	Aluminium induced protein with YGL and LRDR motifs%3B IPR024286 (Domain of unknown function DUF3700)
Up	Aradu.1U9BT	Aluminium induced protein with YGL and LRDR motifs%3B IPR024286 (Domain of unknown function DUF3700)
Up	Araip.U9W9P	aluminum-activated malate transporter 9%3B IPR020966 (Aluminum-activated malate transporter)%3B GO:0015743 (malate transport)
Up	Aradu.42J3J	aluminum-activated malate transporter 9%3B IPR020966 (Aluminum-activated malate transporter)%3B GO:0015743 (malate transport)
Down	Aradu.Q0H7N	Amidase family protein%3B IPR000120 (Amidase)%2C IPR023631 (Amidase signature domain)
Up	Aradu.CMM2K	amine oxidase%3B IPR002937 (Amine oxidase)%3B GO:0016491 (oxidoreductase activity)%2C GO:0055114 (oxidation-reduction process)
Up	Aradu.VKM3T	Amino acid permease family protein%3B IPR002293 (Amino acid/polyamine transporter I)%3B GO:0003333 (amino acid transmembrane transport)%2C GO:0015171 (amino acid transmembrane transporter activity)%2C GO:0016020 (membrane)
Down	Araip.FK103	amino acid permease%3B IPR002293 (Amino acid/polyamine transporter I)%3B GO:0003333 (amino acid transmembrane transport)%2C GO:0006865 (amino acid transport)%2C GO:0015171 (amino acid transmembrane transporter activity)%2C GO:0016020 (membrane)%2C GO:0016021 (integral component of membrane)
Down	Aradu.DA1PG	amino acid permease%3B IPR002293 (Amino acid/polyamine transporter I)%3B GO:0003333 (amino acid transmembrane transport)%2C GO:0006865 (amino acid transport)%2C GO:0015171 (amino acid transmembrane transporter activity)%2C GO:0016020 (membrane)%2C GO:0016021 (integral component of membrane)
Down	Aradu.CGP4R	amino acid permease%3B IPR002293 (Amino acid/polyamine transporter I)%3B GO:0003333 (amino acid transmembrane transport)%2C GO:0015171 (amino acid transmembrane transporter activity)%2C GO:0016020 (membrane)
Down	Aradu.2V3YU	aminoacyl-tRNA synthetase%3B IPR004022 (DDT domain)
Down	Aradu.4Z62M	Aminotransferase-like protein n%3D1 Tax%3DOryza sativa subsp. japonica RepID%3DQ6K3L3_ORYSJ%3B IPR019557 (Aminotransferase-like%2C plant mobile domain)
Down	Aradu.KH25W	ammonium transporter 1%3B 4%3B IPR001905 (Ammonium transporter)%2C IPR024041 (Ammonium transporter AmtB-like domain)%3B GO:0008519 (ammonium transmembrane transporter activity)%2C GO:0015696 (ammonium transport)%2C GO:0016020 (membrane)%2C GO:0072488 (ammonium transmembrane transport)
Down	Aradu.DZ2GN	AMP deaminase-like [Glycine max]%3B IPR006329 (AMP deaminase)%3B GO:0003876 (AMP deaminase activity)%2C GO:0006188 (IMP biosynthetic process)%2C GO:0019239 (deaminase activity)
Up	Aradu.QS0SS	AMP-dependent synthetase and ligase family protein%3B IPR000873 (AMP-dependent synthetase/ligase)%2C IPR025110 (AMP-binding enzyme C-terminal domain)%3B GO:0003824 (catalytic activity)%2C GO:0008152 (metabolic process)
Down	Aradu.4XQ5D	anaphase-promoting complex subunit 5%3B IPR011990 (Tetratricopeptide-like helical)%2C IPR026000 (Apc5/TPR19 domain)%3B GO:0005515 (protein binding)
Down	Aradu.R35Q8	Ankyrin repeat family protein%3B IPR020683 (Ankyrin repeat-containing domain)%3B GO:0005515 (protein binding)
Up	Aradu.P9CN5	Ankyrin repeat family protein%3B IPR020683 (Ankyrin repeat-containing domain)%3B GO:0005515 (protein binding)
Up	Aradu.VQE1R	ankyrin repeat-containing protein [Glycine max]%3B IPR013083 (Zinc finger%2C RING/FYVE/PHD-type)%2C IPR020683 (Ankyrin repeat-containing domain)%3B GO:0005515 (protein binding)
Up	Araip.VSU1N	ankyrin repeat-containing protein [Glycine max]%3B IPR020683 (Ankyrin repeat-containing domain)%2C IPR026961 (PGG domain)%3B GO:0005515 (protein binding)
Down	Aradu.2DM5J	ankyrin repeat-containing protein [Glycine max]%3B IPR020683 (Ankyrin repeat-containing domain)%3B GO:0005515 (protein binding)
Up	Aradu.K3P5U	ankyrin repeat-containing protein 2%3B IPR016197 (Chromo domain-like)%2C IPR020683 (Ankyrin repeat-containing domain)%3B GO:0005515 (protein binding)
Down	Aradu.NP5V1	ankyrin repeat-containing protein At3g12360-like [Glycine max]%3B IPR020683 (Ankyrin repeat-containing domain)%2C IPR026961 (PGG domain)
Up	Aradu.L49GZ	ankyrin repeat-containing protein At5g02620-like isoform X3 [Glycine max]%3B IPR020683 (Ankyrin repeat-containing domain)%3B GO:0005515 (protein binding)
Up	Araip.7SW2Q	ankyrin repeat-containing protein At5g02620-like isoform X3 [Glycine max]%3B IPR026961 (PGG domain)
Up	Aradu.9BC7H	annexin 1%3B IPR001464 (Annexin)%3B GO:0005509 (calcium ion binding)%2C GO:0005544 (calcium-dependent phospholipid binding)
Down	Aradu.3L5NK	annexin 5%3B IPR001464 (Annexin)%3B GO:0005509 (calcium ion binding)%2C GO:0005544 (calcium-dependent phospholipid binding)
Up	Aradu.86DER	annexin 8%3B IPR001464 (Annexin)%3B GO:0005509 (calcium ion binding)%2C GO:0005544 (calcium-dependent phospholipid binding)
Up	Araip.R8WRM	annexin 8%3B IPR009118 (Annexin%2C plant)%3B GO:0005509 (calcium ion binding)%2C GO:0005544 (calcium-dependent phospholipid binding)
Up	Aradu.WJN5K	anthocyanidin synthase [Glycine max]%3B IPR005123 (Oxoglutarate/iron-dependent dioxygenase)%2C IPR026992 (Non-haem dioxygenase N-terminal domain)%2C IPR027443 (Isopenicillin N synthase-like)%3B GO:0016491 (oxidoreductase activity)%2C GO:0055114 (oxidation-reduction process)
Up	Aradu.HZK0U	anthranilate phosphoribosyltransferase%3B IPR005940 (Anthranilate phosphoribosyl transferase)%3B GO:0000162 (tryptophan biosynthetic process)%2C GO:0004048 (anthranilate phosphoribosyltransferase activity)%2C GO:0008152 (metabolic process)
Up	Aradu.A9U3A	anticodon-binding domain protein%3B IPR019181 (Anticodon-binding domain)
Down	Aradu.C5HAC	AP2-like ethylene-responsive transcription factor AIL1-like [Glycine max]%3B IPR016177 (DNA-binding domain)%3B GO:0003677 (DNA binding)%2C GO:0003700 (sequence-specific DNA binding transcription factor activity)
Up	Aradu.S9CWT	AP2-like ethylene-responsive transcription factor ANT-like [Glycine max]%3B IPR016177 (DNA-binding domain)%3B GO:0003677 (DNA binding)%2C GO:0003700 (sequence-specific DNA binding transcription factor activity)
Down	Aradu.PAN6G	appr-1-p processing enzyme family protein%3B IPR002589 (Macro domain)
Down	Araip.GHH45	apyrase 2%3B IPR000407 (Nucleoside phosphatase GDA1/CD39)%3B GO:0016787 (hydrolase activity)
Down	Aradu.Z4EVV	apyrase 2%3B IPR000407 (Nucleoside phosphatase GDA1/CD39)%3B GO:0016787 (hydrolase activity)
Down	Araip.FW8RP	arabinogalactan peptide 20-like [Glycine max]%3B IPR009424 (Arabinogalactan peptide%2C AGP)
Down	Aradu.G32SA	arabinogalactan peptide 20-like [Glycine max]%3B IPR009424 (Arabinogalactan peptide%2C AGP)
Up	Aradu.G97XD	arginine/serine-rich coiled coil protein
Down	Araip.8H3LV	arginine/serine-rich coiled coil protein
Up	Araip.5Q8D3	Argonaute family protein
Down	Aradu.6K97H	Argonaute family protein%3B IPR003100 (Argonaute/Dicer protein%2C PAZ domain)%2C IPR012337 (Ribonuclease H-like domain)%2C IPR014811 (Domain of unknown function DUF1785)%3B GO:0003676 (nucleic acid binding)%2C GO:0005515 (protein binding)
Down	Aradu.E98LA	Argonaute family protein%3B IPR003100 (Argonaute/Dicer protein%2C PAZ domain)%2C IPR012337 (Ribonuclease H-like domain)%2C IPR014811 (Domain of unknown function DUF1785)%3B GO:0003676 (nucleic acid binding)%2C GO:0005515 (protein binding)
Up	Aradu.A61Z4	ascorbate peroxidase 3%3B IPR010255 (Haem peroxidase)%3B GO:0004601 (peroxidase activity)%2C GO:0006979 (response to oxidative stress)%2C GO:0020037 (heme binding)%2C GO:0055114 (oxidation-reduction process)
Down	Aradu.50C9M	asparagine synthetase 3%3B IPR000583 (Class II glutamine amidotransferase domain)%2C IPR006426 (Asparagine synthase%2C glutamine-hydrolyzing)%3B GO:0004066 (asparagine synthase (glutamine-hydrolyzing) activity)%2C GO:0006529 (asparagine biosynthetic process)%2C GO:0008152 (metabolic process)
Up	Aradu.X1Y61	aspartate aminotransferase 1%3B IPR000796 (Aspartate/other aminotransferase)%2C IPR015424 (Pyridoxal phosphate-dependent transferase)%3B GO:0003824 (catalytic activity)%2C GO:0006520 (cellular amino acid metabolic process)%2C GO:0008483 (transaminase activity)%2C GO:0009058 (biosynthetic process)%2C GO:0030170 (pyridoxal phosphate binding)
Up	Aradu.W80F3	aspartate aminotransferase 3%3B IPR000796 (Aspartate/other aminotransferase)%2C IPR015424 (Pyridoxal phosphate-dependent transferase)%3B GO:0003824 (catalytic activity)%2C GO:0006520 (cellular amino acid metabolic process)%2C GO:0008483 (transaminase activity)%2C GO:0009058 (biosynthetic process)%2C GO:0030170 (pyridoxal phosphate binding)
Up	Aradu.GKD3R	aspartate aminotransferase 5%3B IPR000796 (Aspartate/other aminotransferase)%2C IPR015424 (Pyridoxal phosphate-dependent transferase)%3B GO:0003824 (catalytic activity)%2C GO:0006520 (cellular amino acid metabolic process)%2C GO:0008483 (transaminase activity)%2C GO:0009058 (biosynthetic process)%2C GO:0030170 (pyridoxal phosphate binding)
Down	Aradu.L4KP0	AT hook motif DNA-binding family protein%3B IPR005175 (Domain of unknown function DUF296)
Down	Aradu.YC9R6	AT hook motif DNA-binding family protein%3B IPR005175 (Domain of unknown function DUF296)
Down	Aradu.51ELU	AT hook motif DNA-binding family protein%3B IPR005175 (Domain of unknown function DUF296)%2C IPR017956 (AT hook%2C DNA-binding motif)%3B GO:0003677 (DNA binding)
Down	Aradu.14X1M	ATP binding microtubule motor family protein isoform 1 n%3D1 Tax%3DTheobroma cacao RepID%3DUPI00042B51DE%3B IPR001752 (Kinesin%2C motor domain)%2C IPR021881 (Protein of unknown function DUF3490)%2C IPR027417 (P-loop containing nucleoside triphosphate hydrolase)%2C IPR027640 (Kinesin-like protein)%3B GO:0003777 (microtubule motor activity)%2C GO:0005524 (ATP binding)%2C GO:0005871 (kinesin complex…
Down	Aradu.S46KB	ATP binding microtubule motor family protein isoform 1 n%3D2 Tax%3DTheobroma cacao RepID%3DUPI00042B0803%3B IPR001752 (Kinesin%2C motor domain)%2C IPR027417 (P-loop containing nucleoside triphosphate hydrolase)%2C IPR027640 (Kinesin-like protein)%3B GO:0003777 (microtubule motor activity)%2C GO:0005524 (ATP binding)%2C GO:0005871 (kinesin complex)%2C GO:0007018 (microtubule-based movement)%2C GO:…
Down	Araip.P7KNR	ATP binding microtubule motor family protein isoform 1 n%3D2 Tax%3DTheobroma cacao RepID%3DUPI00042B34D8%3B IPR001752 (Kinesin%2C motor domain)%2C IPR027417 (P-loop containing nucleoside triphosphate hydrolase)%2C IPR027640 (Kinesin-like protein)%3B GO:0003777 (microtubule motor activity)%2C GO:0005524 (ATP binding)%2C GO:0005871 (kinesin complex)%2C GO:0007018 (microtubule-based movement)%2C GO:…
Down	Aradu.S5UQ2	ATP binding microtubule motor family protein%2C putative isoform 1 n%3D1 Tax%3DTheobroma cacao RepID%3DUPI00042B81BB%3B IPR001752 (Kinesin%2C motor domain)%2C IPR010994 (RuvA domain 2-like)%2C IPR027417 (P-loop containing nucleoside triphosphate hydrolase)%2C IPR027640 (Kinesin-like protein)%3B GO:0003777 (microtubule motor activity)%2C GO:0005524 (ATP binding)%2C GO:0005871 (kinesin complex)%2C …
Down	Aradu.MM8M8	ATP binding microtubule motor family protein%3B IPR001715 (Calponin homology domain)%2C IPR001752 (Kinesin%2C motor domain)%2C IPR027417 (P-loop containing nucleoside triphosphate hydrolase)%2C IPR027640 (Kinesin-like protein)%3B GO:0003777 (microtubule motor activity)%2C GO:0005515 (protein binding)%2C GO:0005524 (ATP binding)%2C GO:0005871 (kinesin complex)%2C GO:0007018 (microtubule-based move…
Down	Aradu.5XW8A	ATP binding microtubule motor family protein%3B IPR001715 (Calponin homology domain)%2C IPR001752 (Kinesin%2C motor domain)%2C IPR027417 (P-loop containing nucleoside triphosphate hydrolase)%2C IPR027640 (Kinesin-like protein)%3B GO:0003777 (microtubule motor activity)%2C GO:0005515 (protein binding)%2C GO:0005524 (ATP binding)%2C GO:0005871 (kinesin complex)%2C GO:0007018 (microtubule-based move…
Down	Aradu.T2VBJ	ATP binding microtubule motor family protein%3B IPR001752 (Kinesin%2C motor domain)%2C IPR010544 (Kinesin-related conserved domain)%2C IPR027417 (P-loop containing nucleoside triphosphate hydrolase)%2C IPR027640 (Kinesin-like protein)%3B GO:0003777 (microtubule motor activity)%2C GO:0005524 (ATP binding)%2C GO:0005871 (kinesin complex)%2C GO:0007018 (microtubule-based movement)%2C GO:0008017 (mic…
Down	Aradu.82TY3	ATP binding microtubule motor family protein%3B IPR001752 (Kinesin%2C motor domain)%2C IPR010544 (Kinesin-related conserved domain)%2C IPR027417 (P-loop containing nucleoside triphosphate hydrolase)%2C IPR027640 (Kinesin-like protein)%3B GO:0003777 (microtubule motor activity)%2C GO:0005524 (ATP binding)%2C GO:0005871 (kinesin complex)%2C GO:0007018 (microtubule-based movement)%2C GO:0008017 (mic…
Down	Aradu.ZE2SQ	ATP binding microtubule motor family protein%3B IPR001752 (Kinesin%2C motor domain)%2C IPR016024 (Armadillo-type fold)%2C IPR027417 (P-loop containing nucleoside triphosphate hydrolase)%2C IPR027640 (Kinesin-like protein)%3B GO:0003777 (microtubule motor activity)%2C GO:0005488 (binding)%2C GO:0005515 (protein binding)%2C GO:0005524 (ATP binding)%2C GO:0005871 (kinesin complex)%2C GO:0007018 (mic…
Down	Aradu.VX1FR	ATP binding microtubule motor family protein%3B IPR001752 (Kinesin%2C motor domain)%2C IPR024658 (Kinesin-like%2C KLP2)%2C IPR027417 (P-loop containing nucleoside triphosphate hydrolase)%2C IPR027640 (Kinesin-like protein)%3B GO:0003777 (microtubule motor activity)%2C GO:0005524 (ATP binding)%2C GO:0005871 (kinesin complex)%2C GO:0007018 (microtubule-based movement)%2C GO:0008017 (microtubule bin…
Down	Aradu.N0P3W	ATP binding microtubule motor family protein%3B IPR001752 (Kinesin%2C motor domain)%2C IPR027417 (P-loop containing nucleoside triphosphate hydrolase)%2C IPR027640 (Kinesin-like protein)%3B GO:0003777 (microtubule motor activity)%2C GO:0005524 (ATP binding)%2C GO:0005871 (kinesin complex)%2C GO:0007018 (microtubule-based movement)%2C GO:0008017 (microtubule binding)
Down	Aradu.KB518	ATP binding microtubule motor family protein%3B IPR001752 (Kinesin%2C motor domain)%2C IPR027417 (P-loop containing nucleoside triphosphate hydrolase)%2C IPR027640 (Kinesin-like protein)%3B GO:0003777 (microtubule motor activity)%2C GO:0005524 (ATP binding)%2C GO:0005871 (kinesin complex)%2C GO:0007018 (microtubule-based movement)%2C GO:0008017 (microtubule binding)
Down	Aradu.8J5I0	ATP binding microtubule motor family protein%3B IPR001752 (Kinesin%2C motor domain)%2C IPR027417 (P-loop containing nucleoside triphosphate hydrolase)%2C IPR027640 (Kinesin-like protein)%3B GO:0003777 (microtubule motor activity)%2C GO:0005524 (ATP binding)%2C GO:0005871 (kinesin complex)%2C GO:0007018 (microtubule-based movement)%2C GO:0008017 (microtubule binding)
Down	Aradu.23UDC	ATP binding microtubule motor family protein%3B IPR001752 (Kinesin%2C motor domain)%2C IPR027417 (P-loop containing nucleoside triphosphate hydrolase)%2C IPR027640 (Kinesin-like protein)%3B GO:0003777 (microtubule motor activity)%2C GO:0005524 (ATP binding)%2C GO:0005871 (kinesin complex)%2C GO:0007018 (microtubule-based movement)%2C GO:0008017 (microtubule binding)
Down	Aradu.T9CQ4	ATP binding protein n%3D3 Tax%3DZea mays RepID%3DB6SKI4_MAIZE%3B IPR001611 (Leucine-rich repeat)%2C IPR011009 (Protein kinase-like domain)%2C IPR013320 (Concanavalin A-like lectin/glucanase%2C subgroup)%3B GO:0004672 (protein kinase activity)%2C GO:0005515 (protein binding)%2C GO:0005524 (ATP binding)%2C GO:0006468 (protein phosphorylation)
Down	Aradu.ASG4G	ATP binding protein%2C putative isoform 4 n%3D3 Tax%3DTheobroma cacao RepID%3DUPI00042B7B6A%3B IPR001752 (Kinesin%2C motor domain)%2C IPR010544 (Kinesin-related conserved domain)%2C IPR027417 (P-loop containing nucleoside triphosphate hydrolase)%2C IPR027640 (Kinesin-like protein)%3B GO:0003777 (microtubule motor activity)%2C GO:0005524 (ATP binding)%2C GO:0005871 (kinesin complex)%2C GO:0007018 …
Down	Araip.WA9TW	ATP binding protein%2C putative n%3D1 Tax%3DRicinus communis RepID%3DB9S2R0_RICCO%3B IPR000742 (Epidermal growth factor-like domain)%2C IPR011009 (Protein kinase-like domain)%2C IPR013320 (Concanavalin A-like lectin/glucanase%2C subgroup)%2C IPR025287 (Wall-associated receptor kinase galacturonan-binding domain)%3B GO:0004672 (protein kinase activity)%2C GO:0005509 (calcium ion binding)%2C GO:000…
Down	Araip.EDF0T	ATP binding protein%2C putative n%3D1 Tax%3DRicinus communis RepID%3DB9S2R0_RICCO%3B IPR001881 (EGF-like calcium-binding domain)%2C IPR011009 (Protein kinase-like domain)%2C IPR013320 (Concanavalin A-like lectin/glucanase%2C subgroup)%2C IPR025287 (Wall-associated receptor kinase galacturonan-binding domain)%3B GO:0004672 (protein kinase activity)%2C GO:0005509 (calcium ion binding)%2C GO:0005524…
Down	Aradu.8A6LI	ATP binding protein%2C putative n%3D1 Tax%3DRicinus communis RepID%3DB9S2R0_RICCO%3B IPR001881 (EGF-like calcium-binding domain)%2C IPR011009 (Protein kinase-like domain)%2C IPR013320 (Concanavalin A-like lectin/glucanase%2C subgroup)%2C IPR025287 (Wall-associated receptor kinase galacturonan-binding domain)%3B GO:0004672 (protein kinase activity)%2C GO:0005509 (calcium ion binding)%2C GO:0005524…
Down	Aradu.86EN3	ATP binding%3B GTP binding%3B nucleotide binding%3B nucleoside-triphosphatases%3B IPR000767 (Disease resistance protein)%2C IPR027417 (P-loop containing nucleoside triphosphate hydrolase)%3B GO:0000166 (nucleotide binding)%2C GO:0006952 (defense response)%2C GO:0017111 (nucleoside-triphosphatase activity)%2C GO:0043531 (ADP binding)
Down	Aradu.NI98G	ATP binding%3B GTP binding%3B nucleotide binding%3B nucleoside-triphosphatases%3B IPR000767 (Disease resistance protein)%2C IPR027417 (P-loop containing nucleoside triphosphate hydrolase)%3B GO:0000166 (nucleotide binding)%2C GO:0006952 (defense response)%2C GO:0017111 (nucleoside-triphosphatase activity)%2C GO:0043531 (ADP binding)
Down	Aradu.GW9V5	ATP binding%3B GTP binding%3B nucleotide binding%3B nucleoside-triphosphatases%3B IPR000767 (Disease resistance protein)%2C IPR027417 (P-loop containing nucleoside triphosphate hydrolase)%3B GO:0000166 (nucleotide binding)%2C GO:0006952 (defense response)%2C GO:0017111 (nucleoside-triphosphatase activity)%2C GO:0043531 (ADP binding)
Up	Aradu.PQ2ZZ	ATP binding%3B valine-tRNA ligases%3B aminoacyl-tRNA ligases%3B nucleotide binding%3B ATP binding%3B aminoacyl-tRNA ligases%3B IPR002302 (Leucine-tRNA ligase)%2C IPR009080 (Aminoacyl-tRNA synthetase%2C class 1a%2C anticodon-binding)%3B GO:0000166 (nucleotide binding)%2C GO:0002161 (aminoacyl-tRNA editing activity)%2C GO:0004812 (aminoacyl-tRNA ligase activity)%2C GO:0004823 (leucine-tRNA ligase a…
Up	Aradu.RYE34	ATP binding/protein serine/threonine kinase [Glycine max]%3B IPR001611 (Leucine-rich repeat)%2C IPR003591 (Leucine-rich repeat%2C typical subtype)%2C IPR011009 (Protein kinase-like domain)%2C IPR013210 (Leucine-rich repeat-containing N-terminal%2C type 2)%2C IPR025875 (Leucine rich repeat 4)%3B GO:0004672 (protein kinase activity)%2C GO:0005515 (protein binding)%2C GO:0005524 (ATP binding)%2C GO:…
Up	Araip.E4WF7	ATP binding/protein serine/threonine kinase [Glycine max]%3B IPR001611 (Leucine-rich repeat)%2C IPR003591 (Leucine-rich repeat%2C typical subtype)%2C IPR011009 (Protein kinase-like domain)%2C IPR013210 (Leucine-rich repeat-containing N-terminal%2C type 2)%2C IPR025875 (Leucine rich repeat 4)%3B GO:0004672 (protein kinase activity)%2C GO:0005515 (protein binding)%2C GO:0005524 (ATP binding)%2C GO:…
Down	Aradu.14MBC	ATP binding/protein serine/threonine kinase [Glycine max]%3B IPR011009 (Protein kinase-like domain)%2C IPR013083 (Zinc finger%2C RING/FYVE/PHD-type)%3B GO:0004672 (protein kinase activity)%2C GO:0005515 (protein binding)%2C GO:0005524 (ATP binding)%2C GO:0006468 (protein phosphorylation)%2C GO:0008270 (zinc ion binding)
Up	Aradu.QR3I5	ATP synthase F0 subunit 4 n%3D15 Tax%3DLiliopsida RepID%3DG9HNT5_PHODC%3B IPR008688 (ATPase%2C F0 complex%2C B chain/subunit B/MI25)%3B GO:0015078 (hydrogen ion transmembrane transporter activity)%2C GO:0015986 (ATP synthesis coupled proton transport)
Up	Aradu.03X4Q	ATP synthase gamma chain 1 family protein n%3D3 Tax%3DPopulus RepID%3DB9H1A7_POPTR%3B IPR000131 (ATPase%2C F1 complex%2C gamma subunit)%2C IPR023633 (ATPase%2C F1 complex%2C gamma subunit domain)%3B GO:0015986 (ATP synthesis coupled proton transport)
Down	Aradu.BY3LD	ATPase family AAA domain-containing protein 1-like [Glycine max]%3B IPR027417 (P-loop containing nucleoside triphosphate hydrolase)%3B GO:0000166 (nucleotide binding)%2C GO:0005524 (ATP binding)%2C GO:0017111 (nucleoside-triphosphatase activity)
Down	Aradu.E3GM7	ATPase family AAA domain-containing protein 3-B-like [Glycine max]%3B IPR021911 (ATPase family AAA domain-containing protein 3%2C domain of unknown function DUF3523)%2C IPR027417 (P-loop containing nucleoside triphosphate hydrolase)%3B GO:0000166 (nucleotide binding)%2C GO:0005524 (ATP binding)%2C GO:0017111 (nucleoside-triphosphatase activity)
Down	Aradu.47R5R	ATPase family AAA domain-containing protein 3-like [Glycine max]%3B IPR021911 (ATPase family AAA domain-containing protein 3%2C domain of unknown function DUF3523)%2C IPR027417 (P-loop containing nucleoside triphosphate hydrolase)%3B GO:0000166 (nucleotide binding)%2C GO:0005524 (ATP binding)%2C GO:0017111 (nucleoside-triphosphatase activity)
Up	Aradu.325NR	ATP-binding ABC transporter%3B IPR011527 (ABC transporter type 1%2C transmembrane domain)%2C IPR027417 (P-loop containing nucleoside triphosphate hydrolase)%3B GO:0000166 (nucleotide binding)%2C GO:0005524 (ATP binding)%2C GO:0006810 (transport)%2C GO:0016021 (integral component of membrane)%2C GO:0016887 (ATPase activity)%2C GO:0017111 (nucleoside-triphosphatase activity)%2C GO:0055085 (transmem…
Down	Aradu.EU9MI	ATP-binding ABC transporter%3B IPR013525 (ABC-2 type transporter)%2C IPR027417 (P-loop containing nucleoside triphosphate hydrolase)%3B GO:0000166 (nucleotide binding)%2C GO:0005524 (ATP binding)%2C GO:0016020 (membrane)%2C GO:0016887 (ATPase activity)%2C GO:0017111 (nucleoside-triphosphatase activity)
Up	Aradu.V1XA0	ATP-binding ABC transporter%3B IPR013525 (ABC-2 type transporter)%2C IPR027417 (P-loop containing nucleoside triphosphate hydrolase)%3B GO:0000166 (nucleotide binding)%2C GO:0005524 (ATP binding)%2C GO:0016020 (membrane)%2C GO:0016887 (ATPase activity)%2C GO:0017111 (nucleoside-triphosphatase activity)
Up	Aradu.82IUF	ATP-binding ABC transporter%3B IPR013525 (ABC-2 type transporter)%2C IPR027417 (P-loop containing nucleoside triphosphate hydrolase)%3B GO:0000166 (nucleotide binding)%2C GO:0005524 (ATP binding)%2C GO:0016020 (membrane)%2C GO:0016887 (ATPase activity)%2C GO:0017111 (nucleoside-triphosphatase activity)
Down	Aradu.08GEE	ATP-binding ABC transporter%3B IPR026082 (ABC transporter A%2C ABCA)%2C IPR027417 (P-loop containing nucleoside triphosphate hydrolase)%3B GO:0000166 (nucleotide binding)%2C GO:0005524 (ATP binding)%2C GO:0016887 (ATPase activity)%2C GO:0017111 (nucleoside-triphosphatase activity)
Up	Aradu.E9NV7	ATP-binding ABC transporter%3B IPR027417 (P-loop containing nucleoside triphosphate hydrolase)%3B GO:0000166 (nucleotide binding)%2C GO:0005524 (ATP binding)%2C GO:0016887 (ATPase activity)%2C GO:0017111 (nucleoside-triphosphatase activity)
Up	Aradu.694KT	ATP-binding ABC transporter%3B IPR027417 (P-loop containing nucleoside triphosphate hydrolase)%3B GO:0000166 (nucleotide binding)%2C GO:0005524 (ATP binding)%2C GO:0016887 (ATPase activity)%2C GO:0017111 (nucleoside-triphosphatase activity)
Down	Aradu.AI6BS	ATP-binding microtubule motor family protein%3B IPR001752 (Kinesin%2C motor domain)%2C IPR021881 (Protein of unknown function DUF3490)%2C IPR027417 (P-loop containing nucleoside triphosphate hydrolase)%2C IPR027640 (Kinesin-like protein)%3B GO:0003777 (microtubule motor activity)%2C GO:0005524 (ATP binding)%2C GO:0005871 (kinesin complex)%2C GO:0007018 (microtubule-based movement)%2C GO:0008017 (…
Down	Aradu.DQQ9H	ATP-binding microtubule motor family protein%3B IPR001752 (Kinesin%2C motor domain)%2C IPR021881 (Protein of unknown function DUF3490)%2C IPR027417 (P-loop containing nucleoside triphosphate hydrolase)%2C IPR027640 (Kinesin-like protein)%3B GO:0003777 (microtubule motor activity)%2C GO:0005524 (ATP binding)%2C GO:0005871 (kinesin complex)%2C GO:0007018 (microtubule-based movement)%2C GO:0008017 (…
Up	Aradu.CKU4P	ATP-citrate lyase A-1%3B IPR013650 (ATP-grasp fold%2C succinyl-CoA synthetase-type)%2C IPR016102 (Succinyl-CoA synthetase-like)%3B GO:0005524 (ATP binding)
Up	Aradu.22FIV	ATP-citrate synthase alpha chain protein
Down	Aradu.DL5VG	ATP-dependent DNA helicase 2 subunit Ku70%3B IPR006165 (Ku70)%3B GO:0000723 (telomere maintenance)%2C GO:0003676 (nucleic acid binding)%2C GO:0003677 (DNA binding)%2C GO:0003684 (damaged DNA binding)%2C GO:0004003 (ATP-dependent DNA helicase activity)%2C GO:0005634 (nucleus)%2C GO:0006303 (double-strand break repair via nonhomologous end joining)%2C GO:0042162 (telomeric DNA binding)%2C GO:004356…
Down	Araip.5L7YD	ATP-dependent RNA helicase%2C mitochondrial%2C putative%3B IPR001650 (Helicase%2C C-terminal)%2C IPR027417 (P-loop containing nucleoside triphosphate hydrolase)%3B GO:0003676 (nucleic acid binding)%2C GO:0004386 (helicase activity)%2C GO:0005524 (ATP binding)
Up	Aradu.WHI5H	ATP-dependent zinc metalloprotease FTSH protein%3B IPR005936 (Peptidase%2C FtsH)%2C IPR011546 (Peptidase M41%2C FtsH extracellular)%2C IPR027417 (P-loop containing nucleoside triphosphate hydrolase)%3B GO:0000166 (nucleotide binding)%2C GO:0004222 (metalloendopeptidase activity)%2C GO:0005524 (ATP binding)%2C GO:0006508 (proteolysis)%2C GO:0008270 (zinc ion binding)%2C GO:0016020 (membrane)%2C GO…
Up	Aradu.5M89W	ATP-dependent zinc metalloprotease FTSH protein%3B IPR005936 (Peptidase%2C FtsH)%2C IPR027417 (P-loop containing nucleoside triphosphate hydrolase)%3B GO:0000166 (nucleotide binding)%2C GO:0004222 (metalloendopeptidase activity)%2C GO:0005524 (ATP binding)%2C GO:0006508 (proteolysis)%2C GO:0016020 (membrane)%2C GO:0017111 (nucleoside-triphosphatase activity)
Up	Araip.HWL5M	autophagy protein beclin 1%3B IPR007243 (Atg6/Beclin)%3B GO:0006914 (autophagy)
Up	Aradu.UA4SA	auxilin-like protein 1-like isoform X1 [Glycine max]%3B IPR001623 (DnaJ domain)
Up	Araip.2Z1C1	Auxin efflux carrier family protein%3B IPR004776 (Auxin efflux carrier)%3B GO:0016021 (integral component of membrane)%2C GO:0055085 (transmembrane transport)
Up	Aradu.MHM9J	Auxin efflux carrier family protein%3B IPR004776 (Auxin efflux carrier)%3B GO:0016021 (integral component of membrane)%2C GO:0055085 (transmembrane transport)
Up	Aradu.U20ZR	Auxin efflux carrier family protein%3B IPR004776 (Auxin efflux carrier)%3B GO:0016021 (integral component of membrane)%2C GO:0055085 (transmembrane transport)
Up	Aradu.PZ2UH	auxin response factor 4%3B IPR010525 (Auxin response factor)%2C IPR015300 (DNA-binding pseudobarrel domain)%3B GO:0003677 (DNA binding)%2C GO:0005634 (nucleus)%2C GO:0009725 (response to hormone)
Up	Aradu.YC3RY	auxin response factor 4%3B IPR010525 (Auxin response factor)%2C IPR015300 (DNA-binding pseudobarrel domain)%3B GO:0003677 (DNA binding)%2C GO:0005634 (nucleus)%2C GO:0009725 (response to hormone)
Up	Aradu.XU9GE	auxin transporter-like protein 5-like isoform X1 [Glycine max]%3B IPR013057 (Amino acid transporter%2C transmembrane)
Down	Aradu.T52CY	Auxin-responsive family protein%3B IPR004877 (Cytochrome b561%2C eukaryote)%2C IPR005018 (DOMON domain)%2C IPR017214 (Uncharacterised conserved protein UCP037471)%3B GO:0016021 (integral component of membrane)
Down	Aradu.A19KY	Auxin-responsive family protein%3B IPR004877 (Cytochrome b561%2C eukaryote)%2C IPR017214 (Uncharacterised conserved protein UCP037471)%3B GO:0016021 (integral component of membrane)
Down	Aradu.9S6MI	basic 7S globulin [Glycine max]%3B IPR001461 (Aspartic peptidase)%2C IPR021109 (Aspartic peptidase domain)%3B GO:0004190 (aspartic-type endopeptidase activity)%2C GO:0006508 (proteolysis)
Down	Aradu.UV8L7	Basic helix-loop-helix (bHLH) DNA-binding family protein%3B IPR011598 (Myc-type%2C basic helix-loop-helix (bHLH) domain)%2C IPR025610 (Transcription factor MYC/MYB N-terminal)%3B GO:0046983 (protein dimerization activity)
Down	Aradu.Q74TI	basic helix-loop-helix (bHLH) DNA-binding superfamily protein%3B IPR011598 (Myc-type%2C basic helix-loop-helix (bHLH) domain)%2C IPR025610 (Transcription factor MYC/MYB N-terminal)%3B GO:0046983 (protein dimerization activity)
Up	Aradu.5Q1VY	basic helix-loop-helix (bHLH) DNA-binding superfamily protein%3B IPR011598 (Myc-type%2C basic helix-loop-helix (bHLH) domain)%3B GO:0046983 (protein dimerization activity)
Down	Aradu.S0KU9	basic helix-loop-helix (bHLH) DNA-binding superfamily protein%3B IPR011598 (Myc-type%2C basic helix-loop-helix (bHLH) domain)%3B GO:0046983 (protein dimerization activity)
Up	Aradu.LYC6U	basic helix-loop-helix (bHLH) DNA-binding superfamily protein%3B IPR011598 (Myc-type%2C basic helix-loop-helix (bHLH) domain)%3B GO:0046983 (protein dimerization activity)
Down	Aradu.X6KLL	basic helix-loop-helix (bHLH) DNA-binding superfamily protein%3B IPR011598 (Myc-type%2C basic helix-loop-helix (bHLH) domain)%3B GO:0046983 (protein dimerization activity)
Up	Aradu.VS58Y	basic helix-loop-helix (bHLH) DNA-binding superfamily protein%3B IPR015660 (Achaete-scute transcription factor-related)%3B GO:0003677 (DNA binding)%2C GO:0046983 (protein dimerization activity)
Up	Aradu.XPB0N	B-box type zinc finger family protein
Up	Araip.3P203	B-box type zinc finger family protein
Down	Aradu.CA0F7	BEL1-like homeodomain protein 1-like isoform X4 [Glycine max]%3B IPR006563 (POX domain)%2C IPR009057 (Homeodomain-like)%3B GO:0003677 (DNA binding)%2C GO:0003700 (sequence-specific DNA binding transcription factor activity)%2C GO:0043565 (sequence-specific DNA binding)
Up	Aradu.KPJ13	benzyl alcohol O-benzoyltransferase-like [Glycine max]%3B IPR003480 (Transferase)%2C IPR023213 (Chloramphenicol acetyltransferase-like domain)
Up	Aradu.DQ0Q1	benzyl alcohol O-benzoyltransferase-like [Glycine max]%3B IPR003480 (Transferase)%2C IPR023213 (Chloramphenicol acetyltransferase-like domain)
Up	Aradu.CMR3G	beta glucosidase 11%3B IPR001360 (Glycoside hydrolase%2C family 1)%2C IPR017853 (Glycoside hydrolase%2C superfamily)%3B GO:0005975 (carbohydrate metabolic process)
Up	Araip.9HK1M	beta glucosidase 11%3B IPR001360 (Glycoside hydrolase%2C family 1)%2C IPR017853 (Glycoside hydrolase%2C superfamily)%3B GO:0005975 (carbohydrate metabolic process)
Up	Araip.RXZ9L	beta glucosidase 11%3B IPR001360 (Glycoside hydrolase%2C family 1)%2C IPR017853 (Glycoside hydrolase%2C superfamily)%3B GO:0005975 (carbohydrate metabolic process)
Down	Aradu.UT05R	beta glucosidase 12%3B IPR001360 (Glycoside hydrolase%2C family 1)%2C IPR017853 (Glycoside hydrolase%2C superfamily)%3B GO:0005975 (carbohydrate metabolic process)
Up	Aradu.XVT29	beta glucosidase 12%3B IPR001360 (Glycoside hydrolase%2C family 1)%2C IPR017853 (Glycoside hydrolase%2C superfamily)%3B GO:0005975 (carbohydrate metabolic process)
Up	Aradu.H5ZPW	beta glucosidase 14%3B IPR001360 (Glycoside hydrolase%2C family 1)%2C IPR017853 (Glycoside hydrolase%2C superfamily)%3B GO:0005975 (carbohydrate metabolic process)
Up	Aradu.L8BYH	beta glucosidase 17%3B IPR001360 (Glycoside hydrolase%2C family 1)%2C IPR017853 (Glycoside hydrolase%2C superfamily)%3B GO:0005975 (carbohydrate metabolic process)
Up	Aradu.KH972	beta glucosidase 17%3B IPR001360 (Glycoside hydrolase%2C family 1)%2C IPR017853 (Glycoside hydrolase%2C superfamily)%3B GO:0005975 (carbohydrate metabolic process)
Up	Araip.C5BJ8	beta glucosidase 25%3B IPR001360 (Glycoside hydrolase%2C family 1)%2C IPR017853 (Glycoside hydrolase%2C superfamily)%3B GO:0005975 (carbohydrate metabolic process)
Down	Aradu.S7CZ4	beta-D-xylosidase 4%3B IPR002772 (Glycoside hydrolase family 3 C-terminal domain)%2C IPR017853 (Glycoside hydrolase%2C superfamily)%2C IPR026891 (Fibronectin type III-like domain)%2C IPR026892 (Glycoside hydrolase family 3)%3B GO:0005975 (carbohydrate metabolic process)
Up	Aradu.8AZ50	beta-D-xylosidase 4%3B IPR002772 (Glycoside hydrolase family 3 C-terminal domain)%2C IPR017853 (Glycoside hydrolase%2C superfamily)%2C IPR026891 (Fibronectin type III-like domain)%2C IPR026892 (Glycoside hydrolase family 3)%3B GO:0005975 (carbohydrate metabolic process)
Up	Aradu.7N2H0	beta-fructofuranosidase 5%3B IPR001362 (Glycoside hydrolase%2C family 32)%2C IPR008985 (Concanavalin A-like lectin/glucanases superfamily)%2C IPR021792 (Beta-fructofuranosidase)%2C IPR023296 (Glycosyl hydrolase%2C five-bladed beta-propellor domain)%3B GO:0004564 (beta-fructofuranosidase activity)%2C GO:0004575 (sucrose alpha-glucosidase activity)%2C GO:0005975 (carbohydrate metabolic process)
Down	Araip.37CJP	beta-galactosidase 3
Down	Aradu.K17EL	beta-hexosaminidase 1%3B IPR017853 (Glycoside hydrolase%2C superfamily)%2C IPR025705 (Beta-hexosaminidase)%3B GO:0004563 (beta-N-acetylhexosaminidase activity)%2C GO:0005975 (carbohydrate metabolic process)
Down	Araip.9T02K	beta-hexosaminidase 1%3B IPR017853 (Glycoside hydrolase%2C superfamily)%2C IPR025705 (Beta-hexosaminidase)%3B GO:0004563 (beta-N-acetylhexosaminidase activity)%2C GO:0005975 (carbohydrate metabolic process)
Up	Aradu.S4LWP	Beta-propeller domain-containing protein%2C methanol dehydrogenase n%3D1 Tax%3DSynechococcus sp. PCC 7502 RepID%3DK9SRG8_9SYNE%3B IPR007621 (TPM domain)
Down	Aradu.H3F0Z	Bifunctional arginine demethylase and lysyl-hydroxylase JMJD6 n%3D13 Tax%3DEutheria RepID%3DB2WTI4_HUMAN%3B IPR001810 (F-box domain)%2C IPR003347 (JmjC domain)%2C IPR011009 (Protein kinase-like domain)%3B GO:0005515 (protein binding)
Up	Aradu.25DKA	Bifunctional inhibitor/lipid-transfer protein/seed storage 2S albumin superfamily protein%3B IPR016140 (Bifunctional inhibitor/plant lipid transfer protein/seed storage helical domain)
Up	Aradu.IJ8T5	Bifunctional inhibitor/lipid-transfer protein/seed storage 2S albumin superfamily protein%3B IPR016140 (Bifunctional inhibitor/plant lipid transfer protein/seed storage helical domain)
Down	Aradu.ZC7R3	Bifunctional inhibitor/lipid-transfer protein/seed storage 2S albumin superfamily protein%3B IPR016140 (Bifunctional inhibitor/plant lipid transfer protein/seed storage helical domain)
Down	Aradu.U6RXK	Bifunctional inhibitor/lipid-transfer protein/seed storage 2S albumin superfamily protein%3B IPR016140 (Bifunctional inhibitor/plant lipid transfer protein/seed storage helical domain)
Down	Aradu.V7YK4	bilirubin oxidase-like isoform X1 [Glycine max]%3B IPR008972 (Cupredoxin)%3B GO:0005507 (copper ion binding)%2C GO:0016491 (oxidoreductase activity)%2C GO:0055114 (oxidation-reduction process)
Down	Araip.0HI3Y	binding to TOMV RNA 1L (long form) protein%3B IPR004088 (K Homology domain%2C type 1)%3B GO:0003723 (RNA binding)
Down	Aradu.0JT6M	biotin carboxyl carrier acetyl-CoA carboxylase%3B IPR000089 (Biotin/lipoyl attachment)%2C IPR001249 (Acetyl-CoA biotin carboxyl carrier)%3B GO:0003989 (acetyl-CoA carboxylase activity)%2C GO:0006633 (fatty acid biosynthetic process)%2C GO:0009317 (acetyl-CoA carboxylase complex)
Down	Aradu.CG4KR	biotin carboxyl carrier acetyl-CoA carboxylase%3B IPR000089 (Biotin/lipoyl attachment)%2C IPR001249 (Acetyl-CoA biotin carboxyl carrier)%3B GO:0003989 (acetyl-CoA carboxylase activity)%2C GO:0006633 (fatty acid biosynthetic process)%2C GO:0009317 (acetyl-CoA carboxylase complex)
Down	Aradu.9V11P	blue copper protein-like [Glycine max]%3B IPR008972 (Cupredoxin)%3B GO:0005507 (copper ion binding)%2C GO:0009055 (electron carrier activity)
Down	Aradu.57AI4	blue copper protein-like [Glycine max]%3B IPR008972 (Cupredoxin)%3B GO:0005507 (copper ion binding)%2C GO:0009055 (electron carrier activity)
Down	Aradu.D0SQ3	blue copper protein-like [Glycine max]%3B IPR008972 (Cupredoxin)%3B GO:0005507 (copper ion binding)%2C GO:0009055 (electron carrier activity)
Down	Aradu.C3FIF	BON1-associated-like protein%3B IPR000008 (C2 domain)%3B GO:0005515 (protein binding)
Up	Aradu.LA8W4	Bowman birk trypsin inhibitor%3B IPR000877 (Proteinase inhibitor I12%2C Bowman-Birk)%3B GO:0004867 (serine-type endopeptidase inhibitor activity)%2C GO:0005576 (extracellular region)
Up	Araip.8H742	Bowman birk trypsin inhibitor%3B IPR000877 (Proteinase inhibitor I12%2C Bowman-Birk)%3B GO:0004867 (serine-type endopeptidase inhibitor activity)%2C GO:0005576 (extracellular region)
Up	Araip.7C7U5	Bowman birk trypsin inhibitor%3B IPR000877 (Proteinase inhibitor I12%2C Bowman-Birk)%3B GO:0004867 (serine-type endopeptidase inhibitor activity)%2C GO:0005576 (extracellular region)
Up	Aradu.BMJ7K	Bowman birk trypsin inhibitor%3B IPR000877 (Proteinase inhibitor I12%2C Bowman-Birk)%3B GO:0004867 (serine-type endopeptidase inhibitor activity)%2C GO:0005576 (extracellular region)
Down	Aradu.E3D7M	branched-chain-amino-acid aminotransferase-like protein%3B IPR001544 (Aminotransferase%2C class IV)%2C IPR027417 (P-loop containing nucleoside triphosphate hydrolase)%3B GO:0003824 (catalytic activity)%2C GO:0008152 (metabolic process)
Up	Araip.3H9YN	Brassinosteroid signalling positive regulator (BZR1) family protein
Down	Aradu.Z1AGZ	brefeldin A-inhibited guanine nucleotide-exchange protein%3B IPR000904 (Sec7 domain)%2C IPR016024 (Armadillo-type fold)%2C IPR023394 (Sec7 domain%2C alpha orthogonal bundle)%3B GO:0005086 (ARF guanyl-nucleotide exchange factor activity)%2C GO:0005488 (binding)%2C GO:0032012 (regulation of ARF protein signal transduction)
Up	Aradu.N93N0	BSD domain-containing protein%3B IPR005607 (BSD)
Down	Aradu.UQ2CM	BTB/POZ domain-containing protein [Glycine max]%3B IPR011333 (BTB/POZ fold)%2C IPR027356 (NPH3 domain)
Up	Aradu.NAE9S	BTB/POZ domain-containing protein [Glycine max]%3B IPR011333 (BTB/POZ fold)%2C IPR027356 (NPH3 domain)%3B GO:0005515 (protein binding)
Up	Aradu.YLM4Q	BTB/POZ domain-containing protein [Glycine max]%3B IPR011333 (BTB/POZ fold)%2C IPR027356 (NPH3 domain)%3B GO:0005515 (protein binding)
Up	Aradu.U3UVH	BTB/POZ domain-containing protein [Glycine max]%3B IPR011333 (BTB/POZ fold)%2C IPR027356 (NPH3 domain)%3B GO:0005515 (protein binding)
Down	Aradu.J67TY	BTB/POZ domain-containing protein [Glycine max]%3B IPR027356 (NPH3 domain)
Up	Aradu.BYP3X	BURP domain-containing protein%3B IPR004873 (BURP domain)
Up	Araip.H879K	BURP domain-containing protein%3B IPR004873 (BURP domain)
Down	Aradu.VA5ME	bZIP family transcription factor%3B IPR004827 (Basic-leucine zipper domain)%3B GO:0003700 (sequence-specific DNA binding transcription factor activity)%2C GO:0043565 (sequence-specific DNA binding)
Down	Aradu.GYY4U	bZIP transcription factor bZIP56 isoform X1 [Glycine max]%3B IPR012458 (Protein of unknown function DUF1664)
Down	Aradu.SKU80	bZIP transcription factor bZIP9 isoform X1 [Glycine max]%3B IPR004827 (Basic-leucine zipper domain)%3B GO:0003700 (sequence-specific DNA binding transcription factor activity)%2C GO:0043565 (sequence-specific DNA binding)
Up	Aradu.54E1H	bZIP transcription factor family protein%3B IPR004827 (Basic-leucine zipper domain)%2C IPR020983 (Basic leucine-zipper%2C C-terminal)%3B GO:0003700 (sequence-specific DNA binding transcription factor activity)%2C GO:0043565 (sequence-specific DNA binding)
Down	Aradu.938CR	bZIP transcription factor family protein%3B IPR004827 (Basic-leucine zipper domain)%2C IPR020983 (Basic leucine-zipper%2C C-terminal)%3B GO:0003700 (sequence-specific DNA binding transcription factor activity)%2C GO:0043565 (sequence-specific DNA binding)
Down	Aradu.BUY04	C2 calcium/lipid-binding and GRAM domain containing protein%3B IPR000008 (C2 domain)%2C IPR013583 (Phosphoribosyltransferase C-terminal)%3B GO:0005515 (protein binding)
Down	Aradu.H34VM	C2 calcium/lipid-binding and GRAM domain containing protein%3B IPR000008 (C2 domain)%2C IPR013583 (Phosphoribosyltransferase C-terminal)%3B GO:0005515 (protein binding)
Up	Aradu.Q5AJH	CAAX amino terminal protease family protein%3B IPR003675 (CAAX amino terminal protease)%3B GO:0016020 (membrane)
Down	Aradu.36SI6	caffeoyl-CoA 3-O-methyltransferase%3B IPR002935 (O-methyltransferase%2C family 3)%3B GO:0008171 (O-methyltransferase activity)
Down	Araip.VAV3K	caffeoyl-CoA 3-O-methyltransferase%3B IPR002935 (O-methyltransferase%2C family 3)%3B GO:0008171 (O-methyltransferase activity)
Down	Araip.RK1ZX	caffeoyl-CoA 3-O-methyltransferase%3B IPR002935 (O-methyltransferase%2C family 3)%3B GO:0008171 (O-methyltransferase activity)
Down	Aradu.CLF8Y	caffeoyl-CoA 3-O-methyltransferase%3B IPR002935 (O-methyltransferase%2C family 3)%3B GO:0008171 (O-methyltransferase activity)
Down	Aradu.EK9XT	caffeoylshikimate esterase-like isoform X1 [Glycine max]
Down	Aradu.ZHY64	Calcium-binding EF-hand family protein%3B IPR004143 (Biotin/lipoate A/B protein ligase)%2C IPR011992 (EF-hand domain pair)%3B GO:0003824 (catalytic activity)%2C GO:0005509 (calcium ion binding)%2C GO:0006464 (cellular protein modification process)
Up	Aradu.28NB9	Calcium-binding EF-hand family protein%3B IPR004837 (Sodium/calcium exchanger membrane region)%2C IPR011992 (EF-hand domain pair)%3B GO:0005509 (calcium ion binding)%2C GO:0016021 (integral component of membrane)%2C GO:0055085 (transmembrane transport)
Down	Araip.1X27I	Calcium-binding EF-hand family protein%3B IPR011992 (EF-hand domain pair)%3B GO:0005509 (calcium ion binding)
Down	Aradu.F99CN	Calcium-binding EF-hand family protein%3B IPR011992 (EF-hand domain pair)%3B GO:0005509 (calcium ion binding)
Down	Aradu.T5EIW	Calcium-binding EF-hand family protein%3B IPR011992 (EF-hand domain pair)%3B GO:0005509 (calcium ion binding)
Up	Aradu.ZZ215	calcium-dependent protein kinase 2%3B IPR011009 (Protein kinase-like domain)%2C IPR011992 (EF-hand domain pair)%3B GO:0004672 (protein kinase activity)%2C GO:0005509 (calcium ion binding)%2C GO:0005524 (ATP binding)%2C GO:0006468 (protein phosphorylation)
Down	Aradu.T37GN	calcium-transporting ATPase 2%2C plasma membrane-type protein%3B IPR001757 (Cation-transporting P-type ATPase)%2C IPR023214 (HAD-like domain)%2C IPR023298 (P-type ATPase%2C transmembrane domain)%2C IPR024750 (Calcium-transporting P-type ATPase%2C N-terminal autoinhibitory domain)%3B GO:0000166 (nucleotide binding)%2C GO:0005388 (calcium-transporting ATPase activity)%2C GO:0005516 (calmodulin bind…
Down	Aradu.46IYL	calcium-transporting ATPase 2%2C plasma membrane-type protein%3B IPR001757 (Cation-transporting P-type ATPase)%2C IPR023214 (HAD-like domain)%2C IPR023298 (P-type ATPase%2C transmembrane domain)%2C IPR024750 (Calcium-transporting P-type ATPase%2C N-terminal autoinhibitory domain)%3B GO:0000166 (nucleotide binding)%2C GO:0005388 (calcium-transporting ATPase activity)%2C GO:0005516 (calmodulin bind…
Down	Araip.R96TM	calcium-transporting ATPase 8%2C plasma membrane-type protein%3B IPR001757 (Cation-transporting P-type ATPase)%2C IPR023214 (HAD-like domain)%2C IPR023298 (P-type ATPase%2C transmembrane domain)%3B GO:0000166 (nucleotide binding)%2C GO:0005388 (calcium-transporting ATPase activity)%2C GO:0005524 (ATP binding)%2C GO:0006812 (cation transport)%2C GO:0016020 (membrane)%2C GO:0016021 (integral compon…
Down	Aradu.P6CBV	calcium-transporting ATPase 9%2C plasma membrane-type-like [Glycine max]%3B IPR001757 (Cation-transporting P-type ATPase)%2C IPR002885 (Pentatricopeptide repeat)%2C IPR023214 (HAD-like domain)%2C IPR023298 (P-type ATPase%2C transmembrane domain)%2C IPR024750 (Calcium-transporting P-type ATPase%2C N-terminal autoinhibitory domain)%3B GO:0000166 (nucleotide binding)%2C GO:0005388 (calcium-transport…
Down	Aradu.GD6AN	Calmodulin binding protein-like%3B IPR012416 (Calmodulin binding protein-like)
Down	Aradu.0Q24I	Calmodulin binding protein-like%3B IPR012416 (Calmodulin binding protein-like)
Down	Aradu.BF9AA	Calmodulin-binding protein%3B IPR012416 (Calmodulin binding protein-like)
Down	Aradu.RF6Z3	Calmodulin-binding protein%3B IPR012416 (Calmodulin binding protein-like)
Down	Aradu.7N1F7	Calmodulin-binding protein%3B IPR012416 (Calmodulin binding protein-like)
Down	Aradu.X3GYY	Calmodulin-binding protein%3B IPR012416 (Calmodulin binding protein-like)
Down	Aradu.YWN5L	calmodulin-binding protein-related
Down	Araip.ZIC7C	calmodulin-binding protein-related
Down	Araip.74ZFI	calmodulin-binding transcription activator%3B IPR000048 (IQ motif%2C EF-hand binding site)%2C IPR005559 (CG-1 DNA-binding domain)%2C IPR013783 (Immunoglobulin-like fold)%2C IPR014756 (Immunoglobulin E-set)%2C IPR020683 (Ankyrin repeat-containing domain)%2C IPR027417 (P-loop containing nucleoside triphosphate hydrolase)%3B GO:0003677 (DNA binding)%2C GO:0005515 (protein binding)%2C GO:0005634 (nuc…
Down	Aradu.59RNH	Calreticulin 2%2C calcium-binding protein n%3D1 Tax%3DCoccomyxa subellipsoidea C-169 RepID%3DI0YTB6_9CHLO%3B IPR001580 (Calreticulin/calnexin)%2C IPR008985 (Concanavalin A-like lectin/glucanases superfamily)%3B GO:0005509 (calcium ion binding)%2C GO:0005515 (protein binding)%2C GO:0005783 (endoplasmic reticulum)%2C GO:0006457 (protein folding)%2C GO:0051082 (unfolded protein binding)
Down	Aradu.YP8K9	CAP (Cysteine-rich secretory proteins%2C Antigen 5%2C and Pathogenesis-related 1 protein) superfamily protein%3B IPR001283 (Cysteine-rich secretory protein%2C allergen V5/Tpx-1-related)
Down	Araip.S7ZKF	carbon catabolite repressor-like protein
Down	Araip.CL739	carbonic anhydrase 2%3B IPR001765 (Carbonic anhydrase)%3B GO:0004089 (carbonate dehydratase activity)%2C GO:0008270 (zinc ion binding)
Down	Araip.9VF4J	cardiolipin synthase%3B IPR000462 (CDP-alcohol phosphatidyltransferase)%3B GO:0008654 (phospholipid biosynthetic process)%2C GO:0016020 (membrane)
Down	Aradu.FZZ3Q	casein kinase alpha 1%3B IPR011009 (Protein kinase-like domain)%3B GO:0004672 (protein kinase activity)%2C GO:0005524 (ATP binding)%2C GO:0006468 (protein phosphorylation)
Up	Aradu.Z86H5	CASP-like protein 7 [Glycine max]%3B IPR006702 (Uncharacterised protein family UPF0497%2C trans-membrane plant)
Down	Araip.K90VM	Catalytic/ protein phosphatase type 2C/ protein serine/threonine phosphatase n%3D6 Tax%3DPanicoideae RepID%3DB6TEB8_MAIZE%3B IPR001932 (Protein phosphatase 2C (PP2C)-like domain)%2C IPR015655 (Protein phosphatase 2C)%3B GO:0003824 (catalytic activity)%2C GO:0004722 (protein serine/threonine phosphatase activity)%2C GO:0006470 (protein dephosphorylation)
Down	Aradu.KY185	cation/H+ exchanger 18%3B IPR006153 (Cation/H+ exchanger)%2C IPR014729 (Rossmann-like alpha/beta/alpha sandwich fold)%3B GO:0006812 (cation transport)%2C GO:0015299 (solute:hydrogen antiporter activity)%2C GO:0016021 (integral component of membrane)%2C GO:0055085 (transmembrane transport)
Down	Aradu.UI0XD	cationic amino acid transporter 5%3B IPR002293 (Amino acid/polyamine transporter I)%3B GO:0003333 (amino acid transmembrane transport)%2C GO:0015171 (amino acid transmembrane transporter activity)%2C GO:0016020 (membrane)
Down	Aradu.4N3TL	cationic amino acid transporter 6%3B IPR002293 (Amino acid/polyamine transporter I)%3B GO:0003333 (amino acid transmembrane transport)%2C GO:0015171 (amino acid transmembrane transporter activity)%2C GO:0016020 (membrane)
Down	Aradu.E80AX	cation-transporting ATPase%2C putative%3B IPR001757 (Cation-transporting P-type ATPase)%2C IPR023214 (HAD-like domain)%3B GO:0000166 (nucleotide binding)%2C GO:0006812 (cation transport)%2C GO:0016021 (integral component of membrane)%2C GO:0016887 (ATPase activity)%2C GO:0019829 (cation-transporting ATPase activity)%2C GO:0046872 (metal ion binding)
Up	Araip.G61N8	CBL-interacting protein kinase 2-like [Glycine max]%3B IPR011009 (Protein kinase-like domain)%3B GO:0004672 (protein kinase activity)%2C GO:0005524 (ATP binding)%2C GO:0006468 (protein phosphorylation)
Up	Aradu.DJZ9J	CBS domain-containing protein CBSX1%2C chloroplastic-like [Glycine max]%3B IPR000644 (CBS domain)%3B GO:0030554 (adenyl nucleotide binding)
Down	Aradu.T720W	CBS domain-containing protein%3B IPR000644 (CBS domain)%3B GO:0030554 (adenyl nucleotide binding)
Up	Aradu.337PG	CDGSH iron-sulfur domain protein%3B IPR018967 (Iron sulphur-containing domain%2C CDGSH-type)%3B GO:0043231 (intracellular membrane-bounded organelle)
Down	Aradu.U2CEK	CDT1-like protein a%2C chloroplastic-like [Glycine max]%3B IPR014939 (CDT1 Geminin-binding domain-like)
Down	Aradu.KVT23	Cell cycle regulated microtubule associated protein%3B IPR027330 (TPX2 central domain)
Up	Aradu.A8JWX	cell division FtsZ-like protein%3B IPR000158 (Cell division protein FtsZ)%3B GO:0003924 (GTPase activity)%2C GO:0005525 (GTP binding)%2C GO:0005737 (cytoplasm)%2C GO:0006184 (GTP catabolic process)%2C GO:0043234 (protein complex)%2C GO:0051258 (protein polymerization)
Down	Aradu.KJE7Z	Cell wall protein EXP2 n%3D1 Tax%3DMirabilis jalapa RepID%3DQ84L40_MIRJA%3B IPR007118 (Expansin/Lol pI)%3B GO:0005576 (extracellular region)%2C GO:0009664 (plant-type cell wall organization)
Down	Aradu.VK4A9	cell wall protein IFF6-like isoform X2 [Glycine max]
Down	Aradu.T6VPT	Cell wall protein-like n%3D3 Tax%3DOryza RepID%3DQ8H3Y9_ORYSJ%3B IPR006918 (COBRA%2C plant)%3B GO:0010215 (cellulose microfibril organization)%2C GO:0016049 (cell growth)%2C GO:0031225 (anchored component of membrane)
Up	Aradu.6X9W9	Cellular nucleic acid-binding protein n%3D1 Tax%3DColletotrichum higginsianum (strain IMI 349063) RepID%3DH1V8L0_COLHI%3B IPR001305 (Heat shock protein DnaJ%2C cysteine-rich domain)%2C IPR001878 (Zinc finger%2C CCHC-type)%3B GO:0003676 (nucleic acid binding)%2C GO:0008270 (zinc ion binding)%2C GO:0031072 (heat shock protein binding)%2C GO:0051082 (unfolded protein binding)
Down	Aradu.RCQ63	Cellulase (glycosyl hydrolase family 5) protein%3B IPR000772 (Ricin B lectin domain)%2C IPR017853 (Glycoside hydrolase%2C superfamily)%3B GO:0005975 (carbohydrate metabolic process)
Up	Aradu.J8CE9	cellulose synthase 1%3B IPR004827 (Basic-leucine zipper domain)%2C IPR013083 (Zinc finger%2C RING/FYVE/PHD-type)%3B GO:0003700 (sequence-specific DNA binding transcription factor activity)%2C GO:0043565 (sequence-specific DNA binding)
Up	Araip.95LB8	cellulose synthase 1%3B IPR004827 (Basic-leucine zipper domain)%2C IPR013083 (Zinc finger%2C RING/FYVE/PHD-type)%3B GO:0003700 (sequence-specific DNA binding transcription factor activity)%2C GO:0043565 (sequence-specific DNA binding)
Down	Araip.B3VTP	cellulose synthase 1%3B IPR013083 (Zinc finger%2C RING/FYVE/PHD-type)
Up	Aradu.7Q819	cellulose synthase 6%3B IPR005150 (Cellulose synthase)%2C IPR013083 (Zinc finger%2C RING/FYVE/PHD-type)%3B GO:0016020 (membrane)%2C GO:0016760 (cellulose synthase (UDP-forming) activity)%2C GO:0030244 (cellulose biosynthetic process)
Down	Aradu.M7K9G	cellulose synthase like E1%3B IPR005150 (Cellulose synthase)%3B GO:0016020 (membrane)%2C GO:0016760 (cellulose synthase (UDP-forming) activity)%2C GO:0030244 (cellulose biosynthetic process)
Up	Aradu.L5GC6	cellulose synthase like G1%3B IPR005150 (Cellulose synthase)%3B GO:0016020 (membrane)%2C GO:0016760 (cellulose synthase (UDP-forming) activity)%2C GO:0030244 (cellulose biosynthetic process)
Down	Aradu.77WYF	cellulose synthase like G2%3B IPR005150 (Cellulose synthase)%3B GO:0016020 (membrane)%2C GO:0016760 (cellulose synthase (UDP-forming) activity)%2C GO:0030244 (cellulose biosynthetic process)
Up	Araip.S9K2V	cellulose synthase-like A3
Up	Araip.2F6X3	cellulose synthase-like B4%3B IPR005150 (Cellulose synthase)%3B GO:0016020 (membrane)%2C GO:0016760 (cellulose synthase (UDP-forming) activity)%2C GO:0030244 (cellulose biosynthetic process)
Down	Aradu.PG2U7	chalcone synthase [Glycine max]%3B IPR011141 (Polyketide synthase%2C type III)%2C IPR016039 (Thiolase-like)%3B GO:0003824 (catalytic activity)%2C GO:0008152 (metabolic process)%2C GO:0009058 (biosynthetic process)
Down	Aradu.K2677	chalcone synthase [Glycine max]%3B IPR011141 (Polyketide synthase%2C type III)%2C IPR016039 (Thiolase-like)%3B GO:0003824 (catalytic activity)%2C GO:0008152 (metabolic process)%2C GO:0009058 (biosynthetic process)
Up	Aradu.F4M5D	chalcone synthase [Glycine max]%3B IPR011141 (Polyketide synthase%2C type III)%2C IPR016039 (Thiolase-like)%3B GO:0003824 (catalytic activity)%2C GO:0008152 (metabolic process)%2C GO:0009058 (biosynthetic process)
Up	Aradu.YC5B5	chalcone synthase [Glycine max]%3B IPR011141 (Polyketide synthase%2C type III)%2C IPR016039 (Thiolase-like)%3B GO:0003824 (catalytic activity)%2C GO:0008152 (metabolic process)%2C GO:0009058 (biosynthetic process)
Down	Aradu.LZ0RH	chalcone synthase [Glycine max]%3B IPR011141 (Polyketide synthase%2C type III)%2C IPR016039 (Thiolase-like)%3B GO:0003824 (catalytic activity)%2C GO:0008152 (metabolic process)%2C GO:0009058 (biosynthetic process)
Down	Aradu.H9IK5	chalcone synthase [Glycine max]%3B IPR011141 (Polyketide synthase%2C type III)%2C IPR016039 (Thiolase-like)%3B GO:0003824 (catalytic activity)%2C GO:0008152 (metabolic process)%2C GO:0009058 (biosynthetic process)
Up	Aradu.J6XSM	chalcone synthase [Glycine max]%3B IPR011141 (Polyketide synthase%2C type III)%2C IPR016039 (Thiolase-like)%3B GO:0003824 (catalytic activity)%2C GO:0008152 (metabolic process)%2C GO:0009058 (biosynthetic process)
Down	Aradu.9BM9J	chalcone synthase [Glycine max]%3B IPR011141 (Polyketide synthase%2C type III)%2C IPR016039 (Thiolase-like)%3B GO:0003824 (catalytic activity)%2C GO:0008152 (metabolic process)%2C GO:0009058 (biosynthetic process)
Down	Aradu.51F84	chalcone synthase [Glycine max]%3B IPR011141 (Polyketide synthase%2C type III)%2C IPR016039 (Thiolase-like)%3B GO:0003824 (catalytic activity)%2C GO:0008152 (metabolic process)%2C GO:0009058 (biosynthetic process)
Down	Araip.9Z32Z	chalcone synthase [Glycine max]%3B IPR016039 (Thiolase-like)%3B GO:0003824 (catalytic activity)%2C GO:0008152 (metabolic process)%2C GO:0009058 (biosynthetic process)
Down	Araip.QB1YM	chalcone synthase [Glycine max]%3B IPR016039 (Thiolase-like)%3B GO:0003824 (catalytic activity)%2C GO:0008152 (metabolic process)%2C GO:0009058 (biosynthetic process)
Up	Araip.RPE5K	Chalcone-flavanone isomerase family protein%3B IPR016087 (Chalcone isomerase)%3B GO:0009813 (flavonoid biosynthetic process)%2C GO:0016872 (intramolecular lyase activity)%2C GO:0045430 (chalcone isomerase activity)
Up	Aradu.C4KGF	chalcone-flavanone isomerase family protein%3B IPR016087 (Chalcone isomerase)%3B GO:0009813 (flavonoid biosynthetic process)%2C GO:0016872 (intramolecular lyase activity)%2C GO:0045430 (chalcone isomerase activity)
Up	Aradu.MJW1C	Chaperone DnaJ-domain superfamily protein%3B IPR001305 (Heat shock protein DnaJ%2C cysteine-rich domain)%2C IPR001623 (DnaJ domain)%2C IPR002939 (Chaperone DnaJ%2C C-terminal)%3B GO:0006457 (protein folding)%2C GO:0031072 (heat shock protein binding)%2C GO:0051082 (unfolded protein binding)
Up	Aradu.1DT27	Chaperone DnaJ-domain superfamily protein%3B IPR001623 (DnaJ domain)
Up	Aradu.SCK30	Chaperonin-like RbcX protein%3B IPR003435 (Chaperonin-like RbcX)
Down	Aradu.1BC5C	chitinase A%3B IPR017853 (Glycoside hydrolase%2C superfamily)%3B GO:0005975 (carbohydrate metabolic process)
Down	Aradu.85D80	chitinase-like protein PB1E7.04c-like isoform X1 [Glycine max]
Up	Aradu.6NT7E	Chl synthetase n%3D1 Tax%3DGuillardia theta CCMP2712 RepID%3DL1IGQ0_GUITH%3B IPR000537 (UbiA prenyltransferase family)%3B GO:0004659 (prenyltransferase activity)%2C GO:0015995 (chlorophyll biosynthetic process)%2C GO:0016021 (integral component of membrane)%2C GO:0046408 (chlorophyll synthetase activity)
Down	Aradu.9K33U	Chl synthetase n%3D1 Tax%3DGuillardia theta CCMP2712 RepID%3DL1IGQ0_GUITH%3B IPR000537 (UbiA prenyltransferase family)%3B GO:0004659 (prenyltransferase activity)%2C GO:0015995 (chlorophyll biosynthetic process)%2C GO:0016021 (integral component of membrane)%2C GO:0046408 (chlorophyll synthetase activity)
Up	Aradu.T7RQJ	chloride channel C%3B IPR002251 (Chloride channel ClC-plant)%2C IPR019328 (GPI-GlcNAc transferase complex%2C PIG-H component%2C conserved domain)%3B GO:0005216 (ion channel activity)%2C GO:0005247 (voltage-gated chloride channel activity)%2C GO:0006821 (chloride transport)%2C GO:0016020 (membrane)%2C GO:0017176 (phosphatidylinositol N-acetylglucosaminyltransferase activity)%2C GO:0055085 (transme…
Up	Aradu.J9JP2	chlorophyll A/B binding protein 1%3B IPR022796 (Chlorophyll A-B binding protein)%2C IPR023329 (Chlorophyll a/b binding protein domain)%3B GO:0016020 (membrane)
Up	Aradu.1M2X1	chlorophyll A/B binding protein 1%3B IPR022796 (Chlorophyll A-B binding protein)%2C IPR023329 (Chlorophyll a/b binding protein domain)%3B GO:0016020 (membrane)
Up	Aradu.TS7XP	chlorophyllase 2%3B IPR010821 (Chlorophyllase)%3B GO:0015996 (chlorophyll catabolic process)%2C GO:0047746 (chlorophyllase activity)
Up	Aradu.E7VJM	chlorophyllide A oxygenase%3B IPR013626 (Pheophorbide a oxygenase)%3B GO:0010277 (chlorophyllide a oxygenase [overall] activity)%2C GO:0055114 (oxidation-reduction process)
Up	Araip.IZW7B	chloroplast envelope membrane protein-like isoform X2 [Glycine max]%3B IPR002325 (Cytochrome f)%2C IPR004282 (Chloroplast envelope membrane protein%2C CemA)%2C IPR024058 (Cytochrome f transmembrane anchor)%2C IPR024094 (Cytochrome f large domain)%3B GO:0005506 (iron ion binding)%2C GO:0009055 (electron carrier activity)%2C GO:0015979 (photosynthesis)%2C GO:0016021 (integral component of membrane)…
Up	Aradu.KJ4N7	choline kinase 1%3B IPR011009 (Protein kinase-like domain)
Down	Aradu.IC2R8	chorismate mutase 1%3B IPR008238 (Chorismate mutase%2C AroQ class%2C eukaryotic type)%3B GO:0004106 (chorismate mutase activity)%2C GO:0009073 (aromatic amino acid family biosynthetic process)%2C GO:0046417 (chorismate metabolic process)
Down	Aradu.8AE4C	chromosome transmission fidelity protein%3B IPR027417 (P-loop containing nucleoside triphosphate hydrolase)%3B GO:0000166 (nucleotide binding)%2C GO:0005524 (ATP binding)%2C GO:0017111 (nucleoside-triphosphatase activity)
Up	Aradu.V8KPM	cinnamyl alcohol dehydrogenase 6%3B IPR002085 (Alcohol dehydrogenase superfamily%2C zinc-type)%2C IPR016040 (NAD(P)-binding domain)%2C IPR020843 (Polyketide synthase%2C enoylreductase)%3B GO:0008270 (zinc ion binding)%2C GO:0016491 (oxidoreductase activity)%2C GO:0055114 (oxidation-reduction process)
Up	Aradu.N0F3U	Class I glutamine amidotransferase-like superfamily protein%3B IPR011697 (Peptidase C26)%3B GO:0006541 (glutamine metabolic process)%2C GO:0016787 (hydrolase activity)
Down	Aradu.H129B	Class I glutamine amidotransferase-like superfamily protein%3B IPR017926 (Glutamine amidotransferase)
Up	Aradu.Q8BYL	Clathrin light chain protein%3B IPR000996 (Clathrin light chain)%3B GO:0005198 (structural molecule activity)%2C GO:0006886 (intracellular protein transport)%2C GO:0016192 (vesicle-mediated transport)%2C GO:0030130 (clathrin coat of trans-Golgi network vesicle)%2C GO:0030132 (clathrin coat of coated pit)
Down	Aradu.CU6BX	Clathrin%2C heavy chain%3B IPR016341 (Clathrin%2C heavy chain)%3B GO:0005198 (structural molecule activity)%2C GO:0005488 (binding)%2C GO:0005515 (protein binding)%2C GO:0006886 (intracellular protein transport)%2C GO:0016192 (vesicle-mediated transport)%2C GO:0030130 (clathrin coat of trans-Golgi network vesicle)%2C GO:0030132 (clathrin coat of coated pit)
Down	Araip.29PSV	Clathrin%2C heavy chain%3B IPR016341 (Clathrin%2C heavy chain)%3B GO:0005198 (structural molecule activity)%2C GO:0005488 (binding)%2C GO:0005515 (protein binding)%2C GO:0006886 (intracellular protein transport)%2C GO:0016192 (vesicle-mediated transport)%2C GO:0030130 (clathrin coat of trans-Golgi network vesicle)%2C GO:0030132 (clathrin coat of coated pit)
Up	Aradu.5X3QA	Cobalamin biosynthesis CobW-like protein%3B IPR003495 (CobW/HypB/UreG domain)%2C IPR011629 (Cobalamin (vitamin B12) biosynthesis CobW-like%2C C-terminal)%2C IPR027417 (P-loop containing nucleoside triphosphate hydrolase)
Down	Aradu.K66VF	Coiled-coil domain-containing protein 25 n%3D17 Tax%3DEutheria RepID%3DCCD25_HUMAN%3B IPR008532 (Domain of unknown function DUF814)
Up	Aradu.XIQ3W	Cold acclimation protein WCOR413 family%3B IPR008892 (Cold acclimation WCOR413)
Down	Araip.WJX5E	cold-regulated 413 plasma membrane protein 2-like [Glycine max]%3B IPR008892 (Cold acclimation WCOR413)
Up	Aradu.60UHZ	complex 1 protein%2C LYR family protein%3B IPR008011 (Complex 1 LYR protein)
Down	Aradu.1X2PC	component of high affinity nitrate transporter%3B IPR016605 (Transporter%2C high affinity nitrate%2C Nar2)
Up	Araip.GS23E	condensation domain protein
Down	Aradu.FH2AB	condensin complex subunit 1%3B IPR016024 (Armadillo-type fold)%2C IPR024324 (Condensin complex%2C subunit 1%2C N-terminal)%2C IPR026003 (HEAT repeat associated with sister chromatid cohesion protein)%2C IPR026971 (Condensin subunit 1/Condensin-2 complex subunit D3)%3B GO:0005488 (binding)%2C GO:0005634 (nucleus)%2C GO:0007067 (mitosis)%2C GO:0007076 (mitotic chromosome condensation)%2C GO:0030261…
Down	Aradu.ZPL5X	condensin complex subunit 3-like isoform X1 [Glycine max]%3B IPR016024 (Armadillo-type fold)%2C IPR025977 (Nuclear condensin complex subunit 3%2C C-terminal domain)%2C IPR027165 (Condensin complex subunit 3)%3B GO:0000796 (condensin complex)%2C GO:0005488 (binding)%2C GO:0007076 (mitotic chromosome condensation)
Down	Aradu.BV641	condensin-2 complex subunit G2%2C putative%3B IPR016024 (Armadillo-type fold)%2C IPR024741 (Condensin-2 complex subunit G2)%3B GO:0005488 (binding)%2C GO:0005634 (nucleus)
Down	Aradu.FR57X	conserved oligomeric Golgi complex subunit 3-like isoform X1 [Glycine max]%3B IPR007265 (Conserved oligomeric Golgi complex%2C subunit 3)%2C IPR016159 (Cullin repeat-like-containing domain)%3B GO:0005801 (cis-Golgi network)%2C GO:0006886 (intracellular protein transport)%2C GO:0016020 (membrane)
Up	Aradu.D2507	COP1-interacting protein 7
Up	Aradu.UF1FY	Copper amine oxidase family protein%3B IPR000269 (Copper amine oxidase)%3B GO:0005507 (copper ion binding)%2C GO:0008131 (primary amine oxidase activity)%2C GO:0009308 (amine metabolic process)%2C GO:0048038 (quinone binding)%2C GO:0055114 (oxidation-reduction process)
Down	Aradu.20AVJ	copper/zinc superoxide dismutase 2%3B IPR001424 (Superoxide dismutase%2C copper/zinc binding domain)%3B GO:0006801 (superoxide metabolic process)%2C GO:0046872 (metal ion binding)%2C GO:0055114 (oxidation-reduction process)
Up	Aradu.G0FGB	Coproporphyrinogen III oxidase%3B IPR001260 (Coproporphyrinogen III oxidase%2C aerobic)%3B GO:0004109 (coproporphyrinogen oxidase activity)%2C GO:0006779 (porphyrin-containing compound biosynthetic process)%2C GO:0055114 (oxidation-reduction process)
Down	Aradu.841T9	Core-2/I-branching beta-1%2C6-N-acetylglucosaminyltransferase family protein%3B IPR003406 (Glycosyl transferase%2C family 14)%3B GO:0008375 (acetylglucosaminyltransferase activity)%2C GO:0016020 (membrane)
Down	Aradu.F5NV3	Core-2/I-branching beta-1%2C6-N-acetylglucosaminyltransferase family protein%3B IPR003406 (Glycosyl transferase%2C family 14)%3B GO:0008375 (acetylglucosaminyltransferase activity)%2C GO:0016020 (membrane)
Up	Aradu.ZN7FN	Core-2/I-branching beta-1%2C6-N-acetylglucosaminyltransferase family protein%3B IPR003406 (Glycosyl transferase%2C family 14)%3B GO:0008375 (acetylglucosaminyltransferase activity)%2C GO:0016020 (membrane)
Up	Aradu.9T6Y6	CRT (chloroquine-resistance transporter)-like transporter 3
Up	Aradu.8V7CS	C-terminal processing peptidase subfamily n%3D1 Tax%3DSynechococcus sp. PCC 7335 RepID%3DB4WIR7_9SYNE%3B IPR004447 (C-terminal-processing peptidase S41A)%3B GO:0005515 (protein binding)%2C GO:0006508 (proteolysis)%2C GO:0008236 (serine-type peptidase activity)
Down	Aradu.LI9R7	CTP synthase family protein%3B IPR004468 (CTP synthase)%2C IPR027417 (P-loop containing nucleoside triphosphate hydrolase)%3B GO:0003883 (CTP synthase activity)%2C GO:0006221 (pyrimidine nucleotide biosynthetic process)
Up	Araip.RP1NL	CTV.20 n%3D1 Tax%3DPoncirus trifoliata RepID%3DQ8H6Q8_PONTR
Up	Aradu.H7UJ8	CTV.20 n%3D1 Tax%3DPoncirus trifoliata RepID%3DQ8H6Q8_PONTR
Down	Araip.CA6CA	Cupin%2C RmlC-type n%3D3 Tax%3DPanicoideae RepID%3DB6UEW5_MAIZE%3B IPR014710 (RmlC-like jelly roll fold)
Up	Aradu.FQ240	cupredoxin superfamily protein%2C putative%3B IPR008972 (Cupredoxin)
Up	Aradu.B1ZF5	cyanate hydratase [Glycine max]%3B IPR003712 (Cyanate lyase%2C C-terminal)%3B GO:0009439 (cyanate metabolic process)
Up	Aradu.0L6XH	cyclic nucleotide gated channel 19%3B IPR014710 (RmlC-like jelly roll fold)
Down	Aradu.9M2XX	cyclin a2%3B 1%3B IPR014400 (Cyclin A/B/D/E/F)%3B GO:0000079 (regulation of cyclin-dependent protein serine/threonine kinase activity)%2C GO:0005634 (nucleus)%2C GO:0010389 (regulation of G2/M transition of mitotic cell cycle)%2C GO:0019901 (protein kinase binding)%2C GO:0051726 (regulation of cell cycle)
Down	Aradu.YV0Y1	Cyclin A3%3B 1%3B IPR014400 (Cyclin A/B/D/E/F)%3B GO:0000079 (regulation of cyclin-dependent protein serine/threonine kinase activity)%2C GO:0005634 (nucleus)%2C GO:0010389 (regulation of G2/M transition of mitotic cell cycle)%2C GO:0019901 (protein kinase binding)%2C GO:0051726 (regulation of cell cycle)
Down	Aradu.X77WJ	cyclin b3%3B 1%3B IPR013763 (Cyclin-like)
Down	Aradu.3XI0L	CYCLIN D3%3B 1%3B IPR015451 (Cyclin D)%3B GO:0005634 (nucleus)%2C GO:0007049 (cell cycle)
Down	Aradu.37VA0	cyclin-D1-1-like [Glycine max]%3B IPR015451 (Cyclin D)%3B GO:0005634 (nucleus)%2C GO:0007049 (cell cycle)
Down	Aradu.PJ1DH	Cyclophilin-like peptidyl-prolyl cis-trans isomerase family protein%3B IPR002130 (Cyclophilin-type peptidyl-prolyl cis-trans isomerase domain)%2C IPR011990 (Tetratricopeptide-like helical)%3B GO:0003755 (peptidyl-prolyl cis-trans isomerase activity)%2C GO:0005515 (protein binding)%2C GO:0006457 (protein folding)
Up	Aradu.CYS3J	Cyclophilin-like peptidyl-prolyl cis-trans isomerase family protein%3B IPR002130 (Cyclophilin-type peptidyl-prolyl cis-trans isomerase domain)%2C IPR023222 (PsbQ-like domain)%3B GO:0003755 (peptidyl-prolyl cis-trans isomerase activity)%2C GO:0006457 (protein folding)
Up	Aradu.VQS6V	Cyclophilin-like peptidyl-prolyl cis-trans isomerase family protein%3B IPR002130 (Cyclophilin-type peptidyl-prolyl cis-trans isomerase domain)%2C IPR024936 (Cyclophilin-type peptidyl-prolyl cis-trans isomerase)%3B GO:0003755 (peptidyl-prolyl cis-trans isomerase activity)%2C GO:0006457 (protein folding)
Up	Aradu.041TI	Cyclophilin-like peptidyl-prolyl cis-trans isomerase family protein%3B IPR002130 (Cyclophilin-type peptidyl-prolyl cis-trans isomerase domain)%3B GO:0003755 (peptidyl-prolyl cis-trans isomerase activity)%2C GO:0006457 (protein folding)
Up	Araip.99CHV	Cyclopropane-fatty-acyl-phospholipid synthase%3B IPR003333 (Mycolic acid cyclopropane synthase)%3B GO:0008610 (lipid biosynthetic process)
Up	Aradu.AFA68	Cyclopropane-fatty-acyl-phospholipid synthase%3B IPR003333 (Mycolic acid cyclopropane synthase)%3B GO:0008610 (lipid biosynthetic process)
Up	Aradu.BI22D	Cyclopropane-fatty-acyl-phospholipid synthase%3B IPR003333 (Mycolic acid cyclopropane synthase)%3B GO:0008610 (lipid biosynthetic process)
Up	Aradu.79ULU	Cyclopropane-fatty-acyl-phospholipid synthase%3B IPR003333 (Mycolic acid cyclopropane synthase)%3B GO:0008610 (lipid biosynthetic process)
Down	Aradu.W013I	cystathionine gamma-synthase%3B IPR000277 (Cys/Met metabolism%2C pyridoxal phosphate-dependent enzyme)%2C IPR015424 (Pyridoxal phosphate-dependent transferase)%3B GO:0003824 (catalytic activity)%2C GO:0030170 (pyridoxal phosphate binding)
Up	Aradu.Q6CRV	Cysteine proteinases superfamily protein%3B IPR013128 (Peptidase C1A)%3B GO:0006508 (proteolysis)%2C GO:0008234 (cysteine-type peptidase activity)
Down	Aradu.XD25G	cysteine-rich receptor-like protein kinase 29-like [Glycine max]%3B IPR002902 (Gnk2-homologous domain)
Down	Aradu.98NSS	cysteine-rich RLK (RECEPTOR-like protein kinase) 25%3B IPR002902 (Gnk2-homologous domain)%2C IPR011009 (Protein kinase-like domain)%2C IPR013094 (Alpha/beta hydrolase fold-3)%2C IPR013320 (Concanavalin A-like lectin/glucanase%2C subgroup)%3B GO:0004672 (protein kinase activity)%2C GO:0005524 (ATP binding)%2C GO:0006468 (protein phosphorylation)%2C GO:0008152 (metabolic process)%2C GO:0016787 (hyd…
Down	Aradu.LRS1M	cysteine-rich RLK (RECEPTOR-like protein kinase) 25%3B IPR002902 (Gnk2-homologous domain)%2C IPR011009 (Protein kinase-like domain)%2C IPR013320 (Concanavalin A-like lectin/glucanase%2C subgroup)%3B GO:0004672 (protein kinase activity)%2C GO:0005524 (ATP binding)%2C GO:0006468 (protein phosphorylation)
Up	Aradu.UMK1N	cytochrome B561-1%3B IPR004877 (Cytochrome b561%2C eukaryote)%3B GO:0016021 (integral component of membrane)
Up	Araip.296S2	cytochrome B561-1%3B IPR004877 (Cytochrome b561%2C eukaryote)%3B GO:0016021 (integral component of membrane)
Up	Araip.LA2BG	cytochrome B561-1%3B IPR004877 (Cytochrome b561%2C eukaryote)%3B GO:0016021 (integral component of membrane)
Up	Aradu.8X6B9	cytochrome B561-1%3B IPR004877 (Cytochrome b561%2C eukaryote)%3B GO:0016021 (integral component of membrane)
Up	Aradu.CCG5S	cytochrome b6f complex subunit (petM)%2C putative%3B IPR012595 (PetM of cytochrome b6/f complex subunit 7)%3B GO:0009512 (cytochrome b6f complex)
Up	Araip.59HIL	Cytochrome c%3B IPR009056 (Cytochrome c-like domain)%3B GO:0009055 (electron carrier activity)%2C GO:0020037 (heme binding)
Up	Araip.RZ9J2	Cytochrome P450 superfamily protein%3B IPR001128 (Cytochrome P450)%3B GO:0004497 (monooxygenase activity)%2C GO:0005506 (iron ion binding)%2C GO:0020037 (heme binding)%2C GO:0055114 (oxidation-reduction process)
Down	Araip.WM0UU	Cytochrome P450 superfamily protein%3B IPR001128 (Cytochrome P450)%3B GO:0004497 (monooxygenase activity)%2C GO:0005506 (iron ion binding)%2C GO:0020037 (heme binding)%2C GO:0055114 (oxidation-reduction process)
Up	Aradu.LM4BA	Cytochrome P450 superfamily protein%3B IPR001128 (Cytochrome P450)%3B GO:0005506 (iron ion binding)%2C GO:0020037 (heme binding)%2C GO:0055114 (oxidation-reduction process)
Down	Aradu.2X14D	Cytochrome P450 superfamily protein%3B IPR001128 (Cytochrome P450)%3B GO:0005506 (iron ion binding)%2C GO:0020037 (heme binding)%2C GO:0055114 (oxidation-reduction process)
Up	Aradu.29H1P	Cytochrome P450 superfamily protein%3B IPR001128 (Cytochrome P450)%3B GO:0005506 (iron ion binding)%2C GO:0020037 (heme binding)%2C GO:0055114 (oxidation-reduction process)
Up	Aradu.MC661	Cytochrome P450 superfamily protein%3B IPR001128 (Cytochrome P450)%3B GO:0005506 (iron ion binding)%2C GO:0020037 (heme binding)%2C GO:0055114 (oxidation-reduction process)
Up	Aradu.7K3S8	Cytochrome P450 superfamily protein%3B IPR001128 (Cytochrome P450)%3B GO:0005506 (iron ion binding)%2C GO:0020037 (heme binding)%2C GO:0055114 (oxidation-reduction process)
Up	Aradu.6R69J	Cytochrome P450 superfamily protein%3B IPR001128 (Cytochrome P450)%3B GO:0005506 (iron ion binding)%2C GO:0020037 (heme binding)%2C GO:0055114 (oxidation-reduction process)
Up	Araip.417FY	Cytochrome P450 superfamily protein%3B IPR001128 (Cytochrome P450)%3B GO:0005506 (iron ion binding)%2C GO:0020037 (heme binding)%2C GO:0055114 (oxidation-reduction process)
Up	Araip.W8M42	Cytochrome P450 superfamily protein%3B IPR001128 (Cytochrome P450)%3B GO:0005506 (iron ion binding)%2C GO:0020037 (heme binding)%2C GO:0055114 (oxidation-reduction process)
Up	Araip.39H92	Cytochrome P450 superfamily protein%3B IPR001128 (Cytochrome P450)%3B GO:0005506 (iron ion binding)%2C GO:0020037 (heme binding)%2C GO:0055114 (oxidation-reduction process)
Up	Araip.VM0ZL	Cytochrome P450 superfamily protein%3B IPR001128 (Cytochrome P450)%3B GO:0005506 (iron ion binding)%2C GO:0020037 (heme binding)%2C GO:0055114 (oxidation-reduction process)
Up	Araip.TGF7T	Cytochrome P450 superfamily protein%3B IPR001128 (Cytochrome P450)%3B GO:0005506 (iron ion binding)%2C GO:0020037 (heme binding)%2C GO:0055114 (oxidation-reduction process)
Up	Araip.5EG7I	Cytochrome P450 superfamily protein%3B IPR001128 (Cytochrome P450)%3B GO:0005506 (iron ion binding)%2C GO:0020037 (heme binding)%2C GO:0055114 (oxidation-reduction process)
Up	Aradu.MRQ6G	Cytochrome P450 superfamily protein%3B IPR001128 (Cytochrome P450)%3B GO:0005506 (iron ion binding)%2C GO:0020037 (heme binding)%2C GO:0055114 (oxidation-reduction process)
Up	Aradu.99WG9	Cytochrome P450 superfamily protein%3B IPR001128 (Cytochrome P450)%3B GO:0005506 (iron ion binding)%2C GO:0020037 (heme binding)%2C GO:0055114 (oxidation-reduction process)
Down	Aradu.GA8EY	Cytochrome P450 superfamily protein%3B IPR001128 (Cytochrome P450)%3B GO:0005506 (iron ion binding)%2C GO:0020037 (heme binding)%2C GO:0055114 (oxidation-reduction process)
Up	Aradu.1Z30Z	Cytochrome P450 superfamily protein%3B IPR001128 (Cytochrome P450)%3B GO:0005506 (iron ion binding)%2C GO:0020037 (heme binding)%2C GO:0055114 (oxidation-reduction process)
Down	Aradu.10WEW	Cytochrome P450 superfamily protein%3B IPR001128 (Cytochrome P450)%3B GO:0005506 (iron ion binding)%2C GO:0020037 (heme binding)%2C GO:0055114 (oxidation-reduction process)
Down	Aradu.EF37G	Cytochrome P450 superfamily protein%3B IPR001128 (Cytochrome P450)%3B GO:0005506 (iron ion binding)%2C GO:0020037 (heme binding)%2C GO:0055114 (oxidation-reduction process)
Up	Aradu.1WD61	Cytochrome P450 superfamily protein%3B IPR001128 (Cytochrome P450)%3B GO:0005506 (iron ion binding)%2C GO:0020037 (heme binding)%2C GO:0055114 (oxidation-reduction process)
Up	Aradu.55VHH	Cytochrome P450 superfamily protein%3B IPR001128 (Cytochrome P450)%3B GO:0005506 (iron ion binding)%2C GO:0020037 (heme binding)%2C GO:0055114 (oxidation-reduction process)
Up	Aradu.KQ6NP	Cytochrome P450 superfamily protein%3B IPR001128 (Cytochrome P450)%3B GO:0005506 (iron ion binding)%2C GO:0020037 (heme binding)%2C GO:0055114 (oxidation-reduction process)
Up	Aradu.YXE38	Cytochrome P450 superfamily protein%3B IPR001128 (Cytochrome P450)%3B GO:0005506 (iron ion binding)%2C GO:0020037 (heme binding)%2C GO:0055114 (oxidation-reduction process)
Down	Aradu.75ICF	Cytochrome P450 superfamily protein%3B IPR001128 (Cytochrome P450)%3B GO:0005506 (iron ion binding)%2C GO:0020037 (heme binding)%2C GO:0055114 (oxidation-reduction process)
Up	Aradu.R8HR4	Cytochrome P450 superfamily protein%3B IPR001128 (Cytochrome P450)%3B GO:0005506 (iron ion binding)%2C GO:0020037 (heme binding)%2C GO:0055114 (oxidation-reduction process)
Up	Aradu.PQW7I	Cytochrome P450 superfamily protein%3B IPR001128 (Cytochrome P450)%3B GO:0005506 (iron ion binding)%2C GO:0020037 (heme binding)%2C GO:0055114 (oxidation-reduction process)
Up	Aradu.GT7IH	Cytochrome P450 superfamily protein%3B IPR001128 (Cytochrome P450)%3B GO:0005506 (iron ion binding)%2C GO:0020037 (heme binding)%2C GO:0055114 (oxidation-reduction process)
Down	Aradu.DB13D	Cytochrome P450 superfamily protein%3B IPR001128 (Cytochrome P450)%3B GO:0005506 (iron ion binding)%2C GO:0020037 (heme binding)%2C GO:0055114 (oxidation-reduction process)
Up	Aradu.8J2JE	Cytochrome P450 superfamily protein%3B IPR001128 (Cytochrome P450)%3B GO:0005506 (iron ion binding)%2C GO:0020037 (heme binding)%2C GO:0055114 (oxidation-reduction process)
Down	Aradu.4B6GH	Cytochrome P450 superfamily protein%3B IPR001128 (Cytochrome P450)%3B GO:0005506 (iron ion binding)%2C GO:0020037 (heme binding)%2C GO:0055114 (oxidation-reduction process)
Down	Aradu.1V1I5	Cytochrome P450 superfamily protein%3B IPR001128 (Cytochrome P450)%3B GO:0005506 (iron ion binding)%2C GO:0020037 (heme binding)%2C GO:0055114 (oxidation-reduction process)
Up	Aradu.XCD6I	Cytochrome P450 superfamily protein%3B IPR001128 (Cytochrome P450)%3B GO:0005506 (iron ion binding)%2C GO:0020037 (heme binding)%2C GO:0055114 (oxidation-reduction process)
Up	Aradu.W9H6F	Cytochrome P450 superfamily protein%3B IPR001128 (Cytochrome P450)%3B GO:0005506 (iron ion binding)%2C GO:0020037 (heme binding)%2C GO:0055114 (oxidation-reduction process)
Down	Aradu.TJ0ZU	Cytochrome P450 superfamily protein%3B IPR001128 (Cytochrome P450)%3B GO:0005506 (iron ion binding)%2C GO:0020037 (heme binding)%2C GO:0055114 (oxidation-reduction process)
Down	Aradu.UK6QI	Cytochrome P450 superfamily protein%3B IPR001128 (Cytochrome P450)%3B GO:0005506 (iron ion binding)%2C GO:0020037 (heme binding)%2C GO:0055114 (oxidation-reduction process)
Down	Aradu.IYW9D	Cytochrome P450 superfamily protein%3B IPR001128 (Cytochrome P450)%3B GO:0005506 (iron ion binding)%2C GO:0020037 (heme binding)%2C GO:0055114 (oxidation-reduction process)
Up	Aradu.LE6W1	Cytochrome P450 superfamily protein%3B IPR001128 (Cytochrome P450)%3B GO:0005506 (iron ion binding)%2C GO:0020037 (heme binding)%2C GO:0055114 (oxidation-reduction process)
Up	Aradu.2Y4F9	Cytochrome P450 superfamily protein%3B IPR001128 (Cytochrome P450)%3B GO:0005506 (iron ion binding)%2C GO:0020037 (heme binding)%2C GO:0055114 (oxidation-reduction process)
Up	Aradu.QX8KD	Cytochrome P450 superfamily protein%3B IPR001128 (Cytochrome P450)%3B GO:0005506 (iron ion binding)%2C GO:0020037 (heme binding)%2C GO:0055114 (oxidation-reduction process)
Up	Aradu.FA6IJ	Cytochrome P450 superfamily protein%3B IPR001128 (Cytochrome P450)%3B GO:0005506 (iron ion binding)%2C GO:0020037 (heme binding)%2C GO:0055114 (oxidation-reduction process)
Up	Aradu.W695A	Cytochrome P450 superfamily protein%3B IPR001128 (Cytochrome P450)%3B GO:0005506 (iron ion binding)%2C GO:0020037 (heme binding)%2C GO:0055114 (oxidation-reduction process)
Up	Aradu.G2TPD	Cytochrome P450 superfamily protein%3B IPR001128 (Cytochrome P450)%3B GO:0005506 (iron ion binding)%2C GO:0020037 (heme binding)%2C GO:0055114 (oxidation-reduction process)
Up	Aradu.MSX28	Cytochrome P450 superfamily protein%3B IPR001128 (Cytochrome P450)%3B GO:0005506 (iron ion binding)%2C GO:0020037 (heme binding)%2C GO:0055114 (oxidation-reduction process)
Up	Aradu.4B27D	Cytochrome P450 superfamily protein%3B IPR001128 (Cytochrome P450)%3B GO:0005506 (iron ion binding)%2C GO:0020037 (heme binding)%2C GO:0055114 (oxidation-reduction process)
Up	Aradu.AVR14	Cytochrome P450 superfamily protein%3B IPR001128 (Cytochrome P450)%3B GO:0005506 (iron ion binding)%2C GO:0020037 (heme binding)%2C GO:0055114 (oxidation-reduction process)
Down	Aradu.MK8Z3	Cytochrome P450 superfamily protein%3B IPR001128 (Cytochrome P450)%3B GO:0005506 (iron ion binding)%2C GO:0020037 (heme binding)%2C GO:0055114 (oxidation-reduction process)
Up	Aradu.WJ5JK	Cytochrome P450 superfamily protein%3B IPR001128 (Cytochrome P450)%3B GO:0005506 (iron ion binding)%2C GO:0020037 (heme binding)%2C GO:0055114 (oxidation-reduction process)
Up	Aradu.8J509	Cytochrome P450 superfamily protein%3B IPR001128 (Cytochrome P450)%3B GO:0005506 (iron ion binding)%2C GO:0020037 (heme binding)%2C GO:0055114 (oxidation-reduction process)
Up	Aradu.R6QT2	Cytochrome P450 superfamily protein%3B IPR001128 (Cytochrome P450)%3B GO:0005506 (iron ion binding)%2C GO:0020037 (heme binding)%2C GO:0055114 (oxidation-reduction process)
Up	Aradu.3KJ9A	cytochrome P450%2C family 718%3B IPR001128 (Cytochrome P450)%3B GO:0005506 (iron ion binding)%2C GO:0020037 (heme binding)%2C GO:0055114 (oxidation-reduction process)
Up	Aradu.VK6NM	cytochrome P450%2C family 718%3B IPR001128 (Cytochrome P450)%3B GO:0005506 (iron ion binding)%2C GO:0020037 (heme binding)%2C GO:0055114 (oxidation-reduction process)
Down	Aradu.901JV	cytochrome P450%2C family 98%2C subfamily A%2C polypeptide 3%3B IPR001128 (Cytochrome P450)%3B GO:0005506 (iron ion binding)%2C GO:0020037 (heme binding)%2C GO:0055114 (oxidation-reduction process)
Down	Araip.QP8NM	cytochrome P450%2C family 98%2C subfamily A%2C polypeptide 3%3B IPR001128 (Cytochrome P450)%3B GO:0005506 (iron ion binding)%2C GO:0020037 (heme binding)%2C GO:0055114 (oxidation-reduction process)
Down	Aradu.82DSF	cytokinin oxidase/dehydrogenase 1%3B IPR016164 (FAD-linked oxidase-like%2C C-terminal)%2C IPR016166 (FAD-binding%2C type 2)%2C IPR016170 (Vanillyl-alcohol oxidase/Cytokinin dehydrogenase C-terminal domain)%3B GO:0003824 (catalytic activity)%2C GO:0008762 (UDP-N-acetylmuramate dehydrogenase activity)%2C GO:0009690 (cytokinin metabolic process)%2C GO:0016491 (oxidoreductase activity)%2C GO:0019139 …
Down	Aradu.D11TE	cytokinin oxidase/dehydrogenase 1%3B IPR016164 (FAD-linked oxidase-like%2C C-terminal)%2C IPR016166 (FAD-binding%2C type 2)%2C IPR016170 (Vanillyl-alcohol oxidase/Cytokinin dehydrogenase C-terminal domain)%3B GO:0003824 (catalytic activity)%2C GO:0008762 (UDP-N-acetylmuramate dehydrogenase activity)%2C GO:0009690 (cytokinin metabolic process)%2C GO:0016491 (oxidoreductase activity)%2C GO:0019139 …
Up	Aradu.543MU	cytokinin oxidase/dehydrogenase 1%3B IPR016164 (FAD-linked oxidase-like%2C C-terminal)%2C IPR016166 (FAD-binding%2C type 2)%2C IPR016170 (Vanillyl-alcohol oxidase/Cytokinin dehydrogenase C-terminal domain)%3B GO:0003824 (catalytic activity)%2C GO:0008762 (UDP-N-acetylmuramate dehydrogenase activity)%2C GO:0009690 (cytokinin metabolic process)%2C GO:0016491 (oxidoreductase activity)%2C GO:0019139 …
Down	Aradu.R24NX	cytokinin riboside 5'-monophosphate phosphoribohydrolase LOG1 [Glycine max]%3B IPR005269 (Cytokinin riboside 5'-monophosphate phosphoribohydrolase LOG)
Down	Araip.6KM9Z	cytokinin riboside 5'-monophosphate phosphoribohydrolase LOG3-like [Glycine max]%3B IPR005269 (Cytokinin riboside 5'-monophosphate phosphoribohydrolase LOG)
Down	Araip.419MJ	cytospin-A-like isoform X3 [Glycine max]%3B IPR001567 (Peptidase M3A/M3B)%2C IPR024079 (Metallopeptidase%2C catalytic domain)%3B GO:0004222 (metalloendopeptidase activity)%2C GO:0006508 (proteolysis)%2C GO:0008237 (metallopeptidase activity)
Down	Araip.NBA78	dCTP pyrophosphatase 1-like [Glycine max]%3B IPR004518 (NTP pyrophosphohydrolase MazG%2C putative catalytic core)%2C IPR011394 (NTP Pyrophosphohydrolase MazG-related%2C RS21-C6)
Up	Aradu.8203M	DEAD-box ATP-dependent RNA helicase-like protein%3B IPR001650 (Helicase%2C C-terminal)%2C IPR001878 (Zinc finger%2C CCHC-type)%2C IPR012562 (GUCT)%2C IPR014001 (Helicase%2C superfamily 1/2%2C ATP-binding domain)%2C IPR027417 (P-loop containing nucleoside triphosphate hydrolase)%3B GO:0003676 (nucleic acid binding)%2C GO:0003723 (RNA binding)%2C GO:0004386 (helicase activity)%2C GO:0005524 (ATP bi…
Up	Aradu.CK6H7	Defensin related%3B IPR008176 (Gamma thionin)%3B GO:0006952 (defense response)
Up	Araip.PK5R5	dehydration-responsive protein RD22%3B IPR004873 (BURP domain)
Up	Aradu.75B78	dehydroascorbate reductase
Up	Aradu.C4BD6	dehydroascorbate reductase 1%3B IPR010987 (Glutathione S-transferase%2C C-terminal-like)%2C IPR012336 (Thioredoxin-like fold)%3B GO:0005515 (protein binding)
Up	Aradu.PI6VR	dehydroascorbate reductase 2%3B IPR010987 (Glutathione S-transferase%2C C-terminal-like)%2C IPR012336 (Thioredoxin-like fold)%3B GO:0005515 (protein binding)
Up	Aradu.L7EUR	delta-aminolevulinic acid dehydratase%3B IPR001731 (Porphobilinogen synthase)%2C IPR013785 (Aldolase-type TIM barrel)%3B GO:0003824 (catalytic activity)%2C GO:0004655 (porphobilinogen synthase activity)%2C GO:0033014 (tetrapyrrole biosynthetic process)%2C GO:0046872 (metal ion binding)
Up	Araip.IGY1J	dentin sialophosphoprotein-like isoform X2 [Glycine max]
Up	Aradu.EE16N	desmoplakin-like isoform X1 [Glycine max]%3B IPR007656 (Zein-binding domain)
Down	Aradu.E99UV	DHHC-type zinc finger family protein%3B IPR001594 (Zinc finger%2C DHHC-type%2C palmitoyltransferase)%3B GO:0008270 (zinc ion binding)
Up	Araip.3YS0S	diacylglycerol acyltransferase family%3B IPR007130 (Diacylglycerol acyltransferase)
Up	Araip.31MV0	diacylglycerol acyltransferase family%3B IPR007130 (Diacylglycerol acyltransferase)
Up	Aradu.6I2MF	diacylglycerol acyltransferase family%3B IPR007130 (Diacylglycerol acyltransferase)
Down	Aradu.5S7A7	diacylglycerol kinase 5%3B IPR016064 (ATP-NAD kinase-like domain)%2C IPR016961 (Diacylglycerol kinase%2C plant)%3B GO:0003951 (NAD+ kinase activity)%2C GO:0004143 (diacylglycerol kinase activity)%2C GO:0007205 (protein kinase C-activating G-protein coupled receptor signaling pathway)%2C GO:0008152 (metabolic process)
Down	Aradu.IFQ8D	Dicarboxylate transport 2.1 n%3D1 Tax%3DTheobroma cacao RepID%3DUPI00042B1C7A%3B IPR001898 (Sodium/sulphate symporter)%3B GO:0005215 (transporter activity)%2C GO:0006814 (sodium ion transport)%2C GO:0016020 (membrane)%2C GO:0055085 (transmembrane transport)
Down	Araip.S90CY	dicarboxylate transport 2.1%3B IPR001898 (Sodium/sulphate symporter)%3B GO:0005215 (transporter activity)%2C GO:0006814 (sodium ion transport)%2C GO:0016020 (membrane)%2C GO:0055085 (transmembrane transport)
Up	Araip.9R489	dicarboxylate transporter 1
Down	Aradu.632MM	dihydroflavonol 4-reductase%3B IPR001509 (NAD-dependent epimerase/dehydratase)%2C IPR016040 (NAD(P)-binding domain)%3B GO:0003824 (catalytic activity)%2C GO:0044237 (cellular metabolic process)%2C GO:0050662 (coenzyme binding)
Up	Aradu.ZTW7Y	dihydroflavonol 4-reductase%3B IPR001509 (NAD-dependent epimerase/dehydratase)%2C IPR016040 (NAD(P)-binding domain)%3B GO:0003824 (catalytic activity)%2C GO:0044237 (cellular metabolic process)%2C GO:0050662 (coenzyme binding)
Up	Aradu.3KI43	dihydroflavonol 4-reductase%3B IPR001509 (NAD-dependent epimerase/dehydratase)%2C IPR016040 (NAD(P)-binding domain)%3B GO:0003824 (catalytic activity)%2C GO:0044237 (cellular metabolic process)%2C GO:0050662 (coenzyme binding)
Down	Araip.I11RB	disease resistance family protein / LRR family protein%3B IPR000767 (Disease resistance protein)%2C IPR027417 (P-loop containing nucleoside triphosphate hydrolase)%3B GO:0006952 (defense response)%2C GO:0043531 (ADP binding)
Down	Aradu.4N3HV	disease resistance family protein / LRR family protein%3B IPR000767 (Disease resistance protein)%2C IPR027417 (P-loop containing nucleoside triphosphate hydrolase)%3B GO:0006952 (defense response)%2C GO:0043531 (ADP binding)
Down	Araip.51JNY	Disease resistance protein (CC-NBS-LRR class) family
Down	Araip.J2Z71	disease resistance protein (CC-NBS-LRR class) family protein
Up	Araip.BQ0E3	disease resistance protein (CC-NBS-LRR class) family protein
Down	Araip.ZU8AU	disease resistance protein (CC-NBS-LRR class) family protein%3B IPR000767 (Disease resistance protein)%2C IPR027417 (P-loop containing nucleoside triphosphate hydrolase)%3B GO:0006952 (defense response)%2C GO:0043531 (ADP binding)
Down	Araip.RRU4D	disease resistance protein (CC-NBS-LRR class) family protein%3B IPR011579 (ATPase domain%2C prokaryote)%2C IPR027417 (P-loop containing nucleoside triphosphate hydrolase)%3B GO:0005524 (ATP binding)
Down	Aradu.615GS	Disease resistance protein (CC-NBS-LRR class) family%3B IPR000767 (Disease resistance protein)%2C IPR025875 (Leucine rich repeat 4)%2C IPR027417 (P-loop containing nucleoside triphosphate hydrolase)%3B GO:0006952 (defense response)%2C GO:0043531 (ADP binding)
Up	Araip.TZ9UD	Disease resistance protein (TIR-NBS-LRR class) family
Down	Aradu.W0UF5	Disease resistance protein (TIR-NBS-LRR class) family%3B IPR000157 (Toll/interleukin-1 receptor homology (TIR) domain)%2C IPR000767 (Disease resistance protein)%2C IPR001611 (Leucine-rich repeat)%2C IPR027417 (P-loop containing nucleoside triphosphate hydrolase)%3B GO:0005515 (protein binding)%2C GO:0006952 (defense response)%2C GO:0007165 (signal transduction)%2C GO:0043531 (ADP binding)
Down	Aradu.FN5H7	Disease resistance protein (TIR-NBS-LRR class) family%3B IPR000157 (Toll/interleukin-1 receptor homology (TIR) domain)%2C IPR000767 (Disease resistance protein)%2C IPR027417 (P-loop containing nucleoside triphosphate hydrolase)%3B GO:0000166 (nucleotide binding)%2C GO:0005515 (protein binding)%2C GO:0006952 (defense response)%2C GO:0007165 (signal transduction)%2C GO:0017111 (nucleoside-triphosph…
Down	Araip.M95I6	Disease resistance protein (TIR-NBS-LRR class) family%3B IPR000157 (Toll/interleukin-1 receptor homology (TIR) domain)%2C IPR000767 (Disease resistance protein)%2C IPR027417 (P-loop containing nucleoside triphosphate hydrolase)%3B GO:0000166 (nucleotide binding)%2C GO:0005515 (protein binding)%2C GO:0006952 (defense response)%2C GO:0007165 (signal transduction)%2C GO:0017111 (nucleoside-triphosph…
Down	Aradu.6Y4L0	Disease resistance protein (TIR-NBS-LRR class) family%3B IPR000157 (Toll/interleukin-1 receptor homology (TIR) domain)%2C IPR000767 (Disease resistance protein)%2C IPR027417 (P-loop containing nucleoside triphosphate hydrolase)%3B GO:0005515 (protein binding)%2C GO:0006952 (defense response)%2C GO:0007165 (signal transduction)%2C GO:0043531 (ADP binding)
Down	Aradu.A35HY	Disease resistance protein (TIR-NBS-LRR class) family%3B IPR000157 (Toll/interleukin-1 receptor homology (TIR) domain)%2C IPR000767 (Disease resistance protein)%2C IPR027417 (P-loop containing nucleoside triphosphate hydrolase)%3B GO:0005515 (protein binding)%2C GO:0006952 (defense response)%2C GO:0007165 (signal transduction)%2C GO:0043531 (ADP binding)
Down	Aradu.GV74G	Disease resistance protein (TIR-NBS-LRR class) family%3B IPR000157 (Toll/interleukin-1 receptor homology (TIR) domain)%2C IPR000767 (Disease resistance protein)%2C IPR027417 (P-loop containing nucleoside triphosphate hydrolase)%3B GO:0005515 (protein binding)%2C GO:0006952 (defense response)%2C GO:0007165 (signal transduction)%2C GO:0043531 (ADP binding)
Down	Aradu.E0ZB7	Disease resistance protein (TIR-NBS-LRR class) family%3B IPR000157 (Toll/interleukin-1 receptor homology (TIR) domain)%2C IPR000767 (Disease resistance protein)%2C IPR027417 (P-loop containing nucleoside triphosphate hydrolase)%3B GO:0005515 (protein binding)%2C GO:0006952 (defense response)%2C GO:0007165 (signal transduction)%2C GO:0043531 (ADP binding)
Down	Aradu.N8TLT	Disease resistance protein (TIR-NBS-LRR class) family%3B IPR000157 (Toll/interleukin-1 receptor homology (TIR) domain)%3B GO:0005515 (protein binding)%2C GO:0007165 (signal transduction)
Down	Araip.VXS50	Disease resistance protein (TIR-NBS-LRR class) family%3B IPR000767 (Disease resistance protein)%2C IPR027417 (P-loop containing nucleoside triphosphate hydrolase)%3B GO:0006952 (defense response)%2C GO:0043531 (ADP binding)
Down	Aradu.C18AL	Disease resistance protein (TIR-NBS-LRR class) family%3B IPR000767 (Disease resistance protein)%2C IPR027417 (P-loop containing nucleoside triphosphate hydrolase)%3B GO:0006952 (defense response)%2C GO:0043531 (ADP binding)
Down	Aradu.62QCX	Disease resistance protein (TIR-NBS-LRR class) family%3B IPR000767 (Disease resistance protein)%2C IPR027417 (P-loop containing nucleoside triphosphate hydrolase)%3B GO:0006952 (defense response)%2C GO:0043531 (ADP binding)
Down	Araip.5F36T	disease resistance protein (TIR-NBS-LRR class)%2C putative
Down	Aradu.NZP2S	disease resistance protein (TIR-NBS-LRR class)%2C putative
Down	Aradu.CM87L	disease resistance protein (TIR-NBS-LRR class)%2C putative%3B IPR000157 (Toll/interleukin-1 receptor homology (TIR) domain)%2C IPR000767 (Disease resistance protein)%2C IPR001611 (Leucine-rich repeat)%2C IPR003591 (Leucine-rich repeat%2C typical subtype)%2C IPR027417 (P-loop containing nucleoside triphosphate hydrolase)%3B GO:0005515 (protein binding)%2C GO:0006952 (defense response)%2C GO:000716…
Down	Aradu.N09A5	disease resistance protein (TIR-NBS-LRR class)%2C putative%3B IPR000157 (Toll/interleukin-1 receptor homology (TIR) domain)%2C IPR000767 (Disease resistance protein)%2C IPR001611 (Leucine-rich repeat)%2C IPR008217 (Domain of unknown function DUF125%2C transmembrane)%2C IPR025875 (Leucine rich repeat 4)%2C IPR027417 (P-loop containing nucleoside triphosphate hydrolase)%3B GO:0005515 (protein bindi…
Down	Araip.H2P98	disease resistance protein (TIR-NBS-LRR class)%2C putative%3B IPR000157 (Toll/interleukin-1 receptor homology (TIR) domain)%2C IPR000767 (Disease resistance protein)%2C IPR027417 (P-loop containing nucleoside triphosphate hydrolase)%3B GO:0005515 (protein binding)%2C GO:0006952 (defense response)%2C GO:0007165 (signal transduction)%2C GO:0043531 (ADP binding)
Down	Aradu.0QE03	disease resistance protein (TIR-NBS-LRR class)%2C putative%3B IPR000157 (Toll/interleukin-1 receptor homology (TIR) domain)%2C IPR000767 (Disease resistance protein)%2C IPR027417 (P-loop containing nucleoside triphosphate hydrolase)%3B GO:0005515 (protein binding)%2C GO:0006952 (defense response)%2C GO:0007165 (signal transduction)%2C GO:0043531 (ADP binding)
Down	Araip.NEH1G	disease resistance protein (TIR-NBS-LRR class)%2C putative%3B IPR000157 (Toll/interleukin-1 receptor homology (TIR) domain)%2C IPR002182 (NB-ARC)%2C IPR027417 (P-loop containing nucleoside triphosphate hydrolase)%3B GO:0005515 (protein binding)%2C GO:0007165 (signal transduction)%2C GO:0043531 (ADP binding)
Down	Aradu.2C5J4	disease resistance protein (TIR-NBS-LRR class)%2C putative%3B IPR000767 (Disease resistance protein)%2C IPR001611 (Leucine-rich repeat)%2C IPR027417 (P-loop containing nucleoside triphosphate hydrolase)%3B GO:0005515 (protein binding)%2C GO:0006952 (defense response)%2C GO:0043531 (ADP binding)
Down	Aradu.S2WWI	Disease resistance protein (TIR-NBS-LRR class)%3B IPR000157 (Toll/interleukin-1 receptor homology (TIR) domain)%2C IPR000767 (Disease resistance protein)%2C IPR027417 (P-loop containing nucleoside triphosphate hydrolase)%3B GO:0005515 (protein binding)%2C GO:0006952 (defense response)%2C GO:0007165 (signal transduction)%2C GO:0043531 (ADP binding)
Up	Aradu.2U645	disease resistance protein%3B IPR000767 (Disease resistance protein)%2C IPR027417 (P-loop containing nucleoside triphosphate hydrolase)%3B GO:0006952 (defense response)%2C GO:0043531 (ADP binding)
Up	Aradu.G737E	disease resistance protein%3B IPR000767 (Disease resistance protein)%2C IPR027417 (P-loop containing nucleoside triphosphate hydrolase)%3B GO:0006952 (defense response)%2C GO:0043531 (ADP binding)
Down	Aradu.XXK8G	disease resistance protein%3B IPR000767 (Disease resistance protein)%2C IPR027417 (P-loop containing nucleoside triphosphate hydrolase)%3B GO:0006952 (defense response)%2C GO:0043531 (ADP binding)
Up	Aradu.PYS2I	disease resistance protein%3B IPR000767 (Disease resistance protein)%2C IPR027417 (P-loop containing nucleoside triphosphate hydrolase)%3B GO:0006952 (defense response)%2C GO:0043531 (ADP binding)
Down	Aradu.QV720	Disease resistance-responsive (dirigent-like protein) family protein%3B IPR004265 (Plant disease resistance response protein)
Up	Aradu.7673S	Disease resistance-responsive (dirigent-like protein) family protein%3B IPR004265 (Plant disease resistance response protein)
Up	Aradu.YN1Y7	Disease resistance-responsive (dirigent-like protein) family protein%3B IPR004265 (Plant disease resistance response protein)
Down	Aradu.0X3DX	disease-resistance response protein%3B IPR000916 (Bet v I domain)%2C IPR023393 (START-like domain)%2C IPR024949 (Bet v I type allergen)%3B GO:0006952 (defense response)%2C GO:0009607 (response to biotic stimulus)
Down	Araip.RDM9N	disease-resistance response protein%3B IPR000916 (Bet v I domain)%2C IPR023393 (START-like domain)%2C IPR024949 (Bet v I type allergen)%3B GO:0006952 (defense response)%2C GO:0009607 (response to biotic stimulus)
Down	Araip.H1IIW	disease-resistance response protein%3B IPR000916 (Bet v I domain)%2C IPR023393 (START-like domain)%2C IPR024949 (Bet v I type allergen)%3B GO:0006952 (defense response)%2C GO:0009607 (response to biotic stimulus)
Down	Aradu.RN9XS	disease-resistance response protein%3B IPR000916 (Bet v I domain)%2C IPR023393 (START-like domain)%2C IPR024949 (Bet v I type allergen)%3B GO:0006952 (defense response)%2C GO:0009607 (response to biotic stimulus)
Down	Aradu.VR9HJ	disease-resistance response protein%3B IPR000916 (Bet v I domain)%2C IPR023393 (START-like domain)%2C IPR024949 (Bet v I type allergen)%3B GO:0006952 (defense response)%2C GO:0009607 (response to biotic stimulus)
Up	Aradu.HG8JX	D-lactate dehydrogenase (cytochrome)%3B IPR016164 (FAD-linked oxidase-like%2C C-terminal)%2C IPR016166 (FAD-binding%2C type 2)%3B GO:0003824 (catalytic activity)%2C GO:0008762 (UDP-N-acetylmuramate dehydrogenase activity)%2C GO:0016491 (oxidoreductase activity)%2C GO:0050660 (flavin adenine dinucleotide binding)%2C GO:0055114 (oxidation-reduction process)
Down	Aradu.NFN5F	DNA (cytosine-5)-methyltransferase DRM2-like isoform X1 [Glycine max]%3B IPR001525 (C-5 cytosine methyltransferase)%3B GO:0003677 (DNA binding)%2C GO:0006306 (DNA methylation)%2C GO:0008168 (methyltransferase activity)
Down	Aradu.GN4F8	DNA (cytosine-5-)-methyltransferase family protein%3B IPR001525 (C-5 cytosine methyltransferase)%3B GO:0003677 (DNA binding)%2C GO:0003682 (chromatin binding)%2C GO:0003886 (DNA (cytosine-5-)-methyltransferase activity)%2C GO:0005634 (nucleus)%2C GO:0006306 (DNA methylation)%2C GO:0008168 (methyltransferase activity)%2C GO:0090116 (C-5 methylation of cytosine)
Down	Aradu.XT75Q	DNA photolyase family protein%3B IPR002124 (Cytochrome c oxidase%2C subunit Vb)%2C IPR005101 (DNA photolyase%2C FAD-binding/Cryptochrome%2C C-terminal)%2C IPR006050 (DNA photolyase%2C N-terminal)%3B GO:0003913 (DNA photolyase activity)%2C GO:0004129 (cytochrome-c oxidase activity)%2C GO:0005740 (mitochondrial envelope)%2C GO:0006281 (DNA repair)
Down	Aradu.U14K2	DNA polymerase alpha 2%3B IPR016722 (DNA polymerase alpha%2C subunit B)%3B GO:0003677 (DNA binding)%2C GO:0003887 (DNA-directed DNA polymerase activity)%2C GO:0006260 (DNA replication)
Down	Aradu.DK1IZ	DNA polymerase I-like protein%3B IPR002421 (5'-3' exonuclease%2C N-terminal)%3B GO:0003677 (DNA binding)%2C GO:0003824 (catalytic activity)
Down	Aradu.W9JMR	DNA topoisomerase (ATP-hydrolyzing)s%3B ATP binding%3B DNA binding%3B IPR001241 (DNA topoisomerase%2C type IIA)%2C IPR024946 (Arginine repressor C-terminal-like domain)%3B GO:0003677 (DNA binding)%2C GO:0003918 (DNA topoisomerase type II (ATP-hydrolyzing) activity)%2C GO:0005524 (ATP binding)%2C GO:0006259 (DNA metabolic process)%2C GO:0006265 (DNA topological change)
Up	Aradu.PSF4U	DNA-binding protein n%3D1 Tax%3DCatharanthus roseus RepID%3DA1DR77_CATRO%3B IPR003106 (Leucine zipper%2C homeobox-associated)%2C IPR009057 (Homeodomain-like)%3B GO:0000976 (transcription regulatory region sequence-specific DNA binding)%2C GO:0003677 (DNA binding)%2C GO:0003700 (sequence-specific DNA binding transcription factor activity)%2C GO:0005634 (nucleus)%2C GO:0043565 (sequence-specific DN…
Up	Aradu.G4UPX	DNA-binding protein n%3D1 Tax%3DCatharanthus roseus RepID%3DA1DR78_CATRO%3B IPR003106 (Leucine zipper%2C homeobox-associated)%2C IPR009057 (Homeodomain-like)%3B GO:0000976 (transcription regulatory region sequence-specific DNA binding)%2C GO:0003677 (DNA binding)%2C GO:0003700 (sequence-specific DNA binding transcription factor activity)%2C GO:0005634 (nucleus)%2C GO:0043565 (sequence-specific DN…
Up	Araip.T80U6	DNA-binding protein n%3D1 Tax%3DDaucus carota RepID%3DQ43425_DAUCA%3B IPR009057 (Homeodomain-like)%3B GO:0003677 (DNA binding)%2C GO:0003700 (sequence-specific DNA binding transcription factor activity)%2C GO:0043565 (sequence-specific DNA binding)
Down	Aradu.R7CC6	DNA-binding protein n%3D1 Tax%3DDaucus carota RepID%3DQ43429_DAUCA%3B IPR003106 (Leucine zipper%2C homeobox-associated)%2C IPR009057 (Homeodomain-like)%3B GO:0000976 (transcription regulatory region sequence-specific DNA binding)%2C GO:0003677 (DNA binding)%2C GO:0003700 (sequence-specific DNA binding transcription factor activity)%2C GO:0005634 (nucleus)%2C GO:0043565 (sequence-specific DNA bind…
Down	Araip.X3D7D	DNA-binding protein n%3D1 Tax%3DDaucus carota RepID%3DQ43429_DAUCA%3B IPR003106 (Leucine zipper%2C homeobox-associated)%2C IPR009057 (Homeodomain-like)%3B GO:0000976 (transcription regulatory region sequence-specific DNA binding)%2C GO:0003677 (DNA binding)%2C GO:0003700 (sequence-specific DNA binding transcription factor activity)%2C GO:0005634 (nucleus)%2C GO:0043565 (sequence-specific DNA bind…
Up	Aradu.0YU5H	DNA-binding protein SMUBP-2%3B IPR014001 (Helicase%2C superfamily 1/2%2C ATP-binding domain)%2C IPR027417 (P-loop containing nucleoside triphosphate hydrolase)%3B GO:0000166 (nucleotide binding)%2C GO:0017111 (nucleoside-triphosphatase activity)
Up	Aradu.E5TXD	DNA-binding protein%2C putative%2C expressed n%3D1 Tax%3DOryza sativa subsp. japonica RepID%3DQ10R58_ORYSJ%3B IPR009057 (Homeodomain-like)%3B GO:0003677 (DNA binding)%2C GO:0003700 (sequence-specific DNA binding transcription factor activity)%2C GO:0043565 (sequence-specific DNA binding)
Down	Aradu.JRM51	DNA-directed RNA polymerase I protein%3B IPR006592 (RNA polymerase%2C N-terminal)%2C IPR007066 (RNA polymerase Rpb1%2C domain 3)%2C IPR007080 (RNA polymerase Rpb1%2C domain 1)%3B GO:0003677 (DNA binding)%2C GO:0003899 (DNA-directed RNA polymerase activity)
Up	Aradu.289SI	DNA-directed RNA polymerase%3B IPR015801 (Copper amine oxidase%2C N2/N3-terminal)%2C IPR021602 (Protein of unknown function DUF3223)%3B GO:0005507 (copper ion binding)%2C GO:0009308 (amine metabolic process)%2C GO:0048038 (quinone binding)
Up	Aradu.1R8GF	DNA-directed RNA polymerases II%2C IV and V subunit 12 [Glycine max]%3B IPR006591 (RNA polymerase archaeal subunit P/eukaryotic subunit RPABC4)%3B GO:0003677 (DNA binding)%2C GO:0003899 (DNA-directed RNA polymerase activity)
Down	Araip.68YDH	DnaJ heat shock amine-terminal domain protein%3B IPR011990 (Tetratricopeptide-like helical)%3B GO:0005515 (protein binding)
Up	Aradu.CC15G	DNAJ heat shock N-terminal domain-containing protein
Up	Aradu.3XQ1H	DNAJ homologue 2%3B IPR001623 (DnaJ domain)%2C IPR002939 (Chaperone DnaJ%2C C-terminal)%3B GO:0006457 (protein folding)%2C GO:0051082 (unfolded protein binding)
Up	Araip.XKG1J	DNAJ homologue 3%3B IPR001623 (DnaJ domain)%2C IPR002939 (Chaperone DnaJ%2C C-terminal)%3B GO:0006457 (protein folding)%2C GO:0051082 (unfolded protein binding)
Up	Aradu.B0BG6	DNAJ homologue 3%3B IPR001623 (DnaJ domain)%2C IPR002939 (Chaperone DnaJ%2C C-terminal)%3B GO:0006457 (protein folding)%2C GO:0051082 (unfolded protein binding)
Up	Araip.E30BB	DnaJ/Hsp40 cysteine-rich domain superfamily protein isoform 1 n%3D2 Tax%3DTheobroma cacao RepID%3DUPI00042B30FC%3B IPR001305 (Heat shock protein DnaJ%2C cysteine-rich domain)%3B GO:0031072 (heat shock protein binding)%2C GO:0051082 (unfolded protein binding)
Up	Aradu.FL5LP	DnaJ/Hsp40 cysteine-rich domain superfamily protein%3B IPR001305 (Heat shock protein DnaJ%2C cysteine-rich domain)%3B GO:0031072 (heat shock protein binding)%2C GO:0051082 (unfolded protein binding)
Up	Aradu.84VG0	DnaJ/Hsp40 cysteine-rich domain superfamily protein%3B IPR001305 (Heat shock protein DnaJ%2C cysteine-rich domain)%3B GO:0031072 (heat shock protein binding)%2C GO:0051082 (unfolded protein binding)
Up	Araip.5K3MR	DNAJ-like 20%3B IPR001623 (DnaJ domain)
Up	Aradu.MS406	DOF zinc finger protein 1%3B IPR003851 (Zinc finger%2C Dof-type)%3B GO:0003677 (DNA binding)
Up	Aradu.32ZUX	dof zinc finger protein DOF5.1 [Glycine max]%3B IPR003851 (Zinc finger%2C Dof-type)%3B GO:0003677 (DNA binding)
Up	Aradu.7E2JG	dof zinc finger protein DOF5.6 [Glycine max]%3B IPR003851 (Zinc finger%2C Dof-type)%3B GO:0003677 (DNA binding)
Up	Araip.Z142E	dof zinc finger protein DOF5.6-like [Glycine max]%3B IPR003851 (Zinc finger%2C Dof-type)%3B GO:0003677 (DNA binding)
Down	Aradu.MRJ6D	dof zinc finger protein DOF5.6-like [Glycine max]%3B IPR003851 (Zinc finger%2C Dof-type)%3B GO:0003677 (DNA binding)
Down	Aradu.4E354	dolichyl-diphosphooligosaccharide--protein glycosyltransferase subunit 1A-like [Glycine max]%3B IPR007676 (Ribophorin I)%3B GO:0004579 (dolichyl-diphosphooligosaccharide-protein glycotransferase activity)%2C GO:0005783 (endoplasmic reticulum)%2C GO:0006486 (protein glycosylation)%2C GO:0016021 (integral component of membrane)
Down	Aradu.L3N74	dolichyl-diphosphooligosaccharide--protein glycosyltransferase subunit 2-like [Glycine max]%3B IPR008814 (Dolichyl-diphosphooligosaccharide--protein glycosyltransferase subunit Swp1)%3B GO:0006487 (protein N-linked glycosylation)%2C GO:0008250 (oligosaccharyltransferase complex)%2C GO:0016021 (integral component of membrane)
Up	Aradu.PY313	Dormancy/auxin associated family protein%3B IPR008406 (Dormancyauxin associated)
Up	Aradu.NR4MV	D-ribulose-5-phosphate-3-epimerase%3B IPR000056 (Ribulose-phosphate 3-epimerase-like)%2C IPR013785 (Aldolase-type TIM barrel)%3B GO:0003824 (catalytic activity)%2C GO:0005975 (carbohydrate metabolic process)%2C GO:0008152 (metabolic process)
Up	Araip.GTW9X	D-ribulose-5-phosphate-3-epimerase%3B IPR000056 (Ribulose-phosphate 3-epimerase-like)%2C IPR013785 (Aldolase-type TIM barrel)%3B GO:0003824 (catalytic activity)%2C GO:0005975 (carbohydrate metabolic process)%2C GO:0008152 (metabolic process)
Down	Aradu.LFL4V	dual specificity protein kinase shkD-like [Glycine max]
Down	Araip.BN3HZ	DUF1997 family protein%3B IPR018971 (Protein of unknown function DUF1997)
Up	Aradu.ND5YL	DUF2358 family protein%3B IPR018790 (Protein of unknown function DUF2358)
Up	Araip.JD30L	DUF247 domain protein%3B IPR004158 (Protein of unknown function DUF247%2C plant)
Down	Aradu.IQ5U2	DUF3128 family protein%3B IPR021475 (Protein of unknown function DUF3128)
Down	Aradu.MZ9P5	DUF674 family protein%3B IPR007750 (Protein of unknown function DUF674)
Down	Aradu.4XV1B	DUF936 family protein%3B IPR010341 (Protein of unknown function DUF936%2C plant)
Down	Aradu.6YX1J	Dynamin related protein 5A%3B IPR001401 (Dynamin%2C GTPase domain)%2C IPR022812 (Dynamin superfamily)%2C IPR027417 (P-loop containing nucleoside triphosphate hydrolase)%3B GO:0003924 (GTPase activity)%2C GO:0005525 (GTP binding)
Down	Aradu.ND5H2	dynein light chain%2C cytoplasmic-like [Glycine max]%3B IPR001372 (Dynein light chain%2C type 1/2)%2C IPR006461 (Uncharacterised protein family Cys-rich)%3B GO:0005875 (microtubule associated complex)%2C GO:0007017 (microtubule-based process)
Up	Araip.Y2JZW	E3 ubiquitin-protein ligase At1g12760-like [Glycine max]
Down	Aradu.545KH	E3 ubiquitin-protein ligase BOI-like isoform X1 [Glycine max]%3B IPR013083 (Zinc finger%2C RING/FYVE/PHD-type)
Down	Araip.UM5IV	E3 ubiquitin-protein ligase BOI-like isoform X3 [Glycine max]%3B IPR001841 (Zinc finger%2C RING-type)%3B GO:0005515 (protein binding)%2C GO:0008270 (zinc ion binding)
Up	Aradu.WKJ3N	E3 ubiquitin-protein ligase COP1-like [Glycine max]%3B IPR011009 (Protein kinase-like domain)%2C IPR015943 (WD40/YVTN repeat-like-containing domain)%2C IPR020472 (G-protein beta WD-40 repeat)%3B GO:0004672 (protein kinase activity)%2C GO:0005515 (protein binding)%2C GO:0005524 (ATP binding)%2C GO:0006468 (protein phosphorylation)
Down	Aradu.SGU0V	E3 ubiquitin-protein ligase RGLG2-like isoform X2 [Glycine max]%3B IPR000008 (C2 domain)%2C IPR002035 (von Willebrand factor%2C type A)%2C IPR010734 (Copine)%3B GO:0005515 (protein binding)
Down	Aradu.T1Q4B	E3 ubiquitin-protein ligase RING1-like [Glycine max]%3B IPR010543 (Domain of unknown function DUF1117)%2C IPR013083 (Zinc finger%2C RING/FYVE/PHD-type)%3B GO:0005515 (protein binding)%2C GO:0008270 (zinc ion binding)
Up	Aradu.C23TA	E3 ubiquitin-protein ligase RMA1H1-like isoform X3 [Glycine max]%3B IPR013083 (Zinc finger%2C RING/FYVE/PHD-type)%3B GO:0005515 (protein binding)%2C GO:0008270 (zinc ion binding)
Up	Aradu.942ZP	early light-induced-like protein%3B IPR022796 (Chlorophyll A-B binding protein)%2C IPR023329 (Chlorophyll a/b binding protein domain)
Up	Aradu.M3LQ3	early nodulin-like protein 9%3B IPR008972 (Cupredoxin)%3B GO:0005507 (copper ion binding)%2C GO:0009055 (electron carrier activity)
Up	Aradu.LK8D7	ELMO domain-containing protein A isoform X1 [Glycine max]%3B IPR006816 (Engulfment/cell motility%2C ELMO)%3B GO:0005856 (cytoskeleton)%2C GO:0006909 (phagocytosis)
Up	Aradu.SZ6Y0	endo-1%2C3%3B 1%2C4-beta-D-glucanase-like [Glycine max]%3B IPR002925 (Dienelactone hydrolase)%3B GO:0016787 (hydrolase activity)
Down	Aradu.61W2G	endoglucanase [Glycine max]%3B IPR001701 (Glycoside hydrolase%2C family 9)%2C IPR008928 (Six-hairpin glycosidase-like)%3B GO:0003824 (catalytic activity)%2C GO:0005975 (carbohydrate metabolic process)
Down	Aradu.9G7GM	endoglucanase 10-like [Glycine max]%3B IPR001701 (Glycoside hydrolase%2C family 9)%2C IPR008928 (Six-hairpin glycosidase-like)%3B GO:0003824 (catalytic activity)%2C GO:0005975 (carbohydrate metabolic process)
Down	Aradu.DD097	endoglucanase 8-like [Glycine max]%3B IPR001701 (Glycoside hydrolase%2C family 9)%2C IPR008928 (Six-hairpin glycosidase-like)%3B GO:0003824 (catalytic activity)%2C GO:0005975 (carbohydrate metabolic process)
Down	Aradu.BHB13	endonuclease/exonuclease/phosphatase family protein%3B IPR005135 (Endonuclease/exonuclease/phosphatase)
Down	Aradu.E26HT	epoxide hydrolase%3B IPR000639 (Epoxide hydrolase-like)%3B GO:0003824 (catalytic activity)
Down	Aradu.D8HQK	epoxide hydrolase%3B IPR000639 (Epoxide hydrolase-like)%3B GO:0003824 (catalytic activity)
Up	Aradu.P3VBU	epoxide hydrolase-like protein%3B IPR000639 (Epoxide hydrolase-like)%3B GO:0003824 (catalytic activity)
Up	Aradu.XI1B2	epoxide hydrolase-like protein%3B IPR000639 (Epoxide hydrolase-like)%3B GO:0003824 (catalytic activity)
Down	Aradu.LLG7Z	equilibrative nucleoside transporter 6%3B IPR002259 (Equilibrative nucleoside transporter)%2C IPR016196 (Major facilitator superfamily domain%2C general substrate transporter)%3B GO:0005337 (nucleoside transmembrane transporter activity)%2C GO:0006810 (transport)%2C GO:0016021 (integral component of membrane)
Down	Aradu.JW08T	equilibrative nucleoside transporter 6%3B IPR002259 (Equilibrative nucleoside transporter)%3B GO:0005337 (nucleoside transmembrane transporter activity)%2C GO:0006810 (transport)%2C GO:0016021 (integral component of membrane)
Down	Aradu.B8V9A	ERD (early-responsive to dehydration stress) family protein%3B IPR003864 (Domain of unknown function DUF221)%3B GO:0016020 (membrane)
Down	Aradu.SYY8Y	Erythronate-4-phosphate dehydrogenase family protein
Up	Aradu.W9SQK	Esterase/lipase/thioesterase family protein%3B IPR007130 (Diacylglycerol acyltransferase)
Up	Araip.UWZ3E	Esterase/lipase/thioesterase family protein%3B IPR007130 (Diacylglycerol acyltransferase)
Up	Aradu.W7HND	Esterase/lipase/thioesterase family protein%3B IPR007130 (Diacylglycerol acyltransferase)
Down	Aradu.U6LTE	ethylene-responsive nuclear protein / ethylene-regulated nuclear protein (ERT2)
Down	Aradu.LD7BF	ethylene-responsive transcription factor 1A-like [Glycine max]%3B IPR016177 (DNA-binding domain)%3B GO:0003677 (DNA binding)%2C GO:0003700 (sequence-specific DNA binding transcription factor activity)
Down	Araip.QQN2T	ethylene-responsive transcription factor 1B%3B IPR016177 (DNA-binding domain)%3B GO:0003677 (DNA binding)%2C GO:0003700 (sequence-specific DNA binding transcription factor activity)
Down	Aradu.D4PZ8	ethylene-responsive transcription factor 3-like [Glycine max]%3B IPR016177 (DNA-binding domain)%3B GO:0003677 (DNA binding)%2C GO:0003700 (sequence-specific DNA binding transcription factor activity)
Down	Aradu.E2TII	ethylene-responsive transcription factor 4-like [Glycine max]%3B IPR016177 (DNA-binding domain)%3B GO:0003677 (DNA binding)%2C GO:0003700 (sequence-specific DNA binding transcription factor activity)
Down	Araip.QDN6F	ethylene-responsive transcription factor RAP2-4 [Glycine max]%3B IPR001471 (AP2/ERF domain)%3B GO:0003700 (sequence-specific DNA binding transcription factor activity)
Up	Araip.CJ51X	ethylene-responsive transcription factor RAP2-7-like isoform X3 [Glycine max]
Up	Aradu.Z922D	Eukaryotic aspartyl protease family protein%3B IPR001461 (Aspartic peptidase)%2C IPR021109 (Aspartic peptidase domain)%3B GO:0004190 (aspartic-type endopeptidase activity)%2C GO:0006508 (proteolysis)
Up	Araip.02EM5	Eukaryotic aspartyl protease family protein%3B IPR001461 (Aspartic peptidase)%2C IPR021109 (Aspartic peptidase domain)%3B GO:0004190 (aspartic-type endopeptidase activity)%2C GO:0006508 (proteolysis)
Up	Aradu.A723B	Eukaryotic aspartyl protease family protein%3B IPR001461 (Aspartic peptidase)%2C IPR021109 (Aspartic peptidase domain)%3B GO:0004190 (aspartic-type endopeptidase activity)%2C GO:0006508 (proteolysis)
Up	Aradu.P5HL2	Eukaryotic aspartyl protease family protein%3B IPR001461 (Aspartic peptidase)%2C IPR021109 (Aspartic peptidase domain)%3B GO:0004190 (aspartic-type endopeptidase activity)%2C GO:0006508 (proteolysis)
Down	Aradu.IWK4F	Eukaryotic aspartyl protease family protein%3B IPR001461 (Aspartic peptidase)%2C IPR021109 (Aspartic peptidase domain)%3B GO:0004190 (aspartic-type endopeptidase activity)%2C GO:0006508 (proteolysis)
Down	Aradu.UB13R	Eukaryotic aspartyl protease family protein%3B IPR001461 (Aspartic peptidase)%2C IPR021109 (Aspartic peptidase domain)%3B GO:0004190 (aspartic-type endopeptidase activity)%2C GO:0006508 (proteolysis)
Down	Aradu.X7X7E	Eukaryotic aspartyl protease family protein%3B IPR001461 (Aspartic peptidase)%2C IPR021109 (Aspartic peptidase domain)%3B GO:0004190 (aspartic-type endopeptidase activity)%2C GO:0006508 (proteolysis)
Down	Aradu.E79Y1	Eukaryotic aspartyl protease family protein%3B IPR001461 (Aspartic peptidase)%2C IPR021109 (Aspartic peptidase domain)%3B GO:0004190 (aspartic-type endopeptidase activity)%2C GO:0006508 (proteolysis)
Down	Aradu.U7IGL	Eukaryotic aspartyl protease family protein%3B IPR001461 (Aspartic peptidase)%2C IPR021109 (Aspartic peptidase domain)%3B GO:0004190 (aspartic-type endopeptidase activity)%2C GO:0006508 (proteolysis)
Down	Aradu.50TKD	Eukaryotic aspartyl protease family protein%3B IPR001461 (Aspartic peptidase)%2C IPR021109 (Aspartic peptidase domain)%3B GO:0004190 (aspartic-type endopeptidase activity)%2C GO:0006508 (proteolysis)
Up	Araip.FD7MI	eukaryotic translation initiation factor 5-like [Glycine max]%3B IPR002735 (Translation initiation factor IF2/IF5)%2C IPR016024 (Armadillo-type fold)%3B GO:0003743 (translation initiation factor activity)%2C GO:0005488 (binding)%2C GO:0005515 (protein binding)%2C GO:0006413 (translational initiation)
Down	Araip.GF8PG	exocyst subunit exo70 family protein B1%3B IPR004140 (Exocyst complex protein Exo70)%2C IPR016159 (Cullin repeat-like-containing domain)%3B GO:0000145 (exocyst)%2C GO:0006887 (exocytosis)
Down	Aradu.I2DKG	exocyst subunit exo70 family protein B1%3B IPR004140 (Exocyst complex protein Exo70)%2C IPR016159 (Cullin repeat-like-containing domain)%3B GO:0000145 (exocyst)%2C GO:0006887 (exocytosis)
Down	Araip.YQV6W	exocyst subunit exo70 family protein B2%3B IPR004140 (Exocyst complex protein Exo70)%2C IPR016159 (Cullin repeat-like-containing domain)%3B GO:0000145 (exocyst)%2C GO:0006887 (exocytosis)
Down	Aradu.65Y8V	Exostosin family protein%3B IPR004263 (Exostosin-like)
Down	Araip.R7ESZ	expansin-like A2%3B IPR007118 (Expansin/Lol pI)%3B GO:0005576 (extracellular region)%2C GO:0019953 (sexual reproduction)
Up	Aradu.C9WJ5	expansin-like B1-like [Glycine max]%3B IPR007117 (Expansin%2C cellulose-binding-like domain)
Up	Aradu.Q8YW5	Expressed protein n%3D4 Tax%3DOryza sativa RepID%3DQ10FB7_ORYSJ
Down	Aradu.PP8B2	extra-large guanine nucleotide-binding protein 1-like [Glycine max]%3B IPR001019 (Guanine nucleotide binding protein (G-protein)%2C alpha subunit)%3B GO:0003924 (GTPase activity)%2C GO:0004871 (signal transducer activity)%2C GO:0007165 (signal transduction)%2C GO:0007186 (G-protein coupled receptor signaling pathway)%2C GO:0019001 (guanyl nucleotide binding)%2C GO:0031683 (G-protein beta/gamma-su…
Up	Aradu.D7CPW	FAD dependent oxidoreductase n%3D1 Tax%3Dcyanobacterium PCC 7702 RepID%3DUPI00036A198D
Down	Araip.GR2J9	FAD-binding Berberine family protein%3B IPR012951 (Berberine/berberine-like)%2C IPR016166 (FAD-binding%2C type 2)%3B GO:0003824 (catalytic activity)%2C GO:0008762 (UDP-N-acetylmuramate dehydrogenase activity)%2C GO:0016491 (oxidoreductase activity)%2C GO:0050660 (flavin adenine dinucleotide binding)%2C GO:0055114 (oxidation-reduction process)
Up	Aradu.DU4SG	FAD-binding Berberine family protein%3B IPR012951 (Berberine/berberine-like)%2C IPR016166 (FAD-binding%2C type 2)%3B GO:0003824 (catalytic activity)%2C GO:0008762 (UDP-N-acetylmuramate dehydrogenase activity)%2C GO:0016491 (oxidoreductase activity)%2C GO:0050660 (flavin adenine dinucleotide binding)%2C GO:0055114 (oxidation-reduction process)
Up	Aradu.4X1GI	FAD-binding Berberine family protein%3B IPR012951 (Berberine/berberine-like)%2C IPR016166 (FAD-binding%2C type 2)%3B GO:0003824 (catalytic activity)%2C GO:0008762 (UDP-N-acetylmuramate dehydrogenase activity)%2C GO:0016491 (oxidoreductase activity)%2C GO:0050660 (flavin adenine dinucleotide binding)%2C GO:0055114 (oxidation-reduction process)
Up	Aradu.MT2IW	FAD-binding Berberine family protein%3B IPR012951 (Berberine/berberine-like)%2C IPR016166 (FAD-binding%2C type 2)%3B GO:0003824 (catalytic activity)%2C GO:0008762 (UDP-N-acetylmuramate dehydrogenase activity)%2C GO:0016491 (oxidoreductase activity)%2C GO:0050660 (flavin adenine dinucleotide binding)%2C GO:0055114 (oxidation-reduction process)
Down	Araip.H60UK	FAR1 DNA-binding domain protein%3B IPR004330 (FAR1 DNA binding domain)
Up	Aradu.S738B	farnesyl diphosphate synthase 1%3B IPR000092 (Polyprenyl synthetase)%3B GO:0008299 (isoprenoid biosynthetic process)
Down	Aradu.J3TVA	fasciclin domain protein%3B IPR000782 (FAS1 domain)
Up	Aradu.RI35R	FASCICLIN-like arabinogalactan protein 16 precursor%3B IPR000782 (FAS1 domain)
Down	Aradu.ME00T	FASCICLIN-like arabinogalactan protein 16 precursor%3B IPR000782 (FAS1 domain)
Down	Aradu.RW69W	fatty acid amide hydrolase-like [Glycine max]%3B IPR000120 (Amidase)%2C IPR023631 (Amidase signature domain)
Down	Aradu.5N10F	fatty acid desaturase 8%3B IPR005804 (Fatty acid desaturase%2C type 1)%2C IPR021863 (Protein of unknown function DUF3474)%3B GO:0006629 (lipid metabolic process)%2C GO:0055114 (oxidation-reduction process)
Down	Araip.84LR8	fatty acid desaturase 8%3B IPR005804 (Fatty acid desaturase%2C type 1)%2C IPR021863 (Protein of unknown function DUF3474)%3B GO:0006629 (lipid metabolic process)%2C GO:0055114 (oxidation-reduction process)
Down	Aradu.8GP5U	fatty acid desaturase 8%3B IPR005804 (Fatty acid desaturase%2C type 1)%2C IPR021863 (Protein of unknown function DUF3474)%3B GO:0006629 (lipid metabolic process)%2C GO:0055114 (oxidation-reduction process)
Up	Araip.2D5S2	Fatty acid hydroxylase superfamily%3B IPR006694 (Fatty acid hydroxylase)%2C IPR016040 (NAD(P)-binding domain)%2C IPR021940 (Uncharacterised domain Wax2%2C C-terminal)%3B GO:0005506 (iron ion binding)%2C GO:0006633 (fatty acid biosynthetic process)%2C GO:0016491 (oxidoreductase activity)%2C GO:0055114 (oxidation-reduction process)
Up	Aradu.Y31QN	Fatty acid hydroxylase superfamily%3B IPR006694 (Fatty acid hydroxylase)%3B GO:0005506 (iron ion binding)%2C GO:0006633 (fatty acid biosynthetic process)%2C GO:0016491 (oxidoreductase activity)%2C GO:0055114 (oxidation-reduction process)
Down	Aradu.PR2BP	Fatty acid/sphingolipid desaturase%3B IPR012171 (Fatty acid/sphingolipid desaturase)%3B GO:0005506 (iron ion binding)%2C GO:0006629 (lipid metabolic process)%2C GO:0006633 (fatty acid biosynthetic process)%2C GO:0020037 (heme binding)%2C GO:0055114 (oxidation-reduction process)
Down	Aradu.H9CAJ	Fatty acid/sphingolipid desaturase%3B IPR012171 (Fatty acid/sphingolipid desaturase)%3B GO:0005506 (iron ion binding)%2C GO:0006629 (lipid metabolic process)%2C GO:0006633 (fatty acid biosynthetic process)%2C GO:0020037 (heme binding)%2C GO:0055114 (oxidation-reduction process)
Down	Aradu.902BX	F-box family protein%3B IPR001810 (F-box domain)%3B GO:0005515 (protein binding)
Up	Aradu.6T9HL	F-box family protein%3B IPR001810 (F-box domain)%3B GO:0005515 (protein binding)
Down	Araip.222D3	F-box protein At4g02760-like isoform X1 [Glycine max]
Up	Aradu.D9TW9	F-box protein PP2-A13%3B IPR001810 (F-box domain)%2C IPR025886 (Phloem protein 2-like)%3B GO:0005515 (protein binding)
Down	Araip.QQ6TH	F-box/LRR-repeat protein 17-like [Glycine max]
Up	Aradu.1KH61	F-box/RNI-like superfamily protein%3B IPR001229 (Mannose-binding lectin)%2C IPR001810 (F-box domain)%3B GO:0005515 (protein binding)
Up	Aradu.K4111	F-box/RNI-like superfamily protein%3B IPR001810 (F-box domain)%2C IPR006566 (FBD domain)%3B GO:0005515 (protein binding)
Up	Araip.C2X2S	F-box/RNI-like superfamily protein%3B IPR001810 (F-box domain)%2C IPR006566 (FBD domain)%3B GO:0005515 (protein binding)
Down	Aradu.XK5XR	F-box/WD repeat-containing protein 7-like [Glycine max]%3B IPR001810 (F-box domain)%2C IPR015943 (WD40/YVTN repeat-like-containing domain)%2C IPR020472 (G-protein beta WD-40 repeat)%3B GO:0005515 (protein binding)
Up	Aradu.9SJ9X	ferredoxin 1%3B IPR010241 (Ferredoxin [2Fe-2S]%2C plant)%2C IPR012675 (Beta-grasp domain)%3B GO:0009055 (electron carrier activity)%2C GO:0022900 (electron transport chain)%2C GO:0051536 (iron-sulfur cluster binding)
Up	Araip.IIT1C	ferredoxin-NADP(+)-oxidoreductase 1
Up	Aradu.HQT4J	ferric reduction oxidase 2%3B IPR001834 (NADH:cytochrome b5 reductase (CBR))%2C IPR013121 (Ferric reductase%2C NAD binding)%2C IPR017938 (Riboflavin synthase-like beta-barrel)%3B GO:0016491 (oxidoreductase activity)%2C GO:0055114 (oxidation-reduction process)
Up	Aradu.CR2ZJ	ferrochelatase 2%3B IPR001015 (Ferrochelatase)%3B GO:0004325 (ferrochelatase activity)%2C GO:0006783 (heme biosynthetic process)
Down	Aradu.BV4I8	filament-like plant protein-like isoform X3 [Glycine max]%3B IPR008587 (Filament-like plant protein)
Down	Araip.0A2JK	FkbM family methyltransferase%3B IPR006342 (Methyltransferase FkbM)
Down	Aradu.3YL1K	FKBP-like peptidyl-prolyl cis-trans isomerase family protein%3B IPR001179 (Peptidyl-prolyl cis-trans isomerase%2C FKBP-type%2C domain)%2C IPR011990 (Tetratricopeptide-like helical)%2C IPR023566 (Peptidyl-prolyl cis-trans isomerase%2C FKBP-type)%3B GO:0005515 (protein binding)%2C GO:0006457 (protein folding)
Up	Araip.5W0HJ	FKBP-like peptidyl-prolyl cis-trans isomerase family protein%3B IPR001179 (Peptidyl-prolyl cis-trans isomerase%2C FKBP-type%2C domain)%2C IPR023114 (Elongated TPR repeat-containing domain)%2C IPR023566 (Peptidyl-prolyl cis-trans isomerase%2C FKBP-type)%3B GO:0006457 (protein folding)
Up	Aradu.DBX63	FKBP-like peptidyl-prolyl cis-trans isomerase family protein%3B IPR001179 (Peptidyl-prolyl cis-trans isomerase%2C FKBP-type%2C domain)%2C IPR023566 (Peptidyl-prolyl cis-trans isomerase%2C FKBP-type)%3B GO:0006457 (protein folding)
Up	Aradu.D66VA	FKBP-like peptidyl-prolyl cis-trans isomerase family protein%3B IPR001179 (Peptidyl-prolyl cis-trans isomerase%2C FKBP-type%2C domain)%2C IPR023566 (Peptidyl-prolyl cis-trans isomerase%2C FKBP-type)%3B GO:0006457 (protein folding)
Up	Aradu.PA4MY	FKBP-like peptidyl-prolyl cis-trans isomerase family protein%3B IPR001179 (Peptidyl-prolyl cis-trans isomerase%2C FKBP-type%2C domain)%2C IPR023566 (Peptidyl-prolyl cis-trans isomerase%2C FKBP-type)%3B GO:0006457 (protein folding)
Up	Aradu.Q5M0R	flavanone 3-hydroxylase [Glycine max]%3B IPR005123 (Oxoglutarate/iron-dependent dioxygenase)%2C IPR026992 (Non-haem dioxygenase N-terminal domain)%2C IPR027443 (Isopenicillin N synthase-like)%3B GO:0016491 (oxidoreductase activity)%2C GO:0055114 (oxidation-reduction process)
Up	Aradu.R2M0E	Flavin containing amine oxidoreductase family
Up	Aradu.GQ9NY	Flavin-binding monooxygenase family protein%3B IPR013027 (FAD-dependent pyridine nucleotide-disulphide oxidoreductase)%2C IPR020946 (Flavin monooxygenase-like)%3B GO:0016491 (oxidoreductase activity)%2C GO:0050660 (flavin adenine dinucleotide binding)%2C GO:0050661 (NADP binding)%2C GO:0055114 (oxidation-reduction process)
Up	Aradu.H1RA6	Flavin-binding monooxygenase family protein%3B IPR020946 (Flavin monooxygenase-like)%3B GO:0050660 (flavin adenine dinucleotide binding)%2C GO:0050661 (NADP binding)%2C GO:0055114 (oxidation-reduction process)
Down	Aradu.QPP4F	Flavin-containing monooxygenase family protein%3B IPR013027 (FAD-dependent pyridine nucleotide-disulphide oxidoreductase)%3B GO:0016491 (oxidoreductase activity)%2C GO:0055114 (oxidation-reduction process)
Down	Aradu.5R20L	flocculation protein FLO11 isoform X3 [Glycine max]
Down	Aradu.02CQ3	flocculation protein FLO11 isoform X3 [Glycine max]
Up	Araip.JD0XB	flocculation protein FLO11-like isoform X3 [Glycine max]%3B IPR004252 (Probable transposase%2C Ptta/En/Spm%2C plant)
Down	Aradu.821KE	folate/biopterin transporter%3B IPR004324 (Biopterin transport-related protein BT1)%2C IPR016196 (Major facilitator superfamily domain%2C general substrate transporter)
Up	Aradu.64LXI	Folic acid and derivative biosynthetic process isoform 1 n%3D1 Tax%3DTheobroma cacao RepID%3DUPI00042B7F04%3B IPR005645 (Serine hydrolase FSH)
Up	Aradu.P63YC	fructokinase-like 2%3B IPR011611 (Carbohydrate kinase PfkB)
Up	Aradu.791RE	fructose-1%2C6-bisphosphatase%3B IPR000146 (Fructose-1%2C6-bisphosphatase class 1/Sedoheputulose-1%2C7-bisphosphatase)%3B GO:0005975 (carbohydrate metabolic process)%2C GO:0042578 (phosphoric ester hydrolase activity)
Up	Aradu.N7F34	fructose-1%2C6-bisphosphatase%3B IPR000146 (Fructose-1%2C6-bisphosphatase class 1/Sedoheputulose-1%2C7-bisphosphatase)%3B GO:0005975 (carbohydrate metabolic process)%2C GO:0042578 (phosphoric ester hydrolase activity)
Up	Aradu.8I79H	fructose-1%2C6-bisphosphatase%3B IPR000146 (Fructose-1%2C6-bisphosphatase class 1/Sedoheputulose-1%2C7-bisphosphatase)%3B GO:0005975 (carbohydrate metabolic process)%2C GO:0042578 (phosphoric ester hydrolase activity)
Up	Aradu.Z5F9U	fructose-bisphosphate aldolase 1%3B IPR000741 (Fructose-bisphosphate aldolase%2C class-I)%2C IPR013785 (Aldolase-type TIM barrel)%3B GO:0003824 (catalytic activity)%2C GO:0004332 (fructose-bisphosphate aldolase activity)%2C GO:0006096 (glycolysis)
Down	Aradu.4QE7C	fructose-bisphosphate aldolase 2%3B IPR000741 (Fructose-bisphosphate aldolase%2C class-I)%2C IPR013785 (Aldolase-type TIM barrel)%3B GO:0003824 (catalytic activity)%2C GO:0004332 (fructose-bisphosphate aldolase activity)%2C GO:0006096 (glycolysis)
Down	Araip.D7597	fructose-bisphosphate aldolase 2%3B IPR000741 (Fructose-bisphosphate aldolase%2C class-I)%2C IPR013785 (Aldolase-type TIM barrel)%3B GO:0003824 (catalytic activity)%2C GO:0004332 (fructose-bisphosphate aldolase activity)%2C GO:0006096 (glycolysis)
Up	Aradu.N8WG9	fructose-bisphosphate aldolase 2%3B IPR000741 (Fructose-bisphosphate aldolase%2C class-I)%2C IPR013785 (Aldolase-type TIM barrel)%3B GO:0003824 (catalytic activity)%2C GO:0004332 (fructose-bisphosphate aldolase activity)%2C GO:0006096 (glycolysis)
Up	Aradu.Z0EIQ	galactinol synthase 1%3B IPR002495 (Glycosyl transferase%2C family 8)
Up	Aradu.9K3NU	galactinol synthase 1%3B IPR002495 (Glycosyl transferase%2C family 8)
Up	Aradu.KX3FZ	Galactose oxidase/kelch repeat superfamily protein%3B IPR001810 (F-box domain)%2C IPR015916 (Galactose oxidase%2C beta-propeller)%3B GO:0005515 (protein binding)
Down	Aradu.42MPW	Galactosyltransferase family protein%3B IPR002659 (Glycosyl transferase%2C family 31)%2C IPR008985 (Concanavalin A-like lectin/glucanases superfamily)%2C IPR013320 (Concanavalin A-like lectin/glucanase%2C subgroup)%3B GO:0006486 (protein glycosylation)%2C GO:0008378 (galactosyltransferase activity)%2C GO:0016020 (membrane)%2C GO:0030246 (carbohydrate binding)
Down	Araip.VG3MP	gamete-expressed 3
Down	Aradu.NCP7U	gamma-irradiation and mitomycin c induced 1
Up	Araip.ISI3L	gamma-tocopherol methyltransferase%3B IPR013216 (Methyltransferase type 11)%3B GO:0008152 (metabolic process)%2C GO:0008168 (methyltransferase activity)
Down	Aradu.S5QF1	GATA transcription factor 11%3B IPR013088 (Zinc finger%2C NHR/GATA-type)%3B GO:0003700 (sequence-specific DNA binding transcription factor activity)%2C GO:0008270 (zinc ion binding)%2C GO:0043565 (sequence-specific DNA binding)
Down	Aradu.YNN2E	GATA transcription factor 12%3B IPR016679 (Transcription factor%2C GATA%2C plant)%3B GO:0003677 (DNA binding)%2C GO:0003700 (sequence-specific DNA binding transcription factor activity)%2C GO:0005634 (nucleus)%2C GO:0008270 (zinc ion binding)%2C GO:0043565 (sequence-specific DNA binding)
Down	Aradu.210JQ	GATA transcription factor 3%3B IPR016679 (Transcription factor%2C GATA%2C plant)%3B GO:0003677 (DNA binding)%2C GO:0003700 (sequence-specific DNA binding transcription factor activity)%2C GO:0005634 (nucleus)%2C GO:0008270 (zinc ion binding)%2C GO:0043565 (sequence-specific DNA binding)
Down	Aradu.N52ZC	GDSL esterase/lipase [Glycine max]%3B IPR001087 (Lipase%2C GDSL)%3B GO:0006629 (lipid metabolic process)%2C GO:0016787 (hydrolase activity)
Up	Aradu.031YC	GDSL esterase/lipase plant-like protein%3B IPR002921 (Lipase%2C class 3)%3B GO:0004806 (triglyceride lipase activity)%2C GO:0006629 (lipid metabolic process)
Down	Aradu.F05QN	GDSL-like Lipase/Acylhydrolase superfamily protein%3B IPR001087 (Lipase%2C GDSL)%3B GO:0006629 (lipid metabolic process)%2C GO:0016787 (hydrolase activity)
Down	Aradu.MWZ9M	GDSL-like Lipase/Acylhydrolase superfamily protein%3B IPR001087 (Lipase%2C GDSL)%3B GO:0006629 (lipid metabolic process)%2C GO:0016787 (hydrolase activity)
Up	Araip.FX9RS	GDSL-like Lipase/Acylhydrolase superfamily protein%3B IPR001087 (Lipase%2C GDSL)%3B GO:0006629 (lipid metabolic process)%2C GO:0016787 (hydrolase activity)
Down	Araip.IE6IQ	GDSL-like Lipase/Acylhydrolase superfamily protein%3B IPR001087 (Lipase%2C GDSL)%3B GO:0006629 (lipid metabolic process)%2C GO:0016787 (hydrolase activity)
Down	Aradu.TMP0B	GDSL-like Lipase/Acylhydrolase superfamily protein%3B IPR001087 (Lipase%2C GDSL)%3B GO:0006629 (lipid metabolic process)%2C GO:0016787 (hydrolase activity)
Down	Aradu.X828R	GDSL-like Lipase/Acylhydrolase superfamily protein%3B IPR001087 (Lipase%2C GDSL)%3B GO:0006629 (lipid metabolic process)%2C GO:0016787 (hydrolase activity)
Down	Aradu.D6ILC	GDSL-like Lipase/Acylhydrolase superfamily protein%3B IPR001087 (Lipase%2C GDSL)%3B GO:0006629 (lipid metabolic process)%2C GO:0016787 (hydrolase activity)
Down	Aradu.ZX8WQ	GDSL-like Lipase/Acylhydrolase superfamily protein%3B IPR001087 (Lipase%2C GDSL)%3B GO:0006629 (lipid metabolic process)%2C GO:0016787 (hydrolase activity)
Up	Aradu.M3XI9	GDSL-like Lipase/Acylhydrolase superfamily protein%3B IPR001087 (Lipase%2C GDSL)%3B GO:0006629 (lipid metabolic process)%2C GO:0016787 (hydrolase activity)
Up	Aradu.E7RLV	GDSL-like Lipase/Acylhydrolase superfamily protein%3B IPR001087 (Lipase%2C GDSL)%3B GO:0006629 (lipid metabolic process)%2C GO:0016787 (hydrolase activity)
Down	Aradu.X8SXD	GDSL-like Lipase/Acylhydrolase superfamily protein%3B IPR001087 (Lipase%2C GDSL)%3B GO:0006629 (lipid metabolic process)%2C GO:0016787 (hydrolase activity)
Up	Aradu.XC1GR	GDSL-like Lipase/Acylhydrolase superfamily protein%3B IPR001087 (Lipase%2C GDSL)%3B GO:0006629 (lipid metabolic process)%2C GO:0016787 (hydrolase activity)
Down	Aradu.J0PHD	GDSL-like Lipase/Acylhydrolase superfamily protein%3B IPR001087 (Lipase%2C GDSL)%3B GO:0006629 (lipid metabolic process)%2C GO:0016787 (hydrolase activity)
Up	Aradu.68QSX	GDSL-like Lipase/Acylhydrolase superfamily protein%3B IPR001087 (Lipase%2C GDSL)%3B GO:0006629 (lipid metabolic process)%2C GO:0016787 (hydrolase activity)
Down	Aradu.DT5AJ	GDSL-like lipase/acylhydrolase%3B IPR001087 (Lipase%2C GDSL)%3B GO:0006629 (lipid metabolic process)%2C GO:0016787 (hydrolase activity)
Up	Aradu.JM3PB	GDSL-like lipase/acylhydrolase%3B IPR001087 (Lipase%2C GDSL)%3B GO:0006629 (lipid metabolic process)%2C GO:0016787 (hydrolase activity)
Up	Aradu.C1UGC	general transcription factor group E6%3B IPR001487 (Bromodomain)%3B GO:0005515 (protein binding)
Down	Aradu.59T83	general transcription factor group E6%3B IPR001487 (Bromodomain)%3B GO:0005515 (protein binding)
Up	Aradu.646B6	geranylgeranyl diphosphate reductase%2C chloroplastic [Glycine max]%3B IPR003042 (Aromatic-ring hydroxylase-like)%2C IPR011777 (Geranylgeranyl reductase family)%2C IPR016040 (NAD(P)-binding domain)%2C IPR023753 (Pyridine nucleotide-disulphide oxidoreductase%2C FAD/NAD(P)-binding domain)%3B GO:0008152 (metabolic process)%2C GO:0015979 (photosynthesis)%2C GO:0015995 (chlorophyll biosynthetic proces…
Up	Aradu.7K822	geranylgeranyl diphosphate reductase%2C chloroplastic [Glycine max]%3B IPR003042 (Aromatic-ring hydroxylase-like)%2C IPR011777 (Geranylgeranyl reductase family)%2C IPR016040 (NAD(P)-binding domain)%2C IPR023753 (Pyridine nucleotide-disulphide oxidoreductase%2C FAD/NAD(P)-binding domain)%3B GO:0008152 (metabolic process)%2C GO:0015979 (photosynthesis)%2C GO:0015995 (chlorophyll biosynthetic proces…
Up	Aradu.BH653	geranylgeranyl pyrophosphate synthase 1%3B IPR017446 (Polyprenyl synthetase-related)%3B GO:0008299 (isoprenoid biosynthetic process)
Down	Araip.F3HB9	germin-like protein 10%3B IPR001929 (Germin)%3B GO:0030145 (manganese ion binding)%2C GO:0045735 (nutrient reservoir activity)
Up	Aradu.GMU6R	gibberellin 20 oxidase 1-like [Glycine max]%3B IPR002283 (Isopenicillin N synthase)%2C IPR026992 (Non-haem dioxygenase N-terminal domain)%2C IPR027443 (Isopenicillin N synthase-like)%3B GO:0005506 (iron ion binding)%2C GO:0016491 (oxidoreductase activity)%2C GO:0055114 (oxidation-reduction process)
Up	Aradu.XZ0HK	gibberellin 20 oxidase 2-like [Glycine max]%3B IPR002283 (Isopenicillin N synthase)%2C IPR026992 (Non-haem dioxygenase N-terminal domain)%2C IPR027443 (Isopenicillin N synthase-like)%3B GO:0005506 (iron ion binding)%2C GO:0016491 (oxidoreductase activity)%2C GO:0055114 (oxidation-reduction process)
Down	Aradu.M0E3H	Gibberellin-regulated family protein%3B IPR003854 (Gibberellin regulated protein)
Down	Aradu.ALT43	glucan endo-1%2C3-beta-glucosidase [Glycine max]%3B IPR000490 (Glycoside hydrolase%2C family 17)%2C IPR012946 (X8)%2C IPR017853 (Glycoside hydrolase%2C superfamily)%3B GO:0005975 (carbohydrate metabolic process)
Down	Aradu.VK692	glucan endo-1%2C3-beta-glucosidase 12-like [Glycine max]%3B IPR012946 (X8)
Down	Aradu.QEW6R	glucan endo-1%2C3-beta-glucosidase 2-like [Glycine max]%3B IPR000490 (Glycoside hydrolase%2C family 17)%2C IPR012946 (X8)%2C IPR017853 (Glycoside hydrolase%2C superfamily)%3B GO:0005975 (carbohydrate metabolic process)
Down	Aradu.0LB5P	glucan endo-1%2C3-beta-glucosidase 3 [Glycine max]%3B IPR000490 (Glycoside hydrolase%2C family 17)%2C IPR012946 (X8)%2C IPR017853 (Glycoside hydrolase%2C superfamily)%3B GO:0005975 (carbohydrate metabolic process)
Down	Aradu.TH0MN	glucan endo-1%2C3-beta-glucosidase 4-like [Glycine max]%3B IPR000490 (Glycoside hydrolase%2C family 17)%2C IPR012946 (X8)%2C IPR017853 (Glycoside hydrolase%2C superfamily)%3B GO:0005975 (carbohydrate metabolic process)
Down	Aradu.50MTX	glucan endo-1%2C3-beta-glucosidase 8-like [Glycine max]%3B IPR000490 (Glycoside hydrolase%2C family 17)%2C IPR012946 (X8)%2C IPR017853 (Glycoside hydrolase%2C superfamily)%3B GO:0005975 (carbohydrate metabolic process)
Down	Araip.3S2JK	glucan endo-1%2C3-beta-glucosidase 8-like [Glycine max]%3B IPR000490 (Glycoside hydrolase%2C family 17)%2C IPR012946 (X8)%2C IPR017853 (Glycoside hydrolase%2C superfamily)%3B GO:0005975 (carbohydrate metabolic process)
Down	Aradu.8Q6IV	glucan endo-1%2C3-beta-glucosidase-like [Glycine max]%3B IPR000490 (Glycoside hydrolase%2C family 17)%2C IPR017853 (Glycoside hydrolase%2C superfamily)%3B GO:0005975 (carbohydrate metabolic process)
Up	Aradu.K1Z44	glucomannan 4-beta-mannosyltransferase 9-like [Glycine max]
Up	Aradu.N9XQ2	glucomannan 4-beta-mannosyltransferase 9-like [Glycine max]
Up	Aradu.F8ZRN	Glucose-1-phosphate adenylyltransferase family protein%3B IPR011831 (Glucose-1-phosphate adenylyltransferase)%3B GO:0005978 (glycogen biosynthetic process)%2C GO:0008878 (glucose-1-phosphate adenylyltransferase activity)%2C GO:0009058 (biosynthetic process)%2C GO:0016779 (nucleotidyltransferase activity)
Down	Aradu.90MFE	glucose-6-phosphate dehydrogenase 2%3B IPR001282 (Glucose-6-phosphate dehydrogenase)%3B GO:0004345 (glucose-6-phosphate dehydrogenase activity)%2C GO:0006006 (glucose metabolic process)%2C GO:0050661 (NADP binding)%2C GO:0055114 (oxidation-reduction process)
Down	Aradu.0GW00	Glucose-6-phosphate/phosphate translocator-related%3B IPR004696 (Triose phosphate/phosphoenolpyruvate translocator)%2C IPR004853 (Triose-phosphate transporter domain)%3B GO:0005215 (transporter activity)%2C GO:0006810 (transport)%2C GO:0016020 (membrane)%2C GO:0016021 (integral component of membrane)
Up	Aradu.68JAU	glutamate receptor 3.4%3B IPR001638 (Extracellular solute-binding protein%2C family 3)%2C IPR002455 (GPCR%2C family 3%2C gamma-aminobutyric acid receptor%2C type B)%2C IPR017103 (Ionotropic glutamate receptor%2C plant)%2C IPR028082 (Periplasmic binding protein-like I)%3B GO:0004965 (G-protein coupled GABA receptor activity)%2C GO:0004970 (ionotropic glutamate receptor activity)%2C GO:0005215 (tra…
Up	Aradu.TN0QL	glutamate-1-semialdehyde 2%2C1-aminomutase 2%3B IPR005814 (Aminotransferase class-III)%2C IPR015424 (Pyridoxal phosphate-dependent transferase)%3B GO:0003824 (catalytic activity)%2C GO:0008483 (transaminase activity)%2C GO:0030170 (pyridoxal phosphate binding)%2C GO:0033014 (tetrapyrrole biosynthetic process)
Down	Aradu.Q4KBE	glutamine synthetase 1%3B 4%3B IPR014746 (Glutamine synthetase/guanido kinase%2C catalytic domain)%3B GO:0003824 (catalytic activity)%2C GO:0004356 (glutamate-ammonia ligase activity)%2C GO:0006807 (nitrogen compound metabolic process)
Down	Araip.74N1T	glutamine synthetase 1.3%3B IPR008147 (Glutamine synthetase%2C beta-Grasp)%2C IPR014746 (Glutamine synthetase/guanido kinase%2C catalytic domain)%3B GO:0003824 (catalytic activity)%2C GO:0004356 (glutamate-ammonia ligase activity)%2C GO:0006542 (glutamine biosynthetic process)%2C GO:0006807 (nitrogen compound metabolic process)
Down	Araip.SZ8NT	glutamine synthetase 1.3%3B IPR008147 (Glutamine synthetase%2C beta-Grasp)%3B GO:0004356 (glutamate-ammonia ligase activity)%2C GO:0006542 (glutamine biosynthetic process)%2C GO:0006807 (nitrogen compound metabolic process)
Up	Aradu.G6IK8	glutamine synthetase 2%3B IPR003339 (ABC/ECF transporter%2C transmembrane component)%2C IPR008147 (Glutamine synthetase%2C beta-Grasp)%2C IPR014746 (Glutamine synthetase/guanido kinase%2C catalytic domain)%3B GO:0003824 (catalytic activity)%2C GO:0004356 (glutamate-ammonia ligase activity)%2C GO:0006542 (glutamine biosynthetic process)%2C GO:0006807 (nitrogen compound metabolic process)
Up	Aradu.Z9Z80	Glutamyl-tRNA reductase family protein%3B IPR000343 (Tetrapyrrole biosynthesis%2C glutamyl-tRNA reductase)%2C IPR016040 (NAD(P)-binding domain)%3B GO:0008883 (glutamyl-tRNA reductase activity)%2C GO:0033014 (tetrapyrrole biosynthetic process)%2C GO:0050661 (NADP binding)%2C GO:0055114 (oxidation-reduction process)
Up	Araip.816XH	Glutamyl-tRNA reductase family protein%3B IPR000343 (Tetrapyrrole biosynthesis%2C glutamyl-tRNA reductase)%2C IPR016040 (NAD(P)-binding domain)%3B GO:0008883 (glutamyl-tRNA reductase activity)%2C GO:0033014 (tetrapyrrole biosynthetic process)%2C GO:0050661 (NADP binding)%2C GO:0055114 (oxidation-reduction process)
Up	Aradu.4U4LS	glutathione peroxidase 4%3B IPR000889 (Glutathione peroxidase)%2C IPR012336 (Thioredoxin-like fold)%3B GO:0004602 (glutathione peroxidase activity)%2C GO:0006979 (response to oxidative stress)%2C GO:0055114 (oxidation-reduction process)
Down	Aradu.6NU8A	glutathione reductase%3B IPR006324 (Glutathione-disulphide reductase)%2C IPR013027 (FAD-dependent pyridine nucleotide-disulphide oxidoreductase)%2C IPR016156 (FAD/NAD-linked reductase%2C dimerisation domain)%2C IPR023753 (Pyridine nucleotide-disulphide oxidoreductase%2C FAD/NAD(P)-binding domain)%3B GO:0004362 (glutathione-disulfide reductase activity)%2C GO:0006749 (glutathione metabolic process…
Down	Aradu.I2JEZ	glutathione S-transferase 6%3B IPR010987 (Glutathione S-transferase%2C C-terminal-like)%2C IPR012336 (Thioredoxin-like fold)%3B GO:0005515 (protein binding)
Up	Aradu.NQ0MH	glutathione S-transferase F4%3B IPR010987 (Glutathione S-transferase%2C C-terminal-like)%2C IPR012336 (Thioredoxin-like fold)%3B GO:0005515 (protein binding)
Up	Aradu.73PA3	Glutathione S-transferase family protein%3B IPR010987 (Glutathione S-transferase%2C C-terminal-like)%2C IPR012336 (Thioredoxin-like fold)%3B GO:0005515 (protein binding)
Up	Aradu.A6W0E	Glutathione S-transferase family protein%3B IPR010987 (Glutathione S-transferase%2C C-terminal-like)%2C IPR012336 (Thioredoxin-like fold)%3B GO:0005515 (protein binding)
Up	Aradu.4QM78	Glutathione S-transferase family protein%3B IPR010987 (Glutathione S-transferase%2C C-terminal-like)%2C IPR012336 (Thioredoxin-like fold)%3B GO:0005515 (protein binding)
Up	Araip.J9Q6I	Glutathione S-transferase family protein%3B IPR010987 (Glutathione S-transferase%2C C-terminal-like)%2C IPR012336 (Thioredoxin-like fold)%3B GO:0005515 (protein binding)
Up	Araip.0BL53	Glutathione S-transferase family protein%3B IPR010987 (Glutathione S-transferase%2C C-terminal-like)%2C IPR012336 (Thioredoxin-like fold)%3B GO:0005515 (protein binding)
Down	Araip.XA49Z	Glutathione S-transferase family protein%3B IPR010987 (Glutathione S-transferase%2C C-terminal-like)%2C IPR012336 (Thioredoxin-like fold)%3B GO:0005515 (protein binding)
Up	Araip.PI28L	Glutathione S-transferase family protein%3B IPR010987 (Glutathione S-transferase%2C C-terminal-like)%2C IPR012336 (Thioredoxin-like fold)%3B GO:0005515 (protein binding)
Up	Aradu.TZ9RJ	Glutathione S-transferase family protein%3B IPR010987 (Glutathione S-transferase%2C C-terminal-like)%2C IPR012336 (Thioredoxin-like fold)%3B GO:0005515 (protein binding)
Down	Aradu.J9XDX	Glutathione S-transferase family protein%3B IPR010987 (Glutathione S-transferase%2C C-terminal-like)%2C IPR012336 (Thioredoxin-like fold)%3B GO:0005515 (protein binding)
Up	Aradu.51L6N	Glutathione S-transferase family protein%3B IPR010987 (Glutathione S-transferase%2C C-terminal-like)%2C IPR012336 (Thioredoxin-like fold)%3B GO:0005515 (protein binding)
Up	Araip.TJ4SX	glyceraldehyde-3-phosphate dehydrogenase C2%3B IPR003823 (Domain of unknown function CP12)%2C IPR020831 (Glyceraldehyde/Erythrose phosphate dehydrogenase family)%3B GO:0055114 (oxidation-reduction process)
Up	Aradu.A3N3V	glyceraldehyde-3-phosphate dehydrogenase C2%3B IPR020831 (Glyceraldehyde/Erythrose phosphate dehydrogenase family)%3B GO:0006006 (glucose metabolic process)%2C GO:0050661 (NADP binding)%2C GO:0051287 (NAD binding)%2C GO:0055114 (oxidation-reduction process)
Down	Aradu.Y017B	glyceraldehyde-3-phosphate dehydrogenase C2%3B IPR020831 (Glyceraldehyde/Erythrose phosphate dehydrogenase family)%3B GO:0006006 (glucose metabolic process)%2C GO:0050661 (NADP binding)%2C GO:0051287 (NAD binding)%2C GO:0055114 (oxidation-reduction process)
Up	Araip.A8435	glyceraldehyde-3-phosphate dehydrogenase C2%3B IPR020831 (Glyceraldehyde/Erythrose phosphate dehydrogenase family)%3B GO:0055114 (oxidation-reduction process)
Up	Araip.US1T3	glyceraldehyde-3-phosphate dehydrogenase C2%3B IPR020831 (Glyceraldehyde/Erythrose phosphate dehydrogenase family)%3B GO:0055114 (oxidation-reduction process)
Up	Araip.A6CT4	glyceraldehyde-3-phosphate dehydrogenase C2%3B IPR020831 (Glyceraldehyde/Erythrose phosphate dehydrogenase family)%3B GO:0055114 (oxidation-reduction process)
Down	Aradu.GH8LH	glycerol-3-phosphate acyltransferase 3-like isoform X1 [Glycine max]%3B IPR002123 (Phospholipid/glycerol acyltransferase)%3B GO:0008152 (metabolic process)
Down	Aradu.00EZV	glycerol-3-phosphate acyltransferase 5%3B IPR002123 (Phospholipid/glycerol acyltransferase)%3B GO:0008152 (metabolic process)
Down	Aradu.X10AK	glycerol-3-phosphate acyltransferase 5%3B IPR002123 (Phospholipid/glycerol acyltransferase)%3B GO:0008152 (metabolic process)
Down	Aradu.31H7A	glycerol-3-phosphate acyltransferase 6%3B IPR002123 (Phospholipid/glycerol acyltransferase)%2C IPR023214 (HAD-like domain)%3B GO:0008152 (metabolic process)
Up	Aradu.41VN6	glycine cleavage system H protein%3B IPR002930 (Glycine cleavage H-protein)%3B GO:0005960 (glycine cleavage complex)%2C GO:0006546 (glycine catabolic process)%2C GO:0019464 (glycine decarboxylation via glycine cleavage system)
Up	Aradu.5CH00	glycine cleavage system H protein%3B IPR002930 (Glycine cleavage H-protein)%3B GO:0005960 (glycine cleavage complex)%2C GO:0006546 (glycine catabolic process)%2C GO:0019464 (glycine decarboxylation via glycine cleavage system)
Down	Aradu.D9ISK	Glycoprotein membrane precursor GPI-anchored
Up	Aradu.F64Z1	Glycosyl hydrolase family protein with chitinase insertion domain%3B IPR017853 (Glycoside hydrolase%2C superfamily)%3B GO:0004568 (chitinase activity)%2C GO:0005975 (carbohydrate metabolic process)%2C GO:0006032 (chitin catabolic process)
Up	Aradu.DD1PY	Glycosyltransferase family 29 (sialyltransferase) family protein%3B IPR001675 (Glycosyl transferase%2C family 29)%3B GO:0006486 (protein glycosylation)%2C GO:0008373 (sialyltransferase activity)%2C GO:0030173 (integral component of Golgi membrane)
Up	Aradu.UY1G3	glyoxylate reductase 2%3B IPR008927 (6-phosphogluconate dehydrogenase%2C C-terminal-like)%2C IPR015815 (Hydroxy monocarboxylic acid anion dehydrogenase%2C HIBADH-type)%2C IPR016040 (NAD(P)-binding domain)%3B GO:0004616 (phosphogluconate dehydrogenase (decarboxylating) activity)%2C GO:0006098 (pentose-phosphate shunt)%2C GO:0016491 (oxidoreductase activity)%2C GO:0050662 (coenzyme binding)%2C GO:0…
Down	Aradu.1S33P	GPI ethanolamine phosphate transferase%3B IPR007070 (GPI ethanolamine phosphate transferase 1)%3B GO:0003824 (catalytic activity)%2C GO:0005789 (endoplasmic reticulum membrane)%2C GO:0006506 (GPI anchor biosynthetic process)%2C GO:0008152 (metabolic process)%2C GO:0008484 (sulfuric ester hydrolase activity)%2C GO:0016740 (transferase activity)
Down	Aradu.6FB0H	GRAM domain-containing protein / ABA-responsive protein-related%3B IPR004182 (GRAM domain)
Up	Aradu.86IQQ	growth-regulating factor 5%3B IPR014977 (WRC)%2C IPR014978 (Glutamine-Leucine-Glutamine%2C QLQ)%3B GO:0005524 (ATP binding)%2C GO:0005634 (nucleus)
Down	Araip.PX6B7	GTP binding Elongation factor Tu family protein%3B IPR000640 (Translation elongation factor EFG%2C V domain)%2C IPR000795 (Elongation factor%2C GTP-binding domain)%2C IPR005225 (Small GTP-binding protein domain)%2C IPR009000 (Translation protein%2C beta-barrel domain)%2C IPR009022 (Elongation factor G%2C III-V domain)%2C IPR020568 (Ribosomal protein S5 domain 2-type fold)%2C IPR027417 (P-loop con…
Up	Aradu.65NZB	GTP binding Elongation factor Tu family protein%3B IPR005225 (Small GTP-binding protein domain)%2C IPR006297 (Elongation factor 4)%2C IPR027417 (P-loop containing nucleoside triphosphate hydrolase)%3B GO:0003924 (GTPase activity)%2C GO:0005525 (GTP binding)
Up	Aradu.GKG4B	GTP binding protein%2C putative n%3D1 Tax%3DRicinus communis RepID%3DB9SK31_RICCO%3B IPR006073 (GTP binding domain)%2C IPR023179 (GTP-binding protein%2C orthogonal bundle domain)%2C IPR027417 (P-loop containing nucleoside triphosphate hydrolase)%3B GO:0005525 (GTP binding)
Down	Aradu.CE5SH	GTP-binding elongation factor Tu family protein%3B IPR000795 (Elongation factor%2C GTP-binding domain)%2C IPR005225 (Small GTP-binding protein domain)%2C IPR009000 (Translation protein%2C beta-barrel domain)%2C IPR009001 (Translation elongation factor EF1A/initiation factor IF2gamma%2C C-terminal)%2C IPR027417 (P-loop containing nucleoside triphosphate hydrolase)%3B GO:0003924 (GTPase activity)%2…
Up	Aradu.4M5JV	GTP-binding elongation factor Tu family protein%3B IPR004541 (Translation elongation factor EFTu/EF1A%2C bacterial/organelle)%2C IPR005225 (Small GTP-binding protein domain)%2C IPR027417 (P-loop containing nucleoside triphosphate hydrolase)%3B GO:0003746 (translation elongation factor activity)%2C GO:0003924 (GTPase activity)%2C GO:0005525 (GTP binding)%2C GO:0005622 (intracellular)%2C GO:0006414…
Down	Aradu.X793I	GTP-binding family protein%3B IPR006073 (GTP binding domain)%2C IPR012971 (Nucleolar GTP-binding protein 2%2C N-terminal domain)%2C IPR023179 (GTP-binding protein%2C orthogonal bundle domain)%2C IPR024929 (Nucleolar GTP-binding protein 2)%2C IPR027417 (P-loop containing nucleoside triphosphate hydrolase)%3B GO:0005525 (GTP binding)%2C GO:0005730 (nucleolus)
Down	Aradu.PFK90	GTP-binding nuclear protein Ran-3 [Glycine max]%3B IPR001806 (Small GTPase superfamily)%2C IPR005225 (Small GTP-binding protein domain)%2C IPR027417 (P-loop containing nucleoside triphosphate hydrolase)%3B GO:0005525 (GTP binding)%2C GO:0005622 (intracellular)%2C GO:0006184 (GTP catabolic process)%2C GO:0007165 (signal transduction)%2C GO:0007264 (small GTPase mediated signal transduction)%2C GO:…
Down	Aradu.YJS53	GTP-binding nuclear protein Ran-3-like [Glycine max]%3B IPR001806 (Small GTPase superfamily)%2C IPR002041 (Ran GTPase)%2C IPR005225 (Small GTP-binding protein domain)%2C IPR027417 (P-loop containing nucleoside triphosphate hydrolase)%3B GO:0003924 (GTPase activity)%2C GO:0005525 (GTP binding)%2C GO:0005622 (intracellular)%2C GO:0006184 (GTP catabolic process)%2C GO:0006886 (intracellular protein …
Down	Aradu.K1UI2	GTP-binding nuclear Ran-like protein%3B IPR001806 (Small GTPase superfamily)%2C IPR002041 (Ran GTPase)%2C IPR005225 (Small GTP-binding protein domain)%2C IPR027417 (P-loop containing nucleoside triphosphate hydrolase)%3B GO:0003924 (GTPase activity)%2C GO:0005525 (GTP binding)%2C GO:0005622 (intracellular)%2C GO:0006184 (GTP catabolic process)%2C GO:0006886 (intracellular protein transport)%2C GO…
Down	Aradu.G5RK1	GTP-binding nuclear Ran-like protein%3B IPR001806 (Small GTPase superfamily)%2C IPR002041 (Ran GTPase)%2C IPR005225 (Small GTP-binding protein domain)%2C IPR027417 (P-loop containing nucleoside triphosphate hydrolase)%3B GO:0003924 (GTPase activity)%2C GO:0005525 (GTP binding)%2C GO:0005622 (intracellular)%2C GO:0006184 (GTP catabolic process)%2C GO:0006886 (intracellular protein transport)%2C GO…
Up	Aradu.EN5VX	GTP-binding nuclear Ran-like protein%3B IPR001806 (Small GTPase superfamily)%2C IPR005225 (Small GTP-binding protein domain)%2C IPR027417 (P-loop containing nucleoside triphosphate hydrolase)%3B GO:0005525 (GTP binding)%2C GO:0005622 (intracellular)%2C GO:0006184 (GTP catabolic process)%2C GO:0007165 (signal transduction)%2C GO:0007264 (small GTPase mediated signal transduction)%2C GO:0015031 (pr…
Up	Aradu.19W8X	GTP-binding protein engA n%3D1 Tax%3DMedicago truncatula RepID%3DG7IED3_MEDTR%3B IPR006073 (GTP binding domain)%2C IPR013785 (Aldolase-type TIM barrel)%2C IPR027417 (P-loop containing nucleoside triphosphate hydrolase)%3B GO:0003824 (catalytic activity)%2C GO:0005525 (GTP binding)
Up	Aradu.ZU0KH	guanine nucleotide-binding protein subunit gamma 3-like isoform X2 [Glycine max]%3B IPR015898 (G-protein gamma-like domain)%3B GO:0004871 (signal transducer activity)%2C GO:0005834 (heterotrimeric G-protein complex)%2C GO:0007186 (G-protein coupled receptor signaling pathway)
Down	Aradu.RD1G7	guanine nucleotide-binding protein-like 3 homolog [Glycine max]%3B IPR007656 (Zein-binding domain)
Up	Aradu.E5VJJ	haloacid dehalogenase-like hydrolase family protein%3B IPR006439 (HAD hydrolase%2C subfamily IA)%2C IPR011042 (Six-bladed beta-propeller%2C TolB-like)%2C IPR012336 (Thioredoxin-like fold)%2C IPR023214 (HAD-like domain)%3B GO:0005515 (protein binding)%2C GO:0008152 (metabolic process)%2C GO:0016787 (hydrolase activity)
Down	Aradu.BT56C	HCP-like superfamily protein with MYND-type zinc finger%3B IPR001810 (F-box domain)%2C IPR002893 (Zinc finger%2C MYND-type)%2C IPR011990 (Tetratricopeptide-like helical)%3B GO:0005515 (protein binding)
Down	Aradu.913QX	heat shock protein 70%3B IPR013126 (Heat shock protein 70 family)
Down	Aradu.M35Z5	heat shock protein 70%3B IPR013126 (Heat shock protein 70 family)
Down	Aradu.66JGA	heat shock protein 70%3B IPR013126 (Heat shock protein 70 family)
Down	Aradu.SB9IZ	heat shock protein 70%3B IPR013126 (Heat shock protein 70 family)
Down	Araip.67A76	HEAT SHOCK PROTEIN 89.1%3B IPR001404 (Heat shock protein Hsp90 family)%3B GO:0005524 (ATP binding)%2C GO:0006457 (protein folding)%2C GO:0006950 (response to stress)%2C GO:0051082 (unfolded protein binding)
Down	Aradu.42GMX	HEAT SHOCK PROTEIN 89.1%3B IPR001404 (Heat shock protein Hsp90 family)%3B GO:0005524 (ATP binding)%2C GO:0006457 (protein folding)%2C GO:0006950 (response to stress)%2C GO:0051082 (unfolded protein binding)
Down	Aradu.YNP6V	heat shock protein 90.1%3B IPR001404 (Heat shock protein Hsp90 family)%3B GO:0005524 (ATP binding)%2C GO:0006457 (protein folding)%2C GO:0006950 (response to stress)%2C GO:0051082 (unfolded protein binding)
Down	Aradu.J8M5W	heat shock protein 91%3B IPR013126 (Heat shock protein 70 family)
Up	Araip.A5C77	heat shock transcription factor A2%3B IPR011991 (Winged helix-turn-helix DNA-binding domain)%2C IPR027725 (Heat shock transcription factor family)%3B GO:0003700 (sequence-specific DNA binding transcription factor activity)%2C GO:0005634 (nucleus)%2C GO:0009408 (response to heat)%2C GO:0043565 (sequence-specific DNA binding)
Up	Aradu.MA5WH	heat shock transcription factor A2%3B IPR011991 (Winged helix-turn-helix DNA-binding domain)%2C IPR027725 (Heat shock transcription factor family)%3B GO:0003700 (sequence-specific DNA binding transcription factor activity)%2C GO:0005634 (nucleus)%2C GO:0009408 (response to heat)%2C GO:0043565 (sequence-specific DNA binding)
Down	Aradu.L9WUK	heat shock transcription factor B4%3B IPR011991 (Winged helix-turn-helix DNA-binding domain)%2C IPR027725 (Heat shock transcription factor family)%3B GO:0003700 (sequence-specific DNA binding transcription factor activity)%2C GO:0005634 (nucleus)%2C GO:0009408 (response to heat)%2C GO:0043565 (sequence-specific DNA binding)
Up	Aradu.8UL0Z	Heavy metal transport/detoxification superfamily protein%3B IPR006121 (Heavy metal-associated domain%2C HMA)%3B GO:0030001 (metal ion transport)%2C GO:0046872 (metal ion binding)
Down	Aradu.M9308	Heavy metal transport/detoxification superfamily protein%3B IPR006121 (Heavy metal-associated domain%2C HMA)%3B GO:0030001 (metal ion transport)%2C GO:0046872 (metal ion binding)
Up	Araip.FP6KG	Heavy metal transport/detoxification superfamily protein%3B IPR006121 (Heavy metal-associated domain%2C HMA)%3B GO:0030001 (metal ion transport)%2C GO:0046872 (metal ion binding)
Down	Araip.YU6EE	Heavy metal transport/detoxification superfamily protein%3B IPR006121 (Heavy metal-associated domain%2C HMA)%3B GO:0030001 (metal ion transport)%2C GO:0046872 (metal ion binding)
Up	Aradu.D46RH	Heavy metal transport/detoxification superfamily protein%3B IPR006121 (Heavy metal-associated domain%2C HMA)%3B GO:0030001 (metal ion transport)%2C GO:0046872 (metal ion binding)
Up	Aradu.V6UC8	Heavy metal transport/detoxification superfamily protein%3B IPR006121 (Heavy metal-associated domain%2C HMA)%3B GO:0030001 (metal ion transport)%2C GO:0046872 (metal ion binding)
Up	Aradu.7JU28	Heavy metal transport/detoxification superfamily protein%3B IPR006121 (Heavy metal-associated domain%2C HMA)%3B GO:0030001 (metal ion transport)%2C GO:0046872 (metal ion binding)
Down	Aradu.NY0ZP	Heavy metal transport/detoxification superfamily protein%3B IPR006121 (Heavy metal-associated domain%2C HMA)%3B GO:0030001 (metal ion transport)%2C GO:0046872 (metal ion binding)
Down	Aradu.10DI4	helicases%3B ATP-dependent helicases%3B nucleic acid binding%3B ATP binding%3B DNA-directed DNA polymerases%3B DNA binding%3B IPR001650 (Helicase%2C C-terminal)%2C IPR004179 (Sec63 domain)%2C IPR014001 (Helicase%2C superfamily 1/2%2C ATP-binding domain)%2C IPR014756 (Immunoglobulin E-set)%2C IPR027417 (P-loop containing nucleoside triphosphate hydrolase)%3B GO:0003676 (nucleic acid binding)%2C GO…
Up	Aradu.A6IZK	high chlorophyll fluorescence phenotype 173%3B IPR008979 (Galactose-binding domain-like)%2C IPR013857 (NADH:ubiquinone oxidoreductase intermediate-associated protein 30)%2C IPR016040 (NAD(P)-binding domain)
Down	Aradu.UK1FU	high mobility group B1%3B IPR009071 (High mobility group box domain)
Down	Aradu.H8PLQ	high mobility group B2%3B IPR009071 (High mobility group box domain)
Down	Aradu.5WK97	Histidine kinase-%2C DNA gyrase B-%2C and HSP90-like ATPase family protein%3B IPR003594 (Histidine kinase-like ATPase%2C ATP-binding domain)%3B GO:0005524 (ATP binding)
Down	Aradu.YMT2S	histidine phosphotransfer protein 6%3B IPR008207 (Signal transduction histidine kinase%2C phosphotransfer (Hpt) domain)%3B GO:0000160 (phosphorelay signal transduction system)%2C GO:0004871 (signal transducer activity)
Down	Aradu.ZMN8D	Histidyl-tRNA synthetase 1%3B IPR001106 (Aromatic amino acid lyase)%2C IPR004516 (Histidine-tRNA ligase/ATP phosphoribosyltransferase regulatory subunit)%2C IPR008948 (L-Aspartase-like)%3B GO:0003824 (catalytic activity)%2C GO:0004821 (histidine-tRNA ligase activity)%2C GO:0005524 (ATP binding)%2C GO:0005737 (cytoplasm)%2C GO:0006427 (histidyl-tRNA aminoacylation)%2C GO:0009058 (biosynthetic proc…
Up	Aradu.3H35A	histone deacetylase 2%3B IPR000286 (Histone deacetylase superfamily)
Down	Araip.KV9IU	histone H2A 11%3B IPR009072 (Histone-fold)%3B GO:0000786 (nucleosome)%2C GO:0003677 (DNA binding)%2C GO:0005634 (nucleus)%2C GO:0006334 (nucleosome assembly)%2C GO:0046982 (protein heterodimerization activity)
Down	Aradu.4C25F	histone-lysine N-methyltransferase SUVR2-like isoform X1 [Glycine max]%3B IPR001214 (SET domain)%2C IPR001965 (Zinc finger%2C PHD-type)%2C IPR003616 (Post-SET domain)%3B GO:0005515 (protein binding)%2C GO:0008270 (zinc ion binding)
Down	Aradu.QIL50	HMG-Y-related protein A-like [Glycine max]%3B IPR011991 (Winged helix-turn-helix DNA-binding domain)%2C IPR020478 (AT hook-like)%3B GO:0000786 (nucleosome)%2C GO:0003677 (DNA binding)%2C GO:0005634 (nucleus)%2C GO:0006334 (nucleosome assembly)
Down	Aradu.Q92MC	homeobox associated leucine zipper protein
Up	Araip.I17XL	homeobox protein knotted-1-like 2-like [Glycine max]%3B IPR005539 (ELK)%2C IPR005541 (KNOX2)%2C IPR009057 (Homeodomain-like)%3B GO:0003677 (DNA binding)%2C GO:0003700 (sequence-specific DNA binding transcription factor activity)%2C GO:0005634 (nucleus)%2C GO:0043565 (sequence-specific DNA binding)
Up	Aradu.YX0HY	homeobox protein knotted-1-like 2-like isoform 1 [Glycine max]%3B IPR005539 (ELK)%2C IPR009057 (Homeodomain-like)%3B GO:0003677 (DNA binding)%2C GO:0003700 (sequence-specific DNA binding transcription factor activity)%2C GO:0005634 (nucleus)%2C GO:0043565 (sequence-specific DNA binding)
Down	Aradu.6LK51	homeobox protein knotted-1-like 3-like isoform X4 [Glycine max]%3B IPR005539 (ELK)%2C IPR005540 (KNOX1)%2C IPR005541 (KNOX2)%2C IPR009057 (Homeodomain-like)%3B GO:0003677 (DNA binding)%2C GO:0003700 (sequence-specific DNA binding transcription factor activity)%2C GO:0005634 (nucleus)%2C GO:0043565 (sequence-specific DNA binding)
Down	Aradu.26U2T	homeobox protein knotted-1-like 3-like isoform X4 [Glycine max]%3B IPR005539 (ELK)%2C IPR005540 (KNOX1)%2C IPR005541 (KNOX2)%2C IPR009057 (Homeodomain-like)%3B GO:0003677 (DNA binding)%2C GO:0003700 (sequence-specific DNA binding transcription factor activity)%2C GO:0005634 (nucleus)%2C GO:0043565 (sequence-specific DNA binding)
Up	Aradu.7T8W5	homeobox-leucine zipper protein ANTHOCYANINLESS 2-like isoform X2 [Glycine max]
Up	Aradu.TC0KD	Homeobox-leucine zipper protein family%3B IPR003106 (Leucine zipper%2C homeobox-associated)%2C IPR009057 (Homeodomain-like)%3B GO:0003677 (DNA binding)%2C GO:0003700 (sequence-specific DNA binding transcription factor activity)%2C GO:0005634 (nucleus)%2C GO:0043565 (sequence-specific DNA binding)
Up	Araip.47LJN	homeobox-leucine zipper protein GLABRA 2-like [Glycine max]%3B IPR002913 (START domain)%2C IPR009057 (Homeodomain-like)%2C IPR023393 (START-like domain)%3B GO:0003677 (DNA binding)%2C GO:0003700 (sequence-specific DNA binding transcription factor activity)%2C GO:0008289 (lipid binding)%2C GO:0043565 (sequence-specific DNA binding)
Down	Aradu.A6XGF	homogentisate phytyltransferase 1%3B IPR000537 (UbiA prenyltransferase family)%3B GO:0004659 (prenyltransferase activity)%2C GO:0016021 (integral component of membrane)
Down	Aradu.4XL1L	homogentisate phytyltransferase 1%3B IPR000537 (UbiA prenyltransferase family)%3B GO:0004659 (prenyltransferase activity)%2C GO:0016021 (integral component of membrane)
Up	Aradu.27WDY	homolog of separase
Down	Aradu.WCX40	HVA22-like protein a-like [Glycine max]%3B IPR004345 (TB2/DP1/HVA22-related protein)%2C IPR007818 (Protein of unknown function DUF702)
Up	Araip.RPB7A	HXXXD-type acyl-transferase family protein%3B IPR003480 (Transferase)%2C IPR023213 (Chloramphenicol acetyltransferase-like domain)
Down	Aradu.QD3GI	HXXXD-type acyl-transferase family protein%3B IPR003480 (Transferase)%2C IPR023213 (Chloramphenicol acetyltransferase-like domain)
Up	Aradu.PVI1D	HXXXD-type acyl-transferase family protein%3B IPR003480 (Transferase)%2C IPR023213 (Chloramphenicol acetyltransferase-like domain)
Down	Aradu.EP6I4	HXXXD-type acyl-transferase family protein%3B IPR003480 (Transferase)%2C IPR023213 (Chloramphenicol acetyltransferase-like domain)
Down	Aradu.V9CJA	HXXXD-type acyl-transferase family protein%3B IPR003480 (Transferase)%2C IPR023213 (Chloramphenicol acetyltransferase-like domain)
Down	Aradu.6D2QA	hyccin-like [Glycine max]
Up	Araip.P4FLV	hydroxymethylglutaryl-CoA synthase-like [Glycine max]%3B IPR016039 (Thiolase-like)%3B GO:0003824 (catalytic activity)%2C GO:0004421 (hydroxymethylglutaryl-CoA synthase activity)%2C GO:0008152 (metabolic process)%2C GO:0008299 (isoprenoid biosynthetic process)
Down	Aradu.L7XWE	hypothetical protein
Down	Aradu.1S9VI	hypothetical protein
Up	Aradu.YFK14	hypothetical protein
Down	Aradu.K63NX	hypothetical protein
Down	Araip.HTN3R	hypothetical protein
Down	Araip.1S9ZE	hypothetical protein
Up	Aradu.002J3	hypothetical protein
Up	Aradu.SG50D	hypothetical protein
Up	Aradu.95YEZ	hypothetical protein
Up	Aradu.J5980	hypothetical protein
Down	Aradu.955HA	hypothetical protein
Up	Aradu.4FV7T	hypothetical protein
Up	Aradu.AV02I	hypothetical protein
Down	Aradu.N57FE	hypothetical protein
Down	Aradu.9M7ZZ	hypothetical protein
Up	Aradu.T3SJB	hypothetical protein%3B IPR019320 (Uncharacterised protein family UPF0402)
Down	Aradu.E0MR2	Hypoxanthine-guanine phosphoribosyltransferase%3B IPR005904 (Hypoxanthine phosphoribosyl transferase)%3B GO:0004422 (hypoxanthine phosphoribosyltransferase activity)%2C GO:0005737 (cytoplasm)%2C GO:0006166 (purine ribonucleoside salvage)%2C GO:0009116 (nucleoside metabolic process)
Down	Aradu.T9H68	IAA-amino acid hydrolase ILR1-like protein%3B IPR002933 (Peptidase M20)%3B GO:0008152 (metabolic process)%2C GO:0016787 (hydrolase activity)
Down	Araip.H37CI	importin-5 isoform X1 [Glycine max]%3B IPR011989 (Armadillo-like helical)%2C IPR016040 (NAD(P)-binding domain)
Up	Aradu.M9FCE	indole-3-acetic acid inducible 14%3B IPR003311 (AUX/IAA protein)%3B GO:0005634 (nucleus)%2C GO:0046983 (protein dimerization activity)
Up	Araip.E1L72	indole-3-acetic acid inducible 14%3B IPR003311 (AUX/IAA protein)%3B GO:0005634 (nucleus)%2C GO:0046983 (protein dimerization activity)
Up	Aradu.JLY8Q	indole-3-acetic acid inducible 9%3B IPR003311 (AUX/IAA protein)%3B GO:0005634 (nucleus)
Up	Aradu.8Q9T1	inosine-uridine preferring nucleoside hydrolase family protein%3B IPR001910 (Inosine/uridine-preferring nucleoside hydrolase domain)%2C IPR023186 (Inosine/uridine-preferring nucleoside hydrolase)
Up	Araip.EQB9T	inositol hexakisphosphate and diphosphoinositol-pentakisphosphate kinase-like isoform X1 [Glycine max]%3B IPR000560 (Histidine phosphatase superfamily%2C clade-2)%3B GO:0003993 (acid phosphatase activity)
Up	Aradu.8ML5D	Inositol monophosphatase family protein%3B IPR000760 (Inositol monophosphatase)%2C IPR013878 (Mo25-like)%3B GO:0005488 (binding)%2C GO:0046854 (phosphatidylinositol phosphorylation)
Up	Araip.7XU1G	Inositol monophosphatase family protein%3B IPR000760 (Inositol monophosphatase)%3B GO:0046854 (phosphatidylinositol phosphorylation)
Down	Aradu.XTT89	inositol-tetrakisphosphate 1-kinase 1-like isoform X1 [Glycine max]%3B IPR008656 (Inositol-tetrakisphosphate 1-kinase)%3B GO:0000287 (magnesium ion binding)%2C GO:0005524 (ATP binding)%2C GO:0005622 (intracellular)%2C GO:0032957 (inositol trisphosphate metabolic process)%2C GO:0046872 (metal ion binding)%2C GO:0047325 (inositol tetrakisphosphate 1-kinase activity)
Down	Aradu.X7WYU	insulin-degrading enzyme%3B IPR011249 (Metalloenzyme%2C LuxS/M16 peptidase-like)%3B GO:0003824 (catalytic activity)%2C GO:0046872 (metal ion binding)
Up	Aradu.H5XDC	Integral membrane component of endoplasmic reticulum-derived COPII-coated vesicles n%3D2 Tax%3DKomagataella pastoris RepID%3DC4R1A2_PICPG%3B IPR009038 (GOLD)%3B GO:0006810 (transport)%2C GO:0016021 (integral component of membrane)
Down	Aradu.RKH9D	Integral membrane HPP family protein%3B IPR007065 (HPP)
Up	Aradu.6E4RZ	integral membrane TerC family protein%3B IPR005496 (Integral membrane protein TerC)%3B GO:0016021 (integral component of membrane)
Down	Aradu.LT5WZ	interactor of constitutive active ROPs 3-like isoform X3 [Glycine max]
Down	Araip.T9749	interactor of constitutive active ROPs 3-like isoform X3 [Glycine max]
Down	Aradu.S0K8G	interactor of constitutive active ROPs 4-like isoform X7 [Glycine max]
Down	Aradu.ZFA07	internal alternative NAD(P)H-ubiquinone oxidoreductase A1%2C mitochondrial-like [Glycine max]%3B IPR013027 (FAD-dependent pyridine nucleotide-disulphide oxidoreductase)%2C IPR023753 (Pyridine nucleotide-disulphide oxidoreductase%2C FAD/NAD(P)-binding domain)%3B GO:0016491 (oxidoreductase activity)%2C GO:0050660 (flavin adenine dinucleotide binding)%2C GO:0055114 (oxidation-reduction process)
Up	Aradu.CQN7Q	isochorismate synthase 2%3B IPR004561 (Isochorismate synthase)%3B GO:0008909 (isochorismate synthase activity)%2C GO:0009058 (biosynthetic process)
Up	Aradu.D5TAC	isocitrate dehydrogenase [NADP] [Glycine max]
Down	Aradu.U2VDV	isoflavone reductase homolog [Glycine max]%3B IPR008030 (NmrA-like)
Down	Aradu.3L8EK	isoflavone reductase homolog [Glycine max]%3B IPR008030 (NmrA-like)%2C IPR016040 (NAD(P)-binding domain)
Down	Aradu.12ETV	jasmonic acid carboxyl methyltransferase%3B IPR005299 (SAM dependent carboxyl methyltransferase)%3B GO:0008168 (methyltransferase activity)
Down	Aradu.XDK6H	K+ efflux antiporter 5%3B IPR006153 (Cation/H+ exchanger)%3B GO:0006812 (cation transport)%2C GO:0015299 (solute:hydrogen antiporter activity)%2C GO:0016021 (integral component of membrane)%2C GO:0055085 (transmembrane transport)
Down	Araip.WF9CR	K-box region and MADS-box transcription factor family protein%3B IPR002487 (Transcription factor%2C K-box)%3B GO:0003700 (sequence-specific DNA binding transcription factor activity)%2C GO:0005634 (nucleus)
Down	Aradu.RE11G	KDEL motif-containing protein 2-like isoform X2 [Glycine max]%3B IPR006598 (Lipopolysaccharide-modifying protein)
Down	Aradu.HD87I	KDEL motif-containing protein 2-like isoform X2 [Glycine max]%3B IPR006598 (Lipopolysaccharide-modifying protein)
Up	Aradu.RDI6I	kelch domain-containing protein 4-like isoform X2 [Glycine max]%3B IPR000014 (PAS domain)%2C IPR001810 (F-box domain)%2C IPR015915 (Kelch-type beta propeller)%3B GO:0004871 (signal transducer activity)%2C GO:0005515 (protein binding)%2C GO:0007165 (signal transduction)
Up	Aradu.7D57J	kelch repeat F-box protein%3B IPR001810 (F-box domain)%2C IPR015916 (Galactose oxidase%2C beta-propeller)%3B GO:0005515 (protein binding)
Down	Araip.SD833	Kinase interacting (KIP1-like) family protein%3B IPR011684 (KIP1-like)
Down	Aradu.0C0S7	Kinase interacting (KIP1-like) family protein%3B IPR011684 (KIP1-like)
Down	Aradu.WTS4M	kunitz trypsin inhibitor 1%3B IPR002160 (Proteinase inhibitor I3%2C Kunitz legume)%3B GO:0004866 (endopeptidase inhibitor activity)
Down	Aradu.SI6TC	kxDL motif-containing protein CG10681-like isoform X1 [Glycine max]%3B IPR019371 (Uncharacterised domain KxDL)
Up	Aradu.FWV05	lactate/malate dehydrogenase family protein
Up	Araip.866FF	lactate/malate dehydrogenase family protein%3B IPR010945 (Malate dehydrogenase%2C type 2)%3B GO:0003824 (catalytic activity)%2C GO:0005975 (carbohydrate metabolic process)%2C GO:0006108 (malate metabolic process)%2C GO:0016491 (oxidoreductase activity)%2C GO:0016615 (malate dehydrogenase activity)%2C GO:0046554 (malate dehydrogenase (NADP+) activity)%2C GO:0055114 (oxidation-reduction process)
Down	Aradu.TSZ7Q	Lactoylglutathione lyase / glyoxalase I family protein%3B IPR025870 (Glyoxalase-like domain)
Up	Aradu.51BBB	La-related protein 6 isoform 1 n%3D1 Tax%3DTheobroma cacao RepID%3DUPI00042B2C36%3B IPR010903 (Protein of unknown function DUF1517)
Down	Araip.B9ZKV	L-ascorbate oxidase homolog [Glycine max]%3B IPR008972 (Cupredoxin)%3B GO:0005507 (copper ion binding)%2C GO:0016491 (oxidoreductase activity)%2C GO:0055114 (oxidation-reduction process)
Down	Aradu.NJ2WV	L-ascorbate oxidase homolog [Glycine max]%3B IPR008972 (Cupredoxin)%3B GO:0005507 (copper ion binding)%2C GO:0016491 (oxidoreductase activity)%2C GO:0055114 (oxidation-reduction process)
Down	Aradu.SK1HP	L-ascorbate oxidase homolog [Glycine max]%3B IPR008972 (Cupredoxin)%3B GO:0005507 (copper ion binding)%2C GO:0016491 (oxidoreductase activity)%2C GO:0055114 (oxidation-reduction process)
Down	Aradu.DIN6F	L-ascorbate oxidase homolog [Glycine max]%3B IPR008972 (Cupredoxin)%3B GO:0005507 (copper ion binding)%2C GO:0016491 (oxidoreductase activity)%2C GO:0055114 (oxidation-reduction process)
Down	Aradu.8RX2Y	Late embryogenesis abundant (LEA) hydroxyproline-rich glycoprotein family%3B IPR004864 (Late embryogenesis abundant protein%2C LEA-14)
Down	Aradu.0T6EN	Late embryogenesis abundant hydroxyproline-rich glycofamily protein%2C putative n%3D1 Tax%3DTheobroma cacao RepID%3DUPI00042B232F%3B IPR004864 (Late embryogenesis abundant protein%2C LEA-14)
Down	Aradu.523JD	late embryogenesis abundant protein%3B IPR004864 (Late embryogenesis abundant protein%2C LEA-14)
Up	Aradu.5G5Y2	leaf ferredoxin-NADP reductase%3B IPR001433 (Oxidoreductase FAD/NAD(P)-binding)%2C IPR015701 (Ferredoxin--NADP reductase)%2C IPR017938 (Riboflavin synthase-like beta-barrel)%3B GO:0016491 (oxidoreductase activity)%2C GO:0055114 (oxidation-reduction process)
Up	Aradu.983Q0	leaf ferredoxin-NADP reductase%3B IPR001433 (Oxidoreductase FAD/NAD(P)-binding)%2C IPR015701 (Ferredoxin--NADP reductase)%2C IPR017938 (Riboflavin synthase-like beta-barrel)%3B GO:0016491 (oxidoreductase activity)%2C GO:0055114 (oxidation-reduction process)
Up	Aradu.6JI26	lecithin:cholesterol acyltransferase 3
Down	Araip.R5CHS	lecithin:cholesterol acyltransferase 3%3B IPR003386 (Lecithin:cholesterol/phospholipid:diacylglycerol acyltransferase)%3B GO:0006629 (lipid metabolic process)%2C GO:0008374 (O-acyltransferase activity)
Up	Aradu.WB5VJ	Lecithin:cholesterol acyltransferase family protein%3B IPR003386 (Lecithin:cholesterol/phospholipid:diacylglycerol acyltransferase)%3B GO:0006629 (lipid metabolic process)%2C GO:0008374 (O-acyltransferase activity)
Up	Aradu.71MQE	leguminosin group485 secreted peptide
Down	Aradu.4Z7GD	leguminosin group485 secreted peptide
Up	Aradu.EZW4U	leguminosin group485 secreted peptide%3B IPR010800 (Glycine rich protein)
Up	Araip.J5YNY	Leucine-rich repeat receptor-like protein kinase family protein
Down	Aradu.CRB2F	Leucine-rich repeat receptor-like protein kinase PEPR2 n%3D1 Tax%3DMedicago truncatula RepID%3DG7LBX4_MEDTR
Up	Aradu.ZX52Y	light harvesting-like protein%3B IPR022796 (Chlorophyll A-B binding protein)%2C IPR023329 (Chlorophyll a/b binding protein domain)
Up	Aradu.CF6WL	light harvesting-like protein%3B IPR023329 (Chlorophyll a/b binding protein domain)
Up	Araip.PY8RP	light-harvesting chlorophyll B-binding protein 3%3B IPR001344 (Chlorophyll A-B binding protein%2C plant)%2C IPR013744 (Protein of unknown function DUF1749)%2C IPR023329 (Chlorophyll a/b binding protein domain)%3B GO:0016020 (membrane)
Up	Aradu.TB0L3	light-harvesting chlorophyll B-binding protein 3%3B IPR022796 (Chlorophyll A-B binding protein)%2C IPR023329 (Chlorophyll a/b binding protein domain)%3B GO:0016020 (membrane)
Up	Aradu.V4M1G	light-harvesting chlorophyll B-binding protein 3%3B IPR022796 (Chlorophyll A-B binding protein)%2C IPR023329 (Chlorophyll a/b binding protein domain)%3B GO:0016020 (membrane)
Up	Aradu.L9MZU	light-harvesting chlorophyll B-binding protein 3%3B IPR022796 (Chlorophyll A-B binding protein)%2C IPR023329 (Chlorophyll a/b binding protein domain)%3B GO:0016020 (membrane)
Up	Aradu.KJ6HK	light-harvesting chlorophyll B-binding protein 3%3B IPR022796 (Chlorophyll A-B binding protein)%2C IPR023329 (Chlorophyll a/b binding protein domain)%3B GO:0016020 (membrane)
Up	Aradu.SGR1V	light-harvesting chlorophyll B-binding protein 3%3B IPR022796 (Chlorophyll A-B binding protein)%2C IPR023329 (Chlorophyll a/b binding protein domain)%3B GO:0016020 (membrane)
Up	Aradu.M64BQ	light-harvesting chlorophyll B-binding protein 3%3B IPR022796 (Chlorophyll A-B binding protein)%2C IPR023329 (Chlorophyll a/b binding protein domain)%3B GO:0016020 (membrane)
Up	Aradu.A2ZJG	light-harvesting chlorophyll B-binding protein 3%3B IPR022796 (Chlorophyll A-B binding protein)%2C IPR023329 (Chlorophyll a/b binding protein domain)%3B GO:0016020 (membrane)
Up	Aradu.53538	light-harvesting chlorophyll B-binding protein 3%3B IPR022796 (Chlorophyll A-B binding protein)%2C IPR023329 (Chlorophyll a/b binding protein domain)%3B GO:0016020 (membrane)
Up	Aradu.EV8G8	light-harvesting chlorophyll B-binding protein 3%3B IPR022796 (Chlorophyll A-B binding protein)%2C IPR023329 (Chlorophyll a/b binding protein domain)%3B GO:0016020 (membrane)
Up	Aradu.085I9	light-harvesting chlorophyll B-binding protein 3%3B IPR022796 (Chlorophyll A-B binding protein)%2C IPR023329 (Chlorophyll a/b binding protein domain)%3B GO:0016020 (membrane)
Down	Aradu.G6IAK	Light-sensor Protein kinase n%3D2 Tax%3DCeratodon purpureus RepID%3DPHY1_CERPU%3B IPR001294 (Phytochrome)%2C IPR005467 (Signal transduction histidine kinase%2C core)%3B GO:0000155 (phosphorelay sensor kinase activity)%2C GO:0004871 (signal transducer activity)%2C GO:0005515 (protein binding)%2C GO:0005524 (ATP binding)%2C GO:0007165 (signal transduction)%2C GO:0009584 (detection of visible light)…
Down	Araip.2KP3T	linoleate 13S-lipoxygenase 2-1%2C related protein%3B IPR000907 (Lipoxygenase)%2C IPR008976 (Lipase/lipooxygenase%2C PLAT/LH2)%2C IPR027433 (Lipoxygenase%2C domain 3)%3B GO:0005506 (iron ion binding)%2C GO:0005515 (protein binding)%2C GO:0016165 (linoleate 13S-lipoxygenase activity)%2C GO:0046872 (metal ion binding)%2C GO:0055114 (oxidation-reduction process)
Up	Aradu.5T2RZ	lipase 1%3B IPR000073 (Alpha/beta hydrolase fold-1)%2C IPR006693 (Partial AB-hydrolase lipase domain)%2C IPR025483 (Lipase%2C eukaryotic)%3B GO:0006629 (lipid metabolic process)
Down	Aradu.94HDK	Lipid transfer protein
Down	Aradu.117B0	Lipid transfer protein%3B IPR000528 (Plant lipid transfer protein/Par allergen)%2C IPR016140 (Bifunctional inhibitor/plant lipid transfer protein/seed storage helical domain)%3B GO:0006869 (lipid transport)%2C GO:0008289 (lipid binding)
Up	Aradu.VA62W	lipid-binding serum glycoprotein family protein%3B IPR017943 (Bactericidal permeability-increasing protein%2C alpha/beta domain)%3B GO:0008289 (lipid binding)
Up	Aradu.K75LB	lipocalin-like domain protein%3B IPR011038 (Calycin-like)
Down	Aradu.8D3SW	lipoxygenase 3
Down	Aradu.R27T4	LOB domain-containing protein 10%3B IPR004883 (Lateral organ boundaries%2C LOB)
Down	Aradu.U0BF0	LOB domain-containing protein 15%3B IPR004883 (Lateral organ boundaries%2C LOB)%2C IPR017987 (Wilm's tumour protein)
Down	Aradu.MCI5M	LOB domain-containing protein 18%3B IPR004883 (Lateral organ boundaries%2C LOB)
Down	Aradu.262YC	LOB domain-containing protein 4%3B IPR004883 (Lateral organ boundaries%2C LOB)
Down	Aradu.H2K8Y	LOB domain-containing protein 4%3B IPR004883 (Lateral organ boundaries%2C LOB)
Down	Aradu.14U3F	lon protease 1%3B IPR015947 (PUA-like domain)%2C IPR027065 (Lon protease)%2C IPR027417 (P-loop containing nucleoside triphosphate hydrolase)%3B GO:0000166 (nucleotide binding)%2C GO:0004176 (ATP-dependent peptidase activity)%2C GO:0004252 (serine-type endopeptidase activity)%2C GO:0005524 (ATP binding)%2C GO:0006508 (proteolysis)%2C GO:0006515 (misfolded or incompletely synthesized protein catabo…
Down	Araip.D1KQ3	lon protease 1%3B IPR015947 (PUA-like domain)%2C IPR027065 (Lon protease)%2C IPR027417 (P-loop containing nucleoside triphosphate hydrolase)%3B GO:0000166 (nucleotide binding)%2C GO:0004176 (ATP-dependent peptidase activity)%2C GO:0004252 (serine-type endopeptidase activity)%2C GO:0005524 (ATP binding)%2C GO:0006508 (proteolysis)%2C GO:0006515 (misfolded or incompletely synthesized protein catabo…
Up	Aradu.D7GNY	long chain acyl-CoA synthetase 9%3B IPR000873 (AMP-dependent synthetase/ligase)%3B GO:0003824 (catalytic activity)%2C GO:0008152 (metabolic process)
Up	Aradu.RRU3X	long-chain acyl-CoA synthetase 2%3B IPR000873 (AMP-dependent synthetase/ligase)%3B GO:0003824 (catalytic activity)%2C GO:0008152 (metabolic process)
Down	Aradu.W225Y	long-chain-alcohol oxidase FAO2-like protein%3B IPR012400 (Alcohol dehydrogenase%2C long-chain fatty)%3B GO:0046577 (long-chain-alcohol oxidase activity)%2C GO:0050660 (flavin adenine dinucleotide binding)%2C GO:0055114 (oxidation-reduction process)
Down	Aradu.MF6JY	LORELEI-LIKE-GPI-ANCHORED PROTEIN 1
Up	Araip.R569J	LRR and NB-ARC domain disease resistance protein
Down	Aradu.67TUI	LRR and NB-ARC domain disease resistance protein%3B IPR000767 (Disease resistance protein)%2C IPR001611 (Leucine-rich repeat)%2C IPR003591 (Leucine-rich repeat%2C typical subtype)%2C IPR006553 (Leucine-rich repeat%2C cysteine-containing subtype)%2C IPR027417 (P-loop containing nucleoside triphosphate hydrolase)%3B GO:0005515 (protein binding)%2C GO:0006952 (defense response)%2C GO:0043531 (ADP bi…
Down	Araip.KFZ2M	LRR and NB-ARC domain disease resistance protein%3B IPR000767 (Disease resistance protein)%2C IPR027417 (P-loop containing nucleoside triphosphate hydrolase)%3B GO:0006952 (defense response)%2C GO:0043531 (ADP binding)
Down	Aradu.I6BV9	LRR and NB-ARC domain disease resistance protein%3B IPR001611 (Leucine-rich repeat)%2C IPR002182 (NB-ARC)%2C IPR027417 (P-loop containing nucleoside triphosphate hydrolase)%3B GO:0005515 (protein binding)%2C GO:0043531 (ADP binding)
Down	Araip.IEF35	LRR and NB-ARC domain disease resistance protein%3B IPR002182 (NB-ARC)%2C IPR027417 (P-loop containing nucleoside triphosphate hydrolase)%3B GO:0043531 (ADP binding)
Up	Aradu.M5IDE	LSD1 zinc finger family protein%3B IPR005735 (Zinc finger%2C LSD1-type)
Up	Araip.FYP1G	L-type lectin-domain containing receptor kinase IX.1-like [Glycine max]%3B IPR008985 (Concanavalin A-like lectin/glucanases superfamily)%2C IPR013320 (Concanavalin A-like lectin/glucanase%2C subgroup)%3B GO:0030246 (carbohydrate binding)
Down	Aradu.35WGP	Lung seven transmembrane receptor family protein%3B IPR009637 (Transmembrane receptor%2C eukaryota)%3B GO:0016021 (integral component of membrane)
Up	Aradu.Q9U7S	LURP-one-like protein%3B IPR025659 (Tubby C-terminal-like domain)
Up	Aradu.0MN7Q	Lycopene beta/epsilon cyclase protein%3B IPR008671 (Lycopene cyclase-type%2C FAD-binding)%3B GO:0016117 (carotenoid biosynthetic process)
Up	Aradu.JTV49	lycopene cyclase%3B IPR008671 (Lycopene cyclase-type%2C FAD-binding)%3B GO:0016117 (carotenoid biosynthetic process)
Up	Araip.ZTM17	Lysine--tRNA ligase n%3D3 Tax%3DSolanum RepID%3DM1D5C6_SOLTU
Down	Aradu.7F8WJ	lysosomal beta glucosidase-like isoform X2 [Glycine max]%3B IPR002772 (Glycoside hydrolase family 3 C-terminal domain)%2C IPR017853 (Glycoside hydrolase%2C superfamily)%2C IPR026892 (Glycoside hydrolase family 3)%3B GO:0005975 (carbohydrate metabolic process)
Down	Aradu.M9TY2	MACPF domain-containing protein At4g24290-like isoform X5 [Glycine max]%3B IPR020864 (Membrane attack complex component/perforin (MACPF) domain)
Up	Araip.DW8GW	MADS-box protein isoform X1 [Glycine max]%3B IPR001892 (Ribosomal protein S13)%2C IPR002100 (Transcription factor%2C MADS-box)%2C IPR010979 (Ribosomal protein S13-like%2C H2TH)%3B GO:0003676 (nucleic acid binding)%2C GO:0003677 (DNA binding)%2C GO:0003723 (RNA binding)%2C GO:0003735 (structural constituent of ribosome)%2C GO:0005622 (intracellular)%2C GO:0005840 (ribosome)%2C GO:0006412 (translat…
Up	Aradu.91WCT	MADS-box transcription factor 15-like [Glycine max]%3B IPR002100 (Transcription factor%2C MADS-box)%3B GO:0003677 (DNA binding)%2C GO:0046983 (protein dimerization activity)
Up	Aradu.92XHB	MADS-box transcription factor 6 [Glycine max]%3B IPR002100 (Transcription factor%2C MADS-box)%2C IPR002487 (Transcription factor%2C K-box)%3B GO:0003677 (DNA binding)%2C GO:0003700 (sequence-specific DNA binding transcription factor activity)%2C GO:0005634 (nucleus)%2C GO:0046983 (protein dimerization activity)
Up	Aradu.P04DI	MADS-box transcription factor 6 [Glycine max]%3B IPR002100 (Transcription factor%2C MADS-box)%2C IPR002487 (Transcription factor%2C K-box)%3B GO:0003677 (DNA binding)%2C GO:0003700 (sequence-specific DNA binding transcription factor activity)%2C GO:0005634 (nucleus)%2C GO:0046983 (protein dimerization activity)
Down	Aradu.15PR5	MADS-box transcription factor 6 [Glycine max]%3B IPR002100 (Transcription factor%2C MADS-box)%3B GO:0003677 (DNA binding)%2C GO:0046983 (protein dimerization activity)
Up	Araip.8L1R3	MADS-box transcription factor family protein%3B IPR002100 (Transcription factor%2C MADS-box)%2C IPR002487 (Transcription factor%2C K-box)%3B GO:0003677 (DNA binding)%2C GO:0003700 (sequence-specific DNA binding transcription factor activity)%2C GO:0005634 (nucleus)%2C GO:0046983 (protein dimerization activity)
Down	Aradu.UG0RV	MADS-box transcription factor family protein%3B IPR002100 (Transcription factor%2C MADS-box)%2C IPR002487 (Transcription factor%2C K-box)%3B GO:0003677 (DNA binding)%2C GO:0003700 (sequence-specific DNA binding transcription factor activity)%2C GO:0005634 (nucleus)%2C GO:0046983 (protein dimerization activity)
Down	Aradu.H2R03	MADS-box transcription factor family protein%3B IPR002100 (Transcription factor%2C MADS-box)%2C IPR002487 (Transcription factor%2C K-box)%3B GO:0003677 (DNA binding)%2C GO:0003700 (sequence-specific DNA binding transcription factor activity)%2C GO:0005634 (nucleus)%2C GO:0046983 (protein dimerization activity)
Down	Araip.S4DRB	MADS-box transcription factor%3B IPR002487 (Transcription factor%2C K-box)%3B GO:0003700 (sequence-specific DNA binding transcription factor activity)%2C GO:0005634 (nucleus)
Up	Aradu.76H6A	magnesium (Mg) transporter 10%3B IPR002523 (Mg2+ transporter protein%2C CorA-like/Zinc transport protein ZntB)%2C IPR026573 (Magnesium transporter MRS2/LPE10)%3B GO:0015095 (magnesium ion transmembrane transporter activity)%2C GO:0015693 (magnesium ion transport)%2C GO:0016020 (membrane)%2C GO:0030001 (metal ion transport)%2C GO:0046873 (metal ion transmembrane transporter activity)%2C GO:0055085…
Up	Araip.0819Y	magnesium chelatase i2%3B IPR001173 (Glycosyltransferase 2-like)%2C IPR011775 (Magnesium chelatase%2C ATPase subunit I)%2C IPR027417 (P-loop containing nucleoside triphosphate hydrolase)%3B GO:0000166 (nucleotide binding)%2C GO:0005524 (ATP binding)%2C GO:0006779 (porphyrin-containing compound biosynthetic process)%2C GO:0015979 (photosynthesis)%2C GO:0015995 (chlorophyll biosynthetic process)%2C…
Up	Aradu.Q5DZL	magnesium chelatase i2%3B IPR011775 (Magnesium chelatase%2C ATPase subunit I)%2C IPR027417 (P-loop containing nucleoside triphosphate hydrolase)%3B GO:0000166 (nucleotide binding)%2C GO:0005524 (ATP binding)%2C GO:0006779 (porphyrin-containing compound biosynthetic process)%2C GO:0015979 (photosynthesis)%2C GO:0015995 (chlorophyll biosynthetic process)%2C GO:0016851 (magnesium chelatase activity)…
Up	Aradu.DRU5H	magnesium chelatase i2%3B IPR011776 (Magnesium chelatase%2C ATPase subunit D)%2C IPR027417 (P-loop containing nucleoside triphosphate hydrolase)%3B GO:0000166 (nucleotide binding)%2C GO:0005524 (ATP binding)%2C GO:0015979 (photosynthesis)%2C GO:0015995 (chlorophyll biosynthetic process)%2C GO:0016851 (magnesium chelatase activity)%2C GO:0017111 (nucleoside-triphosphatase activity)
Down	Aradu.31HAC	magnesium transporter 6%3B IPR026573 (Magnesium transporter MRS2/LPE10)%3B GO:0015095 (magnesium ion transmembrane transporter activity)%2C GO:0015693 (magnesium ion transport)
Down	Aradu.3J25S	magnesium transporter 9%3B IPR026573 (Magnesium transporter MRS2/LPE10)%3B GO:0015095 (magnesium ion transmembrane transporter activity)%2C GO:0015693 (magnesium ion transport)
Up	Aradu.581PV	magnesium transporter NIPA2-like isoform X2 [Glycine max]%3B IPR008521 (Magnesium transporter NIPA)%3B GO:0015095 (magnesium ion transmembrane transporter activity)%2C GO:0015693 (magnesium ion transport)%2C GO:0016020 (membrane)
Up	Aradu.T7E55	magnesium-protoporphyrin IX methyltransferase%3B IPR007848 (Methyltransferase small domain)%2C IPR010251 (Magnesium-protoporphyrin IX methyltransferase)%3B GO:0008168 (methyltransferase activity)%2C GO:0015995 (chlorophyll biosynthetic process)%2C GO:0046406 (magnesium protoporphyrin IX methyltransferase activity)
Up	Aradu.XPZ1I	magnesium-protoporphyrin IX monomethyl ester cyclase%3B IPR003251 (Rubrerythrin)%2C IPR008434 (Magnesium-protoporphyrin IX monomethyl ester aerobic oxidative cyclase)%3B GO:0015979 (photosynthesis)%2C GO:0015995 (chlorophyll biosynthetic process)%2C GO:0016491 (oxidoreductase activity)%2C GO:0046872 (metal ion binding)%2C GO:0048529 (magnesium-protoporphyrin IX monomethyl ester (oxidative) cyclas…
Up	Araip.21TCR	major intrinsic protein (MIP) family transporter%3B IPR000425 (Major intrinsic protein)%2C IPR023271 (Aquaporin-like)%3B GO:0005215 (transporter activity)%2C GO:0006810 (transport)%2C GO:0016020 (membrane)
Up	Aradu.J5HIY	malate dehydrogenase%3B IPR001557 (L-lactate/malate dehydrogenase)%3B GO:0003824 (catalytic activity)%2C GO:0005975 (carbohydrate metabolic process)%2C GO:0006108 (malate metabolic process)%2C GO:0016491 (oxidoreductase activity)%2C GO:0016615 (malate dehydrogenase activity)%2C GO:0030060 (L-malate dehydrogenase activity)%2C GO:0044262 (cellular carbohydrate metabolic process)%2C GO:0055114 (oxid…
Up	Aradu.PWW5S	malate dehydrogenase%3B IPR001557 (L-lactate/malate dehydrogenase)%3B GO:0003824 (catalytic activity)%2C GO:0005975 (carbohydrate metabolic process)%2C GO:0006108 (malate metabolic process)%2C GO:0016491 (oxidoreductase activity)%2C GO:0030060 (L-malate dehydrogenase activity)%2C GO:0044262 (cellular carbohydrate metabolic process)%2C GO:0055114 (oxidation-reduction process)
Up	Aradu.10VKJ	mannosylglycoprotein endo-beta-mannosidase-like [Glycine max]%3B IPR008979 (Galactose-binding domain-like)%2C IPR013812 (Glycoside hydrolase%2C family 2/20%2C immunoglobulin-like beta-sandwich domain)%2C IPR017853 (Glycoside hydrolase%2C superfamily)%2C IPR023232 (Glycoside hydrolase%2C family 2%2C active site)%2C IPR028787 (Mannosylglycoprotein endo-beta-mannosidase)%3B GO:0005975 (carbohydrate …
Up	Araip.Q8RJ3	MATE efflux family protein
Up	Aradu.Y55NJ	MATE efflux family protein%3B IPR002528 (Multi antimicrobial extrusion protein)%3B GO:0006855 (drug transmembrane transport)%2C GO:0015238 (drug transmembrane transporter activity)%2C GO:0015297 (antiporter activity)%2C GO:0016020 (membrane)%2C GO:0055085 (transmembrane transport)
Up	Aradu.W7K9Z	MATE efflux family protein%3B IPR002528 (Multi antimicrobial extrusion protein)%3B GO:0006855 (drug transmembrane transport)%2C GO:0015238 (drug transmembrane transporter activity)%2C GO:0015297 (antiporter activity)%2C GO:0016020 (membrane)%2C GO:0055085 (transmembrane transport)
Up	Aradu.9I9RF	MATE efflux family protein%3B IPR002528 (Multi antimicrobial extrusion protein)%3B GO:0006855 (drug transmembrane transport)%2C GO:0015238 (drug transmembrane transporter activity)%2C GO:0015297 (antiporter activity)%2C GO:0016020 (membrane)%2C GO:0055085 (transmembrane transport)
Down	Aradu.FDG48	MATE efflux family protein%3B IPR002528 (Multi antimicrobial extrusion protein)%3B GO:0006855 (drug transmembrane transport)%2C GO:0015238 (drug transmembrane transporter activity)%2C GO:0015297 (antiporter activity)%2C GO:0016020 (membrane)%2C GO:0055085 (transmembrane transport)
Up	Aradu.H9WXZ	maternal effect embryo arrest 14
Up	Aradu.TZ1M5	MD-2-related lipid recognition domain-containing protein%3B IPR014756 (Immunoglobulin E-set)
Down	Aradu.9B60Q	Mechanosensitive ion channel family protein%3B IPR006685 (Mechanosensitive ion channel MscS)%3B GO:0016020 (membrane)%2C GO:0055085 (transmembrane transport)
Up	Araip.6G6LV	mediator of RNA polymerase II transcription subunit 30%2C putative
Up	Araip.PF9C2	meiotically up-regulated protein 71-like protein%3B IPR002761 (DUF71 domain)%2C IPR006175 (YjgF/Yer057p/UK114 family)%2C IPR013813 (Endoribonuclease L-PSP/chorismate mutase-like)
Up	Aradu.RY6N7	membrane steroid binding protein 1%3B IPR001199 (Cytochrome b5-like heme/steroid binding domain)%3B GO:0020037 (heme binding)
Up	Aradu.A30Z4	Metal-dependent protein hydrolase%3B IPR003226 (Metal-dependent protein hydrolase)
Down	Aradu.7L2S4	metalloendoproteinase 1-like [Glycine max]%3B IPR021190 (Peptidase M10A)%2C IPR024079 (Metallopeptidase%2C catalytic domain)%3B GO:0004222 (metalloendopeptidase activity)%2C GO:0006508 (proteolysis)%2C GO:0008237 (metallopeptidase activity)%2C GO:0008270 (zinc ion binding)%2C GO:0031012 (extracellular matrix)
Up	Araip.H8UEI	Methionine S-adenosyl transferase n%3D1 Tax%3DDetonula confervacea RepID%3DB9ZZX3_DETCO%3B IPR002133 (S-adenosylmethionine synthetase)%3B GO:0004478 (methionine adenosyltransferase activity)%2C GO:0005524 (ATP binding)%2C GO:0006556 (S-adenosylmethionine biosynthetic process)
Up	Aradu.20JKI	methyl esterase 1
Up	Araip.93ESC	methylmalonate-semialdehyde dehydrogenase%3B IPR010061 (Methylmalonate-semialdehyde dehydrogenase)%2C IPR016161 (Aldehyde/histidinol dehydrogenase)%3B GO:0004491 (methylmalonate-semialdehyde dehydrogenase (acylating) activity)%2C GO:0008152 (metabolic process)%2C GO:0016491 (oxidoreductase activity)%2C GO:0055114 (oxidation-reduction process)
Up	Aradu.F8Z1P	Methyltransferase type 11 n%3D1 Tax%3DNostoc sp. PCC 7107 RepID%3DK9QA62_9NOSO%3B IPR013216 (Methyltransferase type 11)%3B GO:0008152 (metabolic process)%2C GO:0008168 (methyltransferase activity)
Down	Aradu.T83RP	microtubule-associated protein TORTIFOLIA1-like isoform X1 [Glycine max]%3B IPR016024 (Armadillo-type fold)%3B GO:0005488 (binding)
Down	Aradu.E5KC4	microtubule-associated protein TORTIFOLIA1-like isoform X1 [Glycine max]%3B IPR016024 (Armadillo-type fold)%3B GO:0005488 (binding)
Down	Aradu.96YCY	microtubule-associated protein TORTIFOLIA1-like isoform X3 [Glycine max]%3B IPR016024 (Armadillo-type fold)%3B GO:0005488 (binding)
Down	Aradu.B3V05	microtubule-binding protein TANGLED-like [Glycine max]
Down	Aradu.G8W4L	mitochondrial outer membrane protein porin 1-like [Glycine max]%3B IPR023614 (Porin domain)%2C IPR027246 (Eukaryotic porin/Tom40)%3B GO:0005741 (mitochondrial outer membrane)%2C GO:0055085 (transmembrane transport)
Down	Aradu.LY8JJ	mitochondrial processing peptidase alpha subunit%3B IPR011249 (Metalloenzyme%2C LuxS/M16 peptidase-like)%3B GO:0003824 (catalytic activity)%2C GO:0046872 (metal ion binding)
Down	Aradu.CTD68	mitochondrial substrate carrier family protein B-like [Glycine max]%3B IPR002067 (Mitochondrial carrier protein)%2C IPR023395 (Mitochondrial carrier domain)%3B GO:0055085 (transmembrane transport)
Down	Aradu.T0NTP	mitochondrial substrate carrier family protein B-like [Glycine max]%3B IPR002067 (Mitochondrial carrier protein)%2C IPR023395 (Mitochondrial carrier domain)%3B GO:0055085 (transmembrane transport)
Up	Aradu.R2E4D	mitochondrial substrate carrier family protein B-like [Glycine max]%3B IPR018108 (Mitochondrial substrate/solute carrier)%2C IPR023395 (Mitochondrial carrier domain)
Down	Aradu.XU2Q6	Mitochondrial substrate carrier family protein%3B IPR002030 (Mitochondrial brown fat uncoupling protein)%2C IPR023395 (Mitochondrial carrier domain)%3B GO:0006839 (mitochondrial transport)%2C GO:0031966 (mitochondrial membrane)
Down	Aradu.1I82D	mitochondrial substrate carrier family protein%3B IPR018108 (Mitochondrial substrate/solute carrier)%2C IPR023395 (Mitochondrial carrier domain)
Down	Aradu.0SE2F	mitotic checkpoint serine/threonine-protein kinase BUB1-like [Glycine max]%3B IPR015661 (Mitotic checkpoint serine/threonine protein kinase Bub1/Mitotic spindle checkpoint component Mad3)
Down	Aradu.SSV2N	MLO-like protein 12-like [Glycine max]%3B IPR004326 (Mlo-related protein)%3B GO:0006952 (defense response)%2C GO:0016021 (integral component of membrane)
Up	Araip.7RD3S	MLP-like protein 43%3B IPR000916 (Bet v I domain)%2C IPR023393 (START-like domain)%3B GO:0006952 (defense response)%2C GO:0009607 (response to biotic stimulus)
Up	Aradu.GZ6FH	MLP-like protein 43%3B IPR000916 (Bet v I domain)%2C IPR023393 (START-like domain)%3B GO:0006952 (defense response)%2C GO:0009607 (response to biotic stimulus)
Up	Aradu.VPD8U	Molybdenum cofactor sulfurase family protein%3B IPR005302 (Molybdenum cofactor sulfurase%2C C-terminal)%2C IPR011037 (Pyruvate kinase-like%2C insert domain)%3B GO:0003824 (catalytic activity)%2C GO:0030151 (molybdenum ion binding)%2C GO:0030170 (pyridoxal phosphate binding)
Up	Aradu.15REA	monoterpene synthase%3B IPR008930 (Terpenoid cyclases/protein prenyltransferase alpha-alpha toroid)%3B GO:0008152 (metabolic process)%2C GO:0010333 (terpene synthase activity)%2C GO:0016829 (lyase activity)
Up	Aradu.1S19J	multidrug resistance protein ABC transporter family protein
Down	Aradu.V15EE	multidrug resistance protein ABC transporter family protein%3B IPR025322 (Protein of unknown function DUF4228%2C plant)
Down	Aradu.91QLQ	multiple C2 and transmembrane domain-containing protein 2-like [Glycine max]%3B IPR000008 (C2 domain)%2C IPR013583 (Phosphoribosyltransferase C-terminal)%3B GO:0005515 (protein binding)
Up	Aradu.AT44H	myb family transcription factor APL-like isoform X1 [Glycine max]%3B IPR009057 (Homeodomain-like)%3B GO:0003677 (DNA binding)%2C GO:0003682 (chromatin binding)
Up	Aradu.74X9S	MYB transcription factor MYB109 [Glycine max]%3B IPR009057 (Homeodomain-like)%3B GO:0003677 (DNA binding)%2C GO:0003682 (chromatin binding)
Down	Aradu.U6514	MYB transcription factor MYB48 [Glycine max]%3B IPR009057 (Homeodomain-like)%3B GO:0003677 (DNA binding)%2C GO:0003682 (chromatin binding)
Up	Araip.9ZT6A	MYB transcription factor MYB51 [Glycine max]%3B IPR009057 (Homeodomain-like)%3B GO:0003677 (DNA binding)%2C GO:0003682 (chromatin binding)
Up	Araip.KEX5D	MYB transcription factor MYB60 [Glycine max]%3B IPR009057 (Homeodomain-like)%3B GO:0003677 (DNA binding)%2C GO:0003682 (chromatin binding)
Down	Aradu.FER0N	MYB transcription factor MYB64 [Glycine max]%3B IPR009057 (Homeodomain-like)%3B GO:0003677 (DNA binding)%2C GO:0003682 (chromatin binding)
Down	Aradu.Y8IAI	MYB transcription factor MYB64 [Glycine max]%3B IPR009057 (Homeodomain-like)%3B GO:0003677 (DNA binding)%2C GO:0003682 (chromatin binding)
Up	Aradu.HXE97	MYB transcription factor MYB98 [Glycine max]%3B IPR009057 (Homeodomain-like)%3B GO:0003677 (DNA binding)%2C GO:0003682 (chromatin binding)
Down	Aradu.IC1L6	MYB transcription factor MYB98 [Glycine max]%3B IPR009057 (Homeodomain-like)%3B GO:0003677 (DNA binding)%2C GO:0003682 (chromatin binding)
Down	Aradu.F8RAG	myb transcription factor%3B IPR009057 (Homeodomain-like)%3B GO:0003677 (DNA binding)%2C GO:0003682 (chromatin binding)
Down	Aradu.5W0HK	myb transcription factor%3B IPR009057 (Homeodomain-like)%3B GO:0003677 (DNA binding)%2C GO:0003682 (chromatin binding)
Down	Araip.XL5H0	myb transcription factor%3B IPR009057 (Homeodomain-like)%3B GO:0003677 (DNA binding)%2C GO:0003682 (chromatin binding)
Up	Araip.VAD3A	myb transcription factor%3B IPR009057 (Homeodomain-like)%3B GO:0003677 (DNA binding)%2C GO:0003682 (chromatin binding)
Up	Araip.A49CU	myb transcription factor%3B IPR009057 (Homeodomain-like)%3B GO:0003677 (DNA binding)%2C GO:0003682 (chromatin binding)
Down	Araip.UGD2T	myb transcription factor%3B IPR009057 (Homeodomain-like)%3B GO:0003677 (DNA binding)%2C GO:0003682 (chromatin binding)
Up	Aradu.IM8YW	myb transcription factor%3B IPR009057 (Homeodomain-like)%3B GO:0003677 (DNA binding)%2C GO:0003682 (chromatin binding)
Up	Aradu.T2ULI	myb transcription factor%3B IPR009057 (Homeodomain-like)%3B GO:0003677 (DNA binding)%2C GO:0003682 (chromatin binding)
Down	Aradu.K5WSC	myb transcription factor%3B IPR009057 (Homeodomain-like)%3B GO:0003677 (DNA binding)%2C GO:0003682 (chromatin binding)
Down	Aradu.G26I2	myb transcription factor%3B IPR009057 (Homeodomain-like)%3B GO:0003677 (DNA binding)%2C GO:0003682 (chromatin binding)
Down	Aradu.CT448	myb transcription factor%3B IPR009057 (Homeodomain-like)%3B GO:0003677 (DNA binding)%2C GO:0003682 (chromatin binding)
Down	Aradu.59AEA	myb transcription factor%3B IPR009057 (Homeodomain-like)%3B GO:0003677 (DNA binding)%2C GO:0003682 (chromatin binding)
Up	Aradu.8V97A	myb transcription factor%3B IPR009057 (Homeodomain-like)%3B GO:0003677 (DNA binding)%2C GO:0003682 (chromatin binding)
Up	Aradu.60KCI	myb transcription factor%3B IPR009057 (Homeodomain-like)%3B GO:0003677 (DNA binding)%2C GO:0003682 (chromatin binding)
Down	Aradu.5E0HP	Myblike DNA-binding domain containing protein n%3D1 Tax%3DAcanthamoeba castellanii str. Neff RepID%3DL8H867_ACACA%3B IPR009057 (Homeodomain-like)%3B GO:0003677 (DNA binding)%2C GO:0003682 (chromatin binding)
Down	Araip.1C050	Myblike DNA-binding domain containing protein n%3D1 Tax%3DAcanthamoeba castellanii str. Neff RepID%3DL8H867_ACACA%3B IPR009057 (Homeodomain-like)%3B GO:0003677 (DNA binding)%2C GO:0003682 (chromatin binding)
Down	Aradu.B78K2	Myblike DNA-binding domain containing protein n%3D1 Tax%3DAcanthamoeba castellanii str. Neff RepID%3DL8H867_ACACA%3B IPR009057 (Homeodomain-like)%3B GO:0003677 (DNA binding)%2C GO:0003682 (chromatin binding)
Down	Aradu.WQY6T	Myblike DNA-binding domain containing protein n%3D1 Tax%3DAcanthamoeba castellanii str. Neff RepID%3DL8H867_ACACA%3B IPR009057 (Homeodomain-like)%3B GO:0003677 (DNA binding)%2C GO:0003682 (chromatin binding)
Down	Aradu.VZ7S5	myb-like protein X-like isoform X2 [Glycine max]
Down	Aradu.65HV5	myo-inositol oxygenase 1%3B IPR007828 (Inositol oxygenase)%3B GO:0005506 (iron ion binding)%2C GO:0005737 (cytoplasm)%2C GO:0019310 (inositol catabolic process)%2C GO:0050113 (inositol oxygenase activity)%2C GO:0055114 (oxidation-reduction process)
Up	Aradu.L4E7U	myosin 2%3B IPR000048 (IQ motif%2C EF-hand binding site)%2C IPR001609 (Myosin head%2C motor domain)%2C IPR027417 (P-loop containing nucleoside triphosphate hydrolase)%3B GO:0003774 (motor activity)%2C GO:0005515 (protein binding)%2C GO:0005524 (ATP binding)%2C GO:0016459 (myosin complex)
Down	Aradu.MJ2Y3	Myosin heavy chain-related protein
Down	Araip.0RH9M	myosin heavy chain-related%3B IPR011684 (KIP1-like)
Up	Aradu.P1J6X	myosin-9-like isoform X1 [Glycine max]
Up	Araip.40NG2	myosin-G heavy chain-like [Glycine max]
Down	Aradu.N7KX1	n%3D1 Tax%3DOryza sativa subsp. japonica RepID%3DQ7XU62_ORYSJ%3B IPR004332 (Transposase%2C MuDR%2C plant)%2C IPR007527 (Zinc finger%2C SWIM-type)%3B GO:0008270 (zinc ion binding)
Down	Aradu.Z5H58	NAC domain containing protein 3%3B IPR003441 (NAC domain)%3B GO:0003677 (DNA binding)
Down	Aradu.USH95	NAC domain protein%2C%3B IPR003441 (NAC domain)%3B GO:0003677 (DNA binding)
Up	Aradu.ZLX26	N-acetylglucosaminyl-phosphatidylinositol (GPI) biosynthetic protein n%3D1 Tax%3DScheffersomyces stipitis (strain ATCC 58785 / CBS 6054 / NBRC 10063 / NRRL Y-11545) RepID%3DA3M0A1_PICST%3B IPR001296 (Glycosyl transferase%2C family 1)%2C IPR013234 (PIGA%2C GPI anchor biosynthesis)%3B GO:0006506 (GPI anchor biosynthetic process)%2C GO:0009058 (biosynthetic process)
Up	Aradu.21EXI	NAD kinase 2%3B IPR002504 (Inorganic polyphosphate/ATP-NAD kinase)%3B GO:0003951 (NAD+ kinase activity)%2C GO:0006741 (NADP biosynthetic process)%2C GO:0008152 (metabolic process)%2C GO:0019674 (NAD metabolic process)
Down	Aradu.KG1H9	NAD(P)-binding Rossmann-fold superfamily protein%3B IPR002198 (Short-chain dehydrogenase/reductase SDR)%3B GO:0008152 (metabolic process)%2C GO:0016491 (oxidoreductase activity)
Up	Aradu.982S5	NAD(P)-binding Rossmann-fold superfamily protein%3B IPR002347 (Glucose/ribitol dehydrogenase)%3B GO:0008152 (metabolic process)%2C GO:0016491 (oxidoreductase activity)
Up	Aradu.Y5ZUN	NAD(P)-binding Rossmann-fold superfamily protein%3B IPR002347 (Glucose/ribitol dehydrogenase)%3B GO:0008152 (metabolic process)%2C GO:0016491 (oxidoreductase activity)
Down	Aradu.V6UVG	NAD(P)-binding Rossmann-fold superfamily protein%3B IPR002347 (Glucose/ribitol dehydrogenase)%3B GO:0008152 (metabolic process)%2C GO:0016491 (oxidoreductase activity)
Up	Aradu.BP0GU	NAD(P)-binding Rossmann-fold superfamily protein%3B IPR002347 (Glucose/ribitol dehydrogenase)%3B GO:0008152 (metabolic process)%2C GO:0016491 (oxidoreductase activity)
Up	Aradu.41JHI	NAD(P)-binding Rossmann-fold superfamily protein%3B IPR016040 (NAD(P)-binding domain)
Up	Aradu.F0EGY	NAD(P)-binding Rossmann-fold superfamily protein%3B IPR016040 (NAD(P)-binding domain)
Up	Aradu.JFA7C	NAD(P)H dehydrogenase 18
Up	Araip.QFX44	NAD(P)H-quinone oxidoreductase subunit K%3B IPR006138 (NADH-ubiquinone oxidoreductase%2C 20 Kd subunit)%2C IPR013081 (Photosystem II cytochrome b559%2C N-terminal)%3B GO:0008137 (NADH dehydrogenase (ubiquinone) activity)%2C GO:0009523 (photosystem II)%2C GO:0009539 (photosystem II reaction center)%2C GO:0009767 (photosynthetic electron transport chain)%2C GO:0015979 (photosynthesis)%2C GO:0016021…
Up	Aradu.H48T8	NAD(P)H-quinone oxidoreductase subunit M%3B IPR018922 (NAD(P)H-quinone oxidoreductase subunit M)%3B GO:0055114 (oxidation-reduction process)
Up	Aradu.AYN79	NAD-dependent epimerase/dehydratase n%3D1 Tax%3DLeptolyngbya sp. PCC 7376 RepID%3DK9PVG9_9CYAN%3B IPR016040 (NAD(P)-binding domain)
Up	Aradu.KTD39	NAD-dependent epimerase/dehydratase n%3D1 Tax%3DNostoc sp. PCC 7107 RepID%3DK9QIR6_9NOSO%3B IPR001509 (NAD-dependent epimerase/dehydratase)%2C IPR016040 (NAD(P)-binding domain)%3B GO:0003824 (catalytic activity)%2C GO:0044237 (cellular metabolic process)%2C GO:0050662 (coenzyme binding)
Up	Araip.W9BFQ	NAD-dependent malic enzyme 1%3B IPR001891 (Malic oxidoreductase)%3B GO:0004470 (malic enzyme activity)%2C GO:0004471 (malate dehydrogenase (decarboxylating) (NAD+) activity)%2C GO:0006108 (malate metabolic process)%2C GO:0051287 (NAD binding)%2C GO:0055114 (oxidation-reduction process)
Up	Aradu.Z19X2	NADH dehydrogenase subunit F n%3D10 Tax%3DEuphorbia RepID%3DH6TTD5_9ROSI%3B IPR002128 (NADH:ubiquinone/plastoquinone oxidoreductase%2C chloroplast chain 5%2C C-terminal)%3B GO:0008137 (NADH dehydrogenase (ubiquinone) activity)%2C GO:0042773 (ATP synthesis coupled electron transport)%2C GO:0055114 (oxidation-reduction process)
Up	Aradu.LSV4Q	NADH:ubiquinone oxidoreductase intermediate-associated protein 30%3B IPR008979 (Galactose-binding domain-like)%2C IPR013857 (NADH:ubiquinone oxidoreductase intermediate-associated protein 30)%2C IPR016040 (NAD(P)-binding domain)
Up	Aradu.J2M0X	NADH-quinone oxidoreductase subunit A n%3D2 Tax%3DGeraniaceae RepID%3DB7T3H6_9ROSI%3B IPR000440 (NADH:ubiquinone/plastoquinone oxidoreductase%2C chain 3)%3B GO:0008137 (NADH dehydrogenase (ubiquinone) activity)%2C GO:0055114 (oxidation-reduction process)
Up	Aradu.537E6	NADP-dependent alkenal double bond reductase%3B IPR002085 (Alcohol dehydrogenase superfamily%2C zinc-type)%2C IPR016040 (NAD(P)-binding domain)%2C IPR020843 (Polyketide synthase%2C enoylreductase)%3B GO:0008270 (zinc ion binding)%2C GO:0016491 (oxidoreductase activity)%2C GO:0055114 (oxidation-reduction process)
Up	Araip.F5MI5	NADP-malic enzyme 4%3B IPR001891 (Malic oxidoreductase)%3B GO:0004470 (malic enzyme activity)%2C GO:0004471 (malate dehydrogenase (decarboxylating) (NAD+) activity)%2C GO:0006108 (malate metabolic process)%2C GO:0055114 (oxidation-reduction process)
Up	Aradu.ZSZ74	Naphthoate synthase n%3D3 Tax%3DCucumis RepID%3DE5GBI7_CUCME%3B IPR001753 (Crotonase superfamily)%2C IPR014748 (Crontonase%2C C-terminal)%3B GO:0003824 (catalytic activity)%2C GO:0008152 (metabolic process)%2C GO:0009234 (menaquinone biosynthetic process)
Up	Aradu.BM5FL	NCS1 nucleoside transporter family protein n%3D2 Tax%3DStreptomyces RepID%3DJ2A304_9ACTO%3B IPR001248 (Permease%2C cytosine/purines%2C uracil%2C thiamine%2C allantoin)%3B GO:0015205 (nucleobase transmembrane transporter activity)%2C GO:0015851 (nucleobase transport)%2C GO:0016020 (membrane)
Down	Araip.TX94X	nematode resistance protein-like HSPRO2-like [Glycine max]%3B IPR009743 (Hs1pro-1%2C C-terminal)%2C IPR009869 (Hs1pro-1%2C N-terminal)
Down	Araip.0D8F4	nematode resistance protein-like HSPRO2-like [Glycine max]%3B IPR009743 (Hs1pro-1%2C C-terminal)%2C IPR009869 (Hs1pro-1%2C N-terminal)
Down	Aradu.FH0S1	NHL domain-containing protein%3B IPR011042 (Six-bladed beta-propeller%2C TolB-like)%3B GO:0005515 (protein binding)
Up	Aradu.Y48CE	nine-cis-epoxycarotenoid dioxygenase 4%3B IPR004294 (Carotenoid oxygenase)
Down	Aradu.W2C81	nitrate reductase 1%3B IPR001834 (NADH:cytochrome b5 reductase (CBR))%2C IPR008335 (Eukaryotic molybdopterin oxidoreductase)%2C IPR014756 (Immunoglobulin E-set)%2C IPR017938 (Riboflavin synthase-like beta-barrel)%3B GO:0005506 (iron ion binding)%2C GO:0009055 (electron carrier activity)%2C GO:0016491 (oxidoreductase activity)%2C GO:0020037 (heme binding)%2C GO:0030151 (molybdenum ion binding)%2C …
Up	Aradu.FZ81C	nitrate transporter 1.2-like [Glycine max]%3B IPR000109 (Proton-dependent oligopeptide transporter family)%2C IPR012677 (Nucleotide-binding%2C alpha-beta plait)%3B GO:0000166 (nucleotide binding)%2C GO:0003676 (nucleic acid binding)%2C GO:0005215 (transporter activity)%2C GO:0006810 (transport)%2C GO:0016020 (membrane)
Down	Aradu.MVI3C	NLI interacting factor-like phosphatase%3B IPR004274 (NLI interacting factor)%2C IPR023214 (HAD-like domain)%3B GO:0005515 (protein binding)
Up	Aradu.C0Q6Q	nodulin MtN21 /EamA-like transporter family protein
Up	Araip.Q6F18	nodulin MtN21 /EamA-like transporter family protein%3B IPR000620 (Drug/metabolite transporter)%3B GO:0016020 (membrane)
Down	Aradu.N3EHS	nodulin MtN21 /EamA-like transporter family protein%3B IPR000620 (Drug/metabolite transporter)%3B GO:0016020 (membrane)
Up	Aradu.PQ5HC	nodulin MtN21 /EamA-like transporter family protein%3B IPR000620 (Drug/metabolite transporter)%3B GO:0016020 (membrane)
Up	Araip.3233B	Nodulin-like / Major Facilitator Superfamily protein%3B IPR010658 (Nodulin-like)%2C IPR011701 (Major facilitator superfamily)%2C IPR016196 (Major facilitator superfamily domain%2C general substrate transporter)%3B GO:0016021 (integral component of membrane)%2C GO:0055085 (transmembrane transport)
Down	Aradu.H9FC2	Nodulin-like / Major Facilitator Superfamily protein%3B IPR010658 (Nodulin-like)%2C IPR016196 (Major facilitator superfamily domain%2C general substrate transporter)
Down	Araip.Y6K7H	Nodulin-like / Major Facilitator Superfamily protein%3B IPR010658 (Nodulin-like)%2C IPR016196 (Major facilitator superfamily domain%2C general substrate transporter)
Down	Aradu.9Q1AJ	Non-lysosomal glucosylceramidase%3B IPR014551 (Beta-glucosidase%2C GBA2 type)%2C IPR024462 (Beta-glucosidase%2C GBA2 type%2C N-terminal)%3B GO:0003824 (catalytic activity)%2C GO:0004348 (glucosylceramidase activity)%2C GO:0006665 (sphingolipid metabolic process)%2C GO:0006680 (glucosylceramide catabolic process)%2C GO:0016020 (membrane)%2C GO:0016021 (integral component of membrane)
Up	Araip.B7ND2	Non-specific lipid-transfer protein%2C putative%3B IPR000528 (Plant lipid transfer protein/Par allergen)%2C IPR016140 (Bifunctional inhibitor/plant lipid transfer protein/seed storage helical domain)%3B GO:0006869 (lipid transport)%2C GO:0008289 (lipid binding)
Down	Araip.NG3LN	Nop14 nucleolar-like protein
Down	Aradu.Z69AP	Nop14 nucleolar-like protein%3B IPR007276 (Nucleolar protein 14)%3B GO:0032040 (small-subunit processome)
Up	Aradu.U2R98	Nuclear pore complex protein Nup214 n%3D1 Tax%3DTheobroma cacao RepID%3DUPI00042B3178
Up	Aradu.YE2F8	nuclear transcription factor Y subunit A-10 isoform 2 [Glycine max]%3B IPR001289 (CCAAT-binding transcription factor%2C subunit B)%3B GO:0003700 (sequence-specific DNA binding transcription factor activity)
Up	Aradu.U6V8H	Nuclear transport factor 2 (NTF2) family protein
Up	Aradu.AP7U8	Nuclear transport factor 2 (NTF2) family protein
Up	Aradu.C4WL2	Nuclear transport factor 2 (NTF2) family protein%3B IPR018790 (Protein of unknown function DUF2358)
Up	Aradu.EGV3U	nucleoside diphosphate kinase 2%3B IPR001564 (Nucleoside diphosphate kinase)%3B GO:0004550 (nucleoside diphosphate kinase activity)%2C GO:0005524 (ATP binding)%2C GO:0006165 (nucleoside diphosphate phosphorylation)%2C GO:0006183 (GTP biosynthetic process)%2C GO:0006228 (UTP biosynthetic process)%2C GO:0006241 (CTP biosynthetic process)
Down	Aradu.MCK4G	nucleotide binding%3B nucleic acid binding%3B RNA binding%3B IPR006515 (Polyadenylate binding protein%2C human types 1%2C 2%2C 3%2C 4)%2C IPR012677 (Nucleotide-binding%2C alpha-beta plait)%3B GO:0000166 (nucleotide binding)%2C GO:0003676 (nucleic acid binding)%2C GO:0003723 (RNA binding)
Down	Araip.IU61G	nucleotide-sensitive chloride conductance regulator (ICln) family protein%3B IPR003521 (ICln)%3B GO:0000387 (spliceosomal snRNP assembly)
Down	Aradu.ZTH8V	nudix hydrolase homolog 4%3B IPR015797 (NUDIX hydrolase domain-like)%3B GO:0016787 (hydrolase activity)
Down	Aradu.XDS84	Nutrient reservoir%2C putative n%3D1 Tax%3DRicinus communis RepID%3DB9SKF4_RICCO%3B IPR006044 (11-S seed storage protein%2C plant)%3B GO:0045735 (nutrient reservoir activity)
Down	Aradu.1SQ20	O-acetyltransferase family protein%3B IPR012419 (Cas1p 10 TM acyl transferase domain)
Down	Araip.26R7H	O-acyltransferase (WSD1-like) family protein%3B IPR004255 (O-acyltransferase%2C WSD1%2C N-terminal)%3B GO:0004144 (diacylglycerol O-acyltransferase activity)%2C GO:0045017 (glycerolipid biosynthetic process)
Down	Aradu.JRG58	O-acyltransferase (WSD1-like) family protein%3B IPR009721 (O-acyltransferase%2C WSD1%2C C-terminal)%3B GO:0004144 (diacylglycerol O-acyltransferase activity)
Up	Araip.AQ4E4	Octicosapeptide/Phox/Bem1p (PB1) domain-containing protein / tetratricopeptide repeat (TPR)-containing protein%3B IPR011990 (Tetratricopeptide-like helical)%3B GO:0005515 (protein binding)
Up	Aradu.A1T14	oligopeptide transporter 7%3B IPR004813 (Oligopeptide transporter%2C OPT superfamily)%3B GO:0055085 (transmembrane transport)
Down	Aradu.K3RLW	Oligosaccharyl transferase subunit (Stt3)%2C putative n%3D2 Tax%3DTalaromyces RepID%3DB6QM75_PENMQ%3B IPR003674 (Oligosaccharyl transferase%2C STT3 subunit)%3B GO:0004576 (oligosaccharyl transferase activity)%2C GO:0006486 (protein glycosylation)%2C GO:0016020 (membrane)
Up	Aradu.YE87J	O-methyltransferase 1%3B IPR016461 (Caffeate O-methyltransferase (COMT) family)%3B GO:0008168 (methyltransferase activity)%2C GO:0008171 (O-methyltransferase activity)%2C GO:0046983 (protein dimerization activity)
Down	Aradu.PF1EJ	O-methyltransferase 1%3B IPR016461 (Caffeate O-methyltransferase (COMT) family)%3B GO:0008168 (methyltransferase activity)%2C GO:0008171 (O-methyltransferase activity)%2C GO:0046983 (protein dimerization activity)
Up	Araip.ZX2QX	O-methyltransferase family protein%3B IPR001077 (O-methyltransferase%2C family 2)%2C IPR004332 (Transposase%2C MuDR%2C plant)%3B GO:0008171 (O-methyltransferase activity)
Down	Aradu.V0XBT	O-methyltransferase family protein%3B IPR001077 (O-methyltransferase%2C family 2)%3B GO:0008171 (O-methyltransferase activity)
Up	Aradu.18W20	O-methyltransferase family protein%3B IPR016461 (Caffeate O-methyltransferase (COMT) family)%3B GO:0008168 (methyltransferase activity)%2C GO:0008171 (O-methyltransferase activity)%2C GO:0046983 (protein dimerization activity)
Down	Araip.M2RMY	O-methyltransferase family protein%3B IPR016461 (Caffeate O-methyltransferase (COMT) family)%3B GO:0008168 (methyltransferase activity)%2C GO:0008171 (O-methyltransferase activity)%2C GO:0046983 (protein dimerization activity)
Down	Aradu.P5H21	O-methyltransferase family protein%3B IPR016461 (Caffeate O-methyltransferase (COMT) family)%3B GO:0008168 (methyltransferase activity)%2C GO:0008171 (O-methyltransferase activity)%2C GO:0046983 (protein dimerization activity)
Up	Aradu.22D8R	O-methyltransferase family protein%3B IPR016461 (Caffeate O-methyltransferase (COMT) family)%3B GO:0008168 (methyltransferase activity)%2C GO:0008171 (O-methyltransferase activity)%2C GO:0046983 (protein dimerization activity)
Up	Aradu.4CT58	one helix protein%3B IPR023329 (Chlorophyll a/b binding protein domain)
Up	Araip.YX3P0	one-helix protein 2
Up	Aradu.CR30L	one-helix protein 2%3B IPR023329 (Chlorophyll a/b binding protein domain)
Up	Aradu.SUU7J	ORF-209%3B putative n%3D1 Tax%3DPhaseolus vulgaris RepID%3DQ04312_PHAVU
Up	Aradu.CT66K	Orf214 n%3D2 Tax%3DGlycine max RepID%3DQ01925_SOYBN
Up	Aradu.F8HCE	Orf214 n%3D2 Tax%3DGlycine max RepID%3DQ01925_SOYBN
Up	Aradu.DMA2C	Orf214 n%3D2 Tax%3DGlycine max RepID%3DQ01925_SOYBN
Down	Aradu.LR2WR	organellar single-stranded DNA binding protein 3%3B IPR000424 (Primosome PriB/single-strand DNA-binding)%3B GO:0003697 (single-stranded DNA binding)
Down	Aradu.4N10P	organic cation/carnitine transporter 2%3B IPR005828 (General substrate transporter)%2C IPR016196 (Major facilitator superfamily domain%2C general substrate transporter)%3B GO:0016021 (integral component of membrane)%2C GO:0022857 (transmembrane transporter activity)%2C GO:0055085 (transmembrane transport)
Down	Aradu.81KMB	organic cation/carnitine transporter 2%3B IPR005828 (General substrate transporter)%2C IPR016196 (Major facilitator superfamily domain%2C general substrate transporter)%3B GO:0016021 (integral component of membrane)%2C GO:0022857 (transmembrane transporter activity)%2C GO:0055085 (transmembrane transport)
Up	Aradu.BGS0W	organic cation/carnitine transporter 2%3B IPR005828 (General substrate transporter)%2C IPR016196 (Major facilitator superfamily domain%2C general substrate transporter)%3B GO:0016021 (integral component of membrane)%2C GO:0022857 (transmembrane transporter activity)%2C GO:0055085 (transmembrane transport)
Up	Aradu.UE0ET	organic cation/carnitine transporter 3%3B IPR016196 (Major facilitator superfamily domain%2C general substrate transporter)
Down	Aradu.EGL90	ovate family protein 11%3B IPR006458 (Ovate protein family%2C C-terminal)
Down	Aradu.EWV8T	ovate family protein 8%3B IPR006458 (Ovate protein family%2C C-terminal)
Up	Araip.I0RG1	Oxidoreductase%2C zinc-binding dehydrogenase family protein%3B IPR002085 (Alcohol dehydrogenase superfamily%2C zinc-type)%2C IPR016040 (NAD(P)-binding domain)%2C IPR020843 (Polyketide synthase%2C enoylreductase)%3B GO:0008270 (zinc ion binding)%2C GO:0016491 (oxidoreductase activity)%2C GO:0055114 (oxidation-reduction process)
Up	Aradu.DH828	Oxidoreductase%2C zinc-binding dehydrogenase family protein%3B IPR002085 (Alcohol dehydrogenase superfamily%2C zinc-type)%2C IPR016040 (NAD(P)-binding domain)%2C IPR020843 (Polyketide synthase%2C enoylreductase)%3B GO:0008270 (zinc ion binding)%2C GO:0016491 (oxidoreductase activity)%2C GO:0055114 (oxidation-reduction process)
Down	Aradu.9VB1R	Oxidoreductase%2C zinc-binding dehydrogenase family protein%3B IPR002085 (Alcohol dehydrogenase superfamily%2C zinc-type)%2C IPR016040 (NAD(P)-binding domain)%2C IPR020843 (Polyketide synthase%2C enoylreductase)%3B GO:0008270 (zinc ion binding)%2C GO:0016491 (oxidoreductase activity)%2C GO:0055114 (oxidation-reduction process)
Up	Aradu.7U8XS	Oxidoreductase%2C zinc-binding dehydrogenase family protein%3B IPR002085 (Alcohol dehydrogenase superfamily%2C zinc-type)%2C IPR016040 (NAD(P)-binding domain)%2C IPR020843 (Polyketide synthase%2C enoylreductase)%3B GO:0008270 (zinc ion binding)%2C GO:0016491 (oxidoreductase activity)%2C GO:0055114 (oxidation-reduction process)
Up	Aradu.ND3NM	oxidoreductase%2C zinc-binding dehydrogenase family protein%3B IPR002085 (Alcohol dehydrogenase superfamily%2C zinc-type)%2C IPR016040 (NAD(P)-binding domain)%2C IPR020843 (Polyketide synthase%2C enoylreductase)%3B GO:0008270 (zinc ion binding)%2C GO:0016491 (oxidoreductase activity)%2C GO:0055114 (oxidation-reduction process)
Up	Aradu.Q9Y83	oxophytodienoate-reductase 3%3B IPR013785 (Aldolase-type TIM barrel)%3B GO:0003824 (catalytic activity)%2C GO:0010181 (FMN binding)%2C GO:0016491 (oxidoreductase activity)%2C GO:0055114 (oxidation-reduction process)
Up	Aradu.FL0YZ	oxygen-evolving enhancer protein%3B IPR008797 (Photosystem II PsbQ%2C oxygen evolving complex)%2C IPR023222 (PsbQ-like domain)%3B GO:0005509 (calcium ion binding)%2C GO:0009523 (photosystem II)%2C GO:0009654 (photosystem II oxygen evolving complex)%2C GO:0015979 (photosynthesis)%2C GO:0019898 (extrinsic component of membrane)
Up	Aradu.Y8LHL	oxygen-evolving enhancer protein%3B IPR008797 (Photosystem II PsbQ%2C oxygen evolving complex)%2C IPR023222 (PsbQ-like domain)%3B GO:0005509 (calcium ion binding)%2C GO:0009523 (photosystem II)%2C GO:0009654 (photosystem II oxygen evolving complex)%2C GO:0015979 (photosynthesis)%2C GO:0019898 (extrinsic component of membrane)
Up	Aradu.SJ887	oxygen-evolving enhancer protein%3B IPR008797 (Photosystem II PsbQ%2C oxygen evolving complex)%2C IPR023222 (PsbQ-like domain)%3B GO:0005509 (calcium ion binding)%2C GO:0009523 (photosystem II)%2C GO:0009654 (photosystem II oxygen evolving complex)%2C GO:0015979 (photosynthesis)%2C GO:0019898 (extrinsic component of membrane)
Up	Aradu.K16RE	Oxysterol-binding family protein%3B IPR000648 (Oxysterol-binding protein)
Up	Araip.NV86K	Oxysterol-binding family protein%3B IPR000648 (Oxysterol-binding protein)
Up	Araip.6VG98	paired amphipathic helix protein Sin3-like 4-like isoform X4 [Glycine max]%3B IPR003822 (Paired amphipathic helix)%2C IPR018247 (EF-Hand 1%2C calcium-binding site)%3B GO:0005634 (nucleus)
Down	Aradu.V2Z0U	Papain family cysteine protease%3B IPR013128 (Peptidase C1A)%3B GO:0006508 (proteolysis)%2C GO:0008234 (cysteine-type peptidase activity)
Down	Aradu.BDU45	PAR1 protein%3B IPR009489 (PAR1)
Down	Aradu.G5LQM	PATATIN-like protein 4%3B IPR016035 (Acyl transferase/acyl hydrolase/lysophospholipase)%3B GO:0008152 (metabolic process)
Up	Aradu.YW2J0	patatin-like protein 6%3B IPR016035 (Acyl transferase/acyl hydrolase/lysophospholipase)%3B GO:0006629 (lipid metabolic process)%2C GO:0008152 (metabolic process)
Down	Aradu.ZJZ3Y	pathogenesis-related homeodomain protein isoform X1 [Glycine max]%3B IPR009057 (Homeodomain-like)%2C IPR013083 (Zinc finger%2C RING/FYVE/PHD-type)%3B GO:0003677 (DNA binding)%2C GO:0003700 (sequence-specific DNA binding transcription factor activity)%2C GO:0005515 (protein binding)%2C GO:0008270 (zinc ion binding)%2C GO:0043565 (sequence-specific DNA binding)
Up	Aradu.9G825	Pathogenesis-related thaumatin superfamily protein%3B IPR001938 (Thaumatin)
Down	Aradu.EMG6I	Pathogenesis-related thaumatin superfamily protein%3B IPR001938 (Thaumatin)
Down	Aradu.G3DHZ	Pectate lyase family protein%3B IPR011050 (Pectin lyase fold/virulence factor)%2C IPR018082 (AmbAllergen)
Down	Aradu.TEF34	Pectate lyase family protein%3B IPR011050 (Pectin lyase fold/virulence factor)%2C IPR018082 (AmbAllergen)
Down	Aradu.J77I5	Pectate lyase family protein%3B IPR011050 (Pectin lyase fold/virulence factor)%2C IPR018082 (AmbAllergen)
Down	Aradu.Q78JW	Pectate lyase family protein%3B IPR011050 (Pectin lyase fold/virulence factor)%2C IPR018082 (AmbAllergen)
Down	Aradu.GR5W9	pectinesterase family protein%3B IPR011050 (Pectin lyase fold/virulence factor)%3B GO:0005618 (cell wall)%2C GO:0030599 (pectinesterase activity)%2C GO:0042545 (cell wall modification)
Down	Aradu.SS4KQ	pectinesterase/pectinesterase inhibitor 18-like [Glycine max]%3B IPR006501 (Pectinesterase inhibitor domain)%2C IPR011050 (Pectin lyase fold/virulence factor)%3B GO:0004857 (enzyme inhibitor activity)%2C GO:0005618 (cell wall)%2C GO:0030599 (pectinesterase activity)%2C GO:0042545 (cell wall modification)
Down	Aradu.P1LA4	pectinesterase/pectinesterase inhibitor 3-like [Glycine max]%3B IPR006501 (Pectinesterase inhibitor domain)%2C IPR011050 (Pectin lyase fold/virulence factor)%3B GO:0004857 (enzyme inhibitor activity)%2C GO:0005618 (cell wall)%2C GO:0030599 (pectinesterase activity)%2C GO:0042545 (cell wall modification)
Up	Aradu.KV1RH	Pentapeptide repeat-containing protein%3B IPR001646 (Pentapeptide repeat)
Up	Aradu.J7D69	Pentapeptide repeat-containing protein%3B IPR001646 (Pentapeptide repeat)
Up	Aradu.C6P70	Pentapeptide repeat-containing protein%3B IPR001646 (Pentapeptide repeat)
Up	Araip.V33RA	pentatricopeptide (PPR) repeat-containing protein
Down	Araip.66TWI	pentatricopeptide (PPR) repeat-containing protein%3B IPR002885 (Pentatricopeptide repeat)%2C IPR011990 (Tetratricopeptide-like helical)%3B GO:0005515 (protein binding)
Down	Aradu.A77EC	pentatricopeptide (PPR) repeat-containing protein%3B IPR002885 (Pentatricopeptide repeat)%2C IPR011990 (Tetratricopeptide-like helical)%3B GO:0005515 (protein binding)
Up	Aradu.BF8KJ	pentatricopeptide (PPR) repeat-containing protein%3B IPR002885 (Pentatricopeptide repeat)%2C IPR011990 (Tetratricopeptide-like helical)%3B GO:0005515 (protein binding)
Up	Araip.JN2ZB	Pentatricopeptide repeat (PPR) superfamily protein%3B IPR000266 (Ribosomal protein S17)%2C IPR002885 (Pentatricopeptide repeat)%2C IPR011990 (Tetratricopeptide-like helical)%2C IPR012340 (Nucleic acid-binding%2C OB-fold)%3B GO:0003735 (structural constituent of ribosome)%2C GO:0005515 (protein binding)%2C GO:0005622 (intracellular)%2C GO:0005840 (ribosome)%2C GO:0006412 (translation)
Down	Aradu.87AND	Pentatricopeptide repeat (PPR) superfamily protein%3B IPR001611 (Leucine-rich repeat)%2C IPR002885 (Pentatricopeptide repeat)%2C IPR003591 (Leucine-rich repeat%2C typical subtype)%2C IPR011009 (Protein kinase-like domain)%2C IPR011990 (Tetratricopeptide-like helical)%2C IPR013320 (Concanavalin A-like lectin/glucanase%2C subgroup)%2C IPR025875 (Leucine rich repeat 4)%3B GO:0004672 (protein kinase …
Down	Aradu.M6A79	Pentatricopeptide repeat (PPR) superfamily protein%3B IPR002885 (Pentatricopeptide repeat)
Up	Aradu.KQM6K	Pentatricopeptide repeat (PPR) superfamily protein%3B IPR002885 (Pentatricopeptide repeat)%2C IPR011990 (Tetratricopeptide-like helical)%2C IPR015797 (NUDIX hydrolase domain-like)%3B GO:0005515 (protein binding)%2C GO:0016787 (hydrolase activity)
Up	Aradu.GWQ57	Pentatricopeptide repeat (PPR) superfamily protein%3B IPR002885 (Pentatricopeptide repeat)%2C IPR011990 (Tetratricopeptide-like helical)%3B GO:0005515 (protein binding)
Down	Aradu.P6AFP	Pentatricopeptide repeat (PPR) superfamily protein%3B IPR002885 (Pentatricopeptide repeat)%2C IPR011990 (Tetratricopeptide-like helical)%3B GO:0005515 (protein binding)
Down	Aradu.PXP24	Pentatricopeptide repeat (PPR) superfamily protein%3B IPR002885 (Pentatricopeptide repeat)%2C IPR011990 (Tetratricopeptide-like helical)%3B GO:0005515 (protein binding)
Up	Aradu.Q2VZ9	Pentatricopeptide repeat (PPR) superfamily protein%3B IPR002885 (Pentatricopeptide repeat)%2C IPR011990 (Tetratricopeptide-like helical)%3B GO:0005515 (protein binding)
Up	Aradu.RR75T	Pentatricopeptide repeat (PPR) superfamily protein%3B IPR002885 (Pentatricopeptide repeat)%2C IPR011990 (Tetratricopeptide-like helical)%3B GO:0005515 (protein binding)
Down	Araip.8A60J	Pentatricopeptide repeat (PPR) superfamily protein%3B IPR002885 (Pentatricopeptide repeat)%2C IPR011990 (Tetratricopeptide-like helical)%3B GO:0005515 (protein binding)
Up	Araip.BCQ7T	Pentatricopeptide repeat (PPR) superfamily protein%3B IPR002885 (Pentatricopeptide repeat)%2C IPR011990 (Tetratricopeptide-like helical)%3B GO:0005515 (protein binding)
Down	Aradu.HJI4M	Pentatricopeptide repeat (PPR) superfamily protein%3B IPR002885 (Pentatricopeptide repeat)%2C IPR011990 (Tetratricopeptide-like helical)%3B GO:0005515 (protein binding)
Down	Aradu.6K8RX	Pentatricopeptide repeat (PPR) superfamily protein%3B IPR002885 (Pentatricopeptide repeat)%2C IPR011990 (Tetratricopeptide-like helical)%3B GO:0005515 (protein binding)
Down	Aradu.IT6D7	Pentatricopeptide repeat (PPR) superfamily protein%3B IPR002885 (Pentatricopeptide repeat)%2C IPR011990 (Tetratricopeptide-like helical)%3B GO:0005515 (protein binding)
Down	Aradu.J5C44	Pentatricopeptide repeat (PPR) superfamily protein%3B IPR002885 (Pentatricopeptide repeat)%2C IPR011990 (Tetratricopeptide-like helical)%3B GO:0005515 (protein binding)
Down	Aradu.B4Y17	Pentatricopeptide repeat (PPR) superfamily protein%3B IPR002885 (Pentatricopeptide repeat)%2C IPR011990 (Tetratricopeptide-like helical)%3B GO:0005515 (protein binding)
Down	Aradu.HUV25	Pentatricopeptide repeat (PPR) superfamily protein%3B IPR002885 (Pentatricopeptide repeat)%2C IPR011990 (Tetratricopeptide-like helical)%3B GO:0005515 (protein binding)
Down	Aradu.JQD1M	Pentatricopeptide repeat (PPR) superfamily protein%3B IPR002885 (Pentatricopeptide repeat)%2C IPR011990 (Tetratricopeptide-like helical)%3B GO:0005515 (protein binding)
Down	Aradu.1ZL4G	Pentatricopeptide repeat (PPR) superfamily protein%3B IPR002885 (Pentatricopeptide repeat)%2C IPR011990 (Tetratricopeptide-like helical)%3B GO:0005515 (protein binding)
Down	Aradu.A6T5Y	Pentatricopeptide repeat (PPR) superfamily protein%3B IPR002885 (Pentatricopeptide repeat)%2C IPR011990 (Tetratricopeptide-like helical)%3B GO:0005515 (protein binding)
Up	Aradu.14QL4	Pentatricopeptide repeat (PPR-like) superfamily protein%3B IPR002885 (Pentatricopeptide repeat)%2C IPR011990 (Tetratricopeptide-like helical)%3B GO:0005515 (protein binding)
Up	Aradu.5M8KA	Pentatricopeptide repeat (PPR-like) superfamily protein%3B IPR002885 (Pentatricopeptide repeat)%2C IPR011990 (Tetratricopeptide-like helical)%3B GO:0005515 (protein binding)
Up	Aradu.L4AW6	Peptidase M50 family protein
Up	Aradu.0T5YP	Peptide chain release factor 1%3B IPR000352 (Peptide chain release factor class I/class II)%2C IPR005139 (Peptide chain release factor)%2C IPR014720 (Double-stranded RNA-binding domain)%3B GO:0003747 (translation release factor activity)%2C GO:0005737 (cytoplasm)%2C GO:0006415 (translational termination)
Up	Aradu.YU0C1	Peptide chain release factor 1%3B IPR000352 (Peptide chain release factor class I/class II)%3B GO:0003747 (translation release factor activity)%2C GO:0006415 (translational termination)
Up	Aradu.ZV7WS	peptide chain release factor%2C putative%3B IPR000352 (Peptide chain release factor class I/class II)%2C IPR005139 (Peptide chain release factor)%2C IPR014720 (Double-stranded RNA-binding domain)%3B GO:0003747 (translation release factor activity)%2C GO:0005737 (cytoplasm)%2C GO:0006415 (translational termination)
Up	Aradu.VQB2Q	Peptide methionine sulfoxide reductase MsrB n%3D3 Tax%3DAlcaligenes RepID%3DJ0UW79_ALCFA%3B IPR011057 (Mss4-like)%2C IPR028427 (Peptide methionine sulfoxide reductase)%3B GO:0006979 (response to oxidative stress)%2C GO:0030091 (protein repair)%2C GO:0033743 (peptide-methionine (R)-S-oxide reductase activity)%2C GO:0055114 (oxidation-reduction process)
Up	Aradu.63K76	peptide transporter 1%3B IPR000109 (Proton-dependent oligopeptide transporter family)%2C IPR016196 (Major facilitator superfamily domain%2C general substrate transporter)%3B GO:0005215 (transporter activity)%2C GO:0006810 (transport)%2C GO:0016020 (membrane)
Down	Aradu.42JCX	peptide transporter 2%3B IPR000109 (Proton-dependent oligopeptide transporter family)%2C IPR016196 (Major facilitator superfamily domain%2C general substrate transporter)%3B GO:0005215 (transporter activity)%2C GO:0006810 (transport)%2C GO:0016020 (membrane)
Up	Aradu.JP0ZJ	peptide transporter 3%3B IPR000109 (Proton-dependent oligopeptide transporter family)%2C IPR016196 (Major facilitator superfamily domain%2C general substrate transporter)%3B GO:0005215 (transporter activity)%2C GO:0006810 (transport)%2C GO:0016020 (membrane)
Down	Araip.S3BVI	peptide/nitrate transporter%3B IPR000109 (Proton-dependent oligopeptide transporter family)%2C IPR016196 (Major facilitator superfamily domain%2C general substrate transporter)%3B GO:0005215 (transporter activity)%2C GO:0006810 (transport)%2C GO:0016020 (membrane)
Down	Aradu.PU63R	peptide/nitrate transporter%3B IPR000109 (Proton-dependent oligopeptide transporter family)%2C IPR016196 (Major facilitator superfamily domain%2C general substrate transporter)%3B GO:0005215 (transporter activity)%2C GO:0006810 (transport)%2C GO:0016020 (membrane)
Down	Aradu.Z0B0Q	peptide/nitrate transporter%3B IPR000109 (Proton-dependent oligopeptide transporter family)%2C IPR016196 (Major facilitator superfamily domain%2C general substrate transporter)%3B GO:0005215 (transporter activity)%2C GO:0006810 (transport)%2C GO:0016020 (membrane)
Down	Aradu.S2UYW	peptidyl-prolyl cis-trans isomerase CYP40-like isoform X1 [Glycine max]%3B IPR011990 (Tetratricopeptide-like helical)%2C IPR023566 (Peptidyl-prolyl cis-trans isomerase%2C FKBP-type)%3B GO:0005515 (protein binding)
Down	Aradu.1VP0H	Peptidyl-tRNA hydrolase family protein%3B IPR001328 (Peptidyl-tRNA hydrolase)%2C IPR013087 (Zinc finger C2H2-type/integrase DNA-binding domain)%3B GO:0003676 (nucleic acid binding)%2C GO:0004045 (aminoacyl-tRNA hydrolase activity)
Down	Aradu.X36X9	periodic tryptophan protein 2-like [Glycine max]%3B IPR007148 (Small-subunit processome%2C Utp12)%2C IPR015943 (WD40/YVTN repeat-like-containing domain)%2C IPR020472 (G-protein beta WD-40 repeat)%2C IPR027145 (Periodic tryptophan protein 2)%3B GO:0005515 (protein binding)
Down	Aradu.8IX5C	peroxidase 2%3B IPR010255 (Haem peroxidase)%3B GO:0004601 (peroxidase activity)%2C GO:0006979 (response to oxidative stress)%2C GO:0020037 (heme binding)%2C GO:0055114 (oxidation-reduction process)
Down	Aradu.PL2CZ	peroxidase 2%3B IPR010255 (Haem peroxidase)%3B GO:0004601 (peroxidase activity)%2C GO:0006979 (response to oxidative stress)%2C GO:0020037 (heme binding)%2C GO:0055114 (oxidation-reduction process)
Down	Aradu.UFI55	peroxidase 2%3B IPR010255 (Haem peroxidase)%3B GO:0004601 (peroxidase activity)%2C GO:0006979 (response to oxidative stress)%2C GO:0020037 (heme binding)%2C GO:0055114 (oxidation-reduction process)
Down	Araip.97GAP	Peroxidase superfamily protein%3B IPR010255 (Haem peroxidase)%3B GO:0004601 (peroxidase activity)%2C GO:0006979 (response to oxidative stress)%2C GO:0020037 (heme binding)%2C GO:0055114 (oxidation-reduction process)
Down	Aradu.R6A9X	Peroxidase superfamily protein%3B IPR010255 (Haem peroxidase)%3B GO:0004601 (peroxidase activity)%2C GO:0006979 (response to oxidative stress)%2C GO:0020037 (heme binding)%2C GO:0055114 (oxidation-reduction process)
Down	Aradu.YY51Q	Peroxidase superfamily protein%3B IPR010255 (Haem peroxidase)%3B GO:0004601 (peroxidase activity)%2C GO:0006979 (response to oxidative stress)%2C GO:0020037 (heme binding)%2C GO:0055114 (oxidation-reduction process)
Down	Aradu.IG70C	Peroxidase superfamily protein%3B IPR010255 (Haem peroxidase)%3B GO:0004601 (peroxidase activity)%2C GO:0006979 (response to oxidative stress)%2C GO:0020037 (heme binding)%2C GO:0055114 (oxidation-reduction process)
Up	Aradu.SQK9K	Peroxidase superfamily protein%3B IPR010255 (Haem peroxidase)%3B GO:0004601 (peroxidase activity)%2C GO:0006979 (response to oxidative stress)%2C GO:0020037 (heme binding)%2C GO:0055114 (oxidation-reduction process)
Down	Aradu.7XS8V	Peroxidase superfamily protein%3B IPR010255 (Haem peroxidase)%3B GO:0004601 (peroxidase activity)%2C GO:0006979 (response to oxidative stress)%2C GO:0020037 (heme binding)%2C GO:0055114 (oxidation-reduction process)
Down	Aradu.U3RTW	Peroxidase superfamily protein%3B IPR010255 (Haem peroxidase)%3B GO:0004601 (peroxidase activity)%2C GO:0006979 (response to oxidative stress)%2C GO:0020037 (heme binding)%2C GO:0055114 (oxidation-reduction process)
Up	Aradu.U8IBL	peroxisomal (S)-2-hydroxy-acid oxidase GLO1%3B IPR012133 (Alpha-hydroxy acid dehydrogenase%2C FMN-dependent)%2C IPR013785 (Aldolase-type TIM barrel)%3B GO:0003824 (catalytic activity)%2C GO:0010181 (FMN binding)%2C GO:0016491 (oxidoreductase activity)%2C GO:0055114 (oxidation-reduction process)
Up	Aradu.8VQ7U	peroxisomal biogenesis factor 11 family protein%3B IPR008733 (Peroxisomal biogenesis factor 11)%3B GO:0005779 (integral component of peroxisomal membrane)%2C GO:0016559 (peroxisome fission)
Down	Aradu.CU1UG	pfkB-like carbohydrate kinase family protein%3B IPR002139 (Ribokinase)%3B GO:0004747 (ribokinase activity)%2C GO:0006014 (D-ribose metabolic process)
Up	Aradu.6L75R	PGR5-LIKE A
Up	Aradu.33HIQ	PGR5-LIKE A
Up	Aradu.M6QZP	phenylalanyl-tRNA synthetase%2C putative / phenylalanine--tRNA ligase%2C putative%3B IPR004530 (Phenylalanyl-tRNA synthetase%2C class IIc%2C mitochondrial)%3B GO:0000049 (tRNA binding)%2C GO:0000166 (nucleotide binding)%2C GO:0000287 (magnesium ion binding)%2C GO:0004812 (aminoacyl-tRNA ligase activity)%2C GO:0004826 (phenylalanine-tRNA ligase activity)%2C GO:0005524 (ATP binding)%2C GO:0005737 (…
Up	Araip.42H02	phloem protein 2-A4%3B IPR025886 (Phloem protein 2-like)
Down	Aradu.3SF0M	phosphate transporter 1%3B 5%3B IPR005828 (General substrate transporter)%2C IPR016196 (Major facilitator superfamily domain%2C general substrate transporter)%3B GO:0005315 (inorganic phosphate transmembrane transporter activity)%2C GO:0006817 (phosphate ion transport)%2C GO:0016021 (integral component of membrane)%2C GO:0022857 (transmembrane transporter activity)%2C GO:0055085 (transmembrane tr…
Up	Aradu.3V9TC	phosphate transporter 4%3B 1%3B IPR011701 (Major facilitator superfamily)%2C IPR016196 (Major facilitator superfamily domain%2C general substrate transporter)%3B GO:0016021 (integral component of membrane)%2C GO:0055085 (transmembrane transport)
Up	Aradu.81HAH	phosphate transporter PHO1 homolog 1-like isoform 1 [Glycine max]%3B IPR004331 (SPX%2C N-terminal)%2C IPR004342 (EXS%2C C-terminal)%3B GO:0016021 (integral component of membrane)
Down	Aradu.1X84T	Phosphate-responsive 1 family protein%3B IPR006766 (Phosphate-induced protein 1)
Up	Aradu.TC2V6	Phosphatidate cytidylyltransferase family protein%3B IPR000374 (Phosphatidate cytidylyltransferase)%3B GO:0016020 (membrane)
Down	Aradu.FNF23	phosphatidylinositol 4-phosphate 5-kinase 4-like [Glycine max]%3B IPR003409 (MORN motif)
Down	Aradu.IX7GB	phosphatidylinositol 4-phosphate 5-kinase 4-like [Glycine max]%3B IPR003409 (MORN motif)
Down	Aradu.9RJ5C	Phosphatidylinositol-4-phosphate 5-kinase family protein%3B IPR023610 (Phosphatidylinositol-4-phosphate 5-kinase)%2C IPR027483 (Phosphatidylinositol-4-phosphate 5-kinase%2C C-terminal)%2C IPR027484 (Phosphatidylinositol-4-phosphate 5-kinase%2C N-terminal domain)%3B GO:0005524 (ATP binding)%2C GO:0016307 (phosphatidylinositol phosphate kinase activity)%2C GO:0016308 (1-phosphatidylinositol-4-phosp…
Down	Aradu.1TH42	phosphoenolpyruvate carboxylase 1
Down	Araip.6YH6X	phosphoenolpyruvate carboxylase 2%3B IPR021135 (Phosphoenolpyruvate carboxylase)%3B GO:0003824 (catalytic activity)%2C GO:0006099 (tricarboxylic acid cycle)%2C GO:0008964 (phosphoenolpyruvate carboxylase activity)%2C GO:0015977 (carbon fixation)
Up	Aradu.CK4T7	phosphoglucan%2C water dikinase%2C chloroplastic-like isoform X2 [Glycine max]%3B IPR013783 (Immunoglobulin-like fold)%2C IPR013784 (Carbohydrate-binding-like fold)%2C IPR015902 (Glycoside hydrolase%2C family 13)%3B GO:0003824 (catalytic activity)%2C GO:0030246 (carbohydrate binding)%2C GO:2001070 (starch binding)
Up	Aradu.4T64T	Phosphoglycerate mutase family protein%3B IPR013078 (Histidine phosphatase superfamily%2C clade-1)
Up	Aradu.KE4QA	Phosphoglycerate mutase family protein%3B IPR013078 (Histidine phosphatase superfamily%2C clade-1)
Up	Aradu.PF7M9	Phosphoglycerate mutase family protein%3B IPR013078 (Histidine phosphatase superfamily%2C clade-1)
Up	Aradu.J4XWG	phospholipase C 2%3B IPR001192 (Phosphoinositide phospholipase C family)%2C IPR011992 (EF-hand domain pair)%3B GO:0004435 (phosphatidylinositol phospholipase C activity)%2C GO:0005509 (calcium ion binding)%2C GO:0005515 (protein binding)%2C GO:0006629 (lipid metabolic process)%2C GO:0007165 (signal transduction)%2C GO:0008081 (phosphoric diester hydrolase activity)%2C GO:0035556 (intracellular si…
Down	Araip.03APC	phospholipase D P2%3B IPR000008 (C2 domain)%2C IPR015679 (Phospholipase D family)%2C IPR024632 (Phospholipase D%2C C-terminal)%3B GO:0003824 (catalytic activity)%2C GO:0005515 (protein binding)%2C GO:0008152 (metabolic process)
Down	Aradu.SYE4G	phospholipase D P2%3B IPR000008 (C2 domain)%2C IPR015679 (Phospholipase D family)%2C IPR024632 (Phospholipase D%2C C-terminal)%3B GO:0003824 (catalytic activity)%2C GO:0005515 (protein binding)%2C GO:0008152 (metabolic process)
Down	Aradu.W0B0I	phospholipase D Y%3B IPR001736 (Phospholipase D/Transphosphatidylase)%2C IPR025202 (Phospholipase D-like domain)%3B GO:0003824 (catalytic activity)%2C GO:0008152 (metabolic process)
Up	Aradu.R5JPX	phosphomethylpyrimidine synthase%2C chloroplastic-like isoform X2 [Glycine max]%3B IPR002817 (Thiamine biosynthesis protein ThiC)%2C IPR025747 (ThiC-associated domain)%3B GO:0009228 (thiamine biosynthetic process)%2C GO:0051536 (iron-sulfur cluster binding)
Up	Araip.F9NCS	phosphomevalonate kinase%3B IPR005916 (Phosphomevalonate kinase%2C eukaryotic)
Up	Aradu.L7ESN	phosphoribulokinase%3B IPR006082 (Phosphoribulokinase)%2C IPR027417 (P-loop containing nucleoside triphosphate hydrolase)%3B GO:0005524 (ATP binding)%2C GO:0005975 (carbohydrate metabolic process)%2C GO:0008152 (metabolic process)%2C GO:0008974 (phosphoribulokinase activity)%2C GO:0016301 (kinase activity)
Up	Aradu.Z7Z26	photosystem I assembly protein Ycf4%3B IPR003359 (Photosystem I Ycf4%2C assembly)%2C IPR003398 (Photosystem II PsbN)%3B GO:0009522 (photosystem I)%2C GO:0009523 (photosystem II)%2C GO:0009539 (photosystem II reaction center)%2C GO:0009579 (thylakoid)%2C GO:0015979 (photosynthesis)%2C GO:0016020 (membrane)%2C GO:0016021 (integral component of membrane)
Up	Araip.1SI1M	photosystem I reaction center subunit II%3B IPR003685 (Photosystem I PsaD)%3B GO:0009522 (photosystem I)%2C GO:0009538 (photosystem I reaction center)%2C GO:0015979 (photosynthesis)
Up	Aradu.CI3JS	photosystem I reaction center subunit III%3B IPR003666 (Photosystem I PsaF%2C reaction centre subunit III)%3B GO:0009522 (photosystem I)%2C GO:0009538 (photosystem I reaction center)%2C GO:0015979 (photosynthesis)
Up	Araip.65K58	photosystem I reaction center subunit IV A%3B IPR003375 (Photosystem I PsaE%2C reaction centre subunit IV)%3B GO:0009522 (photosystem I)%2C GO:0009538 (photosystem I reaction center)%2C GO:0015979 (photosynthesis)
Up	Aradu.IPP1D	photosystem I reaction center subunit IV A%3B IPR003375 (Photosystem I PsaE%2C reaction centre subunit IV)%3B GO:0009522 (photosystem I)%2C GO:0009538 (photosystem I reaction center)%2C GO:0015979 (photosynthesis)
Up	Aradu.B4GBB	photosystem I reaction center subunit IV A%3B IPR003375 (Photosystem I PsaE%2C reaction centre subunit IV)%3B GO:0009522 (photosystem I)%2C GO:0009538 (photosystem I reaction center)%2C GO:0015979 (photosynthesis)
Up	Aradu.Y6DMI	photosystem I reaction center subunit N%3B IPR008796 (Photosystem I PsaN%2C reaction centre subunit N)%3B GO:0005516 (calmodulin binding)%2C GO:0009522 (photosystem I)%2C GO:0015979 (photosynthesis)%2C GO:0042651 (thylakoid membrane)
Up	Aradu.2DC8X	photosystem I reaction center subunit V%3B IPR000549 (Photosystem I PsaG/PsaK protein)%2C IPR023618 (Photosystem I PsaG/PsaK domain)%3B GO:0009522 (photosystem I)%2C GO:0015979 (photosynthesis)%2C GO:0016020 (membrane)%2C GO:0016168 (chlorophyll binding)
Up	Aradu.09HBR	photosystem I reaction center subunit VI%3B IPR004928 (Photosystem I PsaH%2C reaction centre subunit VI)%3B GO:0009522 (photosystem I)%2C GO:0009538 (photosystem I reaction center)%2C GO:0015979 (photosynthesis)
Up	Araip.8E70L	photosystem I reaction center subunit X psaK%3B IPR000549 (Photosystem I PsaG/PsaK protein)%2C IPR023618 (Photosystem I PsaG/PsaK domain)%3B GO:0009522 (photosystem I)%2C GO:0015979 (photosynthesis)%2C GO:0016020 (membrane)%2C GO:0016168 (chlorophyll binding)
Up	Aradu.VTB62	photosystem I reaction center subunit XI%3B IPR003757 (Photosystem I PsaL%2C reaction centre subunit XI)%3B GO:0009522 (photosystem I)%2C GO:0009538 (photosystem I reaction center)%2C GO:0015979 (photosynthesis)
Up	Aradu.L5CRG	photosystem II 22 kDa protein%2C chloroplastic-like [Glycine max]%3B IPR022796 (Chlorophyll A-B binding protein)%2C IPR023329 (Chlorophyll a/b binding protein domain)
Up	Araip.PA84Q	Photosystem II chlorophyll a-binding protein CP43-like protein n%3D3 Tax%3DProchlorococcus marinus RepID%3DG3XCS8_PROMA%3B IPR000484 (Photosynthetic reaction centre%2C L/M)%2C IPR000932 (Photosystem antenna protein-like)%3B GO:0009521 (photosystem)%2C GO:0009767 (photosynthetic electron transport chain)%2C GO:0009772 (photosynthetic electron transport in photosystem II)%2C GO:0016020 (membrane)%2…
Up	Aradu.PG5TU	Photosystem II chlorophyll-binding protein CP43 n%3D1 Tax%3DSymbiodinium sp. C3 RepID%3DU6EFN7_9DINO%3B IPR000484 (Photosynthetic reaction centre%2C L/M)%2C IPR000932 (Photosystem antenna protein-like)%3B GO:0009521 (photosystem)%2C GO:0009523 (photosystem II)%2C GO:0009767 (photosynthetic electron transport chain)%2C GO:0009772 (photosynthetic electron transport in photosystem II)%2C GO:0015979 …
Up	Araip.TV92J	Photosystem II chlorophyll-binding protein CP43 n%3D1 Tax%3DSymbiodinium sp. C3 RepID%3DU6EFN7_9DINO%3B IPR000484 (Photosynthetic reaction centre%2C L/M)%2C IPR000932 (Photosystem antenna protein-like)%3B GO:0009521 (photosystem)%2C GO:0009767 (photosynthetic electron transport chain)%2C GO:0009772 (photosynthetic electron transport in photosystem II)%2C GO:0016020 (membrane)%2C GO:0016168 (chlor…
Up	Aradu.4V5VR	photosystem II CP47 chlorophyll A apoprotein%3B IPR000932 (Photosystem antenna protein-like)%3B GO:0009521 (photosystem)%2C GO:0009523 (photosystem II)%2C GO:0009767 (photosynthetic electron transport chain)%2C GO:0015979 (photosynthesis)%2C GO:0016020 (membrane)%2C GO:0016168 (chlorophyll binding)
Up	Aradu.QQA9A	photosystem II CP47 chlorophyll A apoprotein%3B IPR000932 (Photosystem antenna protein-like)%3B GO:0009521 (photosystem)%2C GO:0009523 (photosystem II)%2C GO:0009767 (photosynthetic electron transport chain)%2C GO:0015979 (photosynthesis)%2C GO:0016020 (membrane)%2C GO:0016168 (chlorophyll binding)
Up	Aradu.IC47R	photosystem II CP47 chlorophyll A apoprotein%3B IPR000932 (Photosystem antenna protein-like)%3B GO:0009521 (photosystem)%2C GO:0009523 (photosystem II)%2C GO:0009767 (photosynthetic electron transport chain)%2C GO:0015979 (photosynthesis)%2C GO:0016020 (membrane)%2C GO:0016168 (chlorophyll binding)
Up	Aradu.V9MBP	photosystem II CP47 chlorophyll A apoprotein%3B IPR000932 (Photosystem antenna protein-like)%3B GO:0009521 (photosystem)%2C GO:0009767 (photosynthetic electron transport chain)%2C GO:0016020 (membrane)%2C GO:0016168 (chlorophyll binding)
Up	Aradu.72E8Y	photosystem II D1 precursor processing protein PSB27-H2%2C chloroplastic-like isoform X5 [Glycine max]%3B IPR025585 (Photosystem II Pbs27)%3B GO:0010207 (photosystem II assembly)
Up	Araip.G0SAF	photosystem II family protein%3B IPR025585 (Photosystem II Pbs27)%3B GO:0010207 (photosystem II assembly)
Up	Aradu.WQI06	Photosystem II oxygen evolving complex protein PsbP%2C 23 kD extrinsic protein n%3D2 Tax%3DCyanothece RepID%3DB1WR97_CYAA5%3B IPR002683 (Photosystem II PsbP%2C oxygen evolving complex)%3B GO:0005509 (calcium ion binding)%2C GO:0009523 (photosystem II)%2C GO:0009654 (photosystem II oxygen evolving complex)%2C GO:0015979 (photosynthesis)%2C GO:0019898 (extrinsic component of membrane)
Up	Aradu.DG7AI	Photosystem II oxygen evolving complex protein PsbP%2C 23 kD extrinsic protein n%3D2 Tax%3DCyanothece RepID%3DB1WR97_CYAA5%3B IPR002683 (Photosystem II PsbP%2C oxygen evolving complex)%3B GO:0005509 (calcium ion binding)%2C GO:0009523 (photosystem II)%2C GO:0009654 (photosystem II oxygen evolving complex)%2C GO:0015979 (photosynthesis)%2C GO:0019898 (extrinsic component of membrane)
Up	Aradu.Y0LQW	Photosystem II oxygen evolving complex protein PsbP%2C 23 kD extrinsic protein n%3D2 Tax%3DCyanothece RepID%3DB1WR97_CYAA5%3B IPR002683 (Photosystem II PsbP%2C oxygen evolving complex)%3B GO:0005509 (calcium ion binding)%2C GO:0009523 (photosystem II)%2C GO:0009654 (photosystem II oxygen evolving complex)%2C GO:0015979 (photosynthesis)%2C GO:0019898 (extrinsic component of membrane)
Up	Aradu.6I2E7	photosystem II oxygen-evolving enhancer protein%3B IPR002628 (Photosystem II PsbO%2C manganese-stabilising)%2C IPR011250 (Outer membrane protein/outer membrane enzyme PagP %2C beta-barrel)%3B GO:0005509 (calcium ion binding)%2C GO:0009279 (cell outer membrane)%2C GO:0009523 (photosystem II)%2C GO:0009654 (photosystem II oxygen evolving complex)%2C GO:0015979 (photosynthesis)%2C GO:0016021 (integr…
Up	Araip.IGH4N	photosystem II oxygen-evolving enhancer protein%3B IPR002628 (Photosystem II PsbO%2C manganese-stabilising)%2C IPR011250 (Outer membrane protein/outer membrane enzyme PagP %2C beta-barrel)%3B GO:0005509 (calcium ion binding)%2C GO:0009279 (cell outer membrane)%2C GO:0009523 (photosystem II)%2C GO:0009654 (photosystem II oxygen evolving complex)%2C GO:0015979 (photosynthesis)%2C GO:0016021 (integr…
Up	Aradu.91FNQ	photosystem II oxygen-evolving enhancer protein%3B IPR002628 (Photosystem II PsbO%2C manganese-stabilising)%2C IPR011250 (Outer membrane protein/outer membrane enzyme PagP %2C beta-barrel)%3B GO:0005509 (calcium ion binding)%2C GO:0009279 (cell outer membrane)%2C GO:0009523 (photosystem II)%2C GO:0009654 (photosystem II oxygen evolving complex)%2C GO:0015979 (photosynthesis)%2C GO:0016021 (integr…
Up	Aradu.ZQ4AK	photosystem II protein D1 [Glycine max]%3B IPR000484 (Photosynthetic reaction centre%2C L/M)%3B GO:0009055 (electron carrier activity)%2C GO:0009772 (photosynthetic electron transport in photosystem II)
Up	Araip.J0NWK	photosystem II reaction center protein Z%3B IPR002644 (Photosystem II PsbZ%2C reaction centre)%3B GO:0009523 (photosystem II)%2C GO:0009539 (photosystem II reaction center)%2C GO:0015979 (photosynthesis)%2C GO:0042549 (photosystem II stabilization)
Up	Aradu.UZX8A	photosystem II reaction center PSB28 protein%3B IPR005610 (Photosystem II Psb28%2C class 1)%3B GO:0009523 (photosystem II)%2C GO:0009654 (photosystem II oxygen evolving complex)%2C GO:0015979 (photosynthesis)%2C GO:0016020 (membrane)
Up	Aradu.D3S9M	photosystem II reaction center W%3B IPR009806 (Photosystem II PsbW%2C class 2)%3B GO:0009507 (chloroplast)%2C GO:0009523 (photosystem II)%2C GO:0015979 (photosynthesis)
Up	Aradu.FE7XB	photosystem II stability/assembly factor HCF136%2C chloroplastic-like [Glycine max]%3B IPR016705 (Photosynthesis system II assembly factor Ycf48/Hcf136)%2C IPR028203 (Photosynthesis system II assembly factor Ycf48/Hcf136-like domain)
Down	Araip.W3VK0	phragmoplast orienting kinesin 1
Up	Aradu.M4DGG	phytoene desaturase 3%3B IPR014102 (Phytoene desaturase)%2C IPR016040 (NAD(P)-binding domain)%3B GO:0016117 (carotenoid biosynthetic process)%2C GO:0016491 (oxidoreductase activity)%2C GO:0055114 (oxidation-reduction process)
Up	Aradu.SB00U	PHYTOENE SYNTHASE%3B IPR002060 (Squalene/phytoene synthase)%3B GO:0009058 (biosynthetic process)%2C GO:0016740 (transferase activity)
Down	Aradu.4F3JQ	phytosulfokine 4 precursor%3B IPR009438 (Phytosulfokine)%3B GO:0005576 (extracellular region)%2C GO:0008083 (growth factor activity)%2C GO:0008283 (cell proliferation)
Up	Aradu.DY6GW	phytosulfokines 3 [Glycine max]%3B IPR009438 (Phytosulfokine)%3B GO:0005576 (extracellular region)%2C GO:0008083 (growth factor activity)%2C GO:0008283 (cell proliferation)
Up	Aradu.MJ134	Plant invertase/pectin methylesterase inhibitor superfamily protein%3B IPR006501 (Pectinesterase inhibitor domain)%3B GO:0004857 (enzyme inhibitor activity)%2C GO:0030599 (pectinesterase activity)
Down	Araip.MP34A	Plant invertase/pectin methylesterase inhibitor superfamily protein%3B IPR006501 (Pectinesterase inhibitor domain)%3B GO:0004857 (enzyme inhibitor activity)%2C GO:0030599 (pectinesterase activity)
Down	Araip.18JNS	plant invertase/pectin methylesterase inhibitor%3B IPR006501 (Pectinesterase inhibitor domain)%3B GO:0004857 (enzyme inhibitor activity)%2C GO:0030599 (pectinesterase activity)
Down	Aradu.N741F	Plant natriuretic peptide A n%3D1 Tax%3DTheobroma cacao RepID%3DUPI00042B8031%3B IPR009009 (RlpA-like double-psi beta-barrel domain)
Up	Aradu.I9VUF	Plant protein 1589 of unknown function%3B IPR006476 (Conserved hypothetical protein CHP01589%2C plant)
Up	Araip.ITY0T	Plant protein 1589 of unknown function%3B IPR006476 (Conserved hypothetical protein CHP01589%2C plant)
Down	Aradu.AE0GD	Plant protein 1589 of unknown function%3B IPR006476 (Conserved hypothetical protein CHP01589%2C plant)
Up	Aradu.P9D5I	Plant transposase (Ptta/En/Spm family)%3B IPR004252 (Probable transposase%2C Ptta/En/Spm%2C plant)
Down	Aradu.HT46D	plant UBX domain-containing protein 2%3B IPR001012 (UBX domain)%2C IPR006567 (PUG domain)%2C IPR018997 (PUB domain)%3B GO:0005515 (protein binding)
Up	Aradu.STX5Y	plant/F4C21-7 protein%2C putative
Down	Aradu.WZD8V	plant/T10O8-60 protein
Up	Aradu.T9TSZ	plant-specific B3-DNA-binding domain protein%3B IPR006139 (D-isomer specific 2-hydroxyacid dehydrogenase%2C catalytic domain)%2C IPR015300 (DNA-binding pseudobarrel domain)%2C IPR016040 (NAD(P)-binding domain)%3B GO:0003677 (DNA binding)%2C GO:0008152 (metabolic process)%2C GO:0048037 (cofactor binding)%2C GO:0051287 (NAD binding)%2C GO:0055114 (oxidation-reduction process)
Up	Aradu.D1WS1	plasma membrane H+-ATPase%3B IPR001757 (Cation-transporting P-type ATPase)%2C IPR023214 (HAD-like domain)%2C IPR023298 (P-type ATPase%2C transmembrane domain)%3B GO:0000166 (nucleotide binding)%2C GO:0006200 (ATP catabolic process)%2C GO:0006754 (ATP biosynthetic process)%2C GO:0006812 (cation transport)%2C GO:0016021 (integral component of membrane)%2C GO:0016887 (ATPase activity)%2C GO:0019829 …
Down	Araip.ENC79	plasma membrane H+-ATPase%3B IPR001757 (Cation-transporting P-type ATPase)%2C IPR023214 (HAD-like domain)%3B GO:0006812 (cation transport)%2C GO:0016021 (integral component of membrane)%2C GO:0019829 (cation-transporting ATPase activity)
Up	Aradu.ZJQ7J	Plasma membrane mannitol transporter n%3D1 Tax%3DArachis hypogaea RepID%3DB2Z3Y4_ARAHY%3B IPR005828 (General substrate transporter)%2C IPR016196 (Major facilitator superfamily domain%2C general substrate transporter)%3B GO:0016020 (membrane)%2C GO:0016021 (integral component of membrane)%2C GO:0022857 (transmembrane transporter activity)%2C GO:0022891 (substrate-specific transmembrane transporter…
Up	Aradu.5EV1M	plastid developmental protein DAG
Up	Aradu.DK86D	Plastid ribosomal protein L1 large ribosomal subunit n%3D1 Tax%3DOstreococcus lucimarinus (strain CCE9901) RepID%3DA4S1C5_OSTLU%3B IPR016095 (Ribosomal protein L1%2C 3-layer alpha/beta-sandwich)%2C IPR023674 (Ribosomal protein L1-like)%2C IPR028364 (Ribosomal protein L1/ribosomal biogenesis protein)%3B GO:0003723 (RNA binding)%2C GO:0003735 (structural constituent of ribosome)%2C GO:0006412 (tran…
Up	Aradu.NJS73	plastid transcriptionally active 6
Up	Aradu.P3BR9	Plastid-lipid associated protein PAP / fibrillin family protein%3B IPR006843 (Plastid lipid-associated protein/fibrillin conserved domain)%3B GO:0005198 (structural molecule activity)%2C GO:0009507 (chloroplast)
Up	Aradu.2R9BM	Plastid-lipid associated protein PAP / fibrillin family protein%3B IPR006843 (Plastid lipid-associated protein/fibrillin conserved domain)%3B GO:0005198 (structural molecule activity)%2C GO:0009507 (chloroplast)
Up	Aradu.X3U5Y	Plastid-lipid associated protein PAP / fibrillin family protein%3B IPR006843 (Plastid lipid-associated protein/fibrillin conserved domain)%3B GO:0005198 (structural molecule activity)%2C GO:0009507 (chloroplast)
Up	Aradu.Y5Z1I	Plastid-lipid associated protein PAP / fibrillin family protein%3B IPR006843 (Plastid lipid-associated protein/fibrillin conserved domain)%3B GO:0005198 (structural molecule activity)%2C GO:0009507 (chloroplast)
Up	Aradu.18DQZ	Plastid-lipid associated protein PAP / fibrillin family protein%3B IPR006843 (Plastid lipid-associated protein/fibrillin conserved domain)%3B GO:0005198 (structural molecule activity)%2C GO:0009507 (chloroplast)
Up	Aradu.6JM4W	plastocyanin 1%3B IPR001235 (Blue (type 1) copper protein%2C plastocyanin-type)%3B GO:0005507 (copper ion binding)%2C GO:0009055 (electron carrier activity)
Up	Aradu.K0FM3	plastocyanin 1%3B IPR001235 (Blue (type 1) copper protein%2C plastocyanin-type)%3B GO:0005507 (copper ion binding)%2C GO:0009055 (electron carrier activity)
Down	Aradu.46VDC	PLATZ transcription factor family protein%3B IPR000315 (Zinc finger%2C B-box)%2C IPR006734 (Protein of unknown function DUF597)%3B GO:0005622 (intracellular)%2C GO:0008270 (zinc ion binding)
Up	Aradu.Q2AQJ	plectin-like isoform X3 [Glycine max]
Up	Aradu.86JNN	pleiotropic drug resistance 12%3B IPR013525 (ABC-2 type transporter)%2C IPR013581 (Plant PDR ABC transporter associated)%2C IPR027417 (P-loop containing nucleoside triphosphate hydrolase)%3B GO:0000166 (nucleotide binding)%2C GO:0005524 (ATP binding)%2C GO:0016020 (membrane)%2C GO:0016887 (ATPase activity)%2C GO:0017111 (nucleoside-triphosphatase activity)
Down	Aradu.1E97C	pleiotropic drug resistance 12%3B IPR013525 (ABC-2 type transporter)%2C IPR013581 (Plant PDR ABC transporter associated)%2C IPR027417 (P-loop containing nucleoside triphosphate hydrolase)%3B GO:0000166 (nucleotide binding)%2C GO:0005524 (ATP binding)%2C GO:0016020 (membrane)%2C GO:0016887 (ATPase activity)%2C GO:0017111 (nucleoside-triphosphatase activity)
Down	Aradu.Y1CQR	pleiotropic drug resistance 12%3B IPR013525 (ABC-2 type transporter)%2C IPR013581 (Plant PDR ABC transporter associated)%2C IPR027417 (P-loop containing nucleoside triphosphate hydrolase)%3B GO:0000166 (nucleotide binding)%2C GO:0005524 (ATP binding)%2C GO:0016020 (membrane)%2C GO:0016887 (ATPase activity)%2C GO:0017111 (nucleoside-triphosphatase activity)
Up	Araip.ZDM6B	pleiotropic drug resistance protein 2-like [Glycine max]%3B IPR003210 (Signal recognition particle%2C SRP14 subunit)%2C IPR009018 (Signal recognition particle%2C SRP9/SRP14 subunit)%2C IPR023329 (Chlorophyll a/b binding protein domain)%3B GO:0006614 (SRP-dependent cotranslational protein targeting to membrane)%2C GO:0008312 (7S RNA binding)%2C GO:0030942 (endoplasmic reticulum signal peptide bind…
Up	Araip.70DDH	P-loop containing nucleoside triphosphate hydrolases superfamily protein%3B IPR027417 (P-loop containing nucleoside triphosphate hydrolase)
Down	Aradu.1IM7V	P-loop containing nucleoside triphosphate hydrolases superfamily protein%3B IPR027417 (P-loop containing nucleoside triphosphate hydrolase)%3B GO:0000166 (nucleotide binding)%2C GO:0005524 (ATP binding)%2C GO:0017111 (nucleoside-triphosphatase activity)
Down	Aradu.826D1	Pollen Ole e 1 allergen and extensin family protein%3B IPR006041 (Pollen Ole e 1 allergen/extensin)
Up	Araip.49RC6	poly [ADP-ribose] polymerase 3 [Glycine max]%3B IPR008893 (WGR domain)
Up	Aradu.3NM3A	poly(A) polymerase 2%3B IPR014492 (Poly(A) polymerase)%3B GO:0003723 (RNA binding)%2C GO:0004652 (polynucleotide adenylyltransferase activity)%2C GO:0005634 (nucleus)%2C GO:0016779 (nucleotidyltransferase activity)%2C GO:0031123 (RNA 3'-end processing)%2C GO:0043631 (RNA polyadenylation)
Down	Aradu.0H703	polygalacturonase 4%3B IPR000743 (Glycoside hydrolase%2C family 28)%2C IPR011050 (Pectin lyase fold/virulence factor)%3B GO:0004650 (polygalacturonase activity)%2C GO:0005975 (carbohydrate metabolic process)
Up	Aradu.Y82HI	polygalacturonase 4%3B IPR000743 (Glycoside hydrolase%2C family 28)%2C IPR011050 (Pectin lyase fold/virulence factor)%3B GO:0004650 (polygalacturonase activity)%2C GO:0005975 (carbohydrate metabolic process)
Down	Aradu.DG6US	polygalacturonase 4%3B IPR000743 (Glycoside hydrolase%2C family 28)%2C IPR011050 (Pectin lyase fold/virulence factor)%3B GO:0004650 (polygalacturonase activity)%2C GO:0005975 (carbohydrate metabolic process)
Down	Aradu.214XN	polygalacturonase/glycoside hydrolase family protein%3B IPR000743 (Glycoside hydrolase%2C family 28)%2C IPR011050 (Pectin lyase fold/virulence factor)%3B GO:0004650 (polygalacturonase activity)%2C GO:0005975 (carbohydrate metabolic process)
Up	Aradu.5U11T	Polyketide cyclase/dehydrase and lipid transport superfamily protein
Up	Araip.00DYU	Polyketide cyclase/dehydrase and lipid transport superfamily protein%3B IPR002913 (START domain)%2C IPR023393 (START-like domain)%3B GO:0008289 (lipid binding)
Up	Araip.B3ERX	polyketide cyclase/dehydrase and lipid transporter%3B IPR005031 (Streptomyces cyclase/dehydrase)%2C IPR023393 (START-like domain)
Up	Aradu.1I73Q	polyketide cyclase/dehydrase and lipid transporter%3B IPR005031 (Streptomyces cyclase/dehydrase)%2C IPR023393 (START-like domain)
Down	Aradu.95FMB	polyribonucleotide nucleotidyltransferase%2C putative%3B IPR012162 (Polyribonucleotide nucleotidyltransferase)%2C IPR027408 (PNPase/RNase PH domain)%3B GO:0000175 (3'-5'-exoribonuclease activity)%2C GO:0003723 (RNA binding)%2C GO:0004654 (polyribonucleotide nucleotidyltransferase activity)%2C GO:0006396 (RNA processing)%2C GO:0006402 (mRNA catabolic process)
Down	Aradu.85A6E	polyvinylalcohol dehydrogenase-like protein%3B IPR011047 (Quinonprotein alcohol dehydrogenase-like superfamily)
Up	Araip.H26S9	post-GPI attachment-like factor-protein%3B IPR007217 (Per1-like)
Down	Aradu.F6BQP	Potassium transporter family protein%3B IPR003855 (K+ potassium transporter)%3B GO:0015079 (potassium ion transmembrane transporter activity)%2C GO:0016020 (membrane)%2C GO:0071805 (potassium ion transmembrane transport)
Down	Aradu.U6D7V	Pre-mRNA-splicing factor ini1%3B IPR005345 (PHF5-like)
Up	Aradu.HLP3A	preprotein translocase subunit SecY%3B IPR002208 (SecY/SEC61-alpha family)%2C IPR023201 (SecY subunit domain)%3B GO:0015031 (protein transport)%2C GO:0016020 (membrane)
Up	Aradu.6DR3K	probable 2-oxoglutarate/Fe(II)-dependent dioxygenase [Glycine max]%3B IPR005123 (Oxoglutarate/iron-dependent dioxygenase)%2C IPR027443 (Isopenicillin N synthase-like)%3B GO:0016491 (oxidoreductase activity)%2C GO:0055114 (oxidation-reduction process)
Down	Aradu.H92LC	probable 2-oxoglutarate/Fe(II)-dependent dioxygenase-like [Glycine max]%3B IPR005123 (Oxoglutarate/iron-dependent dioxygenase)%2C IPR026992 (Non-haem dioxygenase N-terminal domain)%2C IPR027443 (Isopenicillin N synthase-like)%3B GO:0016491 (oxidoreductase activity)%2C GO:0055114 (oxidation-reduction process)
Down	Aradu.G89XX	probable 2-oxoglutarate/Fe(II)-dependent dioxygenase-like [Glycine max]%3B IPR005123 (Oxoglutarate/iron-dependent dioxygenase)%2C IPR026992 (Non-haem dioxygenase N-terminal domain)%2C IPR027443 (Isopenicillin N synthase-like)%3B GO:0016491 (oxidoreductase activity)%2C GO:0055114 (oxidation-reduction process)
Down	Aradu.UV8JW	probable ADP-ribosylation factor GTPase-activating protein AGD11-like [Glycine max]%3B IPR000008 (C2 domain)%2C IPR001164 (Arf GTPase activating protein)%3B GO:0005515 (protein binding)%2C GO:0008060 (ARF GTPase activator activity)%2C GO:0008270 (zinc ion binding)%2C GO:0032312 (regulation of ARF GTPase activity)
Down	Aradu.1T2VN	probable beta-1%2C3-galactosyltransferase 19-like [Glycine max]%3B IPR002659 (Glycosyl transferase%2C family 31)%2C IPR008985 (Concanavalin A-like lectin/glucanases superfamily)%2C IPR013320 (Concanavalin A-like lectin/glucanase%2C subgroup)%3B GO:0006486 (protein glycosylation)%2C GO:0008378 (galactosyltransferase activity)%2C GO:0016020 (membrane)%2C GO:0030246 (carbohydrate binding)
Down	Araip.6L5KM	probable calcium-binding protein CML25-like [Glycine max]%3B IPR011992 (EF-hand domain pair)%3B GO:0005509 (calcium ion binding)
Down	Aradu.M9CLB	probable carbohydrate esterase At4g34215-like isoform X1 [Glycine max]%3B IPR005181 (Domain of unknown function DUF303%2C acetylesterase putative)
Up	Araip.H0ERG	probable carboxylesterase 12-like [Glycine max]%3B IPR002018 (Carboxylesterase%2C type B)%2C IPR013094 (Alpha/beta hydrolase fold-3)%3B GO:0008152 (metabolic process)%2C GO:0016787 (hydrolase activity)
Up	Aradu.1N0JJ	probable carboxylesterase 12-like [Glycine max]%3B IPR013094 (Alpha/beta hydrolase fold-3)%3B GO:0008152 (metabolic process)%2C GO:0016787 (hydrolase activity)
Up	Aradu.8E2ZD	probable carboxylesterase 12-like [Glycine max]%3B IPR013094 (Alpha/beta hydrolase fold-3)%3B GO:0008152 (metabolic process)%2C GO:0016787 (hydrolase activity)
Down	Aradu.4V0GE	probable carboxylesterase 13-like [Glycine max]%3B IPR013094 (Alpha/beta hydrolase fold-3)%3B GO:0008152 (metabolic process)%2C GO:0016787 (hydrolase activity)
Down	Aradu.TX9D6	probable carboxylesterase 15-like [Glycine max]%3B IPR013094 (Alpha/beta hydrolase fold-3)%3B GO:0008152 (metabolic process)%2C GO:0016787 (hydrolase activity)
Down	Araip.X7U4U	probable carboxylesterase 18-like [Glycine max]%3B IPR013094 (Alpha/beta hydrolase fold-3)%3B GO:0008152 (metabolic process)%2C GO:0016787 (hydrolase activity)
Up	Aradu.W4282	probable carboxylesterase 18-like [Glycine max]%3B IPR013094 (Alpha/beta hydrolase fold-3)%3B GO:0008152 (metabolic process)%2C GO:0016787 (hydrolase activity)
Down	Araip.WXB7T	probable CCR4-associated factor 1 homolog 11-like [Glycine max]%3B IPR006941 (Ribonuclease CAF1)%2C IPR012337 (Ribonuclease H-like domain)%3B GO:0003676 (nucleic acid binding)%2C GO:0005634 (nucleus)
Down	Aradu.57W40	probable CCR4-associated factor 1 homolog 7-like [Glycine max]%3B IPR006941 (Ribonuclease CAF1)%2C IPR012337 (Ribonuclease H-like domain)%3B GO:0003676 (nucleic acid binding)%2C GO:0005634 (nucleus)
Up	Aradu.MSS40	probable fatty acyl-CoA reductase 5-like [Glycine max]%3B IPR016040 (NAD(P)-binding domain)%2C IPR026055 (Fatty acyl-CoA reductase)%3B GO:0080019 (fatty-acyl-CoA reductase (alcohol-forming) activity)
Up	Aradu.4HQ1D	probable galacturonosyltransferase 4-like [Glycine max]%3B IPR002495 (Glycosyl transferase%2C family 8)
Down	Aradu.TG6FF	probable galacturonosyltransferase-like 3-like [Glycine max]%3B IPR002495 (Glycosyl transferase%2C family 8)
Down	Aradu.CAM8W	probable glucan endo-1%2C3-beta-glucosidase A6-like [Glycine max]%3B IPR000490 (Glycoside hydrolase%2C family 17)%2C IPR012946 (X8)%2C IPR017853 (Glycoside hydrolase%2C superfamily)%3B GO:0005975 (carbohydrate metabolic process)
Down	Aradu.LEE20	probable glycosyltransferase At3g07620-like [Glycine max]%3B IPR004263 (Exostosin-like)
Up	Aradu.YH2KM	probable glycosyltransferase At5g03795-like [Glycine max]%3B IPR004263 (Exostosin-like)
Up	Aradu.D6JKJ	probable inactive poly [ADP-ribose] polymerase SRO5-like isoform X1 [Glycine max]%3B IPR012317 (Poly(ADP-ribose) polymerase%2C catalytic domain)%2C IPR022003 (RST domain of plant C-terminal)%3B GO:0003950 (NAD+ ADP-ribosyltransferase activity)
Down	Aradu.WAB2C	probable methyltransferase PMT16-like [Glycine max]%3B IPR004159 (Putative S-adenosyl-L-methionine-dependent methyltransferase)%3B GO:0008168 (methyltransferase activity)
Down	Aradu.GRE8B	probable methyltransferase PMT16-like [Glycine max]%3B IPR004159 (Putative S-adenosyl-L-methionine-dependent methyltransferase)%3B GO:0008168 (methyltransferase activity)
Down	Aradu.Q6EZA	probable methyltransferase PMT16-like [Glycine max]%3B IPR004159 (Putative S-adenosyl-L-methionine-dependent methyltransferase)%3B GO:0008168 (methyltransferase activity)
Down	Aradu.F84KR	probable methyltransferase PMT26-like [Glycine max]%3B IPR004159 (Putative S-adenosyl-L-methionine-dependent methyltransferase)%3B GO:0008168 (methyltransferase activity)
Down	Araip.18KVG	probable methyltransferase PMT5-like [Glycine max]%3B IPR004159 (Putative S-adenosyl-L-methionine-dependent methyltransferase)%3B GO:0008168 (methyltransferase activity)
Down	Aradu.M4PQ9	probable methyltransferase PMT5-like isoform X2 [Glycine max]%3B IPR004159 (Putative S-adenosyl-L-methionine-dependent methyltransferase)%3B GO:0008168 (methyltransferase activity)
Down	Aradu.UM27E	probable mitochondrial chaperone BCS1-B-like [Glycine max]%3B IPR025753 (AAA-type ATPase%2C N-terminal domain)%2C IPR027417 (P-loop containing nucleoside triphosphate hydrolase)%3B GO:0000166 (nucleotide binding)%2C GO:0005524 (ATP binding)%2C GO:0017111 (nucleoside-triphosphatase activity)
Down	Araip.Q4283	probable mitochondrial import inner membrane translocase subunit TIM21-like [Glycine max]%3B IPR013261 (Mitochondrial import inner membrane translocase subunit Tim21)%3B GO:0005744 (mitochondrial inner membrane presequence translocase complex)%2C GO:0030150 (protein import into mitochondrial matrix)
Down	Aradu.U2UP6	probable mitochondrial-processing peptidase subunit beta-like [Glycine max]%3B IPR011249 (Metalloenzyme%2C LuxS/M16 peptidase-like)%3B GO:0003824 (catalytic activity)%2C GO:0004222 (metalloendopeptidase activity)%2C GO:0006508 (proteolysis)%2C GO:0046872 (metal ion binding)
Down	Araip.0T1HF	probable NOT transcription complex subunit VIP2-like isoform X4 [Glycine max]%3B IPR007282 (NOT2/NOT3/NOT5)%3B GO:0005634 (nucleus)
Down	Aradu.VHN28	probable pectinesterase/pectinesterase inhibitor 47-like [Glycine max]%3B IPR006501 (Pectinesterase inhibitor domain)%2C IPR011050 (Pectin lyase fold/virulence factor)%3B GO:0004857 (enzyme inhibitor activity)%2C GO:0005618 (cell wall)%2C GO:0030599 (pectinesterase activity)%2C GO:0042545 (cell wall modification)
Up	Aradu.0QP9J	probable peptide/nitrate transporter [Glycine max]%3B IPR000109 (Proton-dependent oligopeptide transporter family)%2C IPR016196 (Major facilitator superfamily domain%2C general substrate transporter)%3B GO:0005215 (transporter activity)%2C GO:0006810 (transport)%2C GO:0016020 (membrane)
Up	Aradu.LF3E5	probable plastid-lipid-associated protein 12%2C chloroplastic-like isoform X1 [Glycine max]%3B IPR006843 (Plastid lipid-associated protein/fibrillin conserved domain)%3B GO:0005198 (structural molecule activity)%2C GO:0009507 (chloroplast)
Up	Aradu.7C6M7	probable polygalacturonase-like [Glycine max]%3B IPR000743 (Glycoside hydrolase%2C family 28)%2C IPR011050 (Pectin lyase fold/virulence factor)%3B GO:0004650 (polygalacturonase activity)%2C GO:0005975 (carbohydrate metabolic process)
Up	Aradu.P7M2S	probable polygalacturonase-like [Glycine max]%3B IPR000743 (Glycoside hydrolase%2C family 28)%2C IPR011050 (Pectin lyase fold/virulence factor)%3B GO:0004650 (polygalacturonase activity)%2C GO:0005975 (carbohydrate metabolic process)
Up	Aradu.668QS	probable rhamnose biosynthetic enzyme 1-like isoform X2 [Glycine max]%3B IPR001509 (NAD-dependent epimerase/dehydratase)%2C IPR016040 (NAD(P)-binding domain)%3B GO:0003824 (catalytic activity)%2C GO:0044237 (cellular metabolic process)%2C GO:0050662 (coenzyme binding)
Down	Aradu.GXA0E	probable sugar phosphate/phosphate translocator [Glycine max]%3B IPR004853 (Triose-phosphate transporter domain)
Down	Aradu.Z5BX3	probable WRKY transcription factor 48 [Glycine max]%3B IPR003657 (DNA-binding WRKY)%3B GO:0003700 (sequence-specific DNA binding transcription factor activity)%2C GO:0043565 (sequence-specific DNA binding)
Down	Aradu.S9TS8	probable WRKY transcription factor 49-like [Glycine max]%3B IPR003657 (DNA-binding WRKY)%3B GO:0003700 (sequence-specific DNA binding transcription factor activity)%2C GO:0043565 (sequence-specific DNA binding)
Down	Aradu.B1KKT	probable WRKY transcription factor 72-like [Glycine max]%3B IPR003657 (DNA-binding WRKY)%3B GO:0003700 (sequence-specific DNA binding transcription factor activity)%2C GO:0043565 (sequence-specific DNA binding)
Down	Aradu.9TG4T	probable xyloglucan glycosyltransferase 12-like [Glycine max]
Up	Aradu.P6GL4	probable xyloglucan glycosyltransferase 5-like [Glycine max]
Up	Araip.66GM8	programmed cell death protein 4-like isoform 1 [Glycine max]
Down	Aradu.N0QH3	prohibitin 3%3B IPR001107 (Band 7 protein)%3B GO:0016020 (membrane)
Down	Aradu.35Z4P	proline dehydrogenase%3B IPR015659 (Proline oxidase)%3B GO:0004657 (proline dehydrogenase activity)%2C GO:0006537 (glutamate biosynthetic process)%2C GO:0006562 (proline catabolic process)%2C GO:0055114 (oxidation-reduction process)
Up	Aradu.1B3IN	proline-rich protein 4-like [Glycine max]
Up	Araip.GZV1Q	prolyl 4-hydroxylase subunit alpha-1-like [Glycine max]
Down	Aradu.4SA47	protein arginine methyltransferase 10%3B IPR025799 (Protein arginine N-methyltransferase)%3B GO:0006479 (protein methylation)%2C GO:0008168 (methyltransferase activity)
Down	Aradu.W9NWV	protein Brevis radix-like 4-like isoform X2 [Glycine max]%3B IPR013591 (Brevis radix (BRX) domain)%2C IPR027988 (Transcription factor BREVIS RADIX%2C N-terminal domain)
Up	Aradu.6TH01	protein CHLOROPLAST IMPORT APPARATUS 2-like isoform 1 [Glycine max]%3B IPR010402 (CCT domain)%3B GO:0005515 (protein binding)
Up	Aradu.206DU	protein CHUP1%2C chloroplastic-like [Glycine max]
Down	Araip.913KX	protein CHUP1%2C chloroplastic-like isoform X1 [Glycine max]
Up	Aradu.379G2	protein CHUP1%2C chloroplastic-like isoform X5 [Glycine max]
Up	Aradu.HYP1B	protein CLEC16A-like isoform X1 [Glycine max]%3B IPR019155 (Uncharacterised protein family FPL)
Up	Aradu.7M1P4	protein DA1-related 1-like isoform X4 [Glycine max]%3B IPR001781 (Zinc finger%2C LIM-type)%2C IPR003903 (Ubiquitin interacting motif)%2C IPR022087 (Protein DA1 like)%3B GO:0008270 (zinc ion binding)
Down	Aradu.BH9NG	protein disulfide isomerase-like protein%2C putative%3B IPR005746 (Thioredoxin)%2C IPR012336 (Thioredoxin-like fold)%3B GO:0006662 (glycerol ether metabolic process)%2C GO:0015035 (protein disulfide oxidoreductase activity)%2C GO:0045454 (cell redox homeostasis)
Down	Aradu.8P6BN	protein disulfide isomerase-like protein%3B IPR005746 (Thioredoxin)%2C IPR005792 (Protein disulphide isomerase)%2C IPR012336 (Thioredoxin-like fold)%3B GO:0005783 (endoplasmic reticulum)%2C GO:0006662 (glycerol ether metabolic process)%2C GO:0015035 (protein disulfide oxidoreductase activity)%2C GO:0016853 (isomerase activity)%2C GO:0045454 (cell redox homeostasis)
Down	Aradu.9645F	protein disulfide isomerase-related%3B IPR005746 (Thioredoxin)%2C IPR005792 (Protein disulphide isomerase)%2C IPR012336 (Thioredoxin-like fold)%3B GO:0005783 (endoplasmic reticulum)%2C GO:0006662 (glycerol ether metabolic process)%2C GO:0015035 (protein disulfide oxidoreductase activity)%2C GO:0016853 (isomerase activity)%2C GO:0045454 (cell redox homeostasis)
Down	Aradu.7BZ8V	protein FAM91A1-like isoform X1 [Glycine max]%3B IPR028091 (FAM91%2C N-terminal domain)%2C IPR028097 (FAM91%2C C-terminal domain)
Up	Aradu.M0JAP	protein FAR1-RELATED SEQUENCE 9-like isoform X5 [Glycine max]%3B IPR007527 (Zinc finger%2C SWIM-type)%3B GO:0008270 (zinc ion binding)
Down	Aradu.JQY29	protein FLX-like 3-like isoform X1 [Glycine max]
Up	Araip.HJG5F	protein IQ-DOMAIN 1 isoform X2 [Glycine max]
Down	Aradu.7WI6W	protein IQ-DOMAIN 14-like [Glycine max]%3B IPR000048 (IQ motif%2C EF-hand binding site)%2C IPR025064 (Domain of unknown function DUF4005)%3B GO:0005515 (protein binding)
Up	Aradu.G7SDL	protein IQ-DOMAIN 14-like [Glycine max]%3B IPR025064 (Domain of unknown function DUF4005)
Down	Aradu.88IFJ	protein IQ-DOMAIN 14-like isoform X2 [Glycine max]%3B IPR000048 (IQ motif%2C EF-hand binding site)%2C IPR025064 (Domain of unknown function DUF4005)%3B GO:0005515 (protein binding)
Up	Aradu.V74N3	protein IQ-DOMAIN 1-like isoform X2 [Glycine max]%3B IPR000048 (IQ motif%2C EF-hand binding site)%2C IPR025064 (Domain of unknown function DUF4005)%2C IPR027417 (P-loop containing nucleoside triphosphate hydrolase)%3B GO:0005515 (protein binding)
Down	Araip.1J5DG	protein IQ-DOMAIN 1-like isoform X3 [Glycine max]%3B IPR000048 (IQ motif%2C EF-hand binding site)%2C IPR025064 (Domain of unknown function DUF4005)%3B GO:0005515 (protein binding)
Down	Aradu.SU56D	Protein kinase family protein%3B IPR000961 (AGC-kinase%2C C-terminal)%2C IPR011009 (Protein kinase-like domain)%2C IPR011993 (Pleckstrin homology-like domain)%3B GO:0004672 (protein kinase activity)%2C GO:0004674 (protein serine/threonine kinase activity)%2C GO:0005524 (ATP binding)%2C GO:0006468 (protein phosphorylation)
Up	Aradu.SX4F9	protein kinase family protein%3B IPR004041 (NAF domain)%2C IPR011009 (Protein kinase-like domain)%3B GO:0004672 (protein kinase activity)%2C GO:0005524 (ATP binding)%2C GO:0006468 (protein phosphorylation)%2C GO:0007165 (signal transduction)
Up	Araip.NH35S	protein kinase family protein%3B IPR009091 (Regulator of chromosome condensation 1/beta-lactamase-inhibitor protein II)%2C IPR011009 (Protein kinase-like domain)%2C IPR013320 (Concanavalin A-like lectin/glucanase%2C subgroup)%3B GO:0004672 (protein kinase activity)%2C GO:0005524 (ATP binding)%2C GO:0006468 (protein phosphorylation)
Up	Aradu.162IL	Protein kinase family protein%3B IPR011009 (Protein kinase-like domain)%2C IPR013210 (Leucine-rich repeat-containing N-terminal%2C type 2)%2C IPR013320 (Concanavalin A-like lectin/glucanase%2C subgroup)%3B GO:0004672 (protein kinase activity)%2C GO:0006468 (protein phosphorylation)
Down	Aradu.U08RL	protein kinase family protein%3B IPR011009 (Protein kinase-like domain)%2C IPR013320 (Concanavalin A-like lectin/glucanase%2C subgroup)
Down	Aradu.2XW42	Protein kinase family protein%3B IPR011009 (Protein kinase-like domain)%2C IPR013320 (Concanavalin A-like lectin/glucanase%2C subgroup)%2C IPR025287 (Wall-associated receptor kinase galacturonan-binding domain)%3B GO:0004672 (protein kinase activity)%2C GO:0005524 (ATP binding)%2C GO:0006468 (protein phosphorylation)%2C GO:0030247 (polysaccharide binding)
Down	Araip.YGJ1S	protein kinase family protein%3B IPR011009 (Protein kinase-like domain)%2C IPR013320 (Concanavalin A-like lectin/glucanase%2C subgroup)%3B GO:0004672 (protein kinase activity)%2C GO:0005524 (ATP binding)%2C GO:0006468 (protein phosphorylation)
Down	Aradu.92QJW	protein kinase family protein%3B IPR011009 (Protein kinase-like domain)%2C IPR013320 (Concanavalin A-like lectin/glucanase%2C subgroup)%3B GO:0004672 (protein kinase activity)%2C GO:0005524 (ATP binding)%2C GO:0006468 (protein phosphorylation)
Up	Araip.W0S2T	protein kinase family protein%3B IPR020636 (Calcium/calmodulin-dependent/calcium-dependent protein kinase)%3B GO:0004672 (protein kinase activity)%2C GO:0004674 (protein serine/threonine kinase activity)%2C GO:0005524 (ATP binding)%2C GO:0006468 (protein phosphorylation)
Up	Aradu.7W2Z9	protein kinase family protein%3B IPR020636 (Calcium/calmodulin-dependent/calcium-dependent protein kinase)%3B GO:0004672 (protein kinase activity)%2C GO:0005524 (ATP binding)%2C GO:0006468 (protein phosphorylation)%2C GO:0007165 (signal transduction)
Down	Aradu.Q7U61	protein kinase family protein%3B IPR024788 (Malectin-like carbohydrate-binding domain)
Down	Aradu.ZTA1W	Protein kinase superfamily protein
Down	Aradu.VK93Q	Protein kinase superfamily protein%3B IPR000270 (Phox/Bem1p)%2C IPR011009 (Protein kinase-like domain)%3B GO:0004672 (protein kinase activity)%2C GO:0004674 (protein serine/threonine kinase activity)%2C GO:0005515 (protein binding)%2C GO:0005524 (ATP binding)%2C GO:0006468 (protein phosphorylation)
Down	Araip.WH0QM	Protein kinase superfamily protein%3B IPR000858 (S-locus glycoprotein)%2C IPR001480 (Bulb-type lectin domain)%2C IPR003014 (PAN-1 domain)%2C IPR011009 (Protein kinase-like domain)%3B GO:0004672 (protein kinase activity)%2C GO:0006468 (protein phosphorylation)%2C GO:0048544 (recognition of pollen)
Down	Aradu.W9HUI	Protein kinase superfamily protein%3B IPR001611 (Leucine-rich repeat)%2C IPR003591 (Leucine-rich repeat%2C typical subtype)%2C IPR011009 (Protein kinase-like domain)%2C IPR013210 (Leucine-rich repeat-containing N-terminal%2C type 2)%3B GO:0004672 (protein kinase activity)%2C GO:0005515 (protein binding)%2C GO:0006468 (protein phosphorylation)
Down	Araip.AJY3K	Protein kinase superfamily protein%3B IPR008985 (Concanavalin A-like lectin/glucanases superfamily)%2C IPR011009 (Protein kinase-like domain)%2C IPR013320 (Concanavalin A-like lectin/glucanase%2C subgroup)%3B GO:0004672 (protein kinase activity)%2C GO:0005524 (ATP binding)%2C GO:0006468 (protein phosphorylation)%2C GO:0030246 (carbohydrate binding)
Down	Aradu.MCD22	Protein kinase superfamily protein%3B IPR009091 (Regulator of chromosome condensation 1/beta-lactamase-inhibitor protein II)%2C IPR011009 (Protein kinase-like domain)%2C IPR013320 (Concanavalin A-like lectin/glucanase%2C subgroup)%3B GO:0004672 (protein kinase activity)%2C GO:0006468 (protein phosphorylation)
Down	Aradu.D03W8	Protein kinase superfamily protein%3B IPR011009 (Protein kinase-like domain)%2C IPR011992 (EF-hand domain pair)%3B GO:0004672 (protein kinase activity)%2C GO:0005509 (calcium ion binding)%2C GO:0005524 (ATP binding)%2C GO:0006468 (protein phosphorylation)
Down	Araip.1897A	Protein kinase superfamily protein%3B IPR011009 (Protein kinase-like domain)%2C IPR011992 (EF-hand domain pair)%3B GO:0004672 (protein kinase activity)%2C GO:0005509 (calcium ion binding)%2C GO:0005524 (ATP binding)%2C GO:0006468 (protein phosphorylation)
Up	Aradu.EW7BI	Protein kinase superfamily protein%3B IPR011009 (Protein kinase-like domain)%2C IPR013320 (Concanavalin A-like lectin/glucanase%2C subgroup)%2C IPR014729 (Rossmann-like alpha/beta/alpha sandwich fold)%3B GO:0004672 (protein kinase activity)%2C GO:0006468 (protein phosphorylation)
Down	Aradu.J623L	Protein kinase superfamily protein%3B IPR011009 (Protein kinase-like domain)%2C IPR013320 (Concanavalin A-like lectin/glucanase%2C subgroup)%2C IPR014729 (Rossmann-like alpha/beta/alpha sandwich fold)%3B GO:0004672 (protein kinase activity)%2C GO:0006468 (protein phosphorylation)
Down	Aradu.E62NC	Protein kinase superfamily protein%3B IPR011009 (Protein kinase-like domain)%2C IPR013320 (Concanavalin A-like lectin/glucanase%2C subgroup)%3B GO:0004672 (protein kinase activity)%2C GO:0005524 (ATP binding)%2C GO:0006468 (protein phosphorylation)
Down	Aradu.65T0K	Protein kinase superfamily protein%3B IPR011009 (Protein kinase-like domain)%2C IPR013320 (Concanavalin A-like lectin/glucanase%2C subgroup)%3B GO:0004672 (protein kinase activity)%2C GO:0005524 (ATP binding)%2C GO:0006468 (protein phosphorylation)
Down	Araip.V7FAZ	Protein kinase superfamily protein%3B IPR011009 (Protein kinase-like domain)%2C IPR013320 (Concanavalin A-like lectin/glucanase%2C subgroup)%3B GO:0004672 (protein kinase activity)%2C GO:0005524 (ATP binding)%2C GO:0006468 (protein phosphorylation)
Down	Araip.S2TUB	Protein kinase superfamily protein%3B IPR011009 (Protein kinase-like domain)%2C IPR013320 (Concanavalin A-like lectin/glucanase%2C subgroup)%3B GO:0004672 (protein kinase activity)%2C GO:0005524 (ATP binding)%2C GO:0006468 (protein phosphorylation)
Down	Araip.BG1TQ	Protein kinase superfamily protein%3B IPR011009 (Protein kinase-like domain)%2C IPR013320 (Concanavalin A-like lectin/glucanase%2C subgroup)%3B GO:0004672 (protein kinase activity)%2C GO:0005524 (ATP binding)%2C GO:0006468 (protein phosphorylation)
Down	Aradu.8EB7C	Protein kinase superfamily protein%3B IPR011009 (Protein kinase-like domain)%2C IPR013320 (Concanavalin A-like lectin/glucanase%2C subgroup)%3B GO:0004672 (protein kinase activity)%2C GO:0005524 (ATP binding)%2C GO:0006468 (protein phosphorylation)
Up	Aradu.DAC70	Protein kinase superfamily protein%3B IPR011009 (Protein kinase-like domain)%2C IPR013320 (Concanavalin A-like lectin/glucanase%2C subgroup)%3B GO:0004672 (protein kinase activity)%2C GO:0005524 (ATP binding)%2C GO:0006468 (protein phosphorylation)
Down	Aradu.L4D0H	Protein kinase superfamily protein%3B IPR011009 (Protein kinase-like domain)%2C IPR013320 (Concanavalin A-like lectin/glucanase%2C subgroup)%3B GO:0004672 (protein kinase activity)%2C GO:0005524 (ATP binding)%2C GO:0006468 (protein phosphorylation)
Up	Aradu.Q21Y2	Protein kinase superfamily protein%3B IPR011009 (Protein kinase-like domain)%2C IPR013320 (Concanavalin A-like lectin/glucanase%2C subgroup)%3B GO:0004672 (protein kinase activity)%2C GO:0006468 (protein phosphorylation)
Down	Araip.A85AJ	Protein kinase superfamily protein%3B IPR011009 (Protein kinase-like domain)%2C IPR016253 (Integrin-linked protein kinase)%2C IPR028324 (Serine/threonine-protein kinase CTR1)%3B GO:0004672 (protein kinase activity)%2C GO:0004674 (protein serine/threonine kinase activity)%2C GO:0005515 (protein binding)%2C GO:0005524 (ATP binding)%2C GO:0006468 (protein phosphorylation)%2C GO:0009966 (regulation o…
Down	Aradu.31VER	Protein kinase superfamily protein%3B IPR011009 (Protein kinase-like domain)%2C IPR016253 (Integrin-linked protein kinase)%2C IPR028324 (Serine/threonine-protein kinase CTR1)%3B GO:0004672 (protein kinase activity)%2C GO:0004674 (protein serine/threonine kinase activity)%2C GO:0005515 (protein binding)%2C GO:0005524 (ATP binding)%2C GO:0006468 (protein phosphorylation)%2C GO:0009966 (regulation o…
Up	Aradu.516WS	Protein kinase superfamily protein%3B IPR011009 (Protein kinase-like domain)%2C IPR016477 (Fructosamine/Ketosamine-3-kinase)
Down	Aradu.WZ2TS	Protein kinase superfamily protein%3B IPR011009 (Protein kinase-like domain)%2C IPR028324 (Serine/threonine-protein kinase CTR1)%3B GO:0004672 (protein kinase activity)%2C GO:0005524 (ATP binding)%2C GO:0006468 (protein phosphorylation)
Down	Aradu.48GRH	Protein kinase superfamily protein%3B IPR011009 (Protein kinase-like domain)%3B GO:0004672 (protein kinase activity)%2C GO:0004674 (protein serine/threonine kinase activity)%2C GO:0005524 (ATP binding)%2C GO:0006468 (protein phosphorylation)
Down	Araip.PGQ7W	Protein kinase superfamily protein%3B IPR011009 (Protein kinase-like domain)%3B GO:0004672 (protein kinase activity)%2C GO:0005524 (ATP binding)%2C GO:0006468 (protein phosphorylation)
Down	Araip.KWN7Q	Protein kinase superfamily protein%3B IPR011009 (Protein kinase-like domain)%3B GO:0004672 (protein kinase activity)%2C GO:0005524 (ATP binding)%2C GO:0006468 (protein phosphorylation)
Up	Araip.ZEH4R	Protein kinase superfamily protein%3B IPR011009 (Protein kinase-like domain)%3B GO:0004672 (protein kinase activity)%2C GO:0005524 (ATP binding)%2C GO:0006468 (protein phosphorylation)
Down	Aradu.JWM4N	Protein kinase superfamily protein%3B IPR011009 (Protein kinase-like domain)%3B GO:0004672 (protein kinase activity)%2C GO:0005524 (ATP binding)%2C GO:0006468 (protein phosphorylation)
Up	Aradu.NIR19	Protein kinase superfamily protein%3B IPR011009 (Protein kinase-like domain)%3B GO:0004672 (protein kinase activity)%2C GO:0005524 (ATP binding)%2C GO:0006468 (protein phosphorylation)
Up	Aradu.2717A	Protein kinase superfamily protein%3B IPR011009 (Protein kinase-like domain)%3B GO:0004672 (protein kinase activity)%2C GO:0005524 (ATP binding)%2C GO:0006468 (protein phosphorylation)
Down	Aradu.A68MB	Protein kinase superfamily protein%3B IPR011009 (Protein kinase-like domain)%3B GO:0004672 (protein kinase activity)%2C GO:0005524 (ATP binding)%2C GO:0006468 (protein phosphorylation)
Up	Aradu.Q0IL1	Protein kinase superfamily protein%3B IPR011009 (Protein kinase-like domain)%3B GO:0004672 (protein kinase activity)%2C GO:0005524 (ATP binding)%2C GO:0006468 (protein phosphorylation)
Down	Aradu.NJQ5G	Protein kinase superfamily protein%3B IPR011009 (Protein kinase-like domain)%3B GO:0004672 (protein kinase activity)%2C GO:0005524 (ATP binding)%2C GO:0006468 (protein phosphorylation)
Up	Aradu.0SM3T	Protein kinase superfamily protein%3B IPR011009 (Protein kinase-like domain)%3B GO:0004672 (protein kinase activity)%2C GO:0005524 (ATP binding)%2C GO:0006468 (protein phosphorylation)
Down	Aradu.WX32R	Protein kinase superfamily protein%3B IPR011009 (Protein kinase-like domain)%3B GO:0004672 (protein kinase activity)%2C GO:0005524 (ATP binding)%2C GO:0006468 (protein phosphorylation)
Down	Aradu.UP9E4	Protein kinase superfamily protein%3B IPR011009 (Protein kinase-like domain)%3B GO:0004672 (protein kinase activity)%2C GO:0005524 (ATP binding)%2C GO:0006468 (protein phosphorylation)
Up	Aradu.W3H15	Protein kinase superfamily protein%3B IPR011009 (Protein kinase-like domain)%3B GO:0004672 (protein kinase activity)%2C GO:0005524 (ATP binding)%2C GO:0006468 (protein phosphorylation)
Down	Aradu.BW225	Protein kinase superfamily protein%3B IPR011009 (Protein kinase-like domain)%3B GO:0004672 (protein kinase activity)%2C GO:0005524 (ATP binding)%2C GO:0006468 (protein phosphorylation)
Up	Aradu.E1ZU5	Protein kinase superfamily protein%3B IPR011009 (Protein kinase-like domain)%3B GO:0004672 (protein kinase activity)%2C GO:0005524 (ATP binding)%2C GO:0006468 (protein phosphorylation)
Down	Aradu.Z7Y39	Protein kinase superfamily protein%3B IPR011009 (Protein kinase-like domain)%3B GO:0004672 (protein kinase activity)%2C GO:0005524 (ATP binding)%2C GO:0006468 (protein phosphorylation)
Down	Aradu.81MY4	Protein kinase superfamily protein%3B IPR011009 (Protein kinase-like domain)%3B GO:0004672 (protein kinase activity)%2C GO:0005524 (ATP binding)%2C GO:0006468 (protein phosphorylation)
Down	Aradu.G7DFD	Protein kinase superfamily protein%3B IPR011009 (Protein kinase-like domain)%3B GO:0004672 (protein kinase activity)%2C GO:0005524 (ATP binding)%2C GO:0006468 (protein phosphorylation)
Down	Aradu.I31PQ	Protein kinase superfamily protein%3B IPR011009 (Protein kinase-like domain)%3B GO:0004672 (protein kinase activity)%2C GO:0005524 (ATP binding)%2C GO:0006468 (protein phosphorylation)
Down	Aradu.ZC9DU	Protein kinase superfamily protein%3B IPR011009 (Protein kinase-like domain)%3B GO:0004672 (protein kinase activity)%2C GO:0005524 (ATP binding)%2C GO:0006468 (protein phosphorylation)
Down	Aradu.82M1H	Protein kinase superfamily protein%3B IPR011009 (Protein kinase-like domain)%3B GO:0004672 (protein kinase activity)%2C GO:0006468 (protein phosphorylation)
Down	Aradu.AE3JB	Protein kinase superfamily protein%3B IPR024788 (Malectin-like carbohydrate-binding domain)
Up	Araip.VQN1P	protein LHY isoform X9 [Glycine max]%3B IPR001878 (Zinc finger%2C CCHC-type)%2C IPR012878 (Protein of unknown function DUF1680)%3B GO:0003676 (nucleic acid binding)%2C GO:0008270 (zinc ion binding)
Down	Aradu.U1N83	protein LURP-one-related 11-like [Glycine max]%3B IPR025659 (Tubby C-terminal-like domain)
Up	Araip.M9BAR	protein LURP-one-related 15-like [Glycine max]%3B IPR025659 (Tubby C-terminal-like domain)
Down	Aradu.S166E	protein LURP-one-related 15-like [Glycine max]%3B IPR025659 (Tubby C-terminal-like domain)
Down	Aradu.D2ZN6	protein MKS1-like [Glycine max]%3B IPR008889 (VQ)
Down	Aradu.7K2S3	protein NLP4-like isoform X6 [Glycine max]%3B IPR000270 (Phox/Bem1p)%2C IPR003035 (RWP-RK domain)%3B GO:0005515 (protein binding)
Down	Aradu.R9QRU	Protein of unknown function (DUF1218)%3B IPR009606 (Protein of unknown function DUF1218)
Up	Aradu.U4IDZ	Protein of unknown function (DUF179)%3B IPR003774 (Protein of unknown function UPF0301)
Up	Aradu.10YCG	Protein of unknown function (DUF179)%3B IPR003774 (Protein of unknown function UPF0301)
Up	Aradu.G00JS	Protein of unknown function (DUF581)%3B IPR007650 (Protein of unknown function DUF581)
Down	Aradu.S3QGS	Protein of unknown function (DUF679)%3B IPR007770 (Protein of unknown function DUF679)
Up	Aradu.PVE8C	Protein of unknown function (DUF789)%3B IPR008507 (Protein of unknown function DUF789)
Up	Aradu.78XN5	Protein of unknown function (DUF789)%3B IPR008507 (Protein of unknown function DUF789)
Up	Aradu.J1G4Q	Protein of unknown function (DUF819)%3B IPR008537 (Protein of unknown function DUF819)
Up	Araip.G7S2L	Protein of unknown function%2C DUF538%3B IPR007493 (Protein of unknown function DUF538)
Up	Aradu.ZFX0Z	Protein of unknown function%2C DUF538%3B IPR007493 (Protein of unknown function DUF538)
Down	Aradu.7M0WV	Protein of unknown function%2C DUF642%3B IPR006946 (Protein of unknown function DUF642)%2C IPR008979 (Galactose-binding domain-like)
Down	Aradu.CT5EJ	Protein phosphatase 2C family protein%3B IPR001932 (Protein phosphatase 2C (PP2C)-like domain)%2C IPR015655 (Protein phosphatase 2C)%3B GO:0003824 (catalytic activity)
Up	Araip.M5ZXN	Protein phosphatase 2C family protein%3B IPR001932 (Protein phosphatase 2C (PP2C)-like domain)%2C IPR015655 (Protein phosphatase 2C)%3B GO:0003824 (catalytic activity)
Down	Aradu.EIY0H	Protein phosphatase 2C family protein%3B IPR001932 (Protein phosphatase 2C (PP2C)-like domain)%2C IPR015655 (Protein phosphatase 2C)%3B GO:0003824 (catalytic activity)
Down	Aradu.289R9	Protein phosphatase 2C family protein%3B IPR001932 (Protein phosphatase 2C (PP2C)-like domain)%2C IPR015655 (Protein phosphatase 2C)%3B GO:0003824 (catalytic activity)
Up	Aradu.VZ4PC	Protein phosphatase 2C family protein%3B IPR001932 (Protein phosphatase 2C (PP2C)-like domain)%2C IPR015655 (Protein phosphatase 2C)%3B GO:0003824 (catalytic activity)
Up	Aradu.X74QT	Protein phosphatase 2C family protein%3B IPR001932 (Protein phosphatase 2C (PP2C)-like domain)%2C IPR015655 (Protein phosphatase 2C)%3B GO:0003824 (catalytic activity)
Down	Aradu.DB4LT	Protein phosphatase 2C family protein%3B IPR001932 (Protein phosphatase 2C (PP2C)-like domain)%2C IPR015655 (Protein phosphatase 2C)%3B GO:0003824 (catalytic activity)
Up	Aradu.DPR5V	Protein phosphatase 2C family protein%3B IPR001932 (Protein phosphatase 2C (PP2C)-like domain)%2C IPR015655 (Protein phosphatase 2C)%3B GO:0003824 (catalytic activity)
Up	Aradu.BLA9Y	Protein phosphatase 2C family protein%3B IPR001932 (Protein phosphatase 2C (PP2C)-like domain)%2C IPR015655 (Protein phosphatase 2C)%3B GO:0003824 (catalytic activity)
Up	Aradu.0EZ1S	Protein phosphatase 2C family protein%3B IPR001932 (Protein phosphatase 2C (PP2C)-like domain)%3B GO:0003824 (catalytic activity)
Up	Araip.PH99V	protein PLASTID MOVEMENT IMPAIRED 2-like isoform X1 [Glycine max]%3B IPR008545 (WEB family)
Up	Aradu.HB26F	protein PLASTID MOVEMENT IMPAIRED 2-like isoform X3 [Glycine max]
Up	Aradu.XA0CI	protein SPA1-RELATED 3-like isoform X1 [Glycine max]%3B IPR011009 (Protein kinase-like domain)%2C IPR015943 (WD40/YVTN repeat-like-containing domain)%2C IPR020472 (G-protein beta WD-40 repeat)%3B GO:0004672 (protein kinase activity)%2C GO:0005515 (protein binding)%2C GO:0005524 (ATP binding)%2C GO:0006468 (protein phosphorylation)
Up	Aradu.WU8B9	protein THYLAKOID FORMATION1%2C chloroplastic-like [Glycine max]%3B IPR017499 (Photosystem II Psp29%2C biogenesis)%3B GO:0009523 (photosystem II)%2C GO:0010027 (thylakoid membrane organization)%2C GO:0015979 (photosynthesis)
Up	Aradu.H9EEY	protein TIC 62%2C chloroplastic-like isoform X2 [Glycine max]%3B IPR016040 (NAD(P)-binding domain)
Up	Aradu.I9ZH8	protein TIC 62%2C chloroplastic-like isoform X3 [Glycine max]%3B IPR014710 (RmlC-like jelly roll fold)
Down	Aradu.61JFB	protein TIFY 6B-like isoform X1 [Glycine max]%3B IPR010399 (Tify)%2C IPR018467 (CO/COL/TOC1%2C conserved site)
Down	Aradu.JK5YQ	protein TPLATE-like [Glycine max]%3B IPR016024 (Armadillo-type fold)%3B GO:0005488 (binding)
Down	Aradu.2Z8XP	protein TPX2-like isoform X2 [Glycine max]%3B IPR009675 (TPX2)%2C IPR027329 (TPX2%2C C-terminal domain)%2C IPR027330 (TPX2 central domain)%3B GO:0005819 (spindle)%2C GO:0005874 (microtubule)%2C GO:0007067 (mitosis)
Down	Aradu.L1474	protein TPX2-like isoform X2 [Glycine max]%3B IPR009675 (TPX2)%2C IPR027329 (TPX2%2C C-terminal domain)%2C IPR027330 (TPX2 central domain)%3B GO:0005819 (spindle)%2C GO:0005874 (microtubule)%2C GO:0007067 (mitosis)
Down	Araip.CU5DC	protein TRANSPARENT TESTA 1-like [Glycine max]
Down	Aradu.37JVZ	protein TRANSPARENT TESTA 1-like [Glycine max]%3B IPR013087 (Zinc finger C2H2-type/integrase DNA-binding domain)%3B GO:0003676 (nucleic acid binding)%2C GO:0046872 (metal ion binding)
Down	Araip.GD3XI	protein UPSTREAM OF FLC-like [Glycine max]%3B IPR010369 (Protein of unknown function DUF966)
Up	Aradu.R77ZC	protein YLS7-like [Glycine max]%3B IPR005935 (Diphosphomevalonate decarboxylase)%2C IPR025846 (PMR5 N-terminal domain)%2C IPR026057 (PC-Esterase)%3B GO:0004163 (diphosphomevalonate decarboxylase activity)%2C GO:0005524 (ATP binding)%2C GO:0008299 (isoprenoid biosynthetic process)
Down	Araip.AUQ67	protein YLS7-like [Glycine max]%3B IPR025846 (PMR5 N-terminal domain)%2C IPR026057 (PC-Esterase)
Down	Araip.R1LLI	protein YLS7-like [Glycine max]%3B IPR025846 (PMR5 N-terminal domain)%2C IPR026057 (PC-Esterase)
Down	Aradu.84U8V	protein YLS7-like [Glycine max]%3B IPR025846 (PMR5 N-terminal domain)%2C IPR026057 (PC-Esterase)
Down	Aradu.U4VQA	protein YLS7-like [Glycine max]%3B IPR025846 (PMR5 N-terminal domain)%2C IPR026057 (PC-Esterase)
Down	Aradu.92K40	protein YLS7-like [Glycine max]%3B IPR025846 (PMR5 N-terminal domain)%2C IPR026057 (PC-Esterase)
Up	Aradu.B5D0F	protein YLS7-like [Glycine max]%3B IPR025846 (PMR5 N-terminal domain)%2C IPR026057 (PC-Esterase)
Down	Aradu.CX56M	protein YLS7-like [Glycine max]%3B IPR026057 (PC-Esterase)
Down	Aradu.RU8HS	protein YLS9 [Glycine max]%3B IPR004864 (Late embryogenesis abundant protein%2C LEA-14)
Up	Aradu.ANI5N	protochlorophyllide oxidoreductase A%3B IPR002347 (Glucose/ribitol dehydrogenase)%3B GO:0008152 (metabolic process)%2C GO:0016491 (oxidoreductase activity)%2C GO:0016630 (protochlorophyllide reductase activity)%2C GO:0055114 (oxidation-reduction process)
Up	Aradu.UB39J	protochlorophyllide oxidoreductase A%3B IPR002347 (Glucose/ribitol dehydrogenase)%3B GO:0008152 (metabolic process)%2C GO:0016491 (oxidoreductase activity)%2C GO:0016630 (protochlorophyllide reductase activity)%2C GO:0055114 (oxidation-reduction process)
Up	Aradu.Q47B4	proton gradient regulation 5
Up	Aradu.UA815	protoporphyrin IX magnesium chelatase subunit ChlD%3B IPR013210 (Leucine-rich repeat-containing N-terminal%2C type 2)
Up	Aradu.AZ3MG	PsbB mRNA maturation factor Mbb1%3B IPR011990 (Tetratricopeptide-like helical)%3B GO:0005515 (protein binding)%2C GO:0005622 (intracellular)%2C GO:0006396 (RNA processing)
Up	Araip.Y957G	Pseudouridine synthase family protein%3B IPR001406 (Pseudouridine synthase I%2C TruA)%2C IPR020103 (Pseudouridine synthase%2C catalytic domain)%3B GO:0001522 (pseudouridine synthesis)%2C GO:0003723 (RNA binding)%2C GO:0009451 (RNA modification)%2C GO:0009982 (pseudouridine synthase activity)
Up	Aradu.5DD09	pterin-4-alpha-carbinolamine dehydratase%3B IPR001533 (Transcriptional coactivator/pterin dehydratase)%3B GO:0006729 (tetrahydrobiopterin biosynthetic process)%2C GO:0008124 (4-alpha-hydroxytetrahydrobiopterin dehydratase activity)
Down	Araip.AY7YU	pumilio-family RNA-binding repeatprotein%3B IPR003854 (Gibberellin regulated protein)%2C IPR016024 (Armadillo-type fold)%3B GO:0003723 (RNA binding)%2C GO:0005488 (binding)
Up	Aradu.LZ2RQ	purine permease 10%3B IPR004853 (Triose-phosphate transporter domain)
Down	Aradu.31E79	purine permease 4%3B IPR000620 (Drug/metabolite transporter)%2C IPR004853 (Triose-phosphate transporter domain)%3B GO:0016020 (membrane)
Up	Aradu.DL7C8	purine permease 5%3B IPR000620 (Drug/metabolite transporter)%2C IPR004853 (Triose-phosphate transporter domain)%3B GO:0016020 (membrane)
Down	Aradu.5R97S	purple acid phosphatase 15%3B IPR004843 (Calcineurin-like phosphoesterase domain%2C apaH type)%2C IPR008963 (Purple acid phosphatase-like%2C N-terminal)%2C IPR025733 (Iron/zinc purple acid phosphatase-like C-terminal domain)%3B GO:0003993 (acid phosphatase activity)%2C GO:0016787 (hydrolase activity)%2C GO:0046872 (metal ion binding)
Up	Araip.SV16A	purple acid phosphatase 29%3B IPR004843 (Calcineurin-like phosphoesterase domain%2C apaH type)%3B GO:0016787 (hydrolase activity)
Up	Aradu.6PG6R	purple acid phosphatase 3%3B IPR004843 (Calcineurin-like phosphoesterase domain%2C apaH type)%2C IPR024927 (Acid phosphatase%2C type 5)%3B GO:0003993 (acid phosphatase activity)%2C GO:0016787 (hydrolase activity)
Up	Aradu.54QRR	purple acid phosphatase 7
Down	Aradu.V8TYV	putative DNA-binding protein ESCAROLA-like [Glycine max]%3B IPR014476 (Predicted AT-hook DNA-binding)
Down	Aradu.88CF0	putative DNA-binding protein ESCAROLA-like [Glycine max]%3B IPR014476 (Predicted AT-hook DNA-binding)
Down	Aradu.WK5VL	putative DNA-binding protein ESCAROLA-like [Glycine max]%3B IPR014476 (Predicted AT-hook DNA-binding)
Down	Aradu.JBM4A	putative E3 ubiquitin-protein ligase LIN-1-like isoform X3 [Glycine max]%3B IPR015943 (WD40/YVTN repeat-like-containing domain)%2C IPR016024 (Armadillo-type fold)%3B GO:0005488 (binding)%2C GO:0005515 (protein binding)
Down	Aradu.T35QD	putative ferric-chelate reductase 1-like [Glycine max]%3B IPR004877 (Cytochrome b561%2C eukaryote)%3B GO:0016021 (integral component of membrane)
Down	Aradu.1XJ5E	putative glucuronosyltransferase PGSIP8-like [Glycine max]%3B IPR002495 (Glycosyl transferase%2C family 8)
Up	Aradu.EZY28	putative indole-3-acetic acid-amido synthetase GH3.9%3B IPR004993 (GH3 auxin-responsive promoter)
Up	Aradu.A6CQ2	putative nuclear matrix constituent protein 1-like protein-like isoform X3 [Glycine max]
Down	Aradu.AJ4ZH	putative nuclease HARBI1-like [Glycine max]%3B IPR013159 (Chromosomal replication initiator%2C DnaA C-terminal)%2C IPR026103 (Harbinger transposase-derived nuclease%2C animal)%2C IPR027806 (Harbinger transposase-derived nuclease domain)%3B GO:0005524 (ATP binding)%2C GO:0006270 (DNA replication initiation)%2C GO:0006275 (regulation of DNA replication)%2C GO:0043565 (sequence-specific DNA binding)
Down	Aradu.W8L28	pyrroline-5-carboxylate reductase%3B IPR000304 (Pyrroline-5-carboxylate reductase)%2C IPR008927 (6-phosphogluconate dehydrogenase%2C C-terminal-like)%3B GO:0004735 (pyrroline-5-carboxylate reductase activity)%2C GO:0006561 (proline biosynthetic process)%2C GO:0055114 (oxidation-reduction process)
Down	Aradu.SIK9X	pyruvate decarboxylase-2%3B IPR011766 (Thiamine pyrophosphate enzyme%2C C-terminal TPP-binding)%2C IPR012110 (Thiamine pyrophosphate (TPP)-dependent enzyme)%3B GO:0000287 (magnesium ion binding)%2C GO:0003824 (catalytic activity)%2C GO:0030976 (thiamine pyrophosphate binding)
Down	Aradu.9Z0KG	pyruvate decarboxylase-2%3B IPR011766 (Thiamine pyrophosphate enzyme%2C C-terminal TPP-binding)%2C IPR012110 (Thiamine pyrophosphate (TPP)-dependent enzyme)%3B GO:0000287 (magnesium ion binding)%2C GO:0003824 (catalytic activity)%2C GO:0030976 (thiamine pyrophosphate binding)
Up	Aradu.WR10B	pyruvate dehydrogenase E1 beta%3B IPR005475 (Transketolase-like%2C pyrimidine-binding domain)%2C IPR005476 (Transketolase%2C C-terminal)%2C IPR009014 (Transketolase%2C C-terminal/Pyruvate-ferredoxin oxidoreductase%2C domain II)%3B GO:0003824 (catalytic activity)%2C GO:0008152 (metabolic process)
Up	Araip.SR8J1	pyruvate dehydrogenase E1 component%2C alpha subunit%3B IPR001017 (Dehydrogenase%2C E1 component)%3B GO:0008152 (metabolic process)
Up	Aradu.ZD7QJ	pyruvate dehydrogenase kinase%3B IPR003594 (Histidine kinase-like ATPase%2C ATP-binding domain)%2C IPR004358 (Signal transduction histidine kinase-related protein%2C C-terminal)%2C IPR018955 (Branched-chain alpha-ketoacid dehydrogenase kinase/Pyruvate dehydrogenase kinase%2C N-terminal)%3B GO:0005524 (ATP binding)%2C GO:0016310 (phosphorylation)
Up	Araip.T0P1U	pyruvate dehydrogenase kinase%3B IPR003594 (Histidine kinase-like ATPase%2C ATP-binding domain)%2C IPR004358 (Signal transduction histidine kinase-related protein%2C C-terminal)%2C IPR018955 (Branched-chain alpha-ketoacid dehydrogenase kinase/Pyruvate dehydrogenase kinase%2C N-terminal)%3B GO:0005524 (ATP binding)%2C GO:0016310 (phosphorylation)
Down	Aradu.8IN6N	Pyruvate kinase family protein%3B IPR001697 (Pyruvate kinase)%3B GO:0000287 (magnesium ion binding)%2C GO:0003824 (catalytic activity)%2C GO:0004743 (pyruvate kinase activity)%2C GO:0006096 (glycolysis)%2C GO:0030955 (potassium ion binding)
Up	Aradu.X1LTA	Pyruvate kinase family protein%3B IPR001697 (Pyruvate kinase)%3B GO:0000287 (magnesium ion binding)%2C GO:0003824 (catalytic activity)%2C GO:0004743 (pyruvate kinase activity)%2C GO:0006096 (glycolysis)%2C GO:0030955 (potassium ion binding)
Down	Aradu.49UB9	Pyruvate kinase family protein%3B IPR001697 (Pyruvate kinase)%3B GO:0000287 (magnesium ion binding)%2C GO:0003824 (catalytic activity)%2C GO:0004743 (pyruvate kinase activity)%2C GO:0006096 (glycolysis)%2C GO:0030955 (potassium ion binding)
Down	Aradu.UM7TW	quinolinate synthase%3B IPR003473 (Quinolinate synthetase A)%2C IPR003808 (Fe-S metabolism associated domain%2C SufE-like)%3B GO:0008987 (quinolinate synthetase A activity)%2C GO:0009435 (NAD biosynthetic process)
Down	Aradu.BP4YL	QWRF motif-containing protein 2-like isoform X1 [Glycine max]%3B IPR007573 (Protein of unknown function DUF566)
Down	Aradu.YZB03	QWRF motif-containing protein 8-like isoform X1 [Glycine max]
Down	Aradu.652K4	RAN GTPase activating protein 1%3B IPR003590 (Leucine-rich repeat%2C ribonuclease inhibitor subtype)%2C IPR025265 (WPP domain)
Up	Aradu.PC97C	receptor kinase 1%3B IPR011009 (Protein kinase-like domain)%2C IPR013320 (Concanavalin A-like lectin/glucanase%2C subgroup)%3B GO:0004672 (protein kinase activity)%2C GO:0005524 (ATP binding)%2C GO:0006468 (protein phosphorylation)
Up	Aradu.9D33T	receptor kinase 2%3B IPR000858 (S-locus glycoprotein)%2C IPR003609 (Apple-like)%2C IPR011009 (Protein kinase-like domain)%2C IPR013320 (Concanavalin A-like lectin/glucanase%2C subgroup)%3B GO:0004672 (protein kinase activity)%2C GO:0005524 (ATP binding)%2C GO:0006468 (protein phosphorylation)%2C GO:0048544 (recognition of pollen)
Down	Aradu.4CC43	receptor kinase 2%3B IPR002902 (Gnk2-homologous domain)%2C IPR011009 (Protein kinase-like domain)%2C IPR013320 (Concanavalin A-like lectin/glucanase%2C subgroup)%3B GO:0004672 (protein kinase activity)%2C GO:0005524 (ATP binding)%2C GO:0006468 (protein phosphorylation)
Down	Aradu.4WF4L	receptor kinase 2%3B IPR008985 (Concanavalin A-like lectin/glucanases superfamily)%2C IPR011009 (Protein kinase-like domain)%2C IPR013320 (Concanavalin A-like lectin/glucanase%2C subgroup)%3B GO:0004672 (protein kinase activity)%2C GO:0005524 (ATP binding)%2C GO:0006468 (protein phosphorylation)%2C GO:0030246 (carbohydrate binding)
Down	Aradu.NKW3P	receptor kinase 2%3B IPR011009 (Protein kinase-like domain)%2C IPR014743 (Chloride channel%2C core)%3B GO:0005216 (ion channel activity)%2C GO:0055085 (transmembrane transport)
Up	Araip.G8QRV	receptor kinase 3%3B IPR000858 (S-locus glycoprotein)%2C IPR011009 (Protein kinase-like domain)%2C IPR013227 (PAN-2 domain)%2C IPR013320 (Concanavalin A-like lectin/glucanase%2C subgroup)%3B GO:0004672 (protein kinase activity)%2C GO:0005524 (ATP binding)%2C GO:0006468 (protein phosphorylation)%2C GO:0048544 (recognition of pollen)
Up	Araip.8XS0S	receptor kinase 3%3B IPR002902 (Gnk2-homologous domain)%2C IPR011009 (Protein kinase-like domain)%2C IPR013320 (Concanavalin A-like lectin/glucanase%2C subgroup)%3B GO:0004672 (protein kinase activity)%2C GO:0005524 (ATP binding)%2C GO:0006468 (protein phosphorylation)
Up	Aradu.E5HJY	receptor kinase 3%3B IPR011009 (Protein kinase-like domain)%2C IPR013320 (Concanavalin A-like lectin/glucanase%2C subgroup)%2C IPR021720 (Malectin)%2C IPR025875 (Leucine rich repeat 4)%3B GO:0004672 (protein kinase activity)%2C GO:0005524 (ATP binding)%2C GO:0006468 (protein phosphorylation)
Down	Aradu.Z59DI	receptor serine/threonine kinase%2C putative%3B IPR000858 (S-locus glycoprotein)%2C IPR001480 (Bulb-type lectin domain)%2C IPR011009 (Protein kinase-like domain)%2C IPR013320 (Concanavalin A-like lectin/glucanase%2C subgroup)%3B GO:0004672 (protein kinase activity)%2C GO:0004674 (protein serine/threonine kinase activity)%2C GO:0005524 (ATP binding)%2C GO:0006468 (protein phosphorylation)%2C GO:00…
Down	Aradu.WT2VD	receptor-like kinase 1%3B IPR001611 (Leucine-rich repeat)%2C IPR003591 (Leucine-rich repeat%2C typical subtype)%2C IPR011009 (Protein kinase-like domain)%2C IPR013210 (Leucine-rich repeat-containing N-terminal%2C type 2)%3B GO:0004672 (protein kinase activity)%2C GO:0005515 (protein binding)%2C GO:0005524 (ATP binding)%2C GO:0006468 (protein phosphorylation)
Down	Aradu.9341P	receptor-like kinase 1%3B IPR001611 (Leucine-rich repeat)%2C IPR011009 (Protein kinase-like domain)%3B GO:0004672 (protein kinase activity)%2C GO:0005515 (protein binding)%2C GO:0006468 (protein phosphorylation)
Down	Aradu.BE6XZ	receptor-like kinase 1%3B IPR001611 (Leucine-rich repeat)%2C IPR025875 (Leucine rich repeat 4)%3B GO:0005515 (protein binding)
Down	Aradu.WQ0IG	receptor-like kinase 1%3B IPR003591 (Leucine-rich repeat%2C typical subtype)%2C IPR011009 (Protein kinase-like domain)%2C IPR013210 (Leucine-rich repeat-containing N-terminal%2C type 2)%2C IPR025875 (Leucine rich repeat 4)%3B GO:0004672 (protein kinase activity)%2C GO:0005524 (ATP binding)%2C GO:0006468 (protein phosphorylation)
Down	Aradu.6RF6E	receptor-like kinase 1%3B IPR008808 (Powdery mildew resistance protein%2C RPW8 domain)%2C IPR011009 (Protein kinase-like domain)%3B GO:0004672 (protein kinase activity)%2C GO:0005524 (ATP binding)%2C GO:0006468 (protein phosphorylation)
Down	Aradu.QL7M2	receptor-like kinase 1%3B IPR008808 (Powdery mildew resistance protein%2C RPW8 domain)%2C IPR011009 (Protein kinase-like domain)%3B GO:0004672 (protein kinase activity)%2C GO:0005524 (ATP binding)%2C GO:0006468 (protein phosphorylation)
Up	Aradu.L9M7F	receptor-like kinase 902%3B IPR001611 (Leucine-rich repeat)%2C IPR011009 (Protein kinase-like domain)%2C IPR012762 (Ubiquinone biosynthesis protein COQ9)%2C IPR013210 (Leucine-rich repeat-containing N-terminal%2C type 2)%3B GO:0004672 (protein kinase activity)%2C GO:0005515 (protein binding)%2C GO:0005524 (ATP binding)%2C GO:0006468 (protein phosphorylation)%2C GO:0006744 (ubiquinone biosynthetic…
Down	Aradu.WSB0H	receptor-like kinase 902%3B IPR001611 (Leucine-rich repeat)%2C IPR011009 (Protein kinase-like domain)%3B GO:0004672 (protein kinase activity)%2C GO:0005515 (protein binding)%2C GO:0005524 (ATP binding)%2C GO:0006468 (protein phosphorylation)
Down	Aradu.Y1B10	receptor-like kinase%3B IPR001611 (Leucine-rich repeat)%2C IPR011009 (Protein kinase-like domain)%2C IPR013210 (Leucine-rich repeat-containing N-terminal%2C type 2)%3B GO:0004672 (protein kinase activity)%2C GO:0005515 (protein binding)%2C GO:0006468 (protein phosphorylation)
Down	Aradu.Z101N	receptor-like kinase%3B IPR001611 (Leucine-rich repeat)%2C IPR013210 (Leucine-rich repeat-containing N-terminal%2C type 2)%3B GO:0005515 (protein binding)
Down	Aradu.U78VM	receptor-like kinase%3B IPR001611 (Leucine-rich repeat)%2C IPR013210 (Leucine-rich repeat-containing N-terminal%2C type 2)%3B GO:0005515 (protein binding)
Down	Aradu.UD9SB	receptor-like kinase%3B IPR001611 (Leucine-rich repeat)%3B GO:0005515 (protein binding)
Up	Aradu.66HB8	receptor-like kinase%3B IPR013210 (Leucine-rich repeat-containing N-terminal%2C type 2)%2C IPR025875 (Leucine rich repeat 4)
Up	Aradu.VV0JI	receptor-like protein kinase 2%3B IPR000315 (Zinc finger%2C B-box)%2C IPR001611 (Leucine-rich repeat)%2C IPR003591 (Leucine-rich repeat%2C typical subtype)%3B GO:0005515 (protein binding)%2C GO:0005622 (intracellular)%2C GO:0008270 (zinc ion binding)
Down	Aradu.I8R5I	receptor-like protein kinase 2%3B IPR001611 (Leucine-rich repeat)%2C IPR003591 (Leucine-rich repeat%2C typical subtype)%2C IPR011009 (Protein kinase-like domain)%2C IPR013210 (Leucine-rich repeat-containing N-terminal%2C type 2)%2C IPR013320 (Concanavalin A-like lectin/glucanase%2C subgroup)%3B GO:0004672 (protein kinase activity)%2C GO:0005515 (protein binding)%2C GO:0005524 (ATP binding)%2C GO:…
Down	Aradu.398CK	receptor-like protein kinase 2%3B IPR001611 (Leucine-rich repeat)%2C IPR003591 (Leucine-rich repeat%2C typical subtype)%2C IPR011009 (Protein kinase-like domain)%2C IPR013210 (Leucine-rich repeat-containing N-terminal%2C type 2)%3B GO:0004672 (protein kinase activity)%2C GO:0005515 (protein binding)%2C GO:0005524 (ATP binding)%2C GO:0006468 (protein phosphorylation)
Down	Aradu.H128Z	receptor-like protein kinase 2%3B IPR001611 (Leucine-rich repeat)%2C IPR003591 (Leucine-rich repeat%2C typical subtype)%2C IPR011009 (Protein kinase-like domain)%2C IPR013210 (Leucine-rich repeat-containing N-terminal%2C type 2)%3B GO:0004672 (protein kinase activity)%2C GO:0005515 (protein binding)%2C GO:0005524 (ATP binding)%2C GO:0006468 (protein phosphorylation)
Down	Araip.HV2UL	receptor-like protein kinase 2%3B IPR001611 (Leucine-rich repeat)%2C IPR003591 (Leucine-rich repeat%2C typical subtype)%2C IPR013210 (Leucine-rich repeat-containing N-terminal%2C type 2)%3B GO:0005515 (protein binding)
Up	Aradu.KMN20	receptor-like protein kinase 2%3B IPR001611 (Leucine-rich repeat)%2C IPR003591 (Leucine-rich repeat%2C typical subtype)%2C IPR013210 (Leucine-rich repeat-containing N-terminal%2C type 2)%3B GO:0005515 (protein binding)
Down	Aradu.GM66A	receptor-like protein kinase 2%3B IPR001611 (Leucine-rich repeat)%2C IPR003591 (Leucine-rich repeat%2C typical subtype)%2C IPR025875 (Leucine rich repeat 4)%3B GO:0005515 (protein binding)
Down	Araip.09PMN	receptor-like protein kinase 2%3B IPR001611 (Leucine-rich repeat)%2C IPR011009 (Protein kinase-like domain)%2C IPR025875 (Leucine rich repeat 4)%3B GO:0004672 (protein kinase activity)%2C GO:0005515 (protein binding)%2C GO:0005524 (ATP binding)%2C GO:0006468 (protein phosphorylation)
Down	Aradu.2UL23	receptor-like protein kinase 2%3B IPR001611 (Leucine-rich repeat)%2C IPR025875 (Leucine rich repeat 4)%3B GO:0005515 (protein binding)
Down	Aradu.E0ZXZ	receptor-like protein kinase 2%3B IPR003591 (Leucine-rich repeat%2C typical subtype)%2C IPR011009 (Protein kinase-like domain)%2C IPR013210 (Leucine-rich repeat-containing N-terminal%2C type 2)%3B GO:0004672 (protein kinase activity)%2C GO:0005524 (ATP binding)%2C GO:0006468 (protein phosphorylation)
Up	Araip.RWB9X	receptor-like protein kinase 2%3B IPR003591 (Leucine-rich repeat%2C typical subtype)%2C IPR013210 (Leucine-rich repeat-containing N-terminal%2C type 2)
Down	Aradu.HX3NM	receptor-like protein kinase 4%3B IPR003591 (Leucine-rich repeat%2C typical subtype)%2C IPR011009 (Protein kinase-like domain)%2C IPR013210 (Leucine-rich repeat-containing N-terminal%2C type 2)%2C IPR013320 (Concanavalin A-like lectin/glucanase%2C subgroup)%3B GO:0004672 (protein kinase activity)%2C GO:0006468 (protein phosphorylation)
Down	Araip.V3D37	receptor-like serine/threonine kinase 2%3B IPR000858 (S-locus glycoprotein)%2C IPR001480 (Bulb-type lectin domain)%2C IPR003609 (Apple-like)%2C IPR011009 (Protein kinase-like domain)%2C IPR013320 (Concanavalin A-like lectin/glucanase%2C subgroup)%2C IPR021820 (S-locus receptor kinase%2C C-terminal)%2C IPR024171 (S-receptor-like serine/threonine-protein kinase)%3B GO:0004672 (protein kinase activi…
Up	Aradu.ACY83	receptor-like serine/threonine kinase 2%3B IPR000858 (S-locus glycoprotein)%2C IPR001480 (Bulb-type lectin domain)%2C IPR003609 (Apple-like)%2C IPR011009 (Protein kinase-like domain)%2C IPR013320 (Concanavalin A-like lectin/glucanase%2C subgroup)%2C IPR021820 (S-locus receptor kinase%2C C-terminal)%2C IPR024171 (S-receptor-like serine/threonine-protein kinase)%3B GO:0004672 (protein kinase activi…
Down	Aradu.15JH1	receptor-like serine/threonine kinase 2%3B IPR000858 (S-locus glycoprotein)%2C IPR001480 (Bulb-type lectin domain)%2C IPR003609 (Apple-like)%2C IPR011009 (Protein kinase-like domain)%2C IPR013320 (Concanavalin A-like lectin/glucanase%2C subgroup)%2C IPR021820 (S-locus receptor kinase%2C C-terminal)%2C IPR024171 (S-receptor-like serine/threonine-protein kinase)%3B GO:0004672 (protein kinase activi…
Down	Aradu.R8UZU	receptor-like serine/threonine kinase 2%3B IPR000858 (S-locus glycoprotein)%2C IPR001480 (Bulb-type lectin domain)%2C IPR003609 (Apple-like)%2C IPR011009 (Protein kinase-like domain)%2C IPR013320 (Concanavalin A-like lectin/glucanase%2C subgroup)%2C IPR021820 (S-locus receptor kinase%2C C-terminal)%2C IPR024171 (S-receptor-like serine/threonine-protein kinase)%3B GO:0004672 (protein kinase activi…
Down	Aradu.N1UIU	receptor-like serine/threonine kinase 2%3B IPR000858 (S-locus glycoprotein)%2C IPR001480 (Bulb-type lectin domain)%2C IPR003609 (Apple-like)%2C IPR011009 (Protein kinase-like domain)%2C IPR013320 (Concanavalin A-like lectin/glucanase%2C subgroup)%2C IPR021820 (S-locus receptor kinase%2C C-terminal)%2C IPR024171 (S-receptor-like serine/threonine-protein kinase)%3B GO:0004672 (protein kinase activi…
Down	Aradu.A6YGJ	receptor-like serine/threonine kinase 2%3B IPR000858 (S-locus glycoprotein)%2C IPR001480 (Bulb-type lectin domain)%2C IPR003609 (Apple-like)%2C IPR011009 (Protein kinase-like domain)%2C IPR013320 (Concanavalin A-like lectin/glucanase%2C subgroup)%2C IPR022126 (S-locus%2C receptor kinase)%2C IPR024171 (S-receptor-like serine/threonine-protein kinase)%3B GO:0004672 (protein kinase activity)%2C GO:0…
Up	Aradu.YA6PI	Regulator of chromosome condensation (RCC1) family protein%3B IPR009091 (Regulator of chromosome condensation 1/beta-lactamase-inhibitor protein II)
Down	Aradu.TRD0U	Regulator of chromosome condensation (RCC1) family protein%3B IPR009091 (Regulator of chromosome condensation 1/beta-lactamase-inhibitor protein II)
Down	Aradu.H2G5C	Regulator of Vps4 activity in the MVB pathway protein%3B IPR005061 (Domain of unknown function DUF292%2C eukaryotic)
Up	Aradu.RPK4E	regulatory protein (NPR1)%3B IPR011333 (BTB/POZ fold)%2C IPR020683 (Ankyrin repeat-containing domain)%2C IPR021094 (NPR1/NIM1-like%2C C-terminal)%2C IPR024228 (Domain of unknown function DUF3420)%3B GO:0005515 (protein binding)
Down	Aradu.V7TK8	Related to C3HC4 zinc-binding integral peroxisomal membrane protein n%3D1 Tax%3DClaviceps purpurea (strain 20.1) RepID%3DM1WIL3_CLAP2%3B IPR006845 (Pex%2C N-terminal)%2C IPR013083 (Zinc finger%2C RING/FYVE/PHD-type)%2C IPR025654 (Peroxisome biogenesis factor 10)%3B GO:0005515 (protein binding)%2C GO:0005779 (integral component of peroxisomal membrane)%2C GO:0007031 (peroxisome organization)%2C GO…
Up	Aradu.TH8T3	Remorin family protein%3B IPR005516 (Remorin%2C C-terminal)
Down	Aradu.5N8I2	remorin-like [Glycine max]%3B IPR005516 (Remorin%2C C-terminal)
Down	Aradu.TP9LG	repetitive proline-rich cell wall protein 2-like [Glycine max]
Up	Araip.I5T1M	replication protein A 1A%3B IPR012340 (Nucleic acid-binding%2C OB-fold)
Down	Aradu.T3QX0	replication protein A 70 kDa DNA-binding subunit A-like [Glycine max]%3B IPR004591 (Replication factor-a protein 1 Rpa1)%3B GO:0003676 (nucleic acid binding)%2C GO:0003677 (DNA binding)%2C GO:0005634 (nucleus)%2C GO:0006260 (DNA replication)
Down	Araip.URB55	respiratory burst oxidase homolog B%3B IPR000778 (Cytochrome b245%2C heavy chain)%2C IPR011992 (EF-hand domain pair)%2C IPR013130 (Ferric reductase transmembrane component-like domain)%2C IPR017938 (Riboflavin synthase-like beta-barrel)%3B GO:0004601 (peroxidase activity)%2C GO:0005509 (calcium ion binding)%2C GO:0016020 (membrane)%2C GO:0016491 (oxidoreductase activity)%2C GO:0055114 (oxidation-…
Up	Aradu.W2RXK	response regulator 12%3B IPR010402 (CCT domain)%2C IPR011006 (CheY-like superfamily)%3B GO:0000156 (phosphorelay response regulator activity)%2C GO:0000160 (phosphorelay signal transduction system)%2C GO:0005515 (protein binding)
Down	Aradu.V5K3W	response regulator 3%3B IPR011006 (CheY-like superfamily)%3B GO:0000156 (phosphorelay response regulator activity)%2C GO:0000160 (phosphorelay signal transduction system)
Down	Aradu.9CP6U	response regulator 9%3B IPR011006 (CheY-like superfamily)%3B GO:0000156 (phosphorelay response regulator activity)%2C GO:0000160 (phosphorelay signal transduction system)
Down	Araip.HF7Z2	response to low sulfur 3
Down	Aradu.T7CCI	Reticulon family protein%3B IPR003388 (Reticulon)
Down	Aradu.Z3KHT	Reticulon family protein%3B IPR003388 (Reticulon)
Down	Araip.Q59GI	retinoblastoma-binding protein 5-like isoform X1 [Glycine max]%3B IPR015943 (WD40/YVTN repeat-like-containing domain)%3B GO:0005515 (protein binding)
Down	Aradu.3Q89L	retinoblastoma-binding protein 5-like isoform X3 [Glycine max]%3B IPR015943 (WD40/YVTN repeat-like-containing domain)%3B GO:0005515 (protein binding)
Up	Aradu.WH755	Rhodanese/Cell cycle control phosphatase superfamily protein%3B IPR001763 (Rhodanese-like domain)
Up	Aradu.VB3DF	Rhodanese/Cell cycle control phosphatase superfamily protein%3B IPR001763 (Rhodanese-like domain)
Up	Aradu.RWZ7N	rhodanese-like domain-containing protein 4%2C chloroplastic-like [Glycine max]%3B IPR001763 (Rhodanese-like domain)
Down	Aradu.M2I9A	rhodanese-related sulfurtransferase%3B IPR001763 (Rhodanese-like domain)
Up	Aradu.HM0P2	RHOMBOID-like protein 10%3B IPR002610 (Peptidase S54%2C rhomboid)%3B GO:0004252 (serine-type endopeptidase activity)%2C GO:0006508 (proteolysis)%2C GO:0016021 (integral component of membrane)
Down	Aradu.K0BKL	RHOMBOID-like protein 13%3B IPR022764 (Peptidase S54%2C rhomboid domain)%3B GO:0004252 (serine-type endopeptidase activity)%2C GO:0016021 (integral component of membrane)
Down	Aradu.QX9N9	riboflavin biosynthesis protein%2C putative%3B IPR000422 (3%2C4-dihydroxy-2-butanone 4-phosphate synthase%2C RibB)%2C IPR000926 (GTP cyclohydrolase II%2C RibA)%2C IPR017945 (DHBP synthase RibB-like alpha/beta domain)%3B GO:0003935 (GTP cyclohydrolase II activity)%2C GO:0009231 (riboflavin biosynthetic process)
Down	Araip.0P6TW	Riboflavin synthase%2C alpha subunit n%3D2 Tax%3DChloroflexus RepID%3DA9WFQ9_CHLAA%3B IPR001783 (Lumazine-binding protein)%2C IPR023366 (ATP synthase subunit alpha-like domain)%2C IPR026017 (Lumazine-binding domain)%3B GO:0004746 (riboflavin synthase activity)%2C GO:0009231 (riboflavin biosynthetic process)%2C GO:0016491 (oxidoreductase activity)%2C GO:0055114 (oxidation-reduction process)
Down	Aradu.IMK3L	ribonuclease H n%3D3 Tax%3DSpirosoma RepID%3DUPI00036F670D%3B IPR009027 (Ribosomal protein L9/RNase H1%2C N-terminal)
Up	Aradu.81L13	Ribosomal L28 family%3B IPR001383 (Ribosomal protein L28)%3B GO:0003735 (structural constituent of ribosome)%2C GO:0005622 (intracellular)%2C GO:0005840 (ribosome)%2C GO:0006412 (translation)
Up	Aradu.95YVR	Ribosomal L28 family%3B IPR001383 (Ribosomal protein L28)%3B GO:0003735 (structural constituent of ribosome)%2C GO:0005622 (intracellular)%2C GO:0005840 (ribosome)%2C GO:0006412 (translation)
Up	Aradu.KCS8E	Ribosomal protein L10 family protein%3B IPR001790 (Ribosomal protein L10/acidic P0)%3B GO:0005622 (intracellular)%2C GO:0042254 (ribosome biogenesis)
Up	Aradu.6KM94	Ribosomal protein L11 family protein%3B IPR000911 (Ribosomal protein L11/L12)%3B GO:0003735 (structural constituent of ribosome)%2C GO:0005840 (ribosome)%2C GO:0006412 (translation)
Up	Aradu.AXZ18	Ribosomal protein L13 family protein%3B IPR005822 (Ribosomal protein L13)%2C IPR023564 (Ribosomal protein L13 domain)%3B GO:0003735 (structural constituent of ribosome)%2C GO:0005840 (ribosome)%2C GO:0006412 (translation)
Up	Araip.XHZ2T	ribosomal protein L15%3B IPR005749 (Ribosomal protein L15%2C bacterial-type)%2C IPR021131 (Ribosomal protein L18e/L15P)%3B GO:0003735 (structural constituent of ribosome)%2C GO:0006412 (translation)%2C GO:0015934 (large ribosomal subunit)
Up	Araip.58GE6	ribosomal protein L15%3B IPR005749 (Ribosomal protein L15%2C bacterial-type)%2C IPR021131 (Ribosomal protein L18e/L15P)%3B GO:0003735 (structural constituent of ribosome)%2C GO:0006412 (translation)%2C GO:0015934 (large ribosomal subunit)
Up	Aradu.P8DJL	Ribosomal protein L17 family protein%3B IPR000456 (Ribosomal protein L17)%3B GO:0003735 (structural constituent of ribosome)%2C GO:0005622 (intracellular)%2C GO:0005840 (ribosome)%2C GO:0006412 (translation)
Up	Araip.I7WTL	Ribosomal protein L3 family protein%3B IPR000597 (Ribosomal protein L3)%2C IPR009000 (Translation protein%2C beta-barrel domain)%3B GO:0003735 (structural constituent of ribosome)%2C GO:0005622 (intracellular)%2C GO:0005840 (ribosome)%2C GO:0006412 (translation)
Down	Aradu.TW0A0	Ribosomal protein L35
Up	Aradu.A4D5T	Ribosomal protein L6 family%3B IPR000702 (Ribosomal protein L6)%3B GO:0003735 (structural constituent of ribosome)%2C GO:0005622 (intracellular)%2C GO:0005840 (ribosome)%2C GO:0006412 (translation)%2C GO:0019843 (rRNA binding)
Up	Araip.VZ71W	Ribosomal protein L6 family%3B IPR000702 (Ribosomal protein L6)%3B GO:0003735 (structural constituent of ribosome)%2C GO:0005840 (ribosome)%2C GO:0006412 (translation)%2C GO:0019843 (rRNA binding)
Up	Aradu.P74XB	Ribosomal protein L6 family%3B IPR000702 (Ribosomal protein L6)%3B GO:0003735 (structural constituent of ribosome)%2C GO:0005840 (ribosome)%2C GO:0006412 (translation)%2C GO:0019843 (rRNA binding)
Up	Aradu.FFW2J	ribosomal protein L9%3B IPR000244 (Ribosomal protein L9)%3B GO:0003735 (structural constituent of ribosome)%2C GO:0005622 (intracellular)%2C GO:0005840 (ribosome)%2C GO:0006412 (translation)
Up	Aradu.P7SHR	Ribosomal protein PSRP-3/Ycf65%3B IPR006924 (Ribosomal protein PSRP-3/Ycf65)%3B GO:0003735 (structural constituent of ribosome)%2C GO:0005840 (ribosome)%2C GO:0006412 (translation)
Up	Aradu.R8MP8	ribosomal protein S1%3B IPR000110 (Ribosomal protein S1)%3B GO:0003723 (RNA binding)%2C GO:0003735 (structural constituent of ribosome)%2C GO:0005840 (ribosome)%2C GO:0006412 (translation)
Up	Aradu.G01FC	ribosomal protein S17%3B IPR000266 (Ribosomal protein S17)%2C IPR012340 (Nucleic acid-binding%2C OB-fold)%3B GO:0003735 (structural constituent of ribosome)%2C GO:0005622 (intracellular)%2C GO:0005840 (ribosome)%2C GO:0006412 (translation)
Up	Aradu.43D7U	Ribosomal protein S21 family protein%3B IPR001911 (Ribosomal protein S21)%3B GO:0003735 (structural constituent of ribosome)%2C GO:0005622 (intracellular)%2C GO:0005840 (ribosome)%2C GO:0006412 (translation)
Up	Aradu.71C1P	Ribulose bisphosphate carboxylase (small chain) family protein%3B IPR000894 (Ribulose bisphosphate carboxylase small chain%2C domain)%2C IPR024680 (Ribulose-1%2C5-bisphosphate carboxylase small subunit%2C N-terminal)%2C IPR024681 (Ribulose bisphosphate carboxylase%2C small chain)
Up	Aradu.J33DL	Ribulose bisphosphate carboxylase (small chain) family protein%3B IPR000894 (Ribulose bisphosphate carboxylase small chain%2C domain)%2C IPR024680 (Ribulose-1%2C5-bisphosphate carboxylase small subunit%2C N-terminal)%2C IPR024681 (Ribulose bisphosphate carboxylase%2C small chain)
Up	Aradu.GDA41	ribulose bisphosphate carboxylase/oxygenase activase%3B IPR027417 (P-loop containing nucleoside triphosphate hydrolase)%3B GO:0005524 (ATP binding)
Up	Aradu.5IY98	ribulose bisphosphate carboxylase/oxygenase activase%3B IPR027417 (P-loop containing nucleoside triphosphate hydrolase)%3B GO:0005524 (ATP binding)
Down	Aradu.U61F3	RING/FYVE/PHD zinc finger superfamily protein%3B IPR011016 (Zinc finger%2C RING-CH-type)%2C IPR013083 (Zinc finger%2C RING/FYVE/PHD-type)%2C IPR022143 (Protein of unknown function DUF3675)%3B GO:0008270 (zinc ion binding)
Down	Aradu.YU18J	RING/U-box superfamily protein
Down	Araip.1R7GG	RING/U-box superfamily protein
Up	Aradu.BU5Q7	RING/U-box superfamily protein%3B IPR013083 (Zinc finger%2C RING/FYVE/PHD-type)%3B GO:0005515 (protein binding)%2C GO:0008270 (zinc ion binding)
Up	Araip.21F2H	RING/U-box superfamily protein%3B IPR013083 (Zinc finger%2C RING/FYVE/PHD-type)%3B GO:0005515 (protein binding)%2C GO:0008270 (zinc ion binding)
Down	Araip.C20YE	RING/U-box superfamily protein%3B IPR013083 (Zinc finger%2C RING/FYVE/PHD-type)%3B GO:0005515 (protein binding)%2C GO:0008270 (zinc ion binding)
Up	Aradu.CI09B	RING/U-box superfamily protein%3B IPR013083 (Zinc finger%2C RING/FYVE/PHD-type)%3B GO:0005515 (protein binding)%2C GO:0008270 (zinc ion binding)
Up	Aradu.DC3ML	RING-H2 finger protein 2B%3B IPR013083 (Zinc finger%2C RING/FYVE/PHD-type)%3B GO:0005515 (protein binding)%2C GO:0008270 (zinc ion binding)
Down	Aradu.X9N95	RING-H2 finger protein 2B%3B IPR013083 (Zinc finger%2C RING/FYVE/PHD-type)%3B GO:0005515 (protein binding)%2C GO:0008270 (zinc ion binding)
Down	Aradu.E6676	RING-H2 finger protein 2B%3B IPR013083 (Zinc finger%2C RING/FYVE/PHD-type)%3B GO:0005515 (protein binding)%2C GO:0008270 (zinc ion binding)
Up	Aradu.CB8LP	RING-H2 finger protein 2B%3B IPR013083 (Zinc finger%2C RING/FYVE/PHD-type)%3B GO:0005515 (protein binding)%2C GO:0008270 (zinc ion binding)
Down	Aradu.1F1FD	RING-H2 finger protein ATL2-like [Glycine max]%3B IPR013083 (Zinc finger%2C RING/FYVE/PHD-type)
Down	Aradu.8FL49	Ripening related protein family%3B IPR009009 (RlpA-like double-psi beta-barrel domain)
Up	Aradu.S2A7Z	RNA binding%3B RNA binding%3B IPR012340 (Nucleic acid-binding%2C OB-fold)%3B GO:0003723 (RNA binding)
Down	Aradu.CSH6U	RNA polymerase II transcriptional coactivator%3B IPR009044 (ssDNA-binding transcriptional regulator)%2C IPR009057 (Homeodomain-like)%2C IPR014876 (DEK%2C C-terminal)%3B GO:0003677 (DNA binding)%2C GO:0003713 (transcription coactivator activity)
Up	Aradu.43H0L	RNA polymerase sigma factor%3B IPR014284 (RNA polymerase sigma-70 like domain)%3B GO:0003677 (DNA binding)%2C GO:0003700 (sequence-specific DNA binding transcription factor activity)%2C GO:0016987 (sigma factor activity)
Up	Aradu.YF1F6	RNA polymerase sigma factor%3B IPR014284 (RNA polymerase sigma-70 like domain)%3B GO:0003677 (DNA binding)%2C GO:0003700 (sequence-specific DNA binding transcription factor activity)%2C GO:0016987 (sigma factor activity)
Up	Aradu.560A1	RNA polymerase sigma factor%3B IPR014284 (RNA polymerase sigma-70 like domain)%3B GO:0003677 (DNA binding)%2C GO:0003700 (sequence-specific DNA binding transcription factor activity)%2C GO:0016987 (sigma factor activity)
Down	Aradu.KR8L4	RNA-binding (RRM/RBD/RNP motifs) family protein%3B IPR012677 (Nucleotide-binding%2C alpha-beta plait)%3B GO:0000166 (nucleotide binding)%2C GO:0003676 (nucleic acid binding)
Down	Aradu.X63QR	RNA-binding KH domain-containing protein%3B IPR004087 (K Homology domain)%3B GO:0003723 (RNA binding)
Up	Aradu.IJX5P	RNA-binding KH domain-containing protein%3B IPR004087 (K Homology domain)%3B GO:0003723 (RNA binding)
Up	Aradu.AN6JJ	RNA-binding protein 39-like [Glycine max]%3B IPR012677 (Nucleotide-binding%2C alpha-beta plait)%3B GO:0000166 (nucleotide binding)%2C GO:0003676 (nucleic acid binding)
Up	Araip.S7GYW	RNA-binding protein 39-like [Glycine max]%3B IPR012677 (Nucleotide-binding%2C alpha-beta plait)%3B GO:0000166 (nucleotide binding)%2C GO:0003676 (nucleic acid binding)
Up	Aradu.I4E8B	RNA-binding protein 42-like [Glycine max]%3B IPR012677 (Nucleotide-binding%2C alpha-beta plait)%3B GO:0000166 (nucleotide binding)%2C GO:0003676 (nucleic acid binding)
Up	Aradu.REJ9M	RNA-binding protein 42-like [Glycine max]%3B IPR012677 (Nucleotide-binding%2C alpha-beta plait)%3B GO:0000166 (nucleotide binding)%2C GO:0003676 (nucleic acid binding)
Down	Aradu.MG2E6	RNA-binding protein%2C putative n%3D1 Tax%3DRicinus communis RepID%3DB9RA66_RICCO%3B IPR007201 (RNA recognition motif 2)%2C IPR012677 (Nucleotide-binding%2C alpha-beta plait)%3B GO:0000166 (nucleotide binding)%2C GO:0003676 (nucleic acid binding)
Down	Araip.TQ462	RNA-dependent RNA polymerase family protein%3B IPR007855 (RNA-dependent RNA polymerase%2C eukaryotic-type)%3B GO:0003968 (RNA-directed RNA polymerase activity)
Down	Aradu.JS1IG	RNAligase isoform 2 n%3D1 Tax%3DTheobroma cacao RepID%3DUPI00042B43C4
Down	Araip.HC3TJ	RNase P Rpr2/Rpp21 subunit domain protein%3B IPR007175 (RNAse P%2C Rpr2/Rpp21 subunit)
Up	Aradu.UP79J	root meristem growth factor 9-like [Glycine max]
Down	Aradu.WPG15	ROP guanine nucleotide exchange factor 5%3B IPR005512 (PRONE domain)%3B GO:0005089 (Rho guanyl-nucleotide exchange factor activity)
Down	Aradu.HEG3V	RPM1 interacting protein 4%3B IPR008700 (Pathogenic type III effector avirulence factor Avr cleavage site)
Down	Araip.X6XTD	RPM1-interacting protein 4 (RIN4) family protein
Down	Aradu.7K02I	RPM1-interacting protein 4-like [Glycine max]%3B IPR008700 (Pathogenic type III effector avirulence factor Avr cleavage site)
Up	Aradu.EW82S	ruBisCO-associated protein-like [Glycine max]%3B IPR017853 (Glycoside hydrolase%2C superfamily)%3B GO:0005975 (carbohydrate metabolic process)
Up	Aradu.1VZ3I	rubredoxin family protein%3B IPR001478 (PDZ domain)%2C IPR004039 (Rubredoxin-type fold)%3B GO:0005506 (iron ion binding)%2C GO:0005515 (protein binding)
Up	Aradu.JRR3K	Rubredoxin-like superfamily protein%3B IPR004039 (Rubredoxin-type fold)%3B GO:0005506 (iron ion binding)
Up	Aradu.NJ4GF	Rubredoxin-like superfamily protein%3B IPR004039 (Rubredoxin-type fold)%3B GO:0005506 (iron ion binding)
Up	Araip.5E7AX	RWP-RK domain-containing protein
Up	Araip.FB7A7	RWP-RK domain-containing protein
Down	Aradu.S9DNW	S-adenosyl-L-methionine-dependent methyltransferase%3B IPR019410 (Nicotinamide N-methyltransferase-like)
Up	Aradu.A3EYY	S-adenosyl-L-methionine-dependent methyltransferases superfamily protein
Down	Araip.B8YGG	S-adenosyl-L-methionine-dependent methyltransferases superfamily protein
Down	Aradu.YTF7E	S-adenosyl-L-methionine-dependent methyltransferases superfamily protein%3B IPR004159 (Putative S-adenosyl-L-methionine-dependent methyltransferase)%3B GO:0008168 (methyltransferase activity)
Up	Aradu.RG8LQ	S-adenosyl-L-methionine-dependent methyltransferases superfamily protein%3B IPR005299 (SAM dependent carboxyl methyltransferase)%3B GO:0008168 (methyltransferase activity)
Up	Aradu.PHB5M	scarecrow-like transcription factor PAT1-like [Glycine max]%3B IPR005202 (Transcription factor GRAS)
Down	Aradu.IQ81A	scarecrow-like transcription factor PAT1-like [Glycine max]%3B IPR005202 (Transcription factor GRAS)
Down	Aradu.Y37CK	SEC1 family transport protein SLY1-like [Glycine max]%3B IPR001619 (Sec1-like protein)%2C IPR027482 (Sec1-like%2C domain 2)%3B GO:0006904 (vesicle docking involved in exocytosis)%2C GO:0016192 (vesicle-mediated transport)
Down	Araip.DFV0B	Sec14p-like phosphatidylinositol transfer family protein%3B IPR001251 (CRAL-TRIO domain)%2C IPR011074 (CRAL/TRIO%2C N-terminal domain)
Up	Aradu.3N6NA	Sec14p-like phosphatidylinositol transfer family protein%3B IPR001251 (CRAL-TRIO domain)%2C IPR011074 (CRAL/TRIO%2C N-terminal domain)
Up	Aradu.SQ2UE	Sec14p-like phosphatidylinositol transfer family protein%3B IPR001251 (CRAL-TRIO domain)%2C IPR011074 (CRAL/TRIO%2C N-terminal domain)
Down	Aradu.H1LH4	Secretory carrier membrane protein (SCAMP) family protein%3B IPR007273 (SCAMP)%3B GO:0015031 (protein transport)%2C GO:0016021 (integral component of membrane)
Down	Aradu.CA5TC	Secretory carrier membrane protein (SCAMP) family protein%3B IPR007273 (SCAMP)%3B GO:0015031 (protein transport)%2C GO:0016021 (integral component of membrane)
Up	Aradu.EV49X	sedoheptulose-bisphosphatase%3B IPR000146 (Fructose-1%2C6-bisphosphatase class 1/Sedoheputulose-1%2C7-bisphosphatase)%3B GO:0005975 (carbohydrate metabolic process)%2C GO:0042578 (phosphoric ester hydrolase activity)
Up	Aradu.SK1BS	seed linoleate 9S-lipoxygenase%3B IPR000907 (Lipoxygenase)%2C IPR008976 (Lipase/lipooxygenase%2C PLAT/LH2)%2C IPR027433 (Lipoxygenase%2C domain 3)%3B GO:0005506 (iron ion binding)%2C GO:0005515 (protein binding)%2C GO:0016165 (linoleate 13S-lipoxygenase activity)%2C GO:0046872 (metal ion binding)%2C GO:0055114 (oxidation-reduction process)
Down	Araip.CE8M2	selenium-binding protein 2%3B IPR008826 (Selenium-binding protein)%3B GO:0008430 (selenium binding)
Up	Aradu.LXN93	senescence-inducible chloroplast stay-green protein 2 [Glycine max]%3B IPR024438 (Staygreen protein)
Up	Aradu.NDR67	septum-promoting GTP-binding protein 1-like [Glycine max]%3B IPR001806 (Small GTPase superfamily)%2C IPR027417 (P-loop containing nucleoside triphosphate hydrolase)%3B GO:0005525 (GTP binding)%2C GO:0005622 (intracellular)%2C GO:0007264 (small GTPase mediated signal transduction)%2C GO:0015031 (protein transport)
Down	Araip.EV6KP	serine carboxypeptidase-like 11%3B IPR001563 (Peptidase S10%2C serine carboxypeptidase)%3B GO:0004185 (serine-type carboxypeptidase activity)%2C GO:0006508 (proteolysis)
Down	Aradu.K9I7H	serine carboxypeptidase-like 15%3B IPR001563 (Peptidase S10%2C serine carboxypeptidase)%3B GO:0004185 (serine-type carboxypeptidase activity)%2C GO:0006508 (proteolysis)
Up	Aradu.79EBV	serine carboxypeptidase-like 18%3B IPR001563 (Peptidase S10%2C serine carboxypeptidase)%3B GO:0004185 (serine-type carboxypeptidase activity)%2C GO:0006508 (proteolysis)
Down	Aradu.JXL5S	serine carboxypeptidase-like 2%3B IPR001563 (Peptidase S10%2C serine carboxypeptidase)%3B GO:0004185 (serine-type carboxypeptidase activity)%2C GO:0006508 (proteolysis)
Up	Aradu.44KEY	serine carboxypeptidase-like 29%3B IPR001563 (Peptidase S10%2C serine carboxypeptidase)%3B GO:0004185 (serine-type carboxypeptidase activity)%2C GO:0006508 (proteolysis)
Up	Aradu.Z2IH6	serine carboxypeptidase-like 4%3B IPR001563 (Peptidase S10%2C serine carboxypeptidase)%3B GO:0004185 (serine-type carboxypeptidase activity)%2C GO:0006508 (proteolysis)
Down	Aradu.GI12E	serine carboxypeptidase-like 7%3B IPR001563 (Peptidase S10%2C serine carboxypeptidase)%3B GO:0004185 (serine-type carboxypeptidase activity)%2C GO:0006508 (proteolysis)
Up	Aradu.FH7I5	serine hydroxymethyltransferase 2%3B IPR001085 (Serine hydroxymethyltransferase)%2C IPR015424 (Pyridoxal phosphate-dependent transferase)%3B GO:0003824 (catalytic activity)%2C GO:0004372 (glycine hydroxymethyltransferase activity)%2C GO:0006544 (glycine metabolic process)%2C GO:0006563 (L-serine metabolic process)%2C GO:0030170 (pyridoxal phosphate binding)
Up	Aradu.0AU5N	Serine protease inhibitor n%3D1 Tax%3DArachis hypogaea RepID%3DQ2VMU0_ARAHY
Down	Aradu.IH0N2	serine/arginine repetitive matrix protein 2-like isoform X1 [Glycine max]
Up	Araip.38UGY	serine/threonine-protein kinase HT1 isoform X3 [Glycine max]%3B IPR011009 (Protein kinase-like domain)%3B GO:0004672 (protein kinase activity)%2C GO:0005524 (ATP binding)%2C GO:0006468 (protein phosphorylation)
Down	Aradu.QIJ36	serine/threonine-protein phosphatase 7 long form homolog [Glycine max]%3B IPR019557 (Aminotransferase-like%2C plant mobile domain)
Down	Aradu.3C61H	serine/threonine-protein phosphatase 7 long form homolog [Glycine max]%3B IPR019557 (Aminotransferase-like%2C plant mobile domain)
Down	Araip.RNC6M	SET domain group 40%3B IPR001214 (SET domain)%2C IPR015353 (Rubisco LSMT%2C substrate-binding domain)%3B GO:0005515 (protein binding)
Down	Aradu.M530F	set1/Ash2 histone methyltransferase complex subunit ASH2-like [Glycine max]%3B IPR003877 (SPla/RYanodine receptor SPRY)%2C IPR008985 (Concanavalin A-like lectin/glucanases superfamily)%3B GO:0005515 (protein binding)
Up	Aradu.99G6F	shaggy-related kinase 11%3B IPR011009 (Protein kinase-like domain)%3B GO:0004672 (protein kinase activity)%2C GO:0005524 (ATP binding)%2C GO:0006468 (protein phosphorylation)
Up	Aradu.KZ4HC	shikimate kinase 1%3B IPR000623 (Shikimate kinase/Threonine synthase-like 1)%2C IPR027417 (P-loop containing nucleoside triphosphate hydrolase)
Up	Aradu.U6TH3	SHOOT1 protein [Glycine max]%3B IPR001478 (PDZ domain)%2C IPR011990 (Tetratricopeptide-like helical)%3B GO:0005515 (protein binding)
Down	Araip.FWG89	short-chain dehydrogenase reductase 2a-like [Glycine max]%3B IPR002347 (Glucose/ribitol dehydrogenase)%3B GO:0008152 (metabolic process)%2C GO:0016491 (oxidoreductase activity)
Up	Aradu.XUL08	short-chain dehydrogenase/reductase family protein%3B IPR002347 (Glucose/ribitol dehydrogenase)%3B GO:0008152 (metabolic process)%2C GO:0016491 (oxidoreductase activity)
Up	Aradu.2P8HG	short-chain dehydrogenase/reductase%3B IPR002347 (Glucose/ribitol dehydrogenase)%3B GO:0008152 (metabolic process)%2C GO:0016491 (oxidoreductase activity)
Down	Aradu.W7RTE	short-chain dehydrogenase-reductase B%3B IPR002347 (Glucose/ribitol dehydrogenase)%3B GO:0008152 (metabolic process)%2C GO:0016491 (oxidoreductase activity)
Up	Aradu.64BNM	short-chain dehydrogenase-reductase B%3B IPR002347 (Glucose/ribitol dehydrogenase)%3B GO:0008152 (metabolic process)%2C GO:0016491 (oxidoreductase activity)
Up	Aradu.LYQ47	short-chain dehydrogenase-reductase B%3B IPR002347 (Glucose/ribitol dehydrogenase)%3B GO:0008152 (metabolic process)%2C GO:0016491 (oxidoreductase activity)
Up	Aradu.G2902	short-chain dehydrogenase-reductase B%3B IPR002347 (Glucose/ribitol dehydrogenase)%3B GO:0008152 (metabolic process)%2C GO:0016491 (oxidoreductase activity)
Up	Aradu.X33LT	short-chain dehydrogenase-reductase B%3B IPR002347 (Glucose/ribitol dehydrogenase)%3B GO:0008152 (metabolic process)%2C GO:0016491 (oxidoreductase activity)
Up	Aradu.INB2E	short-chain dehydrogenase-reductase B%3B IPR002347 (Glucose/ribitol dehydrogenase)%3B GO:0008152 (metabolic process)%2C GO:0016491 (oxidoreductase activity)
Down	Aradu.9Q3CE	short-chain dehydrogenase-reductase B%3B IPR002347 (Glucose/ribitol dehydrogenase)%3B GO:0008152 (metabolic process)%2C GO:0016491 (oxidoreductase activity)
Up	Aradu.RL3UB	short-chain dehydrogenase-reductase%3B IPR002347 (Glucose/ribitol dehydrogenase)%3B GO:0008152 (metabolic process)%2C GO:0016491 (oxidoreductase activity)
Down	Aradu.9TL9J	shugoshin-1-like isoform X1 [Glycine max]
Up	Aradu.X7290	sieve element occlusion protein%3B IPR027942 (Sieve element occlusion%2C N-terminal)%2C IPR027944 (Sieve element occlusion%2C C-terminal)
Down	Araip.9TB9L	sieve element occlusion protein%3B IPR027942 (Sieve element occlusion%2C N-terminal)%2C IPR027944 (Sieve element occlusion%2C C-terminal)
Up	Araip.5G5MC	sieve element occlusion protein%3B IPR027942 (Sieve element occlusion%2C N-terminal)%2C IPR027944 (Sieve element occlusion%2C C-terminal)
Up	Aradu.UT62F	sigma factor sigb regulation rsbq-like protein
Up	Aradu.E7174	signal recognition particle receptor subunit alpha-like [Glycine max]
Up	Aradu.T08NC	Similar to Maltose excess protein 1
Up	Aradu.D81FK	single-stranded DNA-binding protein WHY1%2C chloroplastic-like isoform X1 [Glycine max]%3B IPR013742 (Plant transcription factor)%3B GO:0003677 (DNA binding)
Up	Aradu.316F6	Single-stranded nucleic acid binding R3H protein%3B IPR001374 (Single-stranded nucleic acid binding R3H)%2C IPR024771 (SUZ domain)%3B GO:0003676 (nucleic acid binding)
Down	Aradu.EX5H6	SKIP interacting protein
Down	Aradu.LXV9A	small nuclear ribonucleoprotein associated protein B%3B IPR010920 (Like-Sm (LSM) domain)%2C IPR017131 (Small ribonucleoprotein associated%2C SmB/SmN)
Down	Araip.II1CF	small nuclear ribonucleoprotein associated protein B%3B IPR010920 (Like-Sm (LSM) domain)%2C IPR017131 (Small ribonucleoprotein associated%2C SmB/SmN)
Down	Aradu.D8RMH	SMG9-like protein%3B IPR027417 (P-loop containing nucleoside triphosphate hydrolase)
Up	Aradu.81RLF	SNARE associated Golgi protein family%3B IPR015414 (SNARE associated Golgi protein)
Up	Aradu.VAW6K	Sodium Bile acid symporter family%3B IPR002657 (Bile acid:sodium symporter)%3B GO:0006814 (sodium ion transport)%2C GO:0008508 (bile acid:sodium symporter activity)%2C GO:0016020 (membrane)
Down	Aradu.939VA	sodium/calcium exchanger family protein / calcium-binding EF hand family protein%3B IPR011992 (EF-hand domain pair)%3B GO:0005509 (calcium ion binding)
Up	Aradu.CXJ5P	solanesyl diphosphate synthase 1%3B IPR017446 (Polyprenyl synthetase-related)%3B GO:0008299 (isoprenoid biosynthetic process)%2C GO:0015979 (photosynthesis)
Down	Aradu.V6ZCM	soluble N-ethylmaleimide-sensitive factor adaptor protein 33%3B IPR000727 (Target SNARE coiled-coil domain)%3B GO:0005515 (protein binding)
Up	Aradu.X685X	solute carrier family 35 protein%3B IPR009262 (Solute carrier family 35 member SLC35F1/F2/F6)%3B GO:0006810 (transport)%2C GO:0016021 (integral component of membrane)
Up	Araip.6G7UA	solute carrier family 35 protein%3B IPR009262 (Solute carrier family 35 member SLC35F1/F2/F6)%3B GO:0006810 (transport)%2C GO:0016021 (integral component of membrane)
Up	Aradu.VWN4Y	SOUL heme-binding family protein%3B IPR006917 (SOUL haem-binding protein)%2C IPR011256 (Regulatory factor%2C effector binding domain)%2C IPR018790 (Protein of unknown function DUF2358)
Up	Aradu.NHM67	spermidine hydroxycinnamoyl transferase-like [Glycine max]%3B IPR003480 (Transferase)%2C IPR023213 (Chloramphenicol acetyltransferase-like domain)
Up	Araip.34WP9	spermidine hydroxycinnamoyl transferase-like [Glycine max]%3B IPR003480 (Transferase)%2C IPR023213 (Chloramphenicol acetyltransferase-like domain)
Down	Araip.J2AQK	spermidine hydroxycinnamoyl transferase-like [Glycine max]%3B IPR003480 (Transferase)%2C IPR023213 (Chloramphenicol acetyltransferase-like domain)
Up	Araip.I5203	spermidine hydroxycinnamoyl transferase-like [Glycine max]%3B IPR003480 (Transferase)%2C IPR023213 (Chloramphenicol acetyltransferase-like domain)
Up	Aradu.A1KE0	spermidine synthase 1%3B IPR001045 (Spermidine/spermine synthases family)%3B GO:0003824 (catalytic activity)
Up	Aradu.PS7HL	spermidine synthase 1%3B IPR001045 (Spermidine/spermine synthases family)%3B GO:0003824 (catalytic activity)
Down	Araip.NDR0B	SPFH/Band 7/PHB domain-containing membrane-associated protein family%3B IPR001107 (Band 7 protein)%3B GO:0016020 (membrane)
Up	Aradu.TV4LZ	SPIRAL1-like1
Down	Aradu.XA5F9	SPla/RYanodine receptor (SPRY) domain-containing protein%3B IPR003877 (SPla/RYanodine receptor SPRY)%2C IPR008985 (Concanavalin A-like lectin/glucanases superfamily)%3B GO:0005515 (protein binding)
Up	Araip.IL789	SPX domain-containing membrane protein At4g22990-like isoform X5 [Glycine max]%3B IPR016196 (Major facilitator superfamily domain%2C general substrate transporter)
Up	Aradu.H6IWN	squalene monooxygenase 2%3B IPR003042 (Aromatic-ring hydroxylase-like)%2C IPR006076 (FAD dependent oxidoreductase)%3B GO:0004506 (squalene monooxygenase activity)%2C GO:0008152 (metabolic process)%2C GO:0016021 (integral component of membrane)%2C GO:0016491 (oxidoreductase activity)%2C GO:0050660 (flavin adenine dinucleotide binding)%2C GO:0055114 (oxidation-reduction process)
Down	Aradu.UUC9E	squamosa promoter binding protein-like 5%3B IPR017238 (Squamosa promoter-binding protein)%3B GO:0003677 (DNA binding)%2C GO:0005634 (nucleus)
Up	Aradu.3X1QZ	Staphylococcal nuclease homologue%3B IPR016071 (Staphylococcal nuclease (SNase-like)%2C OB-fold)%3B GO:0003676 (nucleic acid binding)
Down	Aradu.BR38W	starch synthase 2%3B IPR011835 (Glycogen/starch synthase%2C ADP-glucose type)%3B GO:0009011 (starch synthase activity)%2C GO:0009058 (biosynthetic process)%2C GO:0009250 (glucan biosynthetic process)
Down	Aradu.077AT	stem-specific protein TSJT1-like [Glycine max]%3B IPR024286 (Domain of unknown function DUF3700)
Up	Aradu.ZLQ90	stress enhanced protein 1%3B IPR023329 (Chlorophyll a/b binding protein domain)
Down	Aradu.G0M2E	stress-associated endoplasmic reticulum protein 2 [Glycine max]
Down	Araip.NNI43	strictosidine synthase-like 3%3B IPR011042 (Six-bladed beta-propeller%2C TolB-like)%3B GO:0009058 (biosynthetic process)%2C GO:0016844 (strictosidine synthase activity)
Down	Aradu.4M3VD	strictosidine synthase-like 4%3B IPR011042 (Six-bladed beta-propeller%2C TolB-like)%3B GO:0009058 (biosynthetic process)%2C GO:0016844 (strictosidine synthase activity)
Up	Aradu.4D08Y	structural constituent of ribosome protein%3B IPR005134 (Uncharacterised protein family UPF0114)
Down	Aradu.82VY6	structural maintenance of chromosomes 2%3B IPR003395 (RecF/RecN/SMC%2C N-terminal)%2C IPR010935 (SMCs flexible hinge)%2C IPR024704 (Structural maintenance of chromosomes protein)%2C IPR027417 (P-loop containing nucleoside triphosphate hydrolase)%3B GO:0000796 (condensin complex)%2C GO:0005515 (protein binding)%2C GO:0005524 (ATP binding)%2C GO:0005694 (chromosome)%2C GO:0006281 (DNA repair)%2C GO…
Down	Aradu.W5N1N	structural maintenance of chromosomes 2%3B IPR003395 (RecF/RecN/SMC%2C N-terminal)%2C IPR010935 (SMCs flexible hinge)%2C IPR024704 (Structural maintenance of chromosomes protein)%2C IPR027417 (P-loop containing nucleoside triphosphate hydrolase)%3B GO:0005515 (protein binding)%2C GO:0005524 (ATP binding)%2C GO:0005694 (chromosome)%2C GO:0006281 (DNA repair)%2C GO:0006310 (DNA recombination)%2C GO…
Up	Aradu.BG96G	Structural molecule%2C putative n%3D1 Tax%3DRicinus communis RepID%3DB9S880_RICCO%3B IPR006843 (Plastid lipid-associated protein/fibrillin conserved domain)%3B GO:0005198 (structural molecule activity)%2C GO:0009507 (chloroplast)
Up	Aradu.VIL8H	Structural molecule%2C putative n%3D1 Tax%3DRicinus communis RepID%3DB9SS56_RICCO%3B IPR006843 (Plastid lipid-associated protein/fibrillin conserved domain)%3B GO:0005198 (structural molecule activity)%2C GO:0009507 (chloroplast)
Down	Aradu.WQI5W	subtilisin-like protease-like [Glycine max]%3B IPR004263 (Exostosin-like)%2C IPR015500 (Peptidase S8%2C subtilisin-related)%3B GO:0004252 (serine-type endopeptidase activity)%2C GO:0006508 (proteolysis)%2C GO:0042802 (identical protein binding)%2C GO:0043086 (negative regulation of catalytic activity)
Down	Aradu.17B05	subtilisin-like serine protease 2%3B IPR015500 (Peptidase S8%2C subtilisin-related)%2C IPR023828 (Peptidase S8%2C subtilisin%2C Ser-active site)%3B GO:0004252 (serine-type endopeptidase activity)%2C GO:0006508 (proteolysis)%2C GO:0042802 (identical protein binding)%2C GO:0043086 (negative regulation of catalytic activity)
Up	Aradu.U5BRX	subtilisin-like serine protease 2%3B IPR015500 (Peptidase S8%2C subtilisin-related)%3B GO:0004252 (serine-type endopeptidase activity)%2C GO:0006508 (proteolysis)%2C GO:0042802 (identical protein binding)%2C GO:0043086 (negative regulation of catalytic activity)
Down	Aradu.80WBV	subtilisin-like serine protease 2%3B IPR015500 (Peptidase S8%2C subtilisin-related)%3B GO:0004252 (serine-type endopeptidase activity)%2C GO:0006508 (proteolysis)%2C GO:0042802 (identical protein binding)%2C GO:0043086 (negative regulation of catalytic activity)
Down	Aradu.68AHZ	subtilisin-like serine protease 2%3B IPR015500 (Peptidase S8%2C subtilisin-related)%3B GO:0004252 (serine-type endopeptidase activity)%2C GO:0006508 (proteolysis)%2C GO:0042802 (identical protein binding)%2C GO:0043086 (negative regulation of catalytic activity)
Up	Araip.NVE0S	Succinate dehydrogenase assembly factor 2 n%3D6 Tax%3DCamelineae RepID%3DF4KBT8_ARATH%3B IPR005631 (Flavinator of succinate dehydrogenase)
Up	Aradu.Z93ZE	Succinate dehydrogenase assembly factor 2%2C mitochondrial n%3D2 Tax%3DSporidiobolales RepID%3DG0SZC8_RHOG2%3B IPR005631 (Flavinator of succinate dehydrogenase)
Down	Aradu.CR12A	sugar porter (SP) family MFS transporter%3B IPR005828 (General substrate transporter)%2C IPR016196 (Major facilitator superfamily domain%2C general substrate transporter)%3B GO:0005215 (transporter activity)%2C GO:0006810 (transport)%2C GO:0016020 (membrane)%2C GO:0016021 (integral component of membrane)%2C GO:0022857 (transmembrane transporter activity)%2C GO:0022891 (substrate-specific transmem…
Down	Aradu.L5IHI	sugar porter (SP) family MFS transporter%3B IPR005828 (General substrate transporter)%2C IPR016196 (Major facilitator superfamily domain%2C general substrate transporter)%3B GO:0016020 (membrane)%2C GO:0016021 (integral component of membrane)%2C GO:0022857 (transmembrane transporter activity)%2C GO:0022891 (substrate-specific transmembrane transporter activity)%2C GO:0055085 (transmembrane transp…
Up	Aradu.0VM7C	sugar transport protein 13 [Glycine max]%3B IPR001048 (Aspartate/glutamate/uridylate kinase)%2C IPR001057 (Glutamate/acetylglutamate kinase)%2C IPR005828 (General substrate transporter)%2C IPR016196 (Major facilitator superfamily domain%2C general substrate transporter)%3B GO:0004349 (glutamate 5-kinase activity)%2C GO:0005215 (transporter activity)%2C GO:0006561 (proline biosynthetic process)%2C…
Up	Aradu.P8CD0	Sugar transporter SWEET n%3D2 Tax%3DSolanum RepID%3DM1CB29_SOLTU %3B GO:0016021 (integral component of membrane)
Down	Aradu.U6YR6	Sugar transporter SWEET n%3D3 Tax%3DCitrus RepID%3DV4TK53_9ROSI %3B GO:0016021 (integral component of membrane)
Up	Aradu.28KIR	Sugar transporter SWEET n%3D3 Tax%3DPhaseoleae RepID%3DI1MI63_SOYBN %3B GO:0016021 (integral component of membrane)
Down	Aradu.42GVF	Sugar transporter SWEET n%3D3 Tax%3DSolanum RepID%3DM1CBD2_SOLTU %3B GO:0016021 (integral component of membrane)
Down	Aradu.C0F6J	sulfate transporter 1%3B 3%3B IPR001902 (Sulphate anion transporter)%3B GO:0008271 (secondary active sulfate transmembrane transporter activity)%2C GO:0008272 (sulfate transport)%2C GO:0015116 (sulfate transmembrane transporter activity)%2C GO:0016020 (membrane)%2C GO:0016021 (integral component of membrane)%2C GO:0055085 (transmembrane transport)
Down	Aradu.T4VTL	Sulfite exporter TauE/SafE family protein%3B IPR002781 (Transmembrane protein TauE like)%3B GO:0016021 (integral component of membrane)
Down	Aradu.JH5R4	Sulfite exporter TauE/SafE family protein%3B IPR002781 (Transmembrane protein TauE like)%3B GO:0016021 (integral component of membrane)
Up	Aradu.62SF0	sulfotransferase 2A%3B IPR000863 (Sulfotransferase domain)%2C IPR027417 (P-loop containing nucleoside triphosphate hydrolase)%3B GO:0008146 (sulfotransferase activity)
Down	Aradu.FR9WM	sulfotransferase 2A%3B IPR000863 (Sulfotransferase domain)%2C IPR027417 (P-loop containing nucleoside triphosphate hydrolase)%3B GO:0008146 (sulfotransferase activity)
Up	Aradu.1YE7N	sulfurtransferase protein 16%3B IPR001763 (Rhodanese-like domain)
Up	Araip.UTP62	SWI/SNF complex subunit SWI3B-like protein
Up	Aradu.KEG9Z	TAC1 n%3D1 Tax%3DPrunus persica RepID%3DU3MMQ4_PRUPE
Down	Aradu.Y43LN	TCP-1/cpn60 chaperonin family protein%3B IPR002423 (Chaperonin Cpn60/TCP-1)%2C IPR027409 (GroEL-like apical domain)%2C IPR027413 (GroEL-like equatorial domain)%3B GO:0005524 (ATP binding)%2C GO:0005737 (cytoplasm)%2C GO:0042026 (protein refolding)%2C GO:0044267 (cellular protein metabolic process)
Up	Aradu.YTL0F	temperature-induced lipocalin%3B IPR002446 (Lipocalin%2C bacterial)%2C IPR011038 (Calycin-like)%3B GO:0005215 (transporter activity)
Up	Araip.JS32F	temperature-induced lipocalin%3B IPR022271 (Lipocalin%2C ApoD type)%3B GO:0005215 (transporter activity)
Up	Aradu.Y28R7	temperature-induced lipocalin%3B IPR022271 (Lipocalin%2C ApoD type)%3B GO:0005215 (transporter activity)
Down	Aradu.EF5K9	terpene synthase 02%3B IPR008930 (Terpenoid cyclases/protein prenyltransferase alpha-alpha toroid)%2C IPR008949 (Terpenoid synthase)%3B GO:0000287 (magnesium ion binding)%2C GO:0008152 (metabolic process)%2C GO:0010333 (terpene synthase activity)%2C GO:0016829 (lyase activity)
Up	Araip.LU0P7	terpene synthase 02%3B IPR008949 (Terpenoid synthase)%3B GO:0000287 (magnesium ion binding)%2C GO:0010333 (terpene synthase activity)%2C GO:0016829 (lyase activity)
Up	Aradu.KMG0A	terpene synthase 03%3B IPR008930 (Terpenoid cyclases/protein prenyltransferase alpha-alpha toroid)%2C IPR008949 (Terpenoid synthase)%3B GO:0000287 (magnesium ion binding)%2C GO:0008152 (metabolic process)%2C GO:0010333 (terpene synthase activity)%2C GO:0016829 (lyase activity)
Up	Aradu.A8ITS	terpene synthase 03%3B IPR008930 (Terpenoid cyclases/protein prenyltransferase alpha-alpha toroid)%2C IPR008949 (Terpenoid synthase)%3B GO:0000287 (magnesium ion binding)%2C GO:0008152 (metabolic process)%2C GO:0010333 (terpene synthase activity)%2C GO:0016829 (lyase activity)
Down	Araip.D6V1K	terpene synthase 04%3B IPR008930 (Terpenoid cyclases/protein prenyltransferase alpha-alpha toroid)%2C IPR008949 (Terpenoid synthase)%3B GO:0000287 (magnesium ion binding)%2C GO:0008152 (metabolic process)%2C GO:0010333 (terpene synthase activity)%2C GO:0016829 (lyase activity)
Up	Aradu.5CY6X	terpene synthase 14%3B IPR008930 (Terpenoid cyclases/protein prenyltransferase alpha-alpha toroid)%2C IPR008949 (Terpenoid synthase)%3B GO:0000287 (magnesium ion binding)%2C GO:0008152 (metabolic process)%2C GO:0010333 (terpene synthase activity)%2C GO:0016829 (lyase activity)
Down	Aradu.8542F	terpene synthase family%2C metal-binding domain protein%3B IPR008930 (Terpenoid cyclases/protein prenyltransferase alpha-alpha toroid)%2C IPR008949 (Terpenoid synthase)%3B GO:0000287 (magnesium ion binding)%2C GO:0008152 (metabolic process)%2C GO:0010333 (terpene synthase activity)%2C GO:0016829 (lyase activity)
Up	Aradu.SU69Q	tetrapyrrole-binding protein%2C chloroplastic-like [Glycine max]%3B IPR008629 (GUN4-like)
Up	Aradu.DDR40	tetraspanin-10-like [Glycine max]%3B IPR018499 (Tetraspanin/Peripherin)%3B GO:0016021 (integral component of membrane)
Down	Aradu.1H2UR	tetraspanin-3 [Glycine max]%3B IPR018499 (Tetraspanin/Peripherin)%3B GO:0016021 (integral component of membrane)
Down	Araip.M07D2	tetraspanin-3 [Glycine max]%3B IPR018499 (Tetraspanin/Peripherin)%3B GO:0016021 (integral component of membrane)
Down	Araip.LJ117	Tetratricopeptide repeat (TPR)-like superfamily protein%3B IPR011990 (Tetratricopeptide-like helical)%3B GO:0005515 (protein binding)
Up	Aradu.3L3H2	Tetratricopeptide repeat (TPR)-like superfamily protein%3B IPR011990 (Tetratricopeptide-like helical)%3B GO:0005515 (protein binding)
Up	Aradu.1G4QF	Tetratricopeptide repeat (TPR)-like superfamily protein%3B IPR011990 (Tetratricopeptide-like helical)%3B GO:0005515 (protein binding)
Up	Aradu.H8AL3	Tetratricopeptide repeat (TPR)-like superfamily protein%3B IPR011990 (Tetratricopeptide-like helical)%3B GO:0005515 (protein binding)
Up	Aradu.KUN1X	Tetratricopeptide repeat (TPR)-like superfamily protein%3B IPR011990 (Tetratricopeptide-like helical)%3B GO:0005515 (protein binding)
Up	Aradu.FBS3S	Tetratricopeptide repeat (TPR)-like superfamily protein%3B IPR011990 (Tetratricopeptide-like helical)%3B GO:0005515 (protein binding)%2C GO:0005622 (intracellular)%2C GO:0006396 (RNA processing)
Down	Aradu.K2GMJ	Tetratricopeptide repeat (TPR)-like superfamily protein%3B IPR013940 (Meiosis specific protein SPO22)%3B GO:0005515 (protein binding)
Down	Aradu.9CT7A	tetratricopeptide repeat protein 1-like isoform X1 [Glycine max]%3B IPR011990 (Tetratricopeptide-like helical)%3B GO:0005515 (protein binding)
Down	Aradu.LB7E4	tetratricopeptide repeat protein 7A-like isoform X3 [Glycine max]%3B IPR011990 (Tetratricopeptide-like helical)%3B GO:0005515 (protein binding)
Up	Aradu.NJ1ET	Tetratricopeptide repeat protein n%3D1 Tax%3DLeptolyngbya sp. PCC 7375 RepID%3DK9F0R0_9CYAN%3B IPR011990 (Tetratricopeptide-like helical)%3B GO:0005515 (protein binding)
Up	Aradu.80QUL	TGACG-sequence-specific DNA-binding protein TGA-1B n%3D1 Tax%3DMorus notabilis RepID%3DW9SF09_9ROSA%3B IPR004827 (Basic-leucine zipper domain)%3B GO:0003700 (sequence-specific DNA binding transcription factor activity)%2C GO:0043565 (sequence-specific DNA binding)
Down	Aradu.898PR	TGACG-sequence-specific DNA-binding protein TGA-1B-like [Glycine max]%3B IPR004827 (Basic-leucine zipper domain)%3B GO:0003700 (sequence-specific DNA binding transcription factor activity)%2C GO:0043565 (sequence-specific DNA binding)
Down	Araip.HE4VX	TGACG-sequence-specific DNA-binding protein TGA-2.1 isoform X2 [Glycine max]%3B IPR004827 (Basic-leucine zipper domain)%2C IPR025422 (Transcription factor TGA like domain)%3B GO:0003700 (sequence-specific DNA binding transcription factor activity)%2C GO:0043565 (sequence-specific DNA binding)
Up	Aradu.CM60U	TGACG-sequence-specific DNA-binding protein TGA-2.1-like isoform X1 [Glycine max]%3B IPR004827 (Basic-leucine zipper domain)%2C IPR025422 (Transcription factor TGA like domain)%3B GO:0003700 (sequence-specific DNA binding transcription factor activity)%2C GO:0043565 (sequence-specific DNA binding)
Down	Aradu.BQ4IU	TGACG-sequence-specific DNA-binding protein TGA-2.1-like isoform X2 [Glycine max]%3B IPR004827 (Basic-leucine zipper domain)%2C IPR025422 (Transcription factor TGA like domain)%3B GO:0003700 (sequence-specific DNA binding transcription factor activity)%2C GO:0043565 (sequence-specific DNA binding)
Down	Araip.ZQ0IN	thaumatin-like protein 3%3B IPR001938 (Thaumatin)
Up	Aradu.I3F0I	thiamine monophosphate synthase%3B IPR007570 (Uncharacterised protein family Ycf23)%2C IPR013785 (Aldolase-type TIM barrel)%3B GO:0003824 (catalytic activity)
Up	Aradu.0YY6A	thioredoxin 2%3B IPR005746 (Thioredoxin)%2C IPR012336 (Thioredoxin-like fold)%3B GO:0006662 (glycerol ether metabolic process)%2C GO:0015035 (protein disulfide oxidoreductase activity)%2C GO:0045454 (cell redox homeostasis)
Up	Aradu.TES1U	Thioredoxin superfamily protein%3B IPR005746 (Thioredoxin)%2C IPR012336 (Thioredoxin-like fold)%3B GO:0006662 (glycerol ether metabolic process)%2C GO:0015035 (protein disulfide oxidoreductase activity)%2C GO:0045454 (cell redox homeostasis)
Up	Aradu.4M7RM	Thioredoxin superfamily protein%3B IPR005746 (Thioredoxin)%2C IPR012336 (Thioredoxin-like fold)%3B GO:0006662 (glycerol ether metabolic process)%2C GO:0015035 (protein disulfide oxidoreductase activity)%2C GO:0045454 (cell redox homeostasis)
Up	Aradu.EWB3L	Thioredoxin superfamily protein%3B IPR005746 (Thioredoxin)%2C IPR012336 (Thioredoxin-like fold)%3B GO:0006662 (glycerol ether metabolic process)%2C GO:0015035 (protein disulfide oxidoreductase activity)%2C GO:0045454 (cell redox homeostasis)
Up	Aradu.6H8YD	Thioredoxin superfamily protein%3B IPR012336 (Thioredoxin-like fold)
Up	Aradu.J4Y39	thioredoxin X%3B IPR005746 (Thioredoxin)%2C IPR012336 (Thioredoxin-like fold)%3B GO:0006662 (glycerol ether metabolic process)%2C GO:0015035 (protein disulfide oxidoreductase activity)%2C GO:0045454 (cell redox homeostasis)
Up	Aradu.ZBZ36	threonine synthase-like protein%3B IPR001926 (Tryptophan synthase beta subunit-like PLP-dependent enzymes superfamily)%2C IPR004450 (Threonine synthase-like)
Up	Araip.F4E59	thylakoid lumenal 15.0 kDa protein%3B IPR007621 (TPM domain)
Up	Aradu.1ZZ0Q	thylakoid lumenal 17.9 kDa protein%2C chloroplast
Up	Aradu.DB14S	thylakoid lumenal 19 kDa protein%3B IPR002683 (Photosystem II PsbP%2C oxygen evolving complex)%3B GO:0005509 (calcium ion binding)%2C GO:0009523 (photosystem II)%2C GO:0009654 (photosystem II oxygen evolving complex)%2C GO:0015979 (photosynthesis)%2C GO:0019898 (extrinsic component of membrane)
Up	Aradu.9KC1H	thylakoid lumenal P17.1 protein
Up	Aradu.9G0JT	thylakoid membrane phosphoprotein 14 kDa protein%3B IPR025564 (Cyanobacterial aminoacyl-tRNA synthetase%2C CAAD domain)
Up	Aradu.7GQ9E	thylakoid membrane phosphoprotein 14 kDa protein%3B IPR025564 (Cyanobacterial aminoacyl-tRNA synthetase%2C CAAD domain)
Up	Aradu.11KLZ	thylakoid membrane phosphoprotein 14 kDa protein%3B IPR025564 (Cyanobacterial aminoacyl-tRNA synthetase%2C CAAD domain)
Up	Aradu.C5T80	thylakoid soluble phosphoprotein TSP9 protein%3B IPR021584 (Thylakoid soluble phosphoprotein TSP9)
Up	Araip.3Q02H	thylakoid-bound ascorbate peroxidase
Up	Aradu.XD1IH	Tic22-like family protein%3B IPR007378 (Tic22-like)
Up	Aradu.H642L	tonoplast dicarboxylate transporter-like [Glycine max]%3B IPR001898 (Sodium/sulphate symporter)%3B GO:0005215 (transporter activity)%2C GO:0006814 (sodium ion transport)%2C GO:0016020 (membrane)%2C GO:0055085 (transmembrane transport)
Up	Aradu.EG568	TPR repeat protein%3B IPR021883 (Protein of unknown function DUF3493)
Up	Araip.48W26	TPR repeat-containing thioredoxin TTL1-like [Glycine max]%3B IPR011990 (Tetratricopeptide-like helical)%3B GO:0005515 (protein binding)
Up	Aradu.5D1IW	TPR1
Down	Aradu.AKP9L	TPX2 (targeting protein for Xklp2) protein family%3B IPR009675 (TPX2)%2C IPR027329 (TPX2%2C C-terminal domain)%3B GO:0005819 (spindle)%2C GO:0005874 (microtubule)%2C GO:0007067 (mitosis)
Down	Aradu.A6UKY	TPX2 (targeting protein for Xklp2) protein family%3B IPR009675 (TPX2)%2C IPR027329 (TPX2%2C C-terminal domain)%3B GO:0005819 (spindle)%2C GO:0005874 (microtubule)%2C GO:0007067 (mitosis)
Down	Araip.9I797	trafficking protein particle complex subunit-like protein%3B IPR006722 (Sedlin)%3B GO:0005622 (intracellular)%2C GO:0006810 (transport)%2C GO:0006888 (ER to Golgi vesicle-mediated transport)
Down	Aradu.64GLS	trafficking protein particle complex subunit-like protein%3B IPR007233 (Sybindin-like protein)%3B GO:0005801 (cis-Golgi network)%2C GO:0006810 (transport)%2C GO:0006888 (ER to Golgi vesicle-mediated transport)
Down	Aradu.CP0AA	transcription factor
Up	Aradu.PBW5F	transcription factor bHLH123-like isoform X2 [Glycine max]%3B IPR011598 (Myc-type%2C basic helix-loop-helix (bHLH) domain)%3B GO:0046983 (protein dimerization activity)
Up	Aradu.CEP8H	transcription factor bHLH135 [Glycine max]%3B IPR011598 (Myc-type%2C basic helix-loop-helix (bHLH) domain)%3B GO:0046983 (protein dimerization activity)
Up	Aradu.JMP75	transcription factor bHLH135 [Glycine max]%3B IPR011598 (Myc-type%2C basic helix-loop-helix (bHLH) domain)%3B GO:0046983 (protein dimerization activity)
Down	Araip.B07W1	transcription factor bHLH137-like [Glycine max]
Down	Aradu.5E40Q	transcription factor bHLH137-like [Glycine max]%3B IPR011598 (Myc-type%2C basic helix-loop-helix (bHLH) domain)%3B GO:0046983 (protein dimerization activity)
Up	Aradu.YG73I	transcription factor bHLH137-like [Glycine max]%3B IPR011598 (Myc-type%2C basic helix-loop-helix (bHLH) domain)%3B GO:0046983 (protein dimerization activity)
Down	Aradu.Q8Q5Z	transcription factor bHLH13-like [Glycine max]%3B IPR011598 (Myc-type%2C basic helix-loop-helix (bHLH) domain)%2C IPR025610 (Transcription factor MYC/MYB N-terminal)%3B GO:0046983 (protein dimerization activity)
Up	Araip.G8G7Y	transcription factor bHLH25-like [Glycine max]%3B IPR011598 (Myc-type%2C basic helix-loop-helix (bHLH) domain)%3B GO:0046983 (protein dimerization activity)
Down	Aradu.LXV06	transcription factor bHLH30-like [Glycine max]%3B IPR011598 (Myc-type%2C basic helix-loop-helix (bHLH) domain)%3B GO:0046983 (protein dimerization activity)
Down	Aradu.G7446	transcription factor bHLH35-like [Glycine max]
Down	Aradu.M566R	transcription factor bHLH35-like [Glycine max]%3B IPR011598 (Myc-type%2C basic helix-loop-helix (bHLH) domain)%3B GO:0046983 (protein dimerization activity)
Up	Aradu.10L0H	transcription factor bHLH68-like isoform X3 [Glycine max]%3B IPR011598 (Myc-type%2C basic helix-loop-helix (bHLH) domain)%3B GO:0046983 (protein dimerization activity)
Down	Aradu.FE38M	transcription factor EMB1444-like [Glycine max]%3B IPR025610 (Transcription factor MYC/MYB N-terminal)
Up	Aradu.YKL3P	transcription factor ICE1-like [Glycine max]%3B IPR011598 (Myc-type%2C basic helix-loop-helix (bHLH) domain)%3B GO:0046983 (protein dimerization activity)
Up	Aradu.RB7BN	transcription factor PIF3-like [Glycine max]%3B IPR011598 (Myc-type%2C basic helix-loop-helix (bHLH) domain)%3B GO:0046983 (protein dimerization activity)
Up	Aradu.CA8XJ	transcription factor TT8-like [Glycine max]%3B IPR011598 (Myc-type%2C basic helix-loop-helix (bHLH) domain)%2C IPR025610 (Transcription factor MYC/MYB N-terminal)%3B GO:0046983 (protein dimerization activity)
Down	Aradu.DN3DB	transcriptional regulator STERILE APETALA-like [Glycine max]%3B IPR015943 (WD40/YVTN repeat-like-containing domain)%3B GO:0005515 (protein binding)
Up	Aradu.G8WIE	Transducin/WD40 repeat-like superfamily protein%3B IPR015943 (WD40/YVTN repeat-like-containing domain)%2C IPR020472 (G-protein beta WD-40 repeat)%3B GO:0005515 (protein binding)
Up	Aradu.3VD4A	Transducin/WD40 repeat-like superfamily protein%3B IPR015943 (WD40/YVTN repeat-like-containing domain)%2C IPR020472 (G-protein beta WD-40 repeat)%3B GO:0005515 (protein binding)
[truncated: 431 more rows]

## Sheet: S1-S3
The change of S1 relative to S3	gene ID	gene annotation
[truncated: 3,169 more rows]

## Sheet: S2-S3
The change of S2 relative to S3	gene ID	gene annotation
[truncated: 1,849 more rows]
