# Supplementary material for: Global Methylome and gene expression analysis during early Peanut pod development
Source: BMC Plant Biol. 2018 Dec 13;18:352. doi: 10.1186/s12870-018-1546-4 (PMC6293580; doi:10.1186/s12870-018-1546-4)
Supplement: Supplementary file 5 — Table S5. Differentially methylated and expressed genes. The type “Exp” represent information of gene expression, and “Meth” represent information of gene DNA methylation. (XLS 115 kb) [file 12870_2018_1546_MOESM5_ESM.xls]

## Sheet: S1-S2
Differentially methylated and expressed genes
Type	logFC	The change of S1 relative to S2	PValue	ID	ANNO
Exp	-3.10685	Down	6.61e-05	Aradu.0Q24I	Calmodulin binding protein-like%3B IPR012416 (Calmodulin binding protein-like)
Meth	1.46104	Up	0.00288747	Aradu.0Q24I_UP	Calmodulin binding protein-like%3B IPR012416 (Calmodulin binding protein-like)
Exp	-0.308855	Down	0.000459818	Aradu.1IM7V	P-loop containing nucleoside triphosphate hydrolases superfamily protein%3B IPR027417 (P-loop containing nucleoside triphosphate hydrolase)%3B GO:0000166 (nucleotide binding)%2C GO:0005524 (ATP binding)%2C GO:0017111 (nucleoside-triphosphatase activity)
Meth	-0.79872	Down	0.001668	Aradu.1IM7V_DOWN	P-loop containing nucleoside triphosphate hydrolases superfamily protein%3B IPR027417 (P-loop containing nucleoside triphosphate hydrolase)%3B GO:0000166 (nucleotide binding)%2C GO:0005524 (ATP binding)%2C GO:0017111 (nucleoside-triphosphatase activity)
Exp	0.62447	Up	4.13e-14	Aradu.1Q3JN	UDP-Glycosyltransferase superfamily protein%3B IPR002213 (UDP-glucuronosyl/UDP-glucosyltransferase)%3B GO:0008152 (metabolic process)
Meth	1.04455	Up	0.00318347	Aradu.1Q3JN	UDP-Glycosyltransferase superfamily protein%3B IPR002213 (UDP-glucuronosyl/UDP-glucosyltransferase)%3B GO:0008152 (metabolic process)
Exp	-0.65902	Down	0.000128904	Aradu.1XJ5E	putative glucuronosyltransferase PGSIP8-like [Glycine max]%3B IPR002495 (Glycosyl transferase%2C family 8)
Meth	-2.53733	Down	0.0129397	Aradu.1XJ5E_DOWN	putative glucuronosyltransferase PGSIP8-like [Glycine max]%3B IPR002495 (Glycosyl transferase%2C family 8)
Exp	-0.298164	Down	0.00358264	Aradu.3J25S	magnesium transporter 9%3B IPR026573 (Magnesium transporter MRS2/LPE10)%3B GO:0015095 (magnesium ion transmembrane transporter activity)%2C GO:0015693 (magnesium ion transport)
Meth	-0.235356	Down	0.000228643	Aradu.3J25S_UP	magnesium transporter 9%3B IPR026573 (Magnesium transporter MRS2/LPE10)%3B GO:0015095 (magnesium ion transmembrane transporter activity)%2C GO:0015693 (magnesium ion transport)
Exp	0.37807	Up	2.99e-06	Aradu.3NM3A	poly(A) polymerase 2%3B IPR014492 (Poly(A) polymerase)%3B GO:0003723 (RNA binding)%2C GO:0004652 (polynucleotide adenylyltransferase activity)%2C GO:0005634 (nucleus)%2C GO:0016779 (nucleotidyltransferase activity)%2C GO:0031123 (RNA 3'-end processing)%2C GO:0043631 (RNA polyadenylation)
Meth	-0.28428	Down	0.0425571	Aradu.3NM3A_DOWN	poly(A) polymerase 2%3B IPR014492 (Poly(A) polymerase)%3B GO:0003723 (RNA binding)%2C GO:0004652 (polynucleotide adenylyltransferase activity)%2C GO:0005634 (nucleus)%2C GO:0016779 (nucleotidyltransferase activity)%2C GO:0031123 (RNA 3'-end processing)%2C GO:0043631 (RNA polyadenylation)
Exp	-0.690906	Down	4.44e-13	Aradu.4VI0G	uncharacterized protein LOC100793067 isoform X4 [Glycine max]
Meth	0.849607	Up	0.0488761	Aradu.4VI0G_UP	uncharacterized protein LOC100793067 isoform X4 [Glycine max]
Exp	0.871954	Up	9.3e-19	Aradu.65NZB	GTP binding Elongation factor Tu family protein%3B IPR005225 (Small GTP-binding protein domain)%2C IPR006297 (Elongation factor 4)%2C IPR027417 (P-loop containing nucleoside triphosphate hydrolase)%3B GO:0003924 (GTPase activity)%2C GO:0005525 (GTP binding)
Meth	-0.186038	Down	0.0212322	Aradu.65NZB_UP	GTP binding Elongation factor Tu family protein%3B IPR005225 (Small GTP-binding protein domain)%2C IPR006297 (Elongation factor 4)%2C IPR027417 (P-loop containing nucleoside triphosphate hydrolase)%3B GO:0003924 (GTPase activity)%2C GO:0005525 (GTP binding)
Exp	0.743879	Up	2.87e-11	Aradu.76H6A	magnesium (Mg) transporter 10%3B IPR002523 (Mg2+ transporter protein%2C CorA-like/Zinc transport protein ZntB)%2C IPR026573 (Magnesium transporter MRS2/LPE10)%3B GO:0015095 (magnesium ion transmembrane transporter activity)%2C GO:0015693 (magnesium ion transport)%2C GO:0016020 (membrane)%2C GO:0030001 (metal ion transport)%2C GO:0046873 (metal ion transmembrane transporter activity)%2C GO:0055085…
Meth	0.279598	Up	0.0205264	Aradu.76H6A_DOWN	magnesium (Mg) transporter 10%3B IPR002523 (Mg2+ transporter protein%2C CorA-like/Zinc transport protein ZntB)%2C IPR026573 (Magnesium transporter MRS2/LPE10)%3B GO:0015095 (magnesium ion transmembrane transporter activity)%2C GO:0015693 (magnesium ion transport)%2C GO:0016020 (membrane)%2C GO:0030001 (metal ion transport)%2C GO:0046873 (metal ion transmembrane transporter activity)%2C GO:0055085…
Exp	-0.258524	Down	0.000844609	Aradu.7BZ8V	protein FAM91A1-like isoform X1 [Glycine max]%3B IPR028091 (FAM91%2C N-terminal domain)%2C IPR028097 (FAM91%2C C-terminal domain)
Meth	-0.427696	Down	1.7e-07	Aradu.7BZ8V_UP	protein FAM91A1-like isoform X1 [Glycine max]%3B IPR028091 (FAM91%2C N-terminal domain)%2C IPR028097 (FAM91%2C C-terminal domain)
Exp	-0.937652	Down	4.97e-10	Aradu.8Z4L7	alpha/beta-Hydrolases superfamily protein%3B IPR000073 (Alpha/beta hydrolase fold-1)
Meth	0.504985	Up	0.0227726	Aradu.8Z4L7_UP	alpha/beta-Hydrolases superfamily protein%3B IPR000073 (Alpha/beta hydrolase fold-1)
Exp	3.35208	Up	1.63e-290	Aradu.B353U	23kDa polypeptide of the oxygen evolving complex of photosystem II n%3D5 Tax%3DSonneratia RepID%3DA9XNJ0_9MYRT%3B IPR002683 (Photosystem II PsbP%2C oxygen evolving complex)%3B GO:0005509 (calcium ion binding)%2C GO:0009523 (photosystem II)%2C GO:0009654 (photosystem II oxygen evolving complex)%2C GO:0015979 (photosynthesis)%2C GO:0019898 (extrinsic component of membrane)
Meth	0.754492	Up	0.00683289	Aradu.B353U	23kDa polypeptide of the oxygen evolving complex of photosystem II n%3D5 Tax%3DSonneratia RepID%3DA9XNJ0_9MYRT%3B IPR002683 (Photosystem II PsbP%2C oxygen evolving complex)%3B GO:0005509 (calcium ion binding)%2C GO:0009523 (photosystem II)%2C GO:0009654 (photosystem II oxygen evolving complex)%2C GO:0015979 (photosynthesis)%2C GO:0019898 (extrinsic component of membrane)
Exp	-0.901164	Down	1.88e-05	Aradu.B4Z82	acyl thioesterase-like protein%3B IPR003140 (Phospholipase/carboxylesterase/thioesterase)%3B GO:0016787 (hydrolase activity)
Meth	0.851397	Up	0.00507825	Aradu.B4Z82	acyl thioesterase-like protein%3B IPR003140 (Phospholipase/carboxylesterase/thioesterase)%3B GO:0016787 (hydrolase activity)
Exp	-0.251947	Down	0.00133821	Aradu.BW225	Protein kinase superfamily protein%3B IPR011009 (Protein kinase-like domain)%3B GO:0004672 (protein kinase activity)%2C GO:0005524 (ATP binding)%2C GO:0006468 (protein phosphorylation)
Meth	-0.341098	Down	0.0360221	Aradu.BW225_UP	Protein kinase superfamily protein%3B IPR011009 (Protein kinase-like domain)%3B GO:0004672 (protein kinase activity)%2C GO:0005524 (ATP binding)%2C GO:0006468 (protein phosphorylation)
Exp	-0.326919	Down	0.00022145	Aradu.CE5SH	GTP-binding elongation factor Tu family protein%3B IPR000795 (Elongation factor%2C GTP-binding domain)%2C IPR005225 (Small GTP-binding protein domain)%2C IPR009000 (Translation protein%2C beta-barrel domain)%2C IPR009001 (Translation elongation factor EF1A/initiation factor IF2gamma%2C C-terminal)%2C IPR027417 (P-loop containing nucleoside triphosphate hydrolase)%3B GO:0003924 (GTPase activity)%2…
Meth	-0.317733	Down	0.0159777	Aradu.CE5SH_UP	GTP-binding elongation factor Tu family protein%3B IPR000795 (Elongation factor%2C GTP-binding domain)%2C IPR005225 (Small GTP-binding protein domain)%2C IPR009000 (Translation protein%2C beta-barrel domain)%2C IPR009001 (Translation elongation factor EF1A/initiation factor IF2gamma%2C C-terminal)%2C IPR027417 (P-loop containing nucleoside triphosphate hydrolase)%3B GO:0003924 (GTPase activity)%2…
Exp	-0.736919	Down	0.00106116	Aradu.CLF8Y	caffeoyl-CoA 3-O-methyltransferase%3B IPR002935 (O-methyltransferase%2C family 3)%3B GO:0008171 (O-methyltransferase activity)
Meth	-0.450682	Down	0.182084	Aradu.CLF8Y	caffeoyl-CoA 3-O-methyltransferase%3B IPR002935 (O-methyltransferase%2C family 3)%3B GO:0008171 (O-methyltransferase activity)
Meth	-0.418613	Down	8.64e-05	Aradu.CLF8Y_DOWN	caffeoyl-CoA 3-O-methyltransferase%3B IPR002935 (O-methyltransferase%2C family 3)%3B GO:0008171 (O-methyltransferase activity)
Exp	-0.992946	Down	8.82e-05	Aradu.CU1UG	pfkB-like carbohydrate kinase family protein%3B IPR002139 (Ribokinase)%3B GO:0004747 (ribokinase activity)%2C GO:0006014 (D-ribose metabolic process)
Meth	0.453698	Up	0.00388747	Aradu.CU1UG_DOWN	pfkB-like carbohydrate kinase family protein%3B IPR002139 (Ribokinase)%3B GO:0004747 (ribokinase activity)%2C GO:0006014 (D-ribose metabolic process)
Exp	-0.61179	Down	0.000231938	Aradu.DB4LT	Protein phosphatase 2C family protein%3B IPR001932 (Protein phosphatase 2C (PP2C)-like domain)%2C IPR015655 (Protein phosphatase 2C)%3B GO:0003824 (catalytic activity)
Meth	0.455759	Up	1.4e-07	Aradu.DB4LT_DOWN	Protein phosphatase 2C family protein%3B IPR001932 (Protein phosphatase 2C (PP2C)-like domain)%2C IPR015655 (Protein phosphatase 2C)%3B GO:0003824 (catalytic activity)
Exp	1.95552	Up	5.7e-34	Aradu.DY6GW	phytosulfokines 3 [Glycine max]%3B IPR009438 (Phytosulfokine)%3B GO:0005576 (extracellular region)%2C GO:0008083 (growth factor activity)%2C GO:0008283 (cell proliferation)
Meth	1.5954	Up	0.00145061	Aradu.DY6GW	phytosulfokines 3 [Glycine max]%3B IPR009438 (Phytosulfokine)%3B GO:0005576 (extracellular region)%2C GO:0008083 (growth factor activity)%2C GO:0008283 (cell proliferation)
Exp	1.95401	Up	1.19e-22	Aradu.E2WKW	uncharacterized protein LOC100527109 [Glycine max]
Meth	1.92097	Up	0.00407749	Aradu.E2WKW_UP	uncharacterized protein LOC100527109 [Glycine max]
Exp	-0.61629	Down	1.33e-09	Aradu.E5KC4	microtubule-associated protein TORTIFOLIA1-like isoform X1 [Glycine max]%3B IPR016024 (Armadillo-type fold)%3B GO:0005488 (binding)
Meth	0.802992	Up	0.0463562	Aradu.E5KC4	microtubule-associated protein TORTIFOLIA1-like isoform X1 [Glycine max]%3B IPR016024 (Armadillo-type fold)%3B GO:0005488 (binding)
Exp	-0.226631	Down	0.00326726	Aradu.E80AX	cation-transporting ATPase%2C putative%3B IPR001757 (Cation-transporting P-type ATPase)%2C IPR023214 (HAD-like domain)%3B GO:0000166 (nucleotide binding)%2C GO:0006812 (cation transport)%2C GO:0016021 (integral component of membrane)%2C GO:0016887 (ATPase activity)%2C GO:0019829 (cation-transporting ATPase activity)%2C GO:0046872 (metal ion binding)
Meth	-1.04662	Down	0.0258974	Aradu.E80AX_DOWN	cation-transporting ATPase%2C putative%3B IPR001757 (Cation-transporting P-type ATPase)%2C IPR023214 (HAD-like domain)%3B GO:0000166 (nucleotide binding)%2C GO:0006812 (cation transport)%2C GO:0016021 (integral component of membrane)%2C GO:0016887 (ATPase activity)%2C GO:0019829 (cation-transporting ATPase activity)%2C GO:0046872 (metal ion binding)
Exp	2.8207	Up	2.97e-29	Aradu.EG568	TPR repeat protein%3B IPR021883 (Protein of unknown function DUF3493)
Meth	-0.560079	Down	0.0121411	Aradu.EG568	TPR repeat protein%3B IPR021883 (Protein of unknown function DUF3493)
Exp	0.483363	Up	4.98e-09	Aradu.EGV3U	nucleoside diphosphate kinase 2%3B IPR001564 (Nucleoside diphosphate kinase)%3B GO:0004550 (nucleoside diphosphate kinase activity)%2C GO:0005524 (ATP binding)%2C GO:0006165 (nucleoside diphosphate phosphorylation)%2C GO:0006183 (GTP biosynthetic process)%2C GO:0006228 (UTP biosynthetic process)%2C GO:0006241 (CTP biosynthetic process)
Meth	0.836737	Up	0.0355851	Aradu.EGV3U	nucleoside diphosphate kinase 2%3B IPR001564 (Nucleoside diphosphate kinase)%3B GO:0004550 (nucleoside diphosphate kinase activity)%2C GO:0005524 (ATP binding)%2C GO:0006165 (nucleoside diphosphate phosphorylation)%2C GO:0006183 (GTP biosynthetic process)%2C GO:0006228 (UTP biosynthetic process)%2C GO:0006241 (CTP biosynthetic process)
Exp	-0.351393	Down	0.000389351	Aradu.F5NV3	Core-2/I-branching beta-1%2C6-N-acetylglucosaminyltransferase family protein%3B IPR003406 (Glycosyl transferase%2C family 14)%3B GO:0008375 (acetylglucosaminyltransferase activity)%2C GO:0016020 (membrane)
Meth	0.290953	Up	0.0345912	Aradu.F5NV3_DOWN	Core-2/I-branching beta-1%2C6-N-acetylglucosaminyltransferase family protein%3B IPR003406 (Glycosyl transferase%2C family 14)%3B GO:0008375 (acetylglucosaminyltransferase activity)%2C GO:0016020 (membrane)
Exp	0.608434	Up	6.3e-06	Aradu.F8HCE	Orf214 n%3D2 Tax%3DGlycine max RepID%3DQ01925_SOYBN
Meth	0.641253	Up	0.0133828	Aradu.F8HCE	Orf214 n%3D2 Tax%3DGlycine max RepID%3DQ01925_SOYBN
Exp	0.841275	Up	1.08e-16	Aradu.FU9VU	UDP-Glycosyltransferase superfamily protein%3B IPR002213 (UDP-glucuronosyl/UDP-glucosyltransferase)%3B GO:0008152 (metabolic process)
Meth	-0.192024	Down	0.0681628	Aradu.FU9VU_DOWN	UDP-Glycosyltransferase superfamily protein%3B IPR002213 (UDP-glucuronosyl/UDP-glucosyltransferase)%3B GO:0008152 (metabolic process)
Meth	-0.373537	Down	1.63e-05	Aradu.FU9VU	UDP-Glycosyltransferase superfamily protein%3B IPR002213 (UDP-glucuronosyl/UDP-glucosyltransferase)%3B GO:0008152 (metabolic process)
Exp	2.8087	Up	1.09e-140	Aradu.G2902	short-chain dehydrogenase-reductase B%3B IPR002347 (Glucose/ribitol dehydrogenase)%3B GO:0008152 (metabolic process)%2C GO:0016491 (oxidoreductase activity)
Meth	0.358698	Up	0.00568526	Aradu.G2902_DOWN	short-chain dehydrogenase-reductase B%3B IPR002347 (Glucose/ribitol dehydrogenase)%3B GO:0008152 (metabolic process)%2C GO:0016491 (oxidoreductase activity)
Exp	0.899885	Up	7.64e-25	Aradu.G4UPX	DNA-binding protein n%3D1 Tax%3DCatharanthus roseus RepID%3DA1DR78_CATRO%3B IPR003106 (Leucine zipper%2C homeobox-associated)%2C IPR009057 (Homeodomain-like)%3B GO:0000976 (transcription regulatory region sequence-specific DNA binding)%2C GO:0003677 (DNA binding)%2C GO:0003700 (sequence-specific DNA binding transcription factor activity)%2C GO:0005634 (nucleus)%2C GO:0043565 (sequence-specific DN…
Meth	-0.476056	Down	0.0031181	Aradu.G4UPX_DOWN	DNA-binding protein n%3D1 Tax%3DCatharanthus roseus RepID%3DA1DR78_CATRO%3B IPR003106 (Leucine zipper%2C homeobox-associated)%2C IPR009057 (Homeodomain-like)%3B GO:0000976 (transcription regulatory region sequence-specific DNA binding)%2C GO:0003677 (DNA binding)%2C GO:0003700 (sequence-specific DNA binding transcription factor activity)%2C GO:0005634 (nucleus)%2C GO:0043565 (sequence-specific DN…
Exp	-3.25768	Down	4.38e-18	Aradu.GR5W9	pectinesterase family protein%3B IPR011050 (Pectin lyase fold/virulence factor)%3B GO:0005618 (cell wall)%2C GO:0030599 (pectinesterase activity)%2C GO:0042545 (cell wall modification)
Meth	-0.523138	Down	0.0025945	Aradu.GR5W9_UP	pectinesterase family protein%3B IPR011050 (Pectin lyase fold/virulence factor)%3B GO:0005618 (cell wall)%2C GO:0030599 (pectinesterase activity)%2C GO:0042545 (cell wall modification)
Exp	2.86251	Up	8.53e-157	Aradu.H9EEY	protein TIC 62%2C chloroplastic-like isoform X2 [Glycine max]%3B IPR016040 (NAD(P)-binding domain)
Meth	-0.305605	Down	0.0322992	Aradu.H9EEY_DOWN	protein TIC 62%2C chloroplastic-like isoform X2 [Glycine max]%3B IPR016040 (NAD(P)-binding domain)
Exp	-3.41991	Down	0.000976944	Aradu.HBW24	uncharacterized protein LOC100782361 isoform X5 [Glycine max]%3B IPR009836 (Protein of unknown function DUF1399)
Meth	0.84118	Up	0.0294957	Aradu.HBW24_DOWN	uncharacterized protein LOC100782361 isoform X5 [Glycine max]%3B IPR009836 (Protein of unknown function DUF1399)
Exp	1.57237	Up	3.79e-34	Aradu.IZ11Y	30S ribosomal protein%2C putative%3B IPR003489 (Ribosomal protein S30Ae/sigma 54 modulation protein)%3B GO:0044238 (primary metabolic process)
Meth	1.07443	Up	0.02263	Aradu.IZ11Y	30S ribosomal protein%2C putative%3B IPR003489 (Ribosomal protein S30Ae/sigma 54 modulation protein)%3B GO:0044238 (primary metabolic process)
Exp	0.455923	Up	9.36e-07	Aradu.JP0ZJ	peptide transporter 3%3B IPR000109 (Proton-dependent oligopeptide transporter family)%2C IPR016196 (Major facilitator superfamily domain%2C general substrate transporter)%3B GO:0005215 (transporter activity)%2C GO:0006810 (transport)%2C GO:0016020 (membrane)
Meth	0.515824	Up	0.00401008	Aradu.JP0ZJ	peptide transporter 3%3B IPR000109 (Proton-dependent oligopeptide transporter family)%2C IPR016196 (Major facilitator superfamily domain%2C general substrate transporter)%3B GO:0005215 (transporter activity)%2C GO:0006810 (transport)%2C GO:0016020 (membrane)
Exp	2.00136	Up	1.96e-58	Aradu.JX29L	UDP-Glycosyltransferase superfamily protein%3B IPR002213 (UDP-glucuronosyl/UDP-glucosyltransferase)%3B GO:0008152 (metabolic process)
Meth	0.878032	Up	2.47e-05	Aradu.JX29L	UDP-Glycosyltransferase superfamily protein%3B IPR002213 (UDP-glucuronosyl/UDP-glucosyltransferase)%3B GO:0008152 (metabolic process)
Exp	-1.05421	Down	8.39e-21	Aradu.K7HSH	uncharacterized protein LOC100816026 isoform X1 [Glycine max]
Meth	0.295086	Up	0.0442986	Aradu.K7HSH_UP	uncharacterized protein LOC100816026 isoform X1 [Glycine max]
Exp	2.72642	Up	1.28e-42	Aradu.KTD39	NAD-dependent epimerase/dehydratase n%3D1 Tax%3DNostoc sp. PCC 7107 RepID%3DK9QIR6_9NOSO%3B IPR001509 (NAD-dependent epimerase/dehydratase)%2C IPR016040 (NAD(P)-binding domain)%3B GO:0003824 (catalytic activity)%2C GO:0044237 (cellular metabolic process)%2C GO:0050662 (coenzyme binding)
Meth	-0.320012	Down	2.08e-05	Aradu.KTD39_UP	NAD-dependent epimerase/dehydratase n%3D1 Tax%3DNostoc sp. PCC 7107 RepID%3DK9QIR6_9NOSO%3B IPR001509 (NAD-dependent epimerase/dehydratase)%2C IPR016040 (NAD(P)-binding domain)%3B GO:0003824 (catalytic activity)%2C GO:0044237 (cellular metabolic process)%2C GO:0050662 (coenzyme binding)
Exp	-0.620631	Down	6.98e-05	Aradu.LFL4V	dual specificity protein kinase shkD-like [Glycine max]
Meth	0.578544	Up	3.01e-07	Aradu.LFL4V_UP	dual specificity protein kinase shkD-like [Glycine max]
Exp	-0.320853	Down	0.000659617	Aradu.LR2WR	organellar single-stranded DNA binding protein 3%3B IPR000424 (Primosome PriB/single-strand DNA-binding)%3B GO:0003697 (single-stranded DNA binding)
Meth	-2.21511	Down	3.39e-06	Aradu.LR2WR_DOWN	organellar single-stranded DNA binding protein 3%3B IPR000424 (Primosome PriB/single-strand DNA-binding)%3B GO:0003697 (single-stranded DNA binding)
Exp	2.88154	Up	2.92e-22	Aradu.M3XI9	GDSL-like Lipase/Acylhydrolase superfamily protein%3B IPR001087 (Lipase%2C GDSL)%3B GO:0006629 (lipid metabolic process)%2C GO:0016787 (hydrolase activity)
Meth	0.330135	Up	0.0206768	Aradu.M3XI9_UP	GDSL-like Lipase/Acylhydrolase superfamily protein%3B IPR001087 (Lipase%2C GDSL)%3B GO:0006629 (lipid metabolic process)%2C GO:0016787 (hydrolase activity)
Exp	-0.247612	Down	0.00221956	Aradu.M4PQ9	probable methyltransferase PMT5-like isoform X2 [Glycine max]%3B IPR004159 (Putative S-adenosyl-L-methionine-dependent methyltransferase)%3B GO:0008168 (methyltransferase activity)
Meth	0.515768	Up	0.038185	Aradu.M4PQ9_DOWN	probable methyltransferase PMT5-like isoform X2 [Glycine max]%3B IPR004159 (Putative S-adenosyl-L-methionine-dependent methyltransferase)%3B GO:0008168 (methyltransferase activity)
Exp	-0.216128	Down	0.0296466	Aradu.M530F	set1/Ash2 histone methyltransferase complex subunit ASH2-like [Glycine max]%3B IPR003877 (SPla/RYanodine receptor SPRY)%2C IPR008985 (Concanavalin A-like lectin/glucanases superfamily)%3B GO:0005515 (protein binding)
Meth	0.213396	Up	0.03885	Aradu.M530F	set1/Ash2 histone methyltransferase complex subunit ASH2-like [Glycine max]%3B IPR003877 (SPla/RYanodine receptor SPRY)%2C IPR008985 (Concanavalin A-like lectin/glucanases superfamily)%3B GO:0005515 (protein binding)
Exp	-0.605791	Down	0.00653682	Aradu.M6A79	Pentatricopeptide repeat (PPR) superfamily protein%3B IPR002885 (Pentatricopeptide repeat)
Meth	0.660005	Up	0.0250244	Aradu.M6A79_UP	Pentatricopeptide repeat (PPR) superfamily protein%3B IPR002885 (Pentatricopeptide repeat)
Exp	0.820585	Up	4.97e-26	Aradu.MH1AP	aldose 1-epimerase [Glycine max]%3B IPR008183 (Aldose 1-/Glucose-6-phosphate 1-epimerase)%2C IPR011013 (Galactose mutarotase-like domain)%3B GO:0003824 (catalytic activity)%2C GO:0005975 (carbohydrate metabolic process)%2C GO:0016853 (isomerase activity)%2C GO:0019318 (hexose metabolic process)%2C GO:0030246 (carbohydrate binding)
Meth	0.438176	Up	3.65e-05	Aradu.MH1AP_DOWN	aldose 1-epimerase [Glycine max]%3B IPR008183 (Aldose 1-/Glucose-6-phosphate 1-epimerase)%2C IPR011013 (Galactose mutarotase-like domain)%3B GO:0003824 (catalytic activity)%2C GO:0005975 (carbohydrate metabolic process)%2C GO:0016853 (isomerase activity)%2C GO:0019318 (hexose metabolic process)%2C GO:0030246 (carbohydrate binding)
Exp	-0.391513	Down	0.000737791	Aradu.MRJ6D	dof zinc finger protein DOF5.6-like [Glycine max]%3B IPR003851 (Zinc finger%2C Dof-type)%3B GO:0003677 (DNA binding)
Meth	-0.274522	Down	0.0322275	Aradu.MRJ6D_UP	dof zinc finger protein DOF5.6-like [Glycine max]%3B IPR003851 (Zinc finger%2C Dof-type)%3B GO:0003677 (DNA binding)
Exp	0.868411	Up	3.84e-23	Aradu.P7SHR	Ribosomal protein PSRP-3/Ycf65%3B IPR006924 (Ribosomal protein PSRP-3/Ycf65)%3B GO:0003735 (structural constituent of ribosome)%2C GO:0005840 (ribosome)%2C GO:0006412 (translation)
Meth	-0.535234	Down	0.0465339	Aradu.P7SHR	Ribosomal protein PSRP-3/Ycf65%3B IPR006924 (Ribosomal protein PSRP-3/Ycf65)%3B GO:0003735 (structural constituent of ribosome)%2C GO:0005840 (ribosome)%2C GO:0006412 (translation)
Exp	-0.467688	Down	2.13e-05	Aradu.Q7U61	protein kinase family protein%3B IPR024788 (Malectin-like carbohydrate-binding domain)
Meth	-0.597893	Down	3.05e-07	Aradu.Q7U61_UP	protein kinase family protein%3B IPR024788 (Malectin-like carbohydrate-binding domain)
Exp	-2.69974	Down	0.0390667	Aradu.QIJ36	serine/threonine-protein phosphatase 7 long form homolog [Glycine max]%3B IPR019557 (Aminotransferase-like%2C plant mobile domain)
Meth	0.29987	Up	0.000112974	Aradu.QIJ36	serine/threonine-protein phosphatase 7 long form homolog [Glycine max]%3B IPR019557 (Aminotransferase-like%2C plant mobile domain)
Exp	-0.414093	Down	1.3e-07	Aradu.QS326	uncharacterized protein LOC100795977 isoform X2 [Glycine max]
Meth	-0.361971	Down	0.000195642	Aradu.QS326_DOWN	uncharacterized protein LOC100795977 isoform X2 [Glycine max]
Exp	-0.592251	Down	3.4e-10	Aradu.R35Q8	Ankyrin repeat family protein%3B IPR020683 (Ankyrin repeat-containing domain)%3B GO:0005515 (protein binding)
Meth	0.985177	Up	0.0470326	Aradu.R35Q8_UP	Ankyrin repeat family protein%3B IPR020683 (Ankyrin repeat-containing domain)%3B GO:0005515 (protein binding)
Exp	1.08712	Up	5.51e-43	Aradu.RFT1Y	Alkyl hydroperoxide reductase Thiol specific antioxidant Mal allergen and Peroxiredoxin domain containing protein n%3D4 Tax%3DStrongylida RepID%3DU6NTW3_HAECO%3B IPR012336 (Thioredoxin-like fold)%3B GO:0016209 (antioxidant activity)%2C GO:0016491 (oxidoreductase activity)%2C GO:0051920 (peroxiredoxin activity)%2C GO:0055114 (oxidation-reduction process)
Meth	-0.931939	Down	0.00855545	Aradu.RFT1Y	Alkyl hydroperoxide reductase Thiol specific antioxidant Mal allergen and Peroxiredoxin domain containing protein n%3D4 Tax%3DStrongylida RepID%3DU6NTW3_HAECO%3B IPR012336 (Thioredoxin-like fold)%3B GO:0016209 (antioxidant activity)%2C GO:0016491 (oxidoreductase activity)%2C GO:0051920 (peroxiredoxin activity)%2C GO:0055114 (oxidation-reduction process)
Exp	-1.65539	Down	3.37e-35	Aradu.RW69W	fatty acid amide hydrolase-like [Glycine max]%3B IPR000120 (Amidase)%2C IPR023631 (Amidase signature domain)
Meth	-1.75367	Down	0.00935566	Aradu.RW69W_UP	fatty acid amide hydrolase-like [Glycine max]%3B IPR000120 (Amidase)%2C IPR023631 (Amidase signature domain)
Exp	3.23398	Up	2.01e-232	Aradu.SGR1V	light-harvesting chlorophyll B-binding protein 3%3B IPR022796 (Chlorophyll A-B binding protein)%2C IPR023329 (Chlorophyll a/b binding protein domain)%3B GO:0016020 (membrane)
Meth	-0.407218	Down	0.00624804	Aradu.SGR1V	light-harvesting chlorophyll B-binding protein 3%3B IPR022796 (Chlorophyll A-B binding protein)%2C IPR023329 (Chlorophyll a/b binding protein domain)%3B GO:0016020 (membrane)
Exp	-0.258756	Down	0.00286322	Aradu.SGU0V	E3 ubiquitin-protein ligase RGLG2-like isoform X2 [Glycine max]%3B IPR000008 (C2 domain)%2C IPR002035 (von Willebrand factor%2C type A)%2C IPR010734 (Copine)%3B GO:0005515 (protein binding)
Meth	-0.366984	Down	1.17e-05	Aradu.SGU0V_UP	E3 ubiquitin-protein ligase RGLG2-like isoform X2 [Glycine max]%3B IPR000008 (C2 domain)%2C IPR002035 (von Willebrand factor%2C type A)%2C IPR010734 (Copine)%3B GO:0005515 (protein binding)
Exp	-0.312647	Down	0.000151091	Aradu.TRD0U	Regulator of chromosome condensation (RCC1) family protein%3B IPR009091 (Regulator of chromosome condensation 1/beta-lactamase-inhibitor protein II)
Meth	-0.280356	Down	0.000978293	Aradu.TRD0U_UP	Regulator of chromosome condensation (RCC1) family protein%3B IPR009091 (Regulator of chromosome condensation 1/beta-lactamase-inhibitor protein II)
Exp	-0.278567	Down	0.00593394	Aradu.TW0A0	Ribosomal protein L35
Meth	1.24578	Up	0.0115084	Aradu.TW0A0_DOWN	Ribosomal protein L35
Exp	1.27491	Up	7.58e-35	Aradu.V3CWF	2-oxoglutarate (2OG) and Fe(II)-dependent oxygenase superfamily protein%3B IPR005123 (Oxoglutarate/iron-dependent dioxygenase)%2C IPR026992 (Non-haem dioxygenase N-terminal domain)%2C IPR027443 (Isopenicillin N synthase-like)%3B GO:0016491 (oxidoreductase activity)%2C GO:0055114 (oxidation-reduction process)
Meth	0.531446	Up	0.02241	Aradu.V3CWF_UP	2-oxoglutarate (2OG) and Fe(II)-dependent oxygenase superfamily protein%3B IPR005123 (Oxoglutarate/iron-dependent dioxygenase)%2C IPR026992 (Non-haem dioxygenase N-terminal domain)%2C IPR027443 (Isopenicillin N synthase-like)%3B GO:0016491 (oxidoreductase activity)%2C GO:0055114 (oxidation-reduction process)
Exp	-0.646402	Down	1.28e-14	Aradu.W013I	cystathionine gamma-synthase%3B IPR000277 (Cys/Met metabolism%2C pyridoxal phosphate-dependent enzyme)%2C IPR015424 (Pyridoxal phosphate-dependent transferase)%3B GO:0003824 (catalytic activity)%2C GO:0030170 (pyridoxal phosphate binding)
Meth	-0.915816	Down	0.0443862	Aradu.W013I	cystathionine gamma-synthase%3B IPR000277 (Cys/Met metabolism%2C pyridoxal phosphate-dependent enzyme)%2C IPR015424 (Pyridoxal phosphate-dependent transferase)%3B GO:0003824 (catalytic activity)%2C GO:0030170 (pyridoxal phosphate binding)
Exp	0.764724	Up	3.29e-07	Aradu.YKL3P	transcription factor ICE1-like [Glycine max]%3B IPR011598 (Myc-type%2C basic helix-loop-helix (bHLH) domain)%3B GO:0046983 (protein dimerization activity)
Meth	0.447878	Up	0.025196	Aradu.YKL3P_DOWN	transcription factor ICE1-like [Glycine max]%3B IPR011598 (Myc-type%2C basic helix-loop-helix (bHLH) domain)%3B GO:0046983 (protein dimerization activity)
Exp	0.938964	Up	9.8e-25	Aradu.YY49G	Tryptophan RNA-binding attenuator protein-like%3B IPR002838 (Mitochondrial biogenesis protein AIM24)%2C IPR016031 (Tryptophan RNA-binding attenuator protein-like domain)
Meth	0.344177	Up	3.72e-18	Aradu.YY49G	Tryptophan RNA-binding attenuator protein-like%3B IPR002838 (Mitochondrial biogenesis protein AIM24)%2C IPR016031 (Tryptophan RNA-binding attenuator protein-like domain)
Exp	1.93157	Up	0.000312918	Aradu.Z7Z26	photosystem I assembly protein Ycf4%3B IPR003359 (Photosystem I Ycf4%2C assembly)%2C IPR003398 (Photosystem II PsbN)%3B GO:0009522 (photosystem I)%2C GO:0009523 (photosystem II)%2C GO:0009539 (photosystem II reaction center)%2C GO:0009579 (thylakoid)%2C GO:0015979 (photosynthesis)%2C GO:0016020 (membrane)%2C GO:0016021 (integral component of membrane)
Meth	0.492832	Up	0.000150595	Aradu.Z7Z26	photosystem I assembly protein Ycf4%3B IPR003359 (Photosystem I Ycf4%2C assembly)%2C IPR003398 (Photosystem II PsbN)%3B GO:0009522 (photosystem I)%2C GO:0009523 (photosystem II)%2C GO:0009539 (photosystem II reaction center)%2C GO:0009579 (thylakoid)%2C GO:0015979 (photosynthesis)%2C GO:0016020 (membrane)%2C GO:0016021 (integral component of membrane)
Exp	-0.816592	Down	2.77e-07	Aradu.Z9DZQ	2-oxoglutarate (2OG) and Fe(II)-dependent oxygenase superfamily protein%3B IPR005123 (Oxoglutarate/iron-dependent dioxygenase)%2C IPR026992 (Non-haem dioxygenase N-terminal domain)%2C IPR027443 (Isopenicillin N synthase-like)%3B GO:0016491 (oxidoreductase activity)%2C GO:0055114 (oxidation-reduction process)
Meth	-0.51383	Down	0.000656955	Aradu.Z9DZQ	2-oxoglutarate (2OG) and Fe(II)-dependent oxygenase superfamily protein%3B IPR005123 (Oxoglutarate/iron-dependent dioxygenase)%2C IPR026992 (Non-haem dioxygenase N-terminal domain)%2C IPR027443 (Isopenicillin N synthase-like)%3B GO:0016491 (oxidoreductase activity)%2C GO:0055114 (oxidation-reduction process)
Exp	2.47177	Up	5.95e-05	Aradu.ZQ4AK	photosystem II protein D1 [Glycine max]%3B IPR000484 (Photosynthetic reaction centre%2C L/M)%3B GO:0009055 (electron carrier activity)%2C GO:0009772 (photosynthetic electron transport in photosystem II)
Meth	0.325175	Up	0.000952345	Aradu.ZQ4AK_UP	photosystem II protein D1 [Glycine max]%3B IPR000484 (Photosynthetic reaction centre%2C L/M)%3B GO:0009055 (electron carrier activity)%2C GO:0009772 (photosynthetic electron transport in photosystem II)
Exp	1.21243	Up	5.38e-30	Araip.0BL53	Glutathione S-transferase family protein%3B IPR010987 (Glutathione S-transferase%2C C-terminal-like)%2C IPR012336 (Thioredoxin-like fold)%3B GO:0005515 (protein binding)
Meth	-0.899502	Down	0.000215168	Araip.0BL53_DOWN	Glutathione S-transferase family protein%3B IPR010987 (Glutathione S-transferase%2C C-terminal-like)%2C IPR012336 (Thioredoxin-like fold)%3B GO:0005515 (protein binding)
Exp	-2.23142	Down	2.32e-08	Araip.H1IIW	disease-resistance response protein%3B IPR000916 (Bet v I domain)%2C IPR023393 (START-like domain)%2C IPR024949 (Bet v I type allergen)%3B GO:0006952 (defense response)%2C GO:0009607 (response to biotic stimulus)
Meth	-0.688182	Down	0.000898235	Araip.H1IIW_DOWN	disease-resistance response protein%3B IPR000916 (Bet v I domain)%2C IPR023393 (START-like domain)%2C IPR024949 (Bet v I type allergen)%3B GO:0006952 (defense response)%2C GO:0009607 (response to biotic stimulus)
Exp	0.877926	Up	1e-15	Araip.K42T4	1%2C2-dihydroxy-3-keto-5-methylthiopentene dioxygenase%3B IPR004313 (Acireductone dioxygenase ARD family)%3B GO:0010309 (acireductone dioxygenase [iron(II)-requiring] activity)%2C GO:0055114 (oxidation-reduction process)
Meth	-2.03028	Down	0.0118183	Araip.K42T4_UP	1%2C2-dihydroxy-3-keto-5-methylthiopentene dioxygenase%3B IPR004313 (Acireductone dioxygenase ARD family)%3B GO:0010309 (acireductone dioxygenase [iron(II)-requiring] activity)%2C GO:0055114 (oxidation-reduction process)
Exp	-0.358388	Down	0.00133994	Araip.NUL7W	3-ketodihydrosphingosine reductase-like protein%3B IPR002198 (Short-chain dehydrogenase/reductase SDR)%3B GO:0008152 (metabolic process)%2C GO:0016491 (oxidoreductase activity)
Meth	-1.77798	Down	0.00231583	Araip.NUL7W	3-ketodihydrosphingosine reductase-like protein%3B IPR002198 (Short-chain dehydrogenase/reductase SDR)%3B GO:0008152 (metabolic process)%2C GO:0016491 (oxidoreductase activity)
Exp	0.951661	Up	2.21e-18	Araip.Q6F18	nodulin MtN21 /EamA-like transporter family protein%3B IPR000620 (Drug/metabolite transporter)%3B GO:0016020 (membrane)
Meth	-1.02791	Down	0.0470326	Araip.Q6F18_DOWN	nodulin MtN21 /EamA-like transporter family protein%3B IPR000620 (Drug/metabolite transporter)%3B GO:0016020 (membrane)

## Sheet: S1-S3
Type	logFC	The change of S1 relative to S3	PValue	ID	ANNO
Exp	2.18566	Up	1.18e-96	Aradu.02TFB	Peroxidase superfamily protein%3B IPR010255 (Haem peroxidase)%3B GO:0004601 (peroxidase activity)%2C GO:0006979 (response to oxidative stress)%2C GO:0020037 (heme binding)%2C GO:0055114 (oxidation-reduction process)
Meth	0.821666	Up	0.0244629	Aradu.02TFB	Peroxidase superfamily protein%3B IPR010255 (Haem peroxidase)%3B GO:0004601 (peroxidase activity)%2C GO:0006979 (response to oxidative stress)%2C GO:0020037 (heme binding)%2C GO:0055114 (oxidation-reduction process)
Exp	3.96767	Up	1.09e-31	Aradu.10YCG	Protein of unknown function (DUF179)%3B IPR003774 (Protein of unknown function UPF0301)
Meth	-0.53572	Down	2.48e-05	Aradu.10YCG_UP	Protein of unknown function (DUF179)%3B IPR003774 (Protein of unknown function UPF0301)
Exp	-1.2913	Down	2.32e-14	Aradu.1GS41	Protein kinase superfamily protein%3B IPR011009 (Protein kinase-like domain)%3B GO:0004672 (protein kinase activity)%2C GO:0004674 (protein serine/threonine kinase activity)%2C GO:0005524 (ATP binding)%2C GO:0006468 (protein phosphorylation)
Meth	-0.516881	Down	0.000412836	Aradu.1GS41_UP	Protein kinase superfamily protein%3B IPR011009 (Protein kinase-like domain)%3B GO:0004672 (protein kinase activity)%2C GO:0004674 (protein serine/threonine kinase activity)%2C GO:0005524 (ATP binding)%2C GO:0006468 (protein phosphorylation)
Exp	4.18711	Up	6.4e-106	Aradu.1NE4R	uncharacterized protein LOC100811424 isoform X9 [Glycine max]
Meth	0.883227	Up	0.00557388	Aradu.1NE4R_UP	uncharacterized protein LOC100811424 isoform X9 [Glycine max]
Exp	-1.16406	Down	7.67e-28	Aradu.23UDC	ATP binding microtubule motor family protein%3B IPR001752 (Kinesin%2C motor domain)%2C IPR027417 (P-loop containing nucleoside triphosphate hydrolase)%2C IPR027640 (Kinesin-like protein)%3B GO:0003777 (microtubule motor activity)%2C GO:0005524 (ATP binding)%2C GO:0005871 (kinesin complex)%2C GO:0007018 (microtubule-based movement)%2C GO:0008017 (microtubule binding)
Meth	-0.414444	Down	2.27e-07	Aradu.23UDC_UP	ATP binding microtubule motor family protein%3B IPR001752 (Kinesin%2C motor domain)%2C IPR027417 (P-loop containing nucleoside triphosphate hydrolase)%2C IPR027640 (Kinesin-like protein)%3B GO:0003777 (microtubule motor activity)%2C GO:0005524 (ATP binding)%2C GO:0005871 (kinesin complex)%2C GO:0007018 (microtubule-based movement)%2C GO:0008017 (microtubule binding)
Exp	1.19334	Up	0.000157321	Aradu.251QA	external alternative NAD(P)H-ubiquinone oxidoreductase B2%2C mitochondrial-like isoform X2 [Glycine max]%3B IPR011992 (EF-hand domain pair)%2C IPR013027 (FAD-dependent pyridine nucleotide-disulphide oxidoreductase)%2C IPR023753 (Pyridine nucleotide-disulphide oxidoreductase%2C FAD/NAD(P)-binding domain)%3B GO:0005509 (calcium ion binding)%2C GO:0016491 (oxidoreductase activity)%2C GO:0050660 (fla…
Meth	0.997005	Up	0.0175344	Aradu.251QA	external alternative NAD(P)H-ubiquinone oxidoreductase B2%2C mitochondrial-like isoform X2 [Glycine max]%3B IPR011992 (EF-hand domain pair)%2C IPR013027 (FAD-dependent pyridine nucleotide-disulphide oxidoreductase)%2C IPR023753 (Pyridine nucleotide-disulphide oxidoreductase%2C FAD/NAD(P)-binding domain)%3B GO:0005509 (calcium ion binding)%2C GO:0016491 (oxidoreductase activity)%2C GO:0050660 (fla…
Exp	4.14464	Up	9.11e-238	Aradu.28NB9	Calcium-binding EF-hand family protein%3B IPR004837 (Sodium/calcium exchanger membrane region)%2C IPR011992 (EF-hand domain pair)%3B GO:0005509 (calcium ion binding)%2C GO:0016021 (integral component of membrane)%2C GO:0055085 (transmembrane transport)
Meth	0.761512	Up	2.65e-08	Aradu.28NB9_UP	Calcium-binding EF-hand family protein%3B IPR004837 (Sodium/calcium exchanger membrane region)%2C IPR011992 (EF-hand domain pair)%3B GO:0005509 (calcium ion binding)%2C GO:0016021 (integral component of membrane)%2C GO:0055085 (transmembrane transport)
Exp	0.917781	Up	5.64e-05	Aradu.2GW9A	vacuolar protein sorting 41%3B IPR011990 (Tetratricopeptide-like helical)%2C IPR013083 (Zinc finger%2C RING/FYVE/PHD-type)%2C IPR015943 (WD40/YVTN repeat-like-containing domain)%2C IPR016902 (Vacuolar protein sorting-associated protein 41)%3B GO:0005515 (protein binding)%2C GO:0006886 (intracellular protein transport)%2C GO:0008270 (zinc ion binding)%2C GO:0016192 (vesicle-mediated transport)
Meth	0.396752	Up	0.00280765	Aradu.2GW9A_UP	vacuolar protein sorting 41%3B IPR011990 (Tetratricopeptide-like helical)%2C IPR013083 (Zinc finger%2C RING/FYVE/PHD-type)%2C IPR015943 (WD40/YVTN repeat-like-containing domain)%2C IPR016902 (Vacuolar protein sorting-associated protein 41)%3B GO:0005515 (protein binding)%2C GO:0006886 (intracellular protein transport)%2C GO:0008270 (zinc ion binding)%2C GO:0016192 (vesicle-mediated transport)
Exp	-5.35076	Down	2.64e-137	Aradu.31H7A	glycerol-3-phosphate acyltransferase 6%3B IPR002123 (Phospholipid/glycerol acyltransferase)%2C IPR023214 (HAD-like domain)%3B GO:0008152 (metabolic process)
Meth	-0.311209	Down	0.00528583	Aradu.31H7A_DOWN	glycerol-3-phosphate acyltransferase 6%3B IPR002123 (Phospholipid/glycerol acyltransferase)%2C IPR023214 (HAD-like domain)%3B GO:0008152 (metabolic process)
Exp	-0.771376	Down	4.35e-14	Aradu.3AT2D	selenium-binding protein 1%3B IPR008826 (Selenium-binding protein)%3B GO:0005515 (protein binding)%2C GO:0008430 (selenium binding)
Meth	-1.45775	Down	0.000306994	Aradu.3AT2D	selenium-binding protein 1%3B IPR008826 (Selenium-binding protein)%3B GO:0005515 (protein binding)%2C GO:0008430 (selenium binding)
Exp	3.27406	Up	0.500007	Aradu.3N53I	long-chain-alcohol oxidase FAO4A-like [Glycine max]
Meth	0.854022	Up	0.0186194	Aradu.3N53I_DOWN	long-chain-alcohol oxidase FAO4A-like [Glycine max]
Exp	0.862585	Up	5.49e-11	Aradu.413LK	photosystem II CP43 chlorophyll apoprotein%3B IPR000484 (Photosynthetic reaction centre%2C L/M)%2C IPR000932 (Photosystem antenna protein-like)%2C IPR001135 (NADH-quinone oxidoreductase%2C subunit D)%3B GO:0009521 (photosystem)%2C GO:0009523 (photosystem II)%2C GO:0009767 (photosynthetic electron transport chain)%2C GO:0009772 (photosynthetic electron transport in photosystem II)%2C GO:0015979 (p…
Meth	0.748137	Up	0.0129222	Aradu.413LK_UP	photosystem II CP43 chlorophyll apoprotein%3B IPR000484 (Photosynthetic reaction centre%2C L/M)%2C IPR000932 (Photosystem antenna protein-like)%2C IPR001135 (NADH-quinone oxidoreductase%2C subunit D)%3B GO:0009521 (photosystem)%2C GO:0009523 (photosystem II)%2C GO:0009767 (photosynthetic electron transport chain)%2C GO:0009772 (photosynthetic electron transport in photosystem II)%2C GO:0015979 (p…
Exp	0.545531	Up	6.14e-08	Aradu.4C32F	glycogen phosphorylase 1-like isoform X1 [Glycine max]%3B IPR000811 (Glycosyl transferase%2C family 35)%3B GO:0004645 (phosphorylase activity)%2C GO:0005975 (carbohydrate metabolic process)%2C GO:0008184 (glycogen phosphorylase activity)%2C GO:0030170 (pyridoxal phosphate binding)
Meth	0.981012	Up	0.000534249	Aradu.4C32F	glycogen phosphorylase 1-like isoform X1 [Glycine max]%3B IPR000811 (Glycosyl transferase%2C family 35)%3B GO:0004645 (phosphorylase activity)%2C GO:0005975 (carbohydrate metabolic process)%2C GO:0008184 (glycogen phosphorylase activity)%2C GO:0030170 (pyridoxal phosphate binding)
Exp	-0.676898	Down	0.00108225	Aradu.4CC43	receptor kinase 2%3B IPR002902 (Gnk2-homologous domain)%2C IPR011009 (Protein kinase-like domain)%2C IPR013320 (Concanavalin A-like lectin/glucanase%2C subgroup)%3B GO:0004672 (protein kinase activity)%2C GO:0005524 (ATP binding)%2C GO:0006468 (protein phosphorylation)
Meth	1.30646	Up	0.0243074	Aradu.4CC43	receptor kinase 2%3B IPR002902 (Gnk2-homologous domain)%2C IPR011009 (Protein kinase-like domain)%2C IPR013320 (Concanavalin A-like lectin/glucanase%2C subgroup)%3B GO:0004672 (protein kinase activity)%2C GO:0005524 (ATP binding)%2C GO:0006468 (protein phosphorylation)
Exp	-0.338598	Down	0.00108675	Aradu.4FA0W	Protein kinase superfamily protein%3B IPR011009 (Protein kinase-like domain)%3B GO:0004672 (protein kinase activity)%2C GO:0005524 (ATP binding)%2C GO:0006468 (protein phosphorylation)
Meth	-0.568642	Down	0.0447667	Aradu.4FA0W_DOWN	Protein kinase superfamily protein%3B IPR011009 (Protein kinase-like domain)%3B GO:0004672 (protein kinase activity)%2C GO:0005524 (ATP binding)%2C GO:0006468 (protein phosphorylation)
Exp	2.20119	Up	1.01e-07	Aradu.4R8IN	glucan endo-1%2C3-beta-glucosidase-like [Glycine max]%3B IPR000490 (Glycoside hydrolase%2C family 17)%2C IPR017853 (Glycoside hydrolase%2C superfamily)%3B GO:0005975 (carbohydrate metabolic process)
Meth	-0.447072	Down	0.00187405	Aradu.4R8IN	glucan endo-1%2C3-beta-glucosidase-like [Glycine max]%3B IPR000490 (Glycoside hydrolase%2C family 17)%2C IPR017853 (Glycoside hydrolase%2C superfamily)%3B GO:0005975 (carbohydrate metabolic process)
Exp	3.9648	Up	4.2e-73	Aradu.5K97F	unknown protein%3B Has 39 Blast hits to 39 proteins in 15 species: Archae - 0%3B Bacteria - 0%3B Metazoa - 0%3B Fungi - 0%3B Plants - 39%3B Viruses - 0%3B Other Eukaryotes - 0 (source: NCBI BLink).
Meth	1.86317	Up	0.00119334	Aradu.5K97F	unknown protein%3B Has 39 Blast hits to 39 proteins in 15 species: Archae - 0%3B Bacteria - 0%3B Metazoa - 0%3B Fungi - 0%3B Plants - 39%3B Viruses - 0%3B Other Eukaryotes - 0 (source: NCBI BLink).
Exp	3.7536	Up	4.65e-07	Aradu.5NN3C	Flavin-binding monooxygenase family protein%3B IPR013027 (FAD-dependent pyridine nucleotide-disulphide oxidoreductase)%2C IPR020946 (Flavin monooxygenase-like)%3B GO:0016491 (oxidoreductase activity)%2C GO:0050660 (flavin adenine dinucleotide binding)%2C GO:0050661 (NADP binding)%2C GO:0055114 (oxidation-reduction process)
Meth	-0.341514	Down	0.0365901	Aradu.5NN3C_UP	Flavin-binding monooxygenase family protein%3B IPR013027 (FAD-dependent pyridine nucleotide-disulphide oxidoreductase)%2C IPR020946 (Flavin monooxygenase-like)%3B GO:0016491 (oxidoreductase activity)%2C GO:0050660 (flavin adenine dinucleotide binding)%2C GO:0050661 (NADP binding)%2C GO:0055114 (oxidation-reduction process)
Exp	-0.260432	Down	0.00867021	Aradu.6CW5S	protein IQ-DOMAIN 1-like isoform X1 [Glycine max]%3B IPR000048 (IQ motif%2C EF-hand binding site)%3B GO:0005515 (protein binding)
Meth	-0.58107	Down	6.97e-05	Aradu.6CW5S_UP	protein IQ-DOMAIN 1-like isoform X1 [Glycine max]%3B IPR000048 (IQ motif%2C EF-hand binding site)%3B GO:0005515 (protein binding)
Exp	-1.81053	Down	1.26e-11	Aradu.78VGB	UNC93-like protein 1-like [Glycine max]%3B IPR010291 (Ion channel regulatory protein%2C UNC-93)%2C IPR016196 (Major facilitator superfamily domain%2C general substrate transporter)
Meth	-0.414006	Down	4.22e-06	Aradu.78VGB_UP	UNC93-like protein 1-like [Glycine max]%3B IPR010291 (Ion channel regulatory protein%2C UNC-93)%2C IPR016196 (Major facilitator superfamily domain%2C general substrate transporter)
Exp	1.35816	Up	2.02e-25	Aradu.81L13	Ribosomal L28 family%3B IPR001383 (Ribosomal protein L28)%3B GO:0003735 (structural constituent of ribosome)%2C GO:0005622 (intracellular)%2C GO:0005840 (ribosome)%2C GO:0006412 (translation)
Meth	2.45034	Up	0.00738542	Aradu.81L13_DOWN	Ribosomal L28 family%3B IPR001383 (Ribosomal protein L28)%3B GO:0003735 (structural constituent of ribosome)%2C GO:0005622 (intracellular)%2C GO:0005840 (ribosome)%2C GO:0006412 (translation)
Exp	-0.774832	Down	2.86e-07	Aradu.8IQ1U	hypothetical protein
Meth	-0.317935	Down	3.92e-06	Aradu.8IQ1U_UP	hypothetical protein
Exp	-1.0667	Down	5.84e-21	Aradu.8IX7E	receptor-like protein kinase 2%3B IPR001611 (Leucine-rich repeat)%2C IPR011009 (Protein kinase-like domain)%2C IPR013210 (Leucine-rich repeat-containing N-terminal%2C type 2)%2C IPR013320 (Concanavalin A-like lectin/glucanase%2C subgroup)%3B GO:0004672 (protein kinase activity)%2C GO:0005515 (protein binding)%2C GO:0006468 (protein phosphorylation)
Meth	-1.38526	Down	0.0413902	Aradu.8IX7E_UP	receptor-like protein kinase 2%3B IPR001611 (Leucine-rich repeat)%2C IPR011009 (Protein kinase-like domain)%2C IPR013210 (Leucine-rich repeat-containing N-terminal%2C type 2)%2C IPR013320 (Concanavalin A-like lectin/glucanase%2C subgroup)%3B GO:0004672 (protein kinase activity)%2C GO:0005515 (protein binding)%2C GO:0006468 (protein phosphorylation)
Exp	2.45098	Up	5.66e-87	Aradu.99WG9	Cytochrome P450 superfamily protein%3B IPR001128 (Cytochrome P450)%3B GO:0005506 (iron ion binding)%2C GO:0020037 (heme binding)%2C GO:0055114 (oxidation-reduction process)
Meth	-0.376635	Down	0.0120036	Aradu.99WG9	Cytochrome P450 superfamily protein%3B IPR001128 (Cytochrome P450)%3B GO:0005506 (iron ion binding)%2C GO:0020037 (heme binding)%2C GO:0055114 (oxidation-reduction process)
Exp	-1.76004	Down	3.01e-09	Aradu.9A5PX	Rhamnogalacturonate lyase family protein%3B IPR008979 (Galactose-binding domain-like)%2C IPR010325 (Rhamnogalacturonate lyase)%2C IPR011013 (Galactose mutarotase-like domain)%2C IPR013784 (Carbohydrate-binding-like fold)%2C IPR014766 (Carboxypeptidase%2C regulatory domain)%3B GO:0003824 (catalytic activity)%2C GO:0005975 (carbohydrate metabolic process)%2C GO:0030246 (carbohydrate binding)
Meth	-0.49357	Down	0.00359433	Aradu.9A5PX_UP	Rhamnogalacturonate lyase family protein%3B IPR008979 (Galactose-binding domain-like)%2C IPR010325 (Rhamnogalacturonate lyase)%2C IPR011013 (Galactose mutarotase-like domain)%2C IPR013784 (Carbohydrate-binding-like fold)%2C IPR014766 (Carboxypeptidase%2C regulatory domain)%3B GO:0003824 (catalytic activity)%2C GO:0005975 (carbohydrate metabolic process)%2C GO:0030246 (carbohydrate binding)
Exp	-4.25794	Down	1.62e-11	Aradu.9NC59	Cytochrome P450 superfamily protein%3B IPR001128 (Cytochrome P450)%3B GO:0005506 (iron ion binding)%2C GO:0020037 (heme binding)%2C GO:0055114 (oxidation-reduction process)
Meth	-0.336732	Down	4.96e-05	Aradu.9NC59	Cytochrome P450 superfamily protein%3B IPR001128 (Cytochrome P450)%3B GO:0005506 (iron ion binding)%2C GO:0020037 (heme binding)%2C GO:0055114 (oxidation-reduction process)
Exp	-1.02048	Down	9.27e-22	Aradu.9V11P	blue copper protein-like [Glycine max]%3B IPR008972 (Cupredoxin)%3B GO:0005507 (copper ion binding)%2C GO:0009055 (electron carrier activity)
Meth	1.2984	Up	0.00219041	Aradu.9V11P_UP	blue copper protein-like [Glycine max]%3B IPR008972 (Cupredoxin)%3B GO:0005507 (copper ion binding)%2C GO:0009055 (electron carrier activity)
Exp	-1.2639	Down	1.27e-06	Aradu.A2C3Y	ROP guanine nucleotide exchange factor 5%3B IPR005512 (PRONE domain)%3B GO:0005089 (Rho guanyl-nucleotide exchange factor activity)
Meth	2.23249	Up	0.0224613	Aradu.A2C3Y	ROP guanine nucleotide exchange factor 5%3B IPR005512 (PRONE domain)%3B GO:0005089 (Rho guanyl-nucleotide exchange factor activity)
Exp	4.15268	Up	3.64e-207	Aradu.A3N3V	glyceraldehyde-3-phosphate dehydrogenase C2%3B IPR020831 (Glyceraldehyde/Erythrose phosphate dehydrogenase family)%3B GO:0006006 (glucose metabolic process)%2C GO:0050661 (NADP binding)%2C GO:0051287 (NAD binding)%2C GO:0055114 (oxidation-reduction process)
Meth	-0.275242	Down	2.66e-06	Aradu.A3N3V	glyceraldehyde-3-phosphate dehydrogenase C2%3B IPR020831 (Glyceraldehyde/Erythrose phosphate dehydrogenase family)%3B GO:0006006 (glucose metabolic process)%2C GO:0050661 (NADP binding)%2C GO:0051287 (NAD binding)%2C GO:0055114 (oxidation-reduction process)
Exp	-0.631143	Down	5.52e-12	Aradu.A68AJ	DNA replication factor CDT1-like protein%3B IPR014939 (CDT1 Geminin-binding domain-like)
Meth	-0.24957	Down	0.0298318	Aradu.A68AJ	DNA replication factor CDT1-like protein%3B IPR014939 (CDT1 Geminin-binding domain-like)
Exp	1.68159	Up	0.289091	Aradu.AJ4DZ	beta-galactosidase 3%3B IPR001944 (Glycoside hydrolase%2C family 35)%3B GO:0005975 (carbohydrate metabolic process)
Meth	-0.717488	Down	0.00633001	Aradu.AJ4DZ	beta-galactosidase 3%3B IPR001944 (Glycoside hydrolase%2C family 35)%3B GO:0005975 (carbohydrate metabolic process)
Exp	-0.469905	Down	2.41e-06	Aradu.AN030	aldo/keto reductase family oxidoreductase%3B IPR001395 (Aldo/keto reductase)%2C IPR023210 (NADP-dependent oxidoreductase domain)
Meth	-0.369301	Down	0.0234462	Aradu.AN030_UP	aldo/keto reductase family oxidoreductase%3B IPR001395 (Aldo/keto reductase)%2C IPR023210 (NADP-dependent oxidoreductase domain)
Exp	0.0366169	Up	0.677254	Aradu.AW9HW	histone-lysine N-methyltransferase SUVR2-like isoform X1 [Glycine max]%3B IPR001214 (SET domain)%2C IPR003105 (SRA-YDG)%2C IPR007728 (Pre-SET domain)%2C IPR015947 (PUA-like domain)%3B GO:0005515 (protein binding)%2C GO:0005634 (nucleus)%2C GO:0008270 (zinc ion binding)%2C GO:0018024 (histone-lysine N-methyltransferase activity)%2C GO:0034968 (histone lysine methylation)%2C GO:0042393 (histone bin…
Meth	0.760304	Up	0.0498031	Aradu.AW9HW_DOWN	histone-lysine N-methyltransferase SUVR2-like isoform X1 [Glycine max]%3B IPR001214 (SET domain)%2C IPR003105 (SRA-YDG)%2C IPR007728 (Pre-SET domain)%2C IPR015947 (PUA-like domain)%3B GO:0005515 (protein binding)%2C GO:0005634 (nucleus)%2C GO:0008270 (zinc ion binding)%2C GO:0018024 (histone-lysine N-methyltransferase activity)%2C GO:0034968 (histone lysine methylation)%2C GO:0042393 (histone bin…
Exp	5.56083	Up	1.23058815270118e-315	Aradu.B4GBB	photosystem I reaction center subunit IV A%3B IPR003375 (Photosystem I PsaE%2C reaction centre subunit IV)%3B GO:0009522 (photosystem I)%2C GO:0009538 (photosystem I reaction center)%2C GO:0015979 (photosynthesis)
Meth	-0.494568	Down	0.000188013	Aradu.B4GBB_DOWN	photosystem I reaction center subunit IV A%3B IPR003375 (Photosystem I PsaE%2C reaction centre subunit IV)%3B GO:0009522 (photosystem I)%2C GO:0009538 (photosystem I reaction center)%2C GO:0015979 (photosynthesis)
Exp	4.78947	Up	1.93e-244	Aradu.CI3JS	photosystem I reaction center subunit III%3B IPR003666 (Photosystem I PsaF%2C reaction centre subunit III)%3B GO:0009522 (photosystem I)%2C GO:0009538 (photosystem I reaction center)%2C GO:0015979 (photosynthesis)
Meth	1.06443	Up	0.00814769	Aradu.CI3JS_DOWN	photosystem I reaction center subunit III%3B IPR003666 (Photosystem I PsaF%2C reaction centre subunit III)%3B GO:0009522 (photosystem I)%2C GO:0009538 (photosystem I reaction center)%2C GO:0015979 (photosynthesis)
Meth	-0.071026	Down	0.469561	Aradu.CI3JS_UP	photosystem I reaction center subunit III%3B IPR003666 (Photosystem I PsaF%2C reaction centre subunit III)%3B GO:0009522 (photosystem I)%2C GO:0009538 (photosystem I reaction center)%2C GO:0015979 (photosynthesis)
Exp	0.661521	Up	3.79e-11	Aradu.CPK7I	Unknown protein
Meth	-0.780865	Down	1.96e-05	Aradu.CPK7I	Unknown protein
Exp	1.78813	Up	3.93e-11	Aradu.D7CPW	FAD dependent oxidoreductase n%3D1 Tax%3Dcyanobacterium PCC 7702 RepID%3DUPI00036A198D
Meth	1.90766	Up	0.00719761	Aradu.D7CPW_UP	FAD dependent oxidoreductase n%3D1 Tax%3Dcyanobacterium PCC 7702 RepID%3DUPI00036A198D
Exp	1.49383	Up	3.92e-56	Aradu.D85KR	alpha-L-fucosidase 1%3B IPR000933 (Glycoside hydrolase%2C family 29)%2C IPR008979 (Galactose-binding domain-like)%2C IPR017853 (Glycoside hydrolase%2C superfamily)%3B GO:0004560 (alpha-L-fucosidase activity)%2C GO:0005975 (carbohydrate metabolic process)%2C GO:0006004 (fucose metabolic process)
Meth	0.590631	Up	0.00954045	Aradu.D85KR_UP	alpha-L-fucosidase 1%3B IPR000933 (Glycoside hydrolase%2C family 29)%2C IPR008979 (Galactose-binding domain-like)%2C IPR017853 (Glycoside hydrolase%2C superfamily)%3B GO:0004560 (alpha-L-fucosidase activity)%2C GO:0005975 (carbohydrate metabolic process)%2C GO:0006004 (fucose metabolic process)
Exp	-0.314583	Down	0.000423792	Aradu.DC7TG	O-acetyltransferase family protein%3B IPR012419 (Cas1p 10 TM acyl transferase domain)
Meth	-0.396354	Down	0.0126291	Aradu.DC7TG	O-acetyltransferase family protein%3B IPR012419 (Cas1p 10 TM acyl transferase domain)
Exp	-4.87233	Down	7.96e-173	Aradu.DU6KM	uncharacterized protein LOC100803605 [Glycine max]%3B IPR006936 (Domain of unknown function DUF640)
Meth	1.80212	Up	0.0118183	Aradu.DU6KM_DOWN	uncharacterized protein LOC100803605 [Glycine max]%3B IPR006936 (Domain of unknown function DUF640)
Exp	-0.324429	Down	0.00226553	Aradu.DYU2E	transport inhibitor response 1-like protein-like [Glycine max]%3B IPR006553 (Leucine-rich repeat%2C cysteine-containing subtype)
Meth	1.05785	Up	0.0119291	Aradu.DYU2E	transport inhibitor response 1-like protein-like [Glycine max]%3B IPR006553 (Leucine-rich repeat%2C cysteine-containing subtype)
Exp	1.97169	Up	7.65e-41	Aradu.E14DK	PLATZ transcription factor family protein%3B IPR006734 (Protein of unknown function DUF597)
Meth	1.91592	Up	0.0212711	Aradu.E14DK_DOWN	PLATZ transcription factor family protein%3B IPR006734 (Protein of unknown function DUF597)
Exp	0.81345	Up	4.44e-07	Aradu.E177P	cytochrome c-2%3B IPR002327 (Cytochrome c%2C class IA/ IB)%2C IPR003088 (Cytochrome c domain)%2C IPR009056 (Cytochrome c-like domain)%3B GO:0005506 (iron ion binding)%2C GO:0009055 (electron carrier activity)%2C GO:0020037 (heme binding)
Meth	5.83491	Up	0.000122075	Aradu.E177P	cytochrome c-2%3B IPR002327 (Cytochrome c%2C class IA/ IB)%2C IPR003088 (Cytochrome c domain)%2C IPR009056 (Cytochrome c-like domain)%3B GO:0005506 (iron ion binding)%2C GO:0009055 (electron carrier activity)%2C GO:0020037 (heme binding)
Exp	3.70689	Up	0.000519284	Aradu.E3EVC	NAD(P)-binding Rossmann-fold superfamily protein%3B IPR002347 (Glucose/ribitol dehydrogenase)%3B GO:0008152 (metabolic process)%2C GO:0016491 (oxidoreductase activity)
Meth	0.91247	Up	0.000257345	Aradu.E3EVC_UP	NAD(P)-binding Rossmann-fold superfamily protein%3B IPR002347 (Glucose/ribitol dehydrogenase)%3B GO:0008152 (metabolic process)%2C GO:0016491 (oxidoreductase activity)
Exp	-1.3308	Down	7.95e-25	Aradu.EFI11	WD repeat-containing protein 5-like [Glycine max]%3B IPR015943 (WD40/YVTN repeat-like-containing domain)%3B GO:0005515 (protein binding)
Meth	0.316035	Up	0.012128	Aradu.EFI11_UP	WD repeat-containing protein 5-like [Glycine max]%3B IPR015943 (WD40/YVTN repeat-like-containing domain)%3B GO:0005515 (protein binding)
Exp	4.07512	Up	6.17e-38	Aradu.EG568	TPR repeat protein%3B IPR021883 (Protein of unknown function DUF3493)
Meth	-0.899979	Down	3.11e-05	Aradu.EG568	TPR repeat protein%3B IPR021883 (Protein of unknown function DUF3493)
Exp	-4.03677	Down	0.125008	Aradu.ESL6S	GDSL-like Lipase/Acylhydrolase family protein%3B IPR001087 (Lipase%2C GDSL)%3B GO:0006629 (lipid metabolic process)%2C GO:0016787 (hydrolase activity)
Meth	-0.343448	Down	0.0140449	Aradu.ESL6S_UP	GDSL-like Lipase/Acylhydrolase family protein%3B IPR001087 (Lipase%2C GDSL)%3B GO:0006629 (lipid metabolic process)%2C GO:0016787 (hydrolase activity)
Exp	-0.331101	Down	0.0235658	Aradu.FC7NZ	folate/biopterin transporter%3B IPR004324 (Biopterin transport-related protein BT1)
Meth	1.40168	Up	0.0432863	Aradu.FC7NZ	folate/biopterin transporter%3B IPR004324 (Biopterin transport-related protein BT1)
Exp	-7.41372	Down	2.39e-63	Aradu.GBM3Q	cinnamyl alcohol dehydrogenase 9%3B IPR002085 (Alcohol dehydrogenase superfamily%2C zinc-type)%2C IPR016040 (NAD(P)-binding domain)%2C IPR020843 (Polyketide synthase%2C enoylreductase)%3B GO:0008270 (zinc ion binding)%2C GO:0016491 (oxidoreductase activity)%2C GO:0055114 (oxidation-reduction process)
Meth	-1.18413	Down	0.0288178	Aradu.GBM3Q_DOWN	cinnamyl alcohol dehydrogenase 9%3B IPR002085 (Alcohol dehydrogenase superfamily%2C zinc-type)%2C IPR016040 (NAD(P)-binding domain)%2C IPR020843 (Polyketide synthase%2C enoylreductase)%3B GO:0008270 (zinc ion binding)%2C GO:0016491 (oxidoreductase activity)%2C GO:0055114 (oxidation-reduction process)
Exp	1.3658	Up	3.44e-40	Aradu.GIP2Q	AP2-like ethylene-responsive transcription factor ANT-like isoform X2 [Glycine max]%3B IPR016177 (DNA-binding domain)%3B GO:0003677 (DNA binding)%2C GO:0003700 (sequence-specific DNA binding transcription factor activity)
Meth	-0.386763	Down	0.0017936	Aradu.GIP2Q_DOWN	AP2-like ethylene-responsive transcription factor ANT-like isoform X2 [Glycine max]%3B IPR016177 (DNA-binding domain)%3B GO:0003677 (DNA binding)%2C GO:0003700 (sequence-specific DNA binding transcription factor activity)
Exp	-0.200324	Down	0.043543	Aradu.HGY08	lysosomal alpha-mannosidase-like [Glycine max]%3B IPR011013 (Galactose mutarotase-like domain)%2C IPR011330 (Glycoside hydrolase/deacetylase%2C beta/alpha-barrel)%2C IPR013780 (Glycosyl hydrolase%2C family 13%2C all-beta)%2C IPR015341 (Glycoside hydrolase%2C family 38%2C central domain)%3B GO:0003824 (catalytic activity)%2C GO:0004559 (alpha-mannosidase activity)%2C GO:0005975 (carbohydrate metab…
Meth	0.415794	Up	0.0017757	Aradu.HGY08	lysosomal alpha-mannosidase-like [Glycine max]%3B IPR011013 (Galactose mutarotase-like domain)%2C IPR011330 (Glycoside hydrolase/deacetylase%2C beta/alpha-barrel)%2C IPR013780 (Glycosyl hydrolase%2C family 13%2C all-beta)%2C IPR015341 (Glycoside hydrolase%2C family 38%2C central domain)%3B GO:0003824 (catalytic activity)%2C GO:0004559 (alpha-mannosidase activity)%2C GO:0005975 (carbohydrate metab…
Exp	-0.207241	Down	0.0195008	Aradu.I2L2L	pre-mRNA-splicing factor SF2-like isoform X2 [Glycine max]%3B IPR012677 (Nucleotide-binding%2C alpha-beta plait)%3B GO:0000166 (nucleotide binding)%2C GO:0003676 (nucleic acid binding)
Meth	1.26396	Up	0.0200747	Aradu.I2L2L_DOWN	pre-mRNA-splicing factor SF2-like isoform X2 [Glycine max]%3B IPR012677 (Nucleotide-binding%2C alpha-beta plait)%3B GO:0000166 (nucleotide binding)%2C GO:0003676 (nucleic acid binding)
Exp	1.07011	Up	4.07e-14	Aradu.I3YXT	Glucose-methanol-choline (GMC) oxidoreductase family protein%3B IPR012132 (Glucose-methanol-choline oxidoreductase)%3B GO:0006066 (alcohol metabolic process)%2C GO:0008812 (choline dehydrogenase activity)%2C GO:0050660 (flavin adenine dinucleotide binding)%2C GO:0055114 (oxidation-reduction process)
Meth	1.75156	Up	0.0146338	Aradu.I3YXT_DOWN	Glucose-methanol-choline (GMC) oxidoreductase family protein%3B IPR012132 (Glucose-methanol-choline oxidoreductase)%3B GO:0006066 (alcohol metabolic process)%2C GO:0008812 (choline dehydrogenase activity)%2C GO:0050660 (flavin adenine dinucleotide binding)%2C GO:0055114 (oxidation-reduction process)
Exp	-0.181603	Down	0.242619	Aradu.J4D1T	survival motor neuron interacting protein%3B IPR007022 (Gem-associated protein 2)%3B GO:0000387 (spliceosomal snRNP assembly)%2C GO:0005681 (spliceosomal complex)
Meth	-0.423241	Down	7.81e-06	Aradu.J4D1T_UP	survival motor neuron interacting protein%3B IPR007022 (Gem-associated protein 2)%3B GO:0000387 (spliceosomal snRNP assembly)%2C GO:0005681 (spliceosomal complex)
Exp	0.574255	Up	3.11e-06	Aradu.JK25B	Lipid transfer protein%3B IPR000528 (Plant lipid transfer protein/Par allergen)%2C IPR016140 (Bifunctional inhibitor/plant lipid transfer protein/seed storage helical domain)%3B GO:0006869 (lipid transport)%2C GO:0008289 (lipid binding)
Meth	0.32034	Up	0.0135323	Aradu.JK25B_UP	Lipid transfer protein%3B IPR000528 (Plant lipid transfer protein/Par allergen)%2C IPR016140 (Bifunctional inhibitor/plant lipid transfer protein/seed storage helical domain)%3B GO:0006869 (lipid transport)%2C GO:0008289 (lipid binding)
Exp	-1.96319	Down	0.000879483	Aradu.JL5FQ	chalcone synthase [Glycine max]%3B IPR011141 (Polyketide synthase%2C type III)%2C IPR016039 (Thiolase-like)%3B GO:0003824 (catalytic activity)%2C GO:0008152 (metabolic process)%2C GO:0009058 (biosynthetic process)
Meth	-0.397409	Down	2.46e-06	Aradu.JL5FQ	chalcone synthase [Glycine max]%3B IPR011141 (Polyketide synthase%2C type III)%2C IPR016039 (Thiolase-like)%3B GO:0003824 (catalytic activity)%2C GO:0008152 (metabolic process)%2C GO:0009058 (biosynthetic process)
Exp	2.06816	Up	3.14e-16	Aradu.KJ6HK	light-harvesting chlorophyll B-binding protein 3%3B IPR022796 (Chlorophyll A-B binding protein)%2C IPR023329 (Chlorophyll a/b binding protein domain)%3B GO:0016020 (membrane)
Meth	-0.283903	Down	0.0002999	Aradu.KJ6HK_UP	light-harvesting chlorophyll B-binding protein 3%3B IPR022796 (Chlorophyll A-B binding protein)%2C IPR023329 (Chlorophyll a/b binding protein domain)%3B GO:0016020 (membrane)
Exp	-0.914552	Down	7.82e-06	Aradu.KS0F0	nucleobase-ascorbate transporter 7%3B IPR006043 (Xanthine/uracil/vitamin C permease)%3B GO:0005215 (transporter activity)%2C GO:0006810 (transport)%2C GO:0016020 (membrane)%2C GO:0055085 (transmembrane transport)
Meth	-2.24391	Down	0.0127261	Aradu.KS0F0_DOWN	nucleobase-ascorbate transporter 7%3B IPR006043 (Xanthine/uracil/vitamin C permease)%3B GO:0005215 (transporter activity)%2C GO:0006810 (transport)%2C GO:0016020 (membrane)%2C GO:0055085 (transmembrane transport)
Exp	0.717081	Up	1.55e-10	Aradu.KY0UG	unknown protein
Meth	-0.313546	Down	0.000133331	Aradu.KY0UG_UP	unknown protein
Exp	-0.577554	Down	0.11438	Aradu.KYI0F	TLD-domain containing nucleolar protein%3B IPR006571 (TLDc)
Meth	-0.805781	Down	0.00651888	Aradu.KYI0F_UP	TLD-domain containing nucleolar protein%3B IPR006571 (TLDc)
Exp	0.817164	Up	0.0356443	Aradu.L1KP9	protein DA1-related 2-like isoform X1 [Glycine max]%3B IPR001781 (Zinc finger%2C LIM-type)%2C IPR022087 (Protein DA1 like)%3B GO:0008270 (zinc ion binding)
Meth	1.90766	Up	0.00719761	Aradu.L1KP9_DOWN	protein DA1-related 2-like isoform X1 [Glycine max]%3B IPR001781 (Zinc finger%2C LIM-type)%2C IPR022087 (Protein DA1 like)%3B GO:0008270 (zinc ion binding)
Exp	2.58755	Up	1.36e-23	Aradu.L3677	GDSL-like Lipase/Acylhydrolase superfamily protein%3B IPR001087 (Lipase%2C GDSL)%3B GO:0006629 (lipid metabolic process)%2C GO:0016787 (hydrolase activity)
Meth	-0.567124	Down	1.46e-06	Aradu.L3677_UP	GDSL-like Lipase/Acylhydrolase superfamily protein%3B IPR001087 (Lipase%2C GDSL)%3B GO:0006629 (lipid metabolic process)%2C GO:0016787 (hydrolase activity)
Exp	1.75113	Up	8.53e-25	Aradu.LA8W4	Bowman birk trypsin inhibitor%3B IPR000877 (Proteinase inhibitor I12%2C Bowman-Birk)%3B GO:0004867 (serine-type endopeptidase inhibitor activity)%2C GO:0005576 (extracellular region)
Meth	0.932802	Up	0.0328408	Aradu.LA8W4_DOWN	Bowman birk trypsin inhibitor%3B IPR000877 (Proteinase inhibitor I12%2C Bowman-Birk)%3B GO:0004867 (serine-type endopeptidase inhibitor activity)%2C GO:0005576 (extracellular region)
Exp	-0.591559	Down	0.00113341	Aradu.LVX7Z	UDP-N-acetylglucosamine--N-acetylmuramyl-(pentapeptide) pyrophosphoryl-undecaprenol N-acetylglucosamine transferase n%3D2 Tax%3DBacillus RepID%3DU5LB02_9BACI%3B IPR006009 (N-acetylglucosaminyltransferase%2C MurG)%3B GO:0005975 (carbohydrate metabolic process)%2C GO:0019277 (UDP-N-acetylgalactosamine biosynthetic process)%2C GO:0030246 (carbohydrate binding)%2C GO:0030259 (lipid glycosylation)%2C …
Meth	-0.562815	Down	0.017791	Aradu.LVX7Z	UDP-N-acetylglucosamine--N-acetylmuramyl-(pentapeptide) pyrophosphoryl-undecaprenol N-acetylglucosamine transferase n%3D2 Tax%3DBacillus RepID%3DU5LB02_9BACI%3B IPR006009 (N-acetylglucosaminyltransferase%2C MurG)%3B GO:0005975 (carbohydrate metabolic process)%2C GO:0019277 (UDP-N-acetylgalactosamine biosynthetic process)%2C GO:0030246 (carbohydrate binding)%2C GO:0030259 (lipid glycosylation)%2C …
Exp	0.730378	Up	1.52e-11	Aradu.LY3RK	MATE efflux family protein%3B IPR002528 (Multi antimicrobial extrusion protein)%3B GO:0006855 (drug transmembrane transport)%2C GO:0015238 (drug transmembrane transporter activity)%2C GO:0015297 (antiporter activity)%2C GO:0016020 (membrane)%2C GO:0055085 (transmembrane transport)
Meth	-0.631965	Down	0.00853307	Aradu.LY3RK_DOWN	MATE efflux family protein%3B IPR002528 (Multi antimicrobial extrusion protein)%3B GO:0006855 (drug transmembrane transport)%2C GO:0015238 (drug transmembrane transporter activity)%2C GO:0015297 (antiporter activity)%2C GO:0016020 (membrane)%2C GO:0055085 (transmembrane transport)
Exp	0.726266	Up	1.13e-10	Aradu.MJW1C	Chaperone DnaJ-domain superfamily protein%3B IPR001305 (Heat shock protein DnaJ%2C cysteine-rich domain)%2C IPR001623 (DnaJ domain)%2C IPR002939 (Chaperone DnaJ%2C C-terminal)%3B GO:0006457 (protein folding)%2C GO:0031072 (heat shock protein binding)%2C GO:0051082 (unfolded protein binding)
Meth	0.697884	Up	0.00851305	Aradu.MJW1C	Chaperone DnaJ-domain superfamily protein%3B IPR001305 (Heat shock protein DnaJ%2C cysteine-rich domain)%2C IPR001623 (DnaJ domain)%2C IPR002939 (Chaperone DnaJ%2C C-terminal)%3B GO:0006457 (protein folding)%2C GO:0031072 (heat shock protein binding)%2C GO:0051082 (unfolded protein binding)
Exp	-0.0972601	Down	0.571639	Aradu.MY095	RING finger and CHY zinc finger protein%3B IPR018943 (Oligosaccaryltransferase)
Meth	1.01749	Up	0.00142479	Aradu.MY095	RING finger and CHY zinc finger protein%3B IPR018943 (Oligosaccaryltransferase)
Exp	1.2919	Up	1.04e-45	Aradu.N0ICS	receptor-like protein kinase 2%3B IPR001611 (Leucine-rich repeat)%2C IPR003591 (Leucine-rich repeat%2C typical subtype)%2C IPR011009 (Protein kinase-like domain)%2C IPR013210 (Leucine-rich repeat-containing N-terminal%2C type 2)%2C IPR013320 (Concanavalin A-like lectin/glucanase%2C subgroup)%3B GO:0004672 (protein kinase activity)%2C GO:0005515 (protein binding)%2C GO:0005524 (ATP binding)%2C GO:…
Meth	-0.36733	Down	0.0474227	Aradu.N0ICS	receptor-like protein kinase 2%3B IPR001611 (Leucine-rich repeat)%2C IPR003591 (Leucine-rich repeat%2C typical subtype)%2C IPR011009 (Protein kinase-like domain)%2C IPR013210 (Leucine-rich repeat-containing N-terminal%2C type 2)%2C IPR013320 (Concanavalin A-like lectin/glucanase%2C subgroup)%3B GO:0004672 (protein kinase activity)%2C GO:0005515 (protein binding)%2C GO:0005524 (ATP binding)%2C GO:…
Exp	-2.69235	Down	1.04e-18	Aradu.N28VI	methyl esterase 3
Meth	-0.285293	Down	2.37e-10	Aradu.N28VI	methyl esterase 3
Exp	-1.61659	Down	7.92e-14	Aradu.NGF0Q	putative indole-3-acetic acid-amido synthetase GH3.9%3B IPR004993 (GH3 auxin-responsive promoter)
Meth	-0.453183	Down	0.000142724	Aradu.NGF0Q_UP	putative indole-3-acetic acid-amido synthetase GH3.9%3B IPR004993 (GH3 auxin-responsive promoter)
Exp	-0.935771	Down	3.84e-06	Aradu.NKE3U	5-methyltetrahydropteroyltriglutamate--homocysteine methyltransferase n%3D2 Tax%3DAlcaligenes RepID%3DM5J2G5_9BURK%3B IPR006276 (Cobalamin-independent methionine synthase)%3B GO:0003871 (5-methyltetrahydropteroyltriglutamate-homocysteine S-methyltransferase activity)%2C GO:0008270 (zinc ion binding)%2C GO:0008652 (cellular amino acid biosynthetic process)%2C GO:0009086 (methionine biosynthetic pr…
Meth	1.06562	Up	0.0186249	Aradu.NKE3U_DOWN	5-methyltetrahydropteroyltriglutamate--homocysteine methyltransferase n%3D2 Tax%3DAlcaligenes RepID%3DM5J2G5_9BURK%3B IPR006276 (Cobalamin-independent methionine synthase)%3B GO:0003871 (5-methyltetrahydropteroyltriglutamate-homocysteine S-methyltransferase activity)%2C GO:0008270 (zinc ion binding)%2C GO:0008652 (cellular amino acid biosynthetic process)%2C GO:0009086 (methionine biosynthetic pr…
Exp	2.77129	Up	5.27e-96	Aradu.P0VF2	Cytochrome P450 superfamily protein%3B IPR001128 (Cytochrome P450)%3B GO:0005506 (iron ion binding)%2C GO:0020037 (heme binding)%2C GO:0055114 (oxidation-reduction process)
Meth	1.30508	Up	0.00380198	Aradu.P0VF2	Cytochrome P450 superfamily protein%3B IPR001128 (Cytochrome P450)%3B GO:0005506 (iron ion binding)%2C GO:0020037 (heme binding)%2C GO:0055114 (oxidation-reduction process)
Exp	-0.515165	Down	0.000113299	Aradu.PQ90F	Unknown protein
Meth	0.422655	Up	0.0234341	Aradu.PQ90F	Unknown protein
Exp	0.613166	Up	1.87e-10	Aradu.QQ4AL	Ankyrin repeat family protein%3B IPR020683 (Ankyrin repeat-containing domain)%2C IPR026961 (PGG domain)%3B GO:0005515 (protein binding)
Meth	0.894582	Up	0.0300179	Aradu.QQ4AL	Ankyrin repeat family protein%3B IPR020683 (Ankyrin repeat-containing domain)%2C IPR026961 (PGG domain)%3B GO:0005515 (protein binding)
Exp	-0.711856	Down	4.19e-08	Aradu.QQC4U	DDB1- and CUL4-associated factor 8-like isoform X1 [Glycine max]%3B IPR015943 (WD40/YVTN repeat-like-containing domain)%3B GO:0005515 (protein binding)
Meth	1.17073	Up	0.0113523	Aradu.QQC4U	DDB1- and CUL4-associated factor 8-like isoform X1 [Glycine max]%3B IPR015943 (WD40/YVTN repeat-like-containing domain)%3B GO:0005515 (protein binding)
Exp	5.27455	Up	1.48e-293	Aradu.R6QT2	Cytochrome P450 superfamily protein%3B IPR001128 (Cytochrome P450)%3B GO:0005506 (iron ion binding)%2C GO:0020037 (heme binding)%2C GO:0055114 (oxidation-reduction process)
Meth	-0.481422	Down	0.00288627	Aradu.R6QT2_DOWN	Cytochrome P450 superfamily protein%3B IPR001128 (Cytochrome P450)%3B GO:0005506 (iron ion binding)%2C GO:0020037 (heme binding)%2C GO:0055114 (oxidation-reduction process)
Exp	-1.37528	Down	1.59e-06	Aradu.RFD9D	Cytochrome P450 superfamily protein%3B IPR001128 (Cytochrome P450)%3B GO:0005506 (iron ion binding)%2C GO:0020037 (heme binding)%2C GO:0055114 (oxidation-reduction process)
Meth	-0.319932	Down	0.000320431	Aradu.RFD9D	Cytochrome P450 superfamily protein%3B IPR001128 (Cytochrome P450)%3B GO:0005506 (iron ion binding)%2C GO:0020037 (heme binding)%2C GO:0055114 (oxidation-reduction process)
Meth	2.12475	Up	0.00031258	Aradu.RFD9D_UP	Cytochrome P450 superfamily protein%3B IPR001128 (Cytochrome P450)%3B GO:0005506 (iron ion binding)%2C GO:0020037 (heme binding)%2C GO:0055114 (oxidation-reduction process)
Exp	-1.64776	Down	3.78e-09	Aradu.S8QXC	Tesmin/TSO1-like CXC domain-containing protein%3B IPR005172 (CRC domain)
Meth	1.54443	Up	0.0106743	Aradu.S8QXC_DOWN	Tesmin/TSO1-like CXC domain-containing protein%3B IPR005172 (CRC domain)
Exp	2.79445	Up	1.78e-07	Aradu.SCK30	Chaperonin-like RbcX protein%3B IPR003435 (Chaperonin-like RbcX)
Meth	0.910758	Up	0.0402257	Aradu.SCK30_UP	Chaperonin-like RbcX protein%3B IPR003435 (Chaperonin-like RbcX)
Exp	-0.52554	Down	0.0400665	Aradu.SGN2M	Unknown protein
Meth	-0.551567	Down	5.54e-07	Aradu.SGN2M_UP	Unknown protein
Exp	2.52912	Up	6.57e-42	Aradu.SQ2UE	Sec14p-like phosphatidylinositol transfer family protein%3B IPR001251 (CRAL-TRIO domain)%2C IPR011074 (CRAL/TRIO%2C N-terminal domain)
Meth	1.62054	Up	0.000175153	Aradu.SQ2UE	Sec14p-like phosphatidylinositol transfer family protein%3B IPR001251 (CRAL-TRIO domain)%2C IPR011074 (CRAL/TRIO%2C N-terminal domain)
Exp	2.5578	Up	0.000180346	Aradu.SQD67	MATE efflux family protein%3B IPR002528 (Multi antimicrobial extrusion protein)%3B GO:0006855 (drug transmembrane transport)%2C GO:0015238 (drug transmembrane transporter activity)%2C GO:0015297 (antiporter activity)%2C GO:0016020 (membrane)%2C GO:0055085 (transmembrane transport)
Meth	1.41232	Up	0.0113316	Aradu.SQD67	MATE efflux family protein%3B IPR002528 (Multi antimicrobial extrusion protein)%3B GO:0006855 (drug transmembrane transport)%2C GO:0015238 (drug transmembrane transporter activity)%2C GO:0015297 (antiporter activity)%2C GO:0016020 (membrane)%2C GO:0055085 (transmembrane transport)
Exp	1.13736	Up	8.7e-33	Aradu.SQK9K	Peroxidase superfamily protein%3B IPR010255 (Haem peroxidase)%3B GO:0004601 (peroxidase activity)%2C GO:0006979 (response to oxidative stress)%2C GO:0020037 (heme binding)%2C GO:0055114 (oxidation-reduction process)
Meth	3.68756	Up	0.000144965	Aradu.SQK9K_DOWN	Peroxidase superfamily protein%3B IPR010255 (Haem peroxidase)%3B GO:0004601 (peroxidase activity)%2C GO:0006979 (response to oxidative stress)%2C GO:0020037 (heme binding)%2C GO:0055114 (oxidation-reduction process)
Exp	2.78386	Up	3.63e-71	Aradu.SUG9B	short-chain dehydrogenase-reductase B%3B IPR002347 (Glucose/ribitol dehydrogenase)%3B GO:0008152 (metabolic process)%2C GO:0016491 (oxidoreductase activity)
Meth	-0.780221	Down	5.53e-05	Aradu.SUG9B	short-chain dehydrogenase-reductase B%3B IPR002347 (Glucose/ribitol dehydrogenase)%3B GO:0008152 (metabolic process)%2C GO:0016491 (oxidoreductase activity)
Exp	-0.925403	Down	7.9e-21	Aradu.T52CY	Auxin-responsive family protein%3B IPR004877 (Cytochrome b561%2C eukaryote)%2C IPR005018 (DOMON domain)%2C IPR017214 (Uncharacterised conserved protein UCP037471)%3B GO:0016021 (integral component of membrane)
Meth	-0.519397	Down	0.0131339	Aradu.T52CY_UP	Auxin-responsive family protein%3B IPR004877 (Cytochrome b561%2C eukaryote)%2C IPR005018 (DOMON domain)%2C IPR017214 (Uncharacterised conserved protein UCP037471)%3B GO:0016021 (integral component of membrane)
Exp	-1.1254	Down	0.000173811	Aradu.TE0XJ	MATE efflux family protein%3B IPR002528 (Multi antimicrobial extrusion protein)%3B GO:0006855 (drug transmembrane transport)%2C GO:0015238 (drug transmembrane transporter activity)%2C GO:0015297 (antiporter activity)%2C GO:0016020 (membrane)%2C GO:0055085 (transmembrane transport)
Meth	1.85541	Up	0.000430901	Aradu.TE0XJ_UP	MATE efflux family protein%3B IPR002528 (Multi antimicrobial extrusion protein)%3B GO:0006855 (drug transmembrane transport)%2C GO:0015238 (drug transmembrane transporter activity)%2C GO:0015297 (antiporter activity)%2C GO:0016020 (membrane)%2C GO:0055085 (transmembrane transport)
Exp	-1.55384	Down	1.27e-58	Aradu.TEL0Q	uncharacterized protein LOC100778886 [Glycine max]%3B IPR006936 (Domain of unknown function DUF640)
Meth	-0.462354	Down	0.000589074	Aradu.TEL0Q_UP	uncharacterized protein LOC100778886 [Glycine max]%3B IPR006936 (Domain of unknown function DUF640)
Exp	-0.160421	Down	0.0746153	Aradu.TJC58	selT-like protein-like [Glycine max]%3B IPR011893 (Selenoprotein%2C Rdx type)%2C IPR012336 (Thioredoxin-like fold)%3B GO:0008430 (selenium binding)%2C GO:0045454 (cell redox homeostasis)
Meth	0.768117	Up	0.0165106	Aradu.TJC58	selT-like protein-like [Glycine max]%3B IPR011893 (Selenoprotein%2C Rdx type)%2C IPR012336 (Thioredoxin-like fold)%3B GO:0008430 (selenium binding)%2C GO:0045454 (cell redox homeostasis)
Exp	-0.664792	Down	1.5e-14	Aradu.U2USZ	uncharacterized protein LOC100816165 isoform X4 [Glycine max]%3B IPR007650 (Protein of unknown function DUF581)
Meth	-0.605495	Down	0.00743586	Aradu.U2USZ_DOWN	uncharacterized protein LOC100816165 isoform X4 [Glycine max]%3B IPR007650 (Protein of unknown function DUF581)
Exp	-0.546324	Down	4.7e-07	Aradu.U61F3	RING/FYVE/PHD zinc finger superfamily protein%3B IPR011016 (Zinc finger%2C RING-CH-type)%2C IPR013083 (Zinc finger%2C RING/FYVE/PHD-type)%2C IPR022143 (Protein of unknown function DUF3675)%3B GO:0008270 (zinc ion binding)
Meth	1.48372	Up	0.0161254	Aradu.U61F3	RING/FYVE/PHD zinc finger superfamily protein%3B IPR011016 (Zinc finger%2C RING-CH-type)%2C IPR013083 (Zinc finger%2C RING/FYVE/PHD-type)%2C IPR022143 (Protein of unknown function DUF3675)%3B GO:0008270 (zinc ion binding)
Exp	6.35917	Up	1.12e-161	Aradu.VS58Y	basic helix-loop-helix (bHLH) DNA-binding superfamily protein%3B IPR015660 (Achaete-scute transcription factor-related)%3B GO:0003677 (DNA binding)%2C GO:0046983 (protein dimerization activity)
Meth	-0.620107	Down	0.00603955	Aradu.VS58Y_UP	basic helix-loop-helix (bHLH) DNA-binding superfamily protein%3B IPR015660 (Achaete-scute transcription factor-related)%3B GO:0003677 (DNA binding)%2C GO:0046983 (protein dimerization activity)
Exp	0.708961	Up	5.95e-11	Aradu.X37JH	unknown protein%3B Has 34 Blast hits to 34 proteins in 12 species: Archae - 0%3B Bacteria - 0%3B Metazoa - 0%3B Fungi - 0%3B Plants - 34%3B Viruses - 0%3B Other Eukaryotes - 0 (source: NCBI BLink).
Meth	1.88333	Up	0.00719761	Aradu.X37JH_DOWN	unknown protein%3B Has 34 Blast hits to 34 proteins in 12 species: Archae - 0%3B Bacteria - 0%3B Metazoa - 0%3B Fungi - 0%3B Plants - 34%3B Viruses - 0%3B Other Eukaryotes - 0 (source: NCBI BLink).
Exp	-0.176408	Down	0.0535747	Aradu.X5630	zinc finger CCCH domain-containing protein 38-like isoform X4 [Glycine max]%3B IPR000571 (Zinc finger%2C CCCH-type)%3B GO:0046872 (metal ion binding)
Meth	0.162653	Up	0.545545	Aradu.X5630	zinc finger CCCH domain-containing protein 38-like isoform X4 [Glycine max]%3B IPR000571 (Zinc finger%2C CCCH-type)%3B GO:0046872 (metal ion binding)
Meth	-0.364996	Down	0.000570897	Aradu.X5630_DOWN	zinc finger CCCH domain-containing protein 38-like isoform X4 [Glycine max]%3B IPR000571 (Zinc finger%2C CCCH-type)%3B GO:0046872 (metal ion binding)
Exp	0.490225	Up	8.52e-08	Aradu.X6DVK	YGGT family protein%3B IPR003425 (Uncharacterised protein family Ycf19)%3B GO:0016020 (membrane)
Meth	-0.408945	Down	0.00332019	Aradu.X6DVK_UP	YGGT family protein%3B IPR003425 (Uncharacterised protein family Ycf19)%3B GO:0016020 (membrane)
Exp	-0.927909	Down	4.59e-12	Aradu.X77WJ	cyclin b3%3B 1%3B IPR013763 (Cyclin-like)
Meth	0.506663	Up	0.0443789	Aradu.X77WJ	cyclin b3%3B 1%3B IPR013763 (Cyclin-like)
Exp	-3.07224	Down	0.00635061	Aradu.XB9DF	chalcone synthase [Glycine max]%3B IPR011141 (Polyketide synthase%2C type III)%2C IPR016039 (Thiolase-like)%3B GO:0003824 (catalytic activity)%2C GO:0008152 (metabolic process)%2C GO:0009058 (biosynthetic process)
Meth	1.06584	Up	4.12e-07	Aradu.XB9DF_DOWN	chalcone synthase [Glycine max]%3B IPR011141 (Polyketide synthase%2C type III)%2C IPR016039 (Thiolase-like)%3B GO:0003824 (catalytic activity)%2C GO:0008152 (metabolic process)%2C GO:0009058 (biosynthetic process)
Exp	-1.19015	Down	0.00155868	Aradu.XDR4X	Unknown protein
Meth	1.0859	Up	0.00490395	Aradu.XDR4X	Unknown protein
Exp	-0.1808	Down	0.0698466	Aradu.XW1R1	Ubiquitin ligase SCF complex subunit cullin n%3D1 Tax%3DChlamydomonas reinhardtii RepID%3DA8I7H0_CHLRE%3B IPR001373 (Cullin%2C N-terminal)%2C IPR011991 (Winged helix-turn-helix DNA-binding domain)%3B GO:0006511 (ubiquitin-dependent protein catabolic process)%2C GO:0031461 (cullin-RING ubiquitin ligase complex)%2C GO:0031625 (ubiquitin protein ligase binding)
Meth	0.505022	Up	0.0481887	Aradu.XW1R1	Ubiquitin ligase SCF complex subunit cullin n%3D1 Tax%3DChlamydomonas reinhardtii RepID%3DA8I7H0_CHLRE%3B IPR001373 (Cullin%2C N-terminal)%2C IPR011991 (Winged helix-turn-helix DNA-binding domain)%3B GO:0006511 (ubiquitin-dependent protein catabolic process)%2C GO:0031461 (cullin-RING ubiquitin ligase complex)%2C GO:0031625 (ubiquitin protein ligase binding)
Meth	0.418948	Up	0.305683	Aradu.XW1R1_UP	Ubiquitin ligase SCF complex subunit cullin n%3D1 Tax%3DChlamydomonas reinhardtii RepID%3DA8I7H0_CHLRE%3B IPR001373 (Cullin%2C N-terminal)%2C IPR011991 (Winged helix-turn-helix DNA-binding domain)%3B GO:0006511 (ubiquitin-dependent protein catabolic process)%2C GO:0031461 (cullin-RING ubiquitin ligase complex)%2C GO:0031625 (ubiquitin protein ligase binding)
Exp	-3.07442	Down	0.500007	Araip.4C7BD	DUF223 domain protein%3B IPR012340 (Nucleic acid-binding%2C OB-fold)
Meth	-1.22	Down	3.14e-16	Araip.4C7BD_DOWN	DUF223 domain protein%3B IPR012340 (Nucleic acid-binding%2C OB-fold)
Exp	1.18219	Up	9.86e-22	Araip.4XW2M	Leucine-rich repeat receptor-like protein kinase family protein%3B IPR001611 (Leucine-rich repeat)%3B GO:0005515 (protein binding)
Meth	-6.04698	Down	3.05e-05	Araip.4XW2M	Leucine-rich repeat receptor-like protein kinase family protein%3B IPR001611 (Leucine-rich repeat)%3B GO:0005515 (protein binding)
Exp	-0.241016	Down	0.720162	Araip.67WLC	octanoyltransferase-like [Glycine max]
Meth	-0.923566	Down	4.9e-07	Araip.67WLC	octanoyltransferase-like [Glycine max]
Exp	3.27406	Up	0.500007	Araip.7N3UE	Unknown protein
Meth	-3.70189	Down	4.17e-07	Araip.7N3UE	Unknown protein
Exp	-3.07442	Down	0.500007	Araip.F6CE0	cysteine-rich receptor-like protein kinase 10-like [Glycine max]%3B IPR002902 (Gnk2-homologous domain)
Meth	-1.50776	Down	0.0266043	Araip.F6CE0	cysteine-rich receptor-like protein kinase 10-like [Glycine max]%3B IPR002902 (Gnk2-homologous domain)
Exp	-0.530428	Down	0.0294273	Araip.IHN8D	Protein phosphatase 2C family protein%3B IPR001932 (Protein phosphatase 2C (PP2C)-like domain)%2C IPR015655 (Protein phosphatase 2C)%3B GO:0003824 (catalytic activity)
Meth	-2.23478	Down	4.13e-05	Araip.IHN8D	Protein phosphatase 2C family protein%3B IPR001932 (Protein phosphatase 2C (PP2C)-like domain)%2C IPR015655 (Protein phosphatase 2C)%3B GO:0003824 (catalytic activity)
Exp	2.68976	Up	7.84e-12	Araip.IIT1C	ferredoxin-NADP(+)-oxidoreductase 1
Meth	-2.92619	Down	0.000156532	Araip.IIT1C	ferredoxin-NADP(+)-oxidoreductase 1
Exp	-0.198831	Down	0.594526	Araip.IY4JL	kinesin-like protein 1
Meth	-4.75742	Down	0.0312502	Araip.IY4JL	kinesin-like protein 1
Exp	-3.98613	Down	0.125011	Araip.KNQ59	receptor-like protein kinase 4%3B IPR011009 (Protein kinase-like domain)%2C IPR013320 (Concanavalin A-like lectin/glucanase%2C subgroup)%3B GO:0004672 (protein kinase activity)%2C GO:0006468 (protein phosphorylation)
Meth	-3.45285	Down	5.72e-06	Araip.KNQ59	receptor-like protein kinase 4%3B IPR011009 (Protein kinase-like domain)%2C IPR013320 (Concanavalin A-like lectin/glucanase%2C subgroup)%3B GO:0004672 (protein kinase activity)%2C GO:0006468 (protein phosphorylation)
Exp	0.503361	Up	0.262616	Araip.M2DKH	callose synthase 2-like isoform X2 [Glycine max]%3B IPR016040 (NAD(P)-binding domain)
Meth	-1.23713	Down	8.31e-16	Araip.M2DKH_DOWN	callose synthase 2-like isoform X2 [Glycine max]%3B IPR016040 (NAD(P)-binding domain)
Exp	0.453169	Up	5.93e-05	Araip.MMB4Q	Membrane transporter D1 n%3D3 Tax%3DAndropogoneae RepID%3DB6U4Q3_MAIZE%3B IPR005828 (General substrate transporter)%2C IPR016196 (Major facilitator superfamily domain%2C general substrate transporter)%3B GO:0016020 (membrane)%2C GO:0016021 (integral component of membrane)%2C GO:0022857 (transmembrane transporter activity)%2C GO:0022891 (substrate-specific transmembrane transporter activity)%2C GO…
Meth	-1.44195	Down	0.0490425	Araip.MMB4Q_DOWN	Membrane transporter D1 n%3D3 Tax%3DAndropogoneae RepID%3DB6U4Q3_MAIZE%3B IPR005828 (General substrate transporter)%2C IPR016196 (Major facilitator superfamily domain%2C general substrate transporter)%3B GO:0016020 (membrane)%2C GO:0016021 (integral component of membrane)%2C GO:0022857 (transmembrane transporter activity)%2C GO:0022891 (substrate-specific transmembrane transporter activity)%2C GO…
Exp	-0.306839	Down	0.0299945	Araip.PF5AP	F-box/RNI-like superfamily protein%3B IPR001810 (F-box domain)%3B GO:0005515 (protein binding)
Meth	-1.07701	Down	1.51e-14	Araip.PF5AP_DOWN	F-box/RNI-like superfamily protein%3B IPR001810 (F-box domain)%3B GO:0005515 (protein binding)
Exp	-4.4428	Down	5.81e-08	Araip.PYI63	type I inositol 1%2C4%2C5-trisphosphate 5-phosphatase CVP2-like [Glycine max]%3B IPR005135 (Endonuclease/exonuclease/phosphatase)
Meth	-1.49013	Down	3.28e-12	Araip.PYI63_DOWN	type I inositol 1%2C4%2C5-trisphosphate 5-phosphatase CVP2-like [Glycine max]%3B IPR005135 (Endonuclease/exonuclease/phosphatase)
Exp	-1.32106	Down	0.115371	Araip.Q989H	cyclic nucleotide gated channel 19
Meth	-3.05607	Down	1.05e-05	Araip.Q989H_UP	cyclic nucleotide gated channel 19
Meth	-3.27537	Down	0.5	Araip.Q989H	cyclic nucleotide gated channel 19
Exp	0.669475	Up	0.135285	Araip.T4Z2A	beta-galactosidase 7%3B IPR001944 (Glycoside hydrolase%2C family 35)%2C IPR017853 (Glycoside hydrolase%2C superfamily)%3B GO:0005975 (carbohydrate metabolic process)
Meth	-1.07886	Down	0.000705494	Araip.T4Z2A	beta-galactosidase 7%3B IPR001944 (Glycoside hydrolase%2C family 35)%2C IPR017853 (Glycoside hydrolase%2C superfamily)%3B GO:0005975 (carbohydrate metabolic process)
Exp	-3.07442	Down	0.500007	Araip.V79U1	auxin response factor 9
Meth	-0.932662	Down	0.000300293	Araip.V79U1	auxin response factor 9
Exp	2.22773	Up	2.62e-10	Araip.VF47N	terpene synthase 14%3B IPR008930 (Terpenoid cyclases/protein prenyltransferase alpha-alpha toroid)%2C IPR008949 (Terpenoid synthase)%3B GO:0000287 (magnesium ion binding)%2C GO:0008152 (metabolic process)%2C GO:0010333 (terpene synthase activity)%2C GO:0016829 (lyase activity)
Meth	-1.41908	Down	8.62e-14	Araip.VF47N_UP	terpene synthase 14%3B IPR008930 (Terpenoid cyclases/protein prenyltransferase alpha-alpha toroid)%2C IPR008949 (Terpenoid synthase)%3B GO:0000287 (magnesium ion binding)%2C GO:0008152 (metabolic process)%2C GO:0010333 (terpene synthase activity)%2C GO:0016829 (lyase activity)
Exp	-3.29554	Down	2.43e-154	Araip.Z00VV	YABBY transcription factor%3B IPR006780 (YABBY protein)
Meth	-1.386	Down	0.0346905	Araip.Z00VV_DOWN	YABBY transcription factor%3B IPR006780 (YABBY protein)

## Sheet: S2-S3
Type	logFC	The change of S1 relative to S3	PValue	ID	ANNO
Exp	1.31722	Up	1.1e-08	Aradu.1H6YX	sieve element occlusion protein%3B IPR027942 (Sieve element occlusion%2C N-terminal)
Meth	0.861349	Up	0.0331459	Aradu.1H6YX_UP	sieve element occlusion protein%3B IPR027942 (Sieve element occlusion%2C N-terminal)
Exp	1.52051	Up	2.52e-24	Aradu.2BI4W	ATP-binding ABC transporter%3B IPR011527 (ABC transporter type 1%2C transmembrane domain)%2C IPR027417 (P-loop containing nucleoside triphosphate hydrolase)%3B GO:0000166 (nucleotide binding)%2C GO:0005524 (ATP binding)%2C GO:0006810 (transport)%2C GO:0016021 (integral component of membrane)%2C GO:0016887 (ATPase activity)%2C GO:0017111 (nucleoside-triphosphatase activity)%2C GO:0055085 (transmem…
Meth	-0.424175	Down	0.00612938	Aradu.2BI4W_UP	ATP-binding ABC transporter%3B IPR011527 (ABC transporter type 1%2C transmembrane domain)%2C IPR027417 (P-loop containing nucleoside triphosphate hydrolase)%3B GO:0000166 (nucleotide binding)%2C GO:0005524 (ATP binding)%2C GO:0006810 (transport)%2C GO:0016021 (integral component of membrane)%2C GO:0016887 (ATPase activity)%2C GO:0017111 (nucleoside-triphosphatase activity)%2C GO:0055085 (transmem…
Exp	1.71625	Up	1.63e-43	Aradu.2V49U	C2-H2 zinc finger protein [Glycine max]%3B IPR013087 (Zinc finger C2H2-type/integrase DNA-binding domain)%3B GO:0003676 (nucleic acid binding)%2C GO:0046872 (metal ion binding)
Meth	1.36658	Up	0.00947584	Aradu.2V49U_DOWN	C2-H2 zinc finger protein [Glycine max]%3B IPR013087 (Zinc finger C2H2-type/integrase DNA-binding domain)%3B GO:0003676 (nucleic acid binding)%2C GO:0046872 (metal ion binding)
Exp	0.230285	Up	0.00632823	Aradu.32EAS	rootletin-like isoform X3 [Glycine max]
Meth	1.19272	Up	4.61e-05	Aradu.32EAS	rootletin-like isoform X3 [Glycine max]
Exp	0.775124	Up	0.017838	Aradu.3VD4A	Transducin/WD40 repeat-like superfamily protein%3B IPR015943 (WD40/YVTN repeat-like-containing domain)%2C IPR020472 (G-protein beta WD-40 repeat)%3B GO:0005515 (protein binding)
Meth	0.248689	Up	0.00681814	Aradu.3VD4A_DOWN	Transducin/WD40 repeat-like superfamily protein%3B IPR015943 (WD40/YVTN repeat-like-containing domain)%2C IPR020472 (G-protein beta WD-40 repeat)%3B GO:0005515 (protein binding)
Exp	0.562608	Up	0.0251338	Aradu.3Y77K	flocculation protein FLO11-like isoform X3 [Glycine max]
Meth	0.368354	Up	1.68e-09	Aradu.3Y77K_UP	flocculation protein FLO11-like isoform X3 [Glycine max]
Exp	4.43362	Up	1.4e-17	Aradu.5UI2Y	Protein phosphatase 2C family protein%3B IPR001932 (Protein phosphatase 2C (PP2C)-like domain)%2C IPR015655 (Protein phosphatase 2C)%3B GO:0003824 (catalytic activity)
Meth	0.547392	Up	0.0399335	Aradu.5UI2Y	Protein phosphatase 2C family protein%3B IPR001932 (Protein phosphatase 2C (PP2C)-like domain)%2C IPR015655 (Protein phosphatase 2C)%3B GO:0003824 (catalytic activity)
Exp	0.295868	Up	0.000309536	Aradu.82TF8	Translocon-associated protein (TRAP)%2C alpha subunit%3B IPR005595 (Translocon-associated protein (TRAP)%2C alpha subunit)%3B GO:0005783 (endoplasmic reticulum)
Meth	-0.210237	Down	0.00137082	Aradu.82TF8_UP	Translocon-associated protein (TRAP)%2C alpha subunit%3B IPR005595 (Translocon-associated protein (TRAP)%2C alpha subunit)%3B GO:0005783 (endoplasmic reticulum)
Exp	2.82972	Up	6.02e-148	Aradu.8FL49	Ripening related protein family%3B IPR009009 (RlpA-like double-psi beta-barrel domain)
Meth	-0.500161	Down	0.0138973	Aradu.8FL49	Ripening related protein family%3B IPR009009 (RlpA-like double-psi beta-barrel domain)
Exp	-0.585002	Down	1.96e-09	Aradu.8G40J	F-box protein 7%3B IPR001810 (F-box domain)%3B GO:0005515 (protein binding)
Meth	-0.441545	Down	0.00338729	Aradu.8G40J_UP	F-box protein 7%3B IPR001810 (F-box domain)%3B GO:0005515 (protein binding)
Exp	-0.269347	Down	0.00451106	Aradu.99FEF	tRNA (guanine(37)-N1)-methyltransferase%3B IPR003402 (tRNA transferase Trm5/Tyw2)%3B GO:0016740 (transferase activity)
Meth	-0.568176	Down	4.44e-06	Aradu.99FEF_UP	tRNA (guanine(37)-N1)-methyltransferase%3B IPR003402 (tRNA transferase Trm5/Tyw2)%3B GO:0016740 (transferase activity)
Exp	-0.589501	Down	2.23e-09	Aradu.A4FXP	phragmoplast orienting kinesin 2
Meth	-0.350106	Down	0.00419954	Aradu.A4FXP_UP	phragmoplast orienting kinesin 2
Exp	-0.89452	Down	4.24e-23	Aradu.AIW9R	sister chromatid cohesion 1 protein 4%3B IPR006910 (Rad21/Rec8-like protein%2C N-terminal)%2C IPR023093 (Rad21/Rec8-like protein%2C C-terminal)%3B GO:0000228 (nuclear chromosome)%2C GO:0005515 (protein binding)
Meth	-0.748893	Down	0.000138652	Aradu.AIW9R_UP	sister chromatid cohesion 1 protein 4%3B IPR006910 (Rad21/Rec8-like protein%2C N-terminal)%2C IPR023093 (Rad21/Rec8-like protein%2C C-terminal)%3B GO:0000228 (nuclear chromosome)%2C GO:0005515 (protein binding)
Exp	-0.892455	Down	0.000582049	Aradu.B47VE	Unknown protein
Meth	0.358112	Up	0.000945006	Aradu.B47VE_DOWN	Unknown protein
Exp	-0.352078	Down	0.000501681	Aradu.C31L4	ornithine cyclodeaminase/mu-crystallin%3B IPR003462 (Ornithine cyclodeaminase/mu-crystallin)%2C IPR023401 (Ornithine cyclodeaminase%2C N-terminal)
Meth	3.54314	Up	0.000518818	Aradu.C31L4_DOWN	ornithine cyclodeaminase/mu-crystallin%3B IPR003462 (Ornithine cyclodeaminase/mu-crystallin)%2C IPR023401 (Ornithine cyclodeaminase%2C N-terminal)
Exp	0.91558	Up	6.16e-08	Aradu.DA1PG	amino acid permease%3B IPR002293 (Amino acid/polyamine transporter I)%3B GO:0003333 (amino acid transmembrane transport)%2C GO:0006865 (amino acid transport)%2C GO:0015171 (amino acid transmembrane transporter activity)%2C GO:0016020 (membrane)%2C GO:0016021 (integral component of membrane)
Meth	-0.309164	Down	5.35e-05	Aradu.DA1PG_DOWN	amino acid permease%3B IPR002293 (Amino acid/polyamine transporter I)%3B GO:0003333 (amino acid transmembrane transport)%2C GO:0006865 (amino acid transport)%2C GO:0015171 (amino acid transmembrane transporter activity)%2C GO:0016020 (membrane)%2C GO:0016021 (integral component of membrane)
Exp	-0.989876	Down	0.0241176	Aradu.DT3LR	Protein kinase superfamily protein%3B IPR011009 (Protein kinase-like domain)%2C IPR013320 (Concanavalin A-like lectin/glucanase%2C subgroup)%3B GO:0004672 (protein kinase activity)%2C GO:0006468 (protein phosphorylation)
Meth	-0.746847	Down	1.43e-06	Aradu.DT3LR_DOWN	Protein kinase superfamily protein%3B IPR011009 (Protein kinase-like domain)%2C IPR013320 (Concanavalin A-like lectin/glucanase%2C subgroup)%3B GO:0004672 (protein kinase activity)%2C GO:0006468 (protein phosphorylation)
Exp	-0.302682	Down	0.0116867	Aradu.EK5R9	Glutathione S-transferase family protein%3B IPR005955 (Maleylacetoacetate isomerase)%2C IPR010987 (Glutathione S-transferase%2C C-terminal-like)%2C IPR012336 (Thioredoxin-like fold)%3B GO:0003824 (catalytic activity)%2C GO:0005515 (protein binding)%2C GO:0005737 (cytoplasm)%2C GO:0009072 (aromatic amino acid family metabolic process)
Meth	-0.227561	Down	0.0111511	Aradu.EK5R9_UP	Glutathione S-transferase family protein%3B IPR005955 (Maleylacetoacetate isomerase)%2C IPR010987 (Glutathione S-transferase%2C C-terminal-like)%2C IPR012336 (Thioredoxin-like fold)%3B GO:0003824 (catalytic activity)%2C GO:0005515 (protein binding)%2C GO:0005737 (cytoplasm)%2C GO:0009072 (aromatic amino acid family metabolic process)
Exp	1.1479	Up	0.0350883	Aradu.FMV9M	Protein kinase superfamily protein%3B IPR011009 (Protein kinase-like domain)%3B GO:0004672 (protein kinase activity)%2C GO:0006468 (protein phosphorylation)
Meth	0.307438	Up	0.00251282	Aradu.FMV9M	Protein kinase superfamily protein%3B IPR011009 (Protein kinase-like domain)%3B GO:0004672 (protein kinase activity)%2C GO:0006468 (protein phosphorylation)
Exp	-1.20305	Down	1.47e-13	Aradu.FW9WM	uncharacterized protein LOC100783150 isoform X3 [Glycine max]%3B IPR007934 (Alpha-L-arabinofuranosidase B)%2C IPR012878 (Protein of unknown function DUF1680)%3B GO:0003824 (catalytic activity)%2C GO:0046373 (L-arabinose metabolic process)%2C GO:0046556 (alpha-N-arabinofuranosidase activity)
Meth	0.874063	Up	0.0154418	Aradu.FW9WM_DOWN	uncharacterized protein LOC100783150 isoform X3 [Glycine max]%3B IPR007934 (Alpha-L-arabinofuranosidase B)%2C IPR012878 (Protein of unknown function DUF1680)%3B GO:0003824 (catalytic activity)%2C GO:0046373 (L-arabinose metabolic process)%2C GO:0046556 (alpha-N-arabinofuranosidase activity)
Exp	0.291899	Up	0.00057674	Aradu.HIY4R	alpha-mannosidase 3%3B IPR001382 (Glycoside hydrolase%2C family 47)%3B GO:0005509 (calcium ion binding)%2C GO:0016020 (membrane)
Meth	3.78735	Up	7.63e-05	Aradu.HIY4R_DOWN	alpha-mannosidase 3%3B IPR001382 (Glycoside hydrolase%2C family 47)%3B GO:0005509 (calcium ion binding)%2C GO:0016020 (membrane)
Exp	2.39133	Up	6.85e-21	Aradu.I2A4P	17.6 kDa class II heat shock protein%3B IPR008978 (HSP20-like chaperone)
Meth	-0.497039	Down	0.0187936	Aradu.I2A4P_UP	17.6 kDa class II heat shock protein%3B IPR008978 (HSP20-like chaperone)
Exp	0.869487	Up	2.66e-23	Aradu.IDN32	actin depolymerizing factor 5%3B IPR002108 (Actin-depolymerising factor homology domain)%2C IPR017904 (ADF/Cofilin/Destrin)%3B GO:0003779 (actin binding)%2C GO:0005622 (intracellular)%2C GO:0015629 (actin cytoskeleton)%2C GO:0030042 (actin filament depolymerization)
Meth	-0.75407	Down	4.07e-07	Aradu.IDN32_UP	actin depolymerizing factor 5%3B IPR002108 (Actin-depolymerising factor homology domain)%2C IPR017904 (ADF/Cofilin/Destrin)%3B GO:0003779 (actin binding)%2C GO:0005622 (intracellular)%2C GO:0015629 (actin cytoskeleton)%2C GO:0030042 (actin filament depolymerization)
Exp	-0.546025	Down	1.61e-08	Aradu.JK552	Potassium transporter family protein%3B IPR003855 (K+ potassium transporter)%3B GO:0015079 (potassium ion transmembrane transporter activity)%2C GO:0016020 (membrane)%2C GO:0071805 (potassium ion transmembrane transport)
Meth	-0.737974	Down	0.00784804	Aradu.JK552_UP	Potassium transporter family protein%3B IPR003855 (K+ potassium transporter)%3B GO:0015079 (potassium ion transmembrane transporter activity)%2C GO:0016020 (membrane)%2C GO:0071805 (potassium ion transmembrane transport)
Exp	0.605312	Up	7.23e-14	Aradu.JM2ND	RNA-binding protein 1-like [Glycine max]%3B IPR012677 (Nucleotide-binding%2C alpha-beta plait)%3B GO:0000166 (nucleotide binding)%2C GO:0003676 (nucleic acid binding)
Meth	2.74876	Up	0.00418102	Aradu.JM2ND_DOWN	RNA-binding protein 1-like [Glycine max]%3B IPR012677 (Nucleotide-binding%2C alpha-beta plait)%3B GO:0000166 (nucleotide binding)%2C GO:0003676 (nucleic acid binding)
Exp	-1.71997	Down	1.2e-17	Aradu.L7XWE	hypothetical protein
Meth	-0.813562	Down	0.00954913	Aradu.L7XWE_UP	hypothetical protein
Exp	0.711718	Up	2.49e-15	Aradu.LP8UK	subtilisin-like serine protease 3%3B IPR009020 (Proteinase inhibitor%2C propeptide)%2C IPR010435 (Peptidase S8A%2C DUF1034 C-terminal)%2C IPR015500 (Peptidase S8%2C subtilisin-related)%3B GO:0004252 (serine-type endopeptidase activity)%2C GO:0005618 (cell wall)%2C GO:0006508 (proteolysis)%2C GO:0016020 (membrane)%2C GO:0042802 (identical protein binding)%2C GO:0043086 (negative regulation of cata…
Meth	-0.718615	Down	0.00120648	Aradu.LP8UK_UP	subtilisin-like serine protease 3%3B IPR009020 (Proteinase inhibitor%2C propeptide)%2C IPR010435 (Peptidase S8A%2C DUF1034 C-terminal)%2C IPR015500 (Peptidase S8%2C subtilisin-related)%3B GO:0004252 (serine-type endopeptidase activity)%2C GO:0005618 (cell wall)%2C GO:0006508 (proteolysis)%2C GO:0016020 (membrane)%2C GO:0042802 (identical protein binding)%2C GO:0043086 (negative regulation of cata…
Exp	0.30246	Up	0.000842639	Aradu.LR2WR	organellar single-stranded DNA binding protein 3%3B IPR000424 (Primosome PriB/single-strand DNA-binding)%3B GO:0003697 (single-stranded DNA binding)
Meth	1.57757	Up	0.000409595	Aradu.LR2WR_DOWN	organellar single-stranded DNA binding protein 3%3B IPR000424 (Primosome PriB/single-strand DNA-binding)%3B GO:0003697 (single-stranded DNA binding)
Exp	0.537823	Up	1.49e-08	Aradu.M2IMN	non-specific phospholipase C6%3B IPR007312 (Phosphoesterase)%2C IPR017850 (Alkaline-phosphatase-like%2C core domain)%3B GO:0003824 (catalytic activity)%2C GO:0008152 (metabolic process)
Meth	1.03451	Up	0.0212953	Aradu.M2IMN_UP	non-specific phospholipase C6%3B IPR007312 (Phosphoesterase)%2C IPR017850 (Alkaline-phosphatase-like%2C core domain)%3B GO:0003824 (catalytic activity)%2C GO:0008152 (metabolic process)
Exp	0.694689	Up	1.16e-05	Aradu.MA69I	germin-like protein 10%3B IPR001929 (Germin)%3B GO:0030145 (manganese ion binding)%2C GO:0045735 (nutrient reservoir activity)
Meth	0.683298	Up	0.010092	Aradu.MA69I	germin-like protein 10%3B IPR001929 (Germin)%3B GO:0030145 (manganese ion binding)%2C GO:0045735 (nutrient reservoir activity)
Exp	2.34317	Up	0.0385766	Aradu.MD372	LRR and NB-ARC domain disease resistance protein%3B IPR002182 (NB-ARC)%2C IPR003591 (Leucine-rich repeat%2C typical subtype)%2C IPR027417 (P-loop containing nucleoside triphosphate hydrolase)%3B GO:0043531 (ADP binding)
Meth	1.35621	Up	0.0200624	Aradu.MD372	LRR and NB-ARC domain disease resistance protein%3B IPR002182 (NB-ARC)%2C IPR003591 (Leucine-rich repeat%2C typical subtype)%2C IPR027417 (P-loop containing nucleoside triphosphate hydrolase)%3B GO:0043531 (ADP binding)
Exp	-0.36647	Down	2.29e-05	Aradu.ND3NM	oxidoreductase%2C zinc-binding dehydrogenase family protein%3B IPR002085 (Alcohol dehydrogenase superfamily%2C zinc-type)%2C IPR016040 (NAD(P)-binding domain)%2C IPR020843 (Polyketide synthase%2C enoylreductase)%3B GO:0008270 (zinc ion binding)%2C GO:0016491 (oxidoreductase activity)%2C GO:0055114 (oxidation-reduction process)
Meth	-0.436907	Down	5.74e-05	Aradu.ND3NM	oxidoreductase%2C zinc-binding dehydrogenase family protein%3B IPR002085 (Alcohol dehydrogenase superfamily%2C zinc-type)%2C IPR016040 (NAD(P)-binding domain)%2C IPR020843 (Polyketide synthase%2C enoylreductase)%3B GO:0008270 (zinc ion binding)%2C GO:0016491 (oxidoreductase activity)%2C GO:0055114 (oxidation-reduction process)
Exp	1.55197	Up	3.85e-54	Aradu.PF28J	Unknown protein
Meth	0.388785	Up	0.0398812	Aradu.PF28J_DOWN	Unknown protein
Exp	0.917561	Up	3.1e-14	Aradu.QS5ZN	F8K7.25 protein n%3D1 Tax%3DArabidopsis thaliana RepID%3DQ9XHZ5_ARATH
Meth	-0.832949	Down	0.00202431	Aradu.QS5ZN	F8K7.25 protein n%3D1 Tax%3DArabidopsis thaliana RepID%3DQ9XHZ5_ARATH
Exp	0.289392	Up	0.000101075	Aradu.R0Z7V	alpha/beta-Hydrolases superfamily protein
Meth	-0.506698	Down	8.22e-06	Aradu.R0Z7V_UP	alpha/beta-Hydrolases superfamily protein
Exp	3.79905	Up	1.32e-10	Aradu.R8HR4	Cytochrome P450 superfamily protein%3B IPR001128 (Cytochrome P450)%3B GO:0005506 (iron ion binding)%2C GO:0020037 (heme binding)%2C GO:0055114 (oxidation-reduction process)
Meth	0.817268	Up	0.0294957	Aradu.R8HR4_DOWN	Cytochrome P450 superfamily protein%3B IPR001128 (Cytochrome P450)%3B GO:0005506 (iron ion binding)%2C GO:0020037 (heme binding)%2C GO:0055114 (oxidation-reduction process)
Exp	-0.952663	Down	7.43e-28	Aradu.TEL0Q	uncharacterized protein LOC100778886 [Glycine max]%3B IPR006936 (Domain of unknown function DUF640)
Meth	-0.450076	Down	0.000803285	Aradu.TEL0Q_UP	uncharacterized protein LOC100778886 [Glycine max]%3B IPR006936 (Domain of unknown function DUF640)
Exp	-0.377328	Down	2.9e-05	Aradu.TX1LV	microtubule-associated proteins 70-1%3B IPR009768 (Microtubule-associated protein 70)%3B GO:0007010 (cytoskeleton organization)%2C GO:0008017 (microtubule binding)
Meth	-0.684805	Down	0.0149669	Aradu.TX1LV_DOWN	microtubule-associated proteins 70-1%3B IPR009768 (Microtubule-associated protein 70)%3B GO:0007010 (cytoskeleton organization)%2C GO:0008017 (microtubule binding)
Exp	1.25381	Up	7.69e-35	Aradu.TYN4X	protein kinase family protein%3B IPR001611 (Leucine-rich repeat)%2C IPR011009 (Protein kinase-like domain)%2C IPR013320 (Concanavalin A-like lectin/glucanase%2C subgroup)%2C IPR024788 (Malectin-like carbohydrate-binding domain)%3B GO:0004672 (protein kinase activity)%2C GO:0004674 (protein serine/threonine kinase activity)%2C GO:0005515 (protein binding)%2C GO:0005524 (ATP binding)%2C GO:0006468 …
Meth	0.468919	Up	9.87e-05	Aradu.TYN4X_DOWN	protein kinase family protein%3B IPR001611 (Leucine-rich repeat)%2C IPR011009 (Protein kinase-like domain)%2C IPR013320 (Concanavalin A-like lectin/glucanase%2C subgroup)%2C IPR024788 (Malectin-like carbohydrate-binding domain)%3B GO:0004672 (protein kinase activity)%2C GO:0004674 (protein serine/threonine kinase activity)%2C GO:0005515 (protein binding)%2C GO:0005524 (ATP binding)%2C GO:0006468 …
Exp	-0.507865	Down	4.04e-08	Aradu.U677M	hypothetical protein
Meth	0.26622	Up	0.0158057	Aradu.U677M_UP	hypothetical protein
Exp	-0.254732	Down	0.000182443	Aradu.V3PH3	DNA ligase 1%3B IPR000977 (DNA ligase%2C ATP-dependent)%2C IPR012340 (Nucleic acid-binding%2C OB-fold)%3B GO:0003677 (DNA binding)%2C GO:0003910 (DNA ligase (ATP) activity)%2C GO:0005524 (ATP binding)%2C GO:0006260 (DNA replication)%2C GO:0006281 (DNA repair)%2C GO:0006310 (DNA recombination)
Meth	0.795191	Up	0.00137039	Aradu.V3PH3	DNA ligase 1%3B IPR000977 (DNA ligase%2C ATP-dependent)%2C IPR012340 (Nucleic acid-binding%2C OB-fold)%3B GO:0003677 (DNA binding)%2C GO:0003910 (DNA ligase (ATP) activity)%2C GO:0005524 (ATP binding)%2C GO:0006260 (DNA replication)%2C GO:0006281 (DNA repair)%2C GO:0006310 (DNA recombination)
Exp	-0.769911	Down	1.29e-07	Aradu.V6UVG	NAD(P)-binding Rossmann-fold superfamily protein%3B IPR002347 (Glucose/ribitol dehydrogenase)%3B GO:0008152 (metabolic process)%2C GO:0016491 (oxidoreductase activity)
Meth	-0.340089	Down	0.0015667	Aradu.V6UVG	NAD(P)-binding Rossmann-fold superfamily protein%3B IPR002347 (Glucose/ribitol dehydrogenase)%3B GO:0008152 (metabolic process)%2C GO:0016491 (oxidoreductase activity)
Exp	1.0302	Up	1.92e-15	Aradu.VG3TY	DNAJ heat shock N-terminal domain-containing protein%3B IPR026894 (DNAJ-containing protein%2C X-domain)
Meth	1.49832	Up	0.0289601	Aradu.VG3TY_UP	DNAJ heat shock N-terminal domain-containing protein%3B IPR026894 (DNAJ-containing protein%2C X-domain)
Exp	-1.24776	Down	4.86e-06	Aradu.YS6K8	Unknown protein
Meth	0.391445	Up	1.72e-05	Aradu.YS6K8_UP	Unknown protein
Exp	0.681933	Up	3.82e-09	Aradu.ZF1LK	growth-regulating factor 4%3B IPR014977 (WRC)%2C IPR014978 (Glutamine-Leucine-Glutamine%2C QLQ)%3B GO:0005524 (ATP binding)%2C GO:0005634 (nucleus)
Meth	1.5445	Up	7.73e-05	Aradu.ZF1LK	growth-regulating factor 4%3B IPR014977 (WRC)%2C IPR014978 (Glutamine-Leucine-Glutamine%2C QLQ)%3B GO:0005524 (ATP binding)%2C GO:0005634 (nucleus)
Exp	-0.401203	Down	0.00458786	Araip.340VL	pfkB-like carbohydrate kinase family protein
Meth	-0.711895	Down	0.0196925	Araip.340VL_DOWN	pfkB-like carbohydrate kinase family protein
Exp	-0.673181	Down	0.000215939	Araip.3P4XT	HXXXD-type acyl-transferase family protein%3B IPR003480 (Transferase)%2C IPR023213 (Chloramphenicol acetyltransferase-like domain)
Meth	0.475541	Up	0.0015467	Araip.3P4XT_DOWN	HXXXD-type acyl-transferase family protein%3B IPR003480 (Transferase)%2C IPR023213 (Chloramphenicol acetyltransferase-like domain)
Exp	2.05801	Up	9.07e-29	Araip.8E70L	photosystem I reaction center subunit X psaK%3B IPR000549 (Photosystem I PsaG/PsaK protein)%2C IPR023618 (Photosystem I PsaG/PsaK domain)%3B GO:0009522 (photosystem I)%2C GO:0015979 (photosynthesis)%2C GO:0016020 (membrane)%2C GO:0016168 (chlorophyll binding)
Meth	-0.214083	Down	0.0316132	Araip.8E70L_DOWN	photosystem I reaction center subunit X psaK%3B IPR000549 (Photosystem I PsaG/PsaK protein)%2C IPR023618 (Photosystem I PsaG/PsaK domain)%3B GO:0009522 (photosystem I)%2C GO:0015979 (photosynthesis)%2C GO:0016020 (membrane)%2C GO:0016168 (chlorophyll binding)
Exp	-3.55168	Down	0.0005189	Araip.8IP06	glucose 6-phosphate/phosphate translocator 1%3B IPR000620 (Drug/metabolite transporter)%2C IPR004853 (Triose-phosphate transporter domain)%3B GO:0016020 (membrane)
Meth	1.78528	Up	0.00935566	Araip.8IP06	glucose 6-phosphate/phosphate translocator 1%3B IPR000620 (Drug/metabolite transporter)%2C IPR004853 (Triose-phosphate transporter domain)%3B GO:0016020 (membrane)
Exp	-0.642023	Down	0.00804316	Araip.8RP4B	F-box protein interaction domain protein%3B IPR011043 (Galactose oxidase/kelch%2C beta-propeller)%2C IPR017451 (F-box associated interaction domain)
Meth	-1.65025	Down	0.000606169	Araip.8RP4B_UP	F-box protein interaction domain protein%3B IPR011043 (Galactose oxidase/kelch%2C beta-propeller)%2C IPR017451 (F-box associated interaction domain)
Exp	-1.94642	Down	1.11e-06	Araip.A48MR	purple acid phosphatase 22%3B IPR004843 (Calcineurin-like phosphoesterase domain%2C apaH type)%2C IPR008963 (Purple acid phosphatase-like%2C N-terminal)%2C IPR025733 (Iron/zinc purple acid phosphatase-like C-terminal domain)%3B GO:0003993 (acid phosphatase activity)%2C GO:0016787 (hydrolase activity)%2C GO:0046872 (metal ion binding)
Meth	-0.631236	Down	0.000292291	Araip.A48MR	purple acid phosphatase 22%3B IPR004843 (Calcineurin-like phosphoesterase domain%2C apaH type)%2C IPR008963 (Purple acid phosphatase-like%2C N-terminal)%2C IPR025733 (Iron/zinc purple acid phosphatase-like C-terminal domain)%3B GO:0003993 (acid phosphatase activity)%2C GO:0016787 (hydrolase activity)%2C GO:0046872 (metal ion binding)
Exp	-0.690753	Down	0.0015642	Araip.HIZ4E	NADP-specific glutamate dehydrogenase isoform X4 [Glycine max]
Meth	-0.761824	Down	0.0191887	Araip.HIZ4E	NADP-specific glutamate dehydrogenase isoform X4 [Glycine max]
Exp	-0.641703	Down	0.00282064	Araip.K95FG	F-box and associated interaction domains-containing protein%3B IPR001810 (F-box domain)%2C IPR011043 (Galactose oxidase/kelch%2C beta-propeller)%2C IPR017451 (F-box associated interaction domain)%3B GO:0005515 (protein binding)
Meth	3.3744	Up	0.00341804	Araip.K95FG_DOWN	F-box and associated interaction domains-containing protein%3B IPR001810 (F-box domain)%2C IPR011043 (Galactose oxidase/kelch%2C beta-propeller)%2C IPR017451 (F-box associated interaction domain)%3B GO:0005515 (protein binding)
Exp	0.411139	Up	2.54e-12	Araip.NMZ2N	transmembrane 9 superfamily member 4-like [Glycine max]%3B IPR004240 (Nonaspanin (TM9SF))%3B GO:0016021 (integral component of membrane)
Meth	-0.473758	Down	0.0041676	Araip.NMZ2N	transmembrane 9 superfamily member 4-like [Glycine max]%3B IPR004240 (Nonaspanin (TM9SF))%3B GO:0016021 (integral component of membrane)
Exp	-2.33014	Down	0.00257734	Araip.NX83U	Unknown protein
Meth	-0.313782	Down	0.0125829	Araip.NX83U_DOWN	Unknown protein
Exp	0.727468	Up	0.000272973	Araip.PD6GN	uncharacterized protein LOC100817712 isoform X3 [Glycine max]%3B IPR020164 (Cytochrome c oxidase assembly protein COX16)%3B GO:0031966 (mitochondrial membrane)
Meth	-1.10457	Down	0.00244458	Araip.PD6GN	uncharacterized protein LOC100817712 isoform X3 [Glycine max]%3B IPR020164 (Cytochrome c oxidase assembly protein COX16)%3B GO:0031966 (mitochondrial membrane)
Exp	1.17973	Up	1.97e-05	Araip.QFX44	NAD(P)H-quinone oxidoreductase subunit K%3B IPR006138 (NADH-ubiquinone oxidoreductase%2C 20 Kd subunit)%2C IPR013081 (Photosystem II cytochrome b559%2C N-terminal)%3B GO:0008137 (NADH dehydrogenase (ubiquinone) activity)%2C GO:0009523 (photosystem II)%2C GO:0009539 (photosystem II reaction center)%2C GO:0009767 (photosynthetic electron transport chain)%2C GO:0015979 (photosynthesis)%2C GO:0016021…
Meth	-0.21381	Down	0.00894581	Araip.QFX44_DOWN	NAD(P)H-quinone oxidoreductase subunit K%3B IPR006138 (NADH-ubiquinone oxidoreductase%2C 20 Kd subunit)%2C IPR013081 (Photosystem II cytochrome b559%2C N-terminal)%3B GO:0008137 (NADH dehydrogenase (ubiquinone) activity)%2C GO:0009523 (photosystem II)%2C GO:0009539 (photosystem II reaction center)%2C GO:0009767 (photosynthetic electron transport chain)%2C GO:0015979 (photosynthesis)%2C GO:0016021…
Exp	-1.23206	Down	0.0137224	Araip.RP1NL	CTV.20 n%3D1 Tax%3DPoncirus trifoliata RepID%3DQ8H6Q8_PONTR
Meth	-0.382567	Down	0.000621427	Araip.RP1NL_UP	CTV.20 n%3D1 Tax%3DPoncirus trifoliata RepID%3DQ8H6Q8_PONTR
Exp	0.375858	Up	0.000194293	Araip.WC3HA	50S ribosomal protein L22%3B IPR001063 (Ribosomal protein L22/L17)%3B GO:0003735 (structural constituent of ribosome)%2C GO:0005840 (ribosome)%2C GO:0006412 (translation)%2C GO:0015934 (large ribosomal subunit)
Meth	-0.453205	Down	0.00812435	Araip.WC3HA	50S ribosomal protein L22%3B IPR001063 (Ribosomal protein L22/L17)%3B GO:0003735 (structural constituent of ribosome)%2C GO:0005840 (ribosome)%2C GO:0006412 (translation)%2C GO:0015934 (large ribosomal subunit)
Exp	-1.86867	Down	0.0351591	Araip.YF7Q9	cytoplasmic membrane protein
Meth	-0.233589	Down	0.013996	Araip.YF7Q9_UP	cytoplasmic membrane protein
Exp	-0.861203	Down	0.0273499	Araip.Z1MFG	Disease resistance protein (TIR-NBS-LRR class) family%3B IPR000767 (Disease resistance protein)%2C IPR027417 (P-loop containing nucleoside triphosphate hydrolase)%3B GO:0006952 (defense response)%2C GO:0043531 (ADP binding)
Meth	-0.572847	Down	5.37e-05	Araip.Z1MFG_DOWN	Disease resistance protein (TIR-NBS-LRR class) family%3B IPR000767 (Disease resistance protein)%2C IPR027417 (P-loop containing nucleoside triphosphate hydrolase)%3B GO:0006952 (defense response)%2C GO:0043531 (ADP binding)
Exp	0.837846	Up	4.41e-06	Araip.ZU8AU	disease resistance protein (CC-NBS-LRR class) family protein%3B IPR000767 (Disease resistance protein)%2C IPR027417 (P-loop containing nucleoside triphosphate hydrolase)%3B GO:0006952 (defense response)%2C GO:0043531 (ADP binding)
Meth	-0.551558	Down	0.0058069	Araip.ZU8AU_UP	disease resistance protein (CC-NBS-LRR class) family protein%3B IPR000767 (Disease resistance protein)%2C IPR027417 (P-loop containing nucleoside triphosphate hydrolase)%3B GO:0006952 (defense response)%2C GO:0043531 (ADP binding)
Meth	0.0208332	Up	0.911692	Araip.ZU8AU	disease resistance protein (CC-NBS-LRR class) family protein%3B IPR000767 (Disease resistance protein)%2C IPR027417 (P-loop containing nucleoside triphosphate hydrolase)%3B GO:0006952 (defense response)%2C GO:0043531 (ADP binding)
